# Supplementary material
Source: publisher site journal article supplement (https://www.dovepress.com/article/576712)
Supplement: Supplementary file 1 [file 576712%20Revised%20Supplementary%20Materials.pdf]

## Supplementary Materials

**Table S1: the Full List of CA-RGs**

| Gene Name   |              |              |         |             |              |              |              |              |             |
|-------------|--------------|--------------|---------|-------------|--------------|--------------|--------------|--------------|-------------|
| ACTR2       | ACTR3        | AGO4         | ALMS1   | ANAPC1      | ANAPC10      | ANAPC11      | ANAPC13      | ANAPC15      | ANAPC16     |
| ANAPC2      | ANAPC4       | ANAPC5       | ANAPC7  | ANKLE1      | ANKRD31      | ARHGEF10     | ARL2         | ASPM         | ASZ1        |
| ATF5        | ATM          | ATRX         | AURKA   | AURKC       | BAG6         | BBS4         | BCL2L11      | BOLL         | BRCA1       |
| BRCA2       | BRDT         | BRIP1        | BRME1   | BRSK1       | BTBD18       | BUB1         | BUB1B        | BUB3         | C10orf90    |
| C11orf80    | C14orf39     | C1orf146     | C2CD3   | CALR        | CATSPE<br>RZ | CCDC10<br>2B | CCDC57       | CCNA1        | CCNB1IP1    |
| CCNB2       | CCNB3        | CCNE1        | CCNE2   | CCNF        | CCNL1        | CCNL2        | CCP110       | CDC16        | CDC20       |
| CDC23       | CDC25A       | CDC25B       | CDC25C  | CDC26       | CDC27        | CDK1         | CDK2         | CDK5RA<br>P2 | CENATA<br>C |
| CENPC       | CENPJ        | CENPS        | CENPX   | CEP120      | CEP131       | CEP135       | CEP152       | CEP192       | CEP250      |
| CEP295      | CEP295<br>NL | CEP44        | CEP63   | CEP68       | CEP72        | CEP76        | CEP85        | CETN1        | CETN2       |
| CETN3       | CHD3         | CHEK1        | CHFR    | CHMP1A      | CHMP1B       | CHMP2A       | CHMP2B       | CHMP3        | CHMP4B      |
| CHMP4C      | CHMP5        | CHORDC<br>1  | CKAP5   | CKS2        | CNTD1        | CNTLN        | CNTROB       | CORT         | CROCC       |
| CTNNB1      | CYP26B<br>1  | DCTN1        | DDX4    | DEUP1       | DMC1         | DMRT1        | DMRTC2       | DNMT3L       | DUSP1       |
| DUSP13      | EDN1         | EDNRA        | EHMT2   | EME1        | EME2         | ERCC1        | ERCC4        | EREG         | ESPL1       |
| EXD1        | EXO1         | FAM9A        | FAM9B   | FAM9C       | FANCA        | FANCD2       | FANCM        | FBXO43       | FBXO5       |
| FBXW5       | FES          | FIGNL1       | FKBP6   | FMN2        | FOXJ2        | FOXJ3        | FZR1         | GADD45<br>A  | GEN1        |
| GOLGA2      | GPR3         | H1-8         | H2AX    | HAUS1       | HAUS2        | HAUS3        | HAUS4        | HAUS5        | HAUS6       |
| HAUS7       | HAUS8        | HEPACA<br>M2 | HFM1    | HORMA<br>D1 | HORMA<br>D2  | HSF2BP       | HSPA2        | HUS1         | HUS1B       |
| IHO1        | INCENP       | ING2         | INSR    | KASH5       | KAT2A        | KAT2B        | KIAA075<br>3 | KIAA161<br>4 | KIF11       |
| KIF18A      | KIF25        | KIF3A        | KIF3B   | KLHDC3      | LFNG         | LIF          | M1AP         | MAEL         | MAJIN       |
| MAP9        | MAPK15       | MARF1        | MARK4   | MASTL       | MCMDC<br>2   | MCPH1        | MDM1         | MEI1         | MEI4        |
| MEIKIN      | MEIOB        | MEIOC        | MEIOSIN | METTL3      | MLH1         | MLH3         | MND1         | MNS1         | MOS         |
| MOV10L<br>1 | MRE11        | MSH4         | MSH5    | MSH6        | MSX1         | MSX2         | MUS81        | MYBL1        | MYH9        |
| NANOS2      | NAT10        | NBN          | NCAPD2  | NCAPD3      | NCAPH        | NCAPH2       | NDC1         | NDC80        | NDE1        |
| NDEL1       | NEK2         | NIN          | NPM1    | NPM2        | NPPC         | NPR2         | NSFL1C       | NSUN2        | NUBP1       |
| NUF2        | NUMA1        | NUP62        | ODF2    | OOEP        | OSGIN2       | OVOL1        | P3H4         | PARD6A       | PARD6B      |
| PAR6G       | PCLAF        | PCM1         | PDCD6IP | PDE3A       | PDE4DIP      | PDIK1L       | PIWIL1       | PIWIL2       | PIWIL3      |

|          |           |         |          |         |         |         |         |         |          |
|----------|-----------|---------|----------|---------|---------|---------|---------|---------|----------|
| PIWIL4   | PKD2      | PKHD1   | PKMYT1   | PLCB1   | PLD6    | PLK1    | PLK2    | PLK4    | POC1B    |
| PPP1R12A | PPP1R35   | PPP2CA  | PPP2R1A  | PRDM7   | PRDM9   | PRR19   | PSMA8   | PSMC3IP | PSMD13   |
| PTTG1    | PTTG2     | PTTG3P  | RAB6C    | RAD1    | RAD21   | RAD21L1 | RAD50   | RAD51   | RAD51AP1 |
| RAD51B   | RAD51C    | RAD51D  | RAD54B   | RAD54L  | RANBP1  | RBBP8   | RBM14   | RBM7    | REC114   |
| REC8     | RMI1      | RNF212  | RNF212B  | ROCK2   | RPA1    | RPL10L  | RPS6KA2 | RSPH1   | RTTN     |
| SAC3D1   | SASS6     | SDCCAG8 | SGO1     | SGO2    | SHCBP1L | SHOC1   | SIRT1   | SIRT2   | SIRT7    |
| SLC16A1  | SLC25A31  | SLC26A8 | SLC2A8   | SLX4    | SMC1A   | SMC1B   | SMC2    | SMC3    | SMC4     |
| SPATA22  | SPDYA     | SPICE1  | SPIN1    | SPIRE1  | SPIRE2  | SPO11   | SSX2IP  | STAG1   | STAG2    |
| STAG3    | STIL      | STK35   | STRA8    | SUN1    | SUN2    | SYCE1   | SYCE1L  | SYCE2   | SYCE3    |
| SYCP1    | SYCP2     | SYCP2L  | SYCP3    | TAF1L   | TDRD1   | TDRD12  | TDRD9   | TDRKH   | TERB1    |
| TERB2    | TERF1     | TESMIN  | TEX11    | TEX12   | TEX14   | TEX15   | TEX19   | TMEM67  | NPHP11   |
| TOP2A    | TOP2B     | TOP3A   | TRIM37   | TRIM75  | TRIP13  | TTK     | TUBB8   | TUBE1   | TUBG1    |
| TUBG2    | TUBGP2    | TUBGCP3 | TUBGCP4  | TUBGCP5 | TUBGCP6 | UBB     | UBE2B   | UBR2    | UBXN2B   |
| USP17L2  | USP33     | UTP14C  | UVRAG    | UXT     | VPS4B   | WASHC5  | WBP2NL  | WDR62   | WEE2     |
| WNT4     | WNT5A     | XPO1    | XRCC2    | XRCC3   | YTHDC2  | YTHDF2  | ZCWPW1  | ZFP42   | ZNF318   |
| ZSCAN21  | ZW10      | JBTS6   | MECKELIN | MKS3    | NPHP11  | TNEM67  | ACTR1A  | ACTR1B  | AGBL2    |
| AGBL4    | AJUBA     | AKAP11  | AKAP9    | ALDOB   | ARFGEF2 | ARL2BP  | ARL3    | ATF4    | AUNIP    |
| BBS1     | BBS2      | BBS5    | BBS7     | BBS9    | BCL2L1  | BIRC6   | BLOC1S2 | BOD1    | BOD1L2   |
| BRSK2    | C14orf166 | C4orf47 | C7orf31  | CAMK2B  | CC2D1A  | CCDC113 | CCDC116 | CCDC124 | CCDC13   |
| CCDC14   | CCDC141   | CCDC146 | CCDC151  | CCDC28B | CCDC38  | CCDC64  | CCDC78  | CCDC8   | CCDC81   |
| CCDC85B  | CCDC92    | CCDC96  | CCNB1    | CCSAP   | CCT4    | CCT5    | CCT8    | CDC14A  | CDC42    |
| CDK5RAP3 | CDK6      | CEP104  | CEP112   | CEP126  | CEP128  | CEP162  | CEP164  | CEP170  | CEP19    |
| CEP290   | CEP350    | CEP41   | CEP55    | CEP57   | CEP57L1 | CEP70   | CEP78   | CEP83   | CEP85L   |
| CEP89    | CEP95     | CEP97   | CFAP20   | CHD4    | CIB1    | CIR1    | CLASP1  | CLASP2  | CLIC4    |
| CLIC5    | CNTRL     | CRMP1   | CSNK1A1  | CSNK1D  | CSPP1   | CTDP1   | CUL7    | CYLD    | DCAF12   |
| DCLRE1B  | DCTN2     | DCTN3   | DCTN4    | DIAPH1  | DISC1   | DTL     | DZIP1   | ECM29   | EFHC1    |
| ERCC6L2  | EVI5      | FAM110A | FAM110B  | FAM110C | FBF1    | FBXL7   | FEZ1    | FGFR10P | FIGN     |
| FLII     | FOPNL     | FRY     | FSD1     | FTCD    | GNAI1   | GNAI2   | GNAI3   | HERC2   | HOOK2    |
| IFT140   | IFT20     | IFT88   | IQCB1    | IST1    | JTB     | KATNA1  | KATNB1  | KIAA058 | KIF13A   |

|             |             |        |         |             |             |              |              |               |               |
|-------------|-------------|--------|---------|-------------|-------------|--------------|--------------|---------------|---------------|
|             |             |        |         |             |             |              |              | 6             |               |
| KIF20B      | KIF24       | KIF2A  | KIF2B   | KIFC1       | KIFC3       | KIZ          | KLHL22       | LATS1         | LATS2         |
| LCA5        | LRMP        | LRRC45 | LRRCC1  | LRWD1       | LZTS2       | MAD1L1       | MAK          | MAP10         | MAP2K1        |
| MAP3K1<br>1 | MAPK1       | MAPRE1 | MIB1    | MKKS        | MKS1        | MLLT11       | MPHOSP<br>H9 | MPLKIP        | MTUS1         |
| MVB12A      | MZT1        | MZT2A  | MZT2B   | NCKAP5<br>L | NDRG1       | NEDD1        | NEIL1        | NEK1          | NEK6          |
| NEK7        | NEURL4      | NINL   | NPHP4   | NR3C1       | NUBP2       | NUDCD2       | OBSL1        | OFD1          | PAFAH1<br>B1  |
| PARP3       | PCNT        | PDE4D  | PHF1    | PIBF1       | PLA2G3      | PLEKHA<br>7  | PLK3         | POC1A         | POC5          |
| PPP1R42     | PPP4C       | PPP4R2 | PPP4R3A | PPP4R3B     | PSKH1       | PTK2         | PTPN20       | RAB11FI<br>P3 | RAB11FI<br>P4 |
| RAB8A       | RABGA<br>P1 | RAD18  | RASSF1  | RASSF10     | RASSF7      | RBBP6        | RELB         | RGCC          | RGS14         |
| RILPL1      | RILPL2      | RITA1  | RNF19A  | ROCK1       | RPGR        | RPGRIP1<br>L | RPS7         | RUVBL1        | SAXO1         |
| SCLT1       | SCYL1       | 2-Sep  | SFI1    | SLF1        | SLMAP       | SNCG         | SNX10        | SPAG5         | SPAST         |
| SPATC1      | SPDL1       | SSNA1  | STARD9  | STOX1       | STX1B       | TACC1        | TACC2        | TBCCD1        | TCP1          |
| TMUB1       | TOPBP1      | TPGS1  | TRIOBP  | TRIP4       | TSKS        | TSSK2        | TTBK2        | TTC19         | TTC23L        |
| TTC28       | TTC8        | TUBD1  | TXNDC9  | UBXN6       | UNC119      | USP20        | WASH1        | WASH2P        | WASH3P        |
| WDR35       | WRAP73      | YES1   | ZFYVE19 | ZFYVE2<br>6 | ZMYND1<br>0 | ZNF365       |              |               |               |

**Table S2: Clinical Information of Included Samples**

| Serial number | Gender (male/female) | Age (Years) | height (cm) | weight (kg) | Kellgren-Lawrence (K-L) Grade | disease course (Years) | enrollment time | specimen site   | specimen size    |
|---------------|----------------------|-------------|-------------|-------------|-------------------------------|------------------------|-----------------|-----------------|------------------|
| OA1           | Female               | 67          | 160         | 56          | 4                             | 2                      | 2024. 5. 23     | femoral condyle | rice grain-sized |
| OA2           | Female               | 58          | 159         | 61.5        | 4                             | 1.5                    | 2024. 5. 28     | tibial condyle  | rice grain-sized |
| OA3           | Male                 | 55          | 168         | 70          | 3                             | 2                      | 2024. 5. 28     | femoral condyle | rice grain-sized |
| OA4           | Male                 | 51          | 168         | 72          | 4                             | 1                      | 2024. 5. 30     | femoral condyle | rice grain-sized |
| OA5           | Male                 | 72          | 170         | 80          | 4                             | 3                      | 2024. 5. 30     | femoral condyle | rice grain-sized |
| control 1     | Male                 | 42          | 170         | 65          | 0                             | 0                      | 2024. 9. 14     | femoral condyle | rice grain-sized |

|              |      |    |     |    |   |   |             |                    |                     |
|--------------|------|----|-----|----|---|---|-------------|--------------------|---------------------|
| control<br>2 | Male | 42 | 168 | 47 | 0 | 0 | 2024. 11. 4 | femoral<br>condyle | rice<br>grain-sized |
| control<br>3 | Male | 38 | 175 | 75 | 0 | 0 | 2025. 3. 14 | femoral<br>condyle | rice<br>grain-sized |
| control<br>4 | Male | 44 | 153 | 65 | 0 | 0 | 2025. 5. 8  | femoral<br>condyle | rice<br>grain-sized |
| control<br>5 | Male | 41 | 170 | 70 | 0 | 0 | 2025. 5. 29 | femoral<br>condyle | rice<br>grain-sized |

**Table S3: Correlated primer sequence**

| Primer |   | Sequence               |
|--------|---|------------------------|
| PLK2   | F | GCGGACTATCACCTACCAGC   |
| PLK2   | R | CCCGAGTGCGAATGGTGG     |
| SUN2   | F | TGGAGGAACTGCATGGTGAC   |
| SUN2   | R | ATCCGAGTAGCCCACGTAGT   |
| GAPDH  | F | CGAAGGTGGAGTCAACGGATTT |
| GAPDH  | R |                        |

**Table S4: Detailed results of GO functional enrichment analysis (landscape format, provided separately at the end of this file)**

**Table S5: F Statistics of Qualified IV SNPs for MR Analysis**

| SNP         | F           |
|-------------|-------------|
| rs116397662 | 29.79292102 |
| rs34316188  | 274.0126728 |
| rs344044    | 72.26183893 |
| rs60204765  | 44.55425115 |
| rs62274129  | 1562.234135 |
| rs62276505  | 1549.322361 |
| rs62278582  | 950.7997782 |
| rs73013957  | 44.75334203 |
| rs74694767  | 30.546576   |
| rs7635194   | 241.8075408 |
| rs76571345  | 33.33916031 |
| rs79920523  | 64.74001158 |
| rs1150347   | 80.21142472 |
| rs12275999  | 25.82864455 |
| rs17207890  | 944.7844474 |
| rs500054    | 1149.374683 |
| rs692806    | 181.4829037 |
| rs7938725   | 328.6143459 |
| rs1605740   | 42.87874206 |
| rs34384235  | 33.50538091 |

|             |             |
|-------------|-------------|
| rs62366403  | 54.8089122  |
| rs76917228  | 25.29086975 |
| rs4091703   | 387.457683  |
| rs4680572   | 333.376137  |
| rs55667203  | 31.44202654 |
| rs55731730  | 419.9151415 |
| rs62270444  | 30.13559058 |
| rs6441324   | 344.0522617 |
| rs1013339   | 2140.679743 |
| rs11704021  | 1808.828921 |
| rs1354034   | 41.77263578 |
| rs138430    | 1845.917048 |
| rs139307    | 28.45046434 |
| rs17827494  | 451.2234718 |
| rs35607824  | 79.87164824 |
| rs4619721   | 112.4152961 |
| rs5757333   | 252.0666452 |
| rs79409900  | 31.85913613 |
| rs10400322  | 42.00365068 |
| rs10899150  | 155.805664  |
| rs11236557  | 261.1840532 |
| rs11236612  | 169.9163766 |
| rs117143578 | 67.63564397 |
| rs192134125 | 109.9648283 |
| rs36016715  | 172.8991105 |
| rs61895075  | 25.40281666 |
| rs7130007   | 67.16464275 |
| rs77845531  | 73.62820544 |
| rs78131992  | 49.5602742  |
| rs78757099  | 30.35574729 |

**Table S6: GO Enrichment Analysis Results (landscape format, provided separately at the end of this file)**

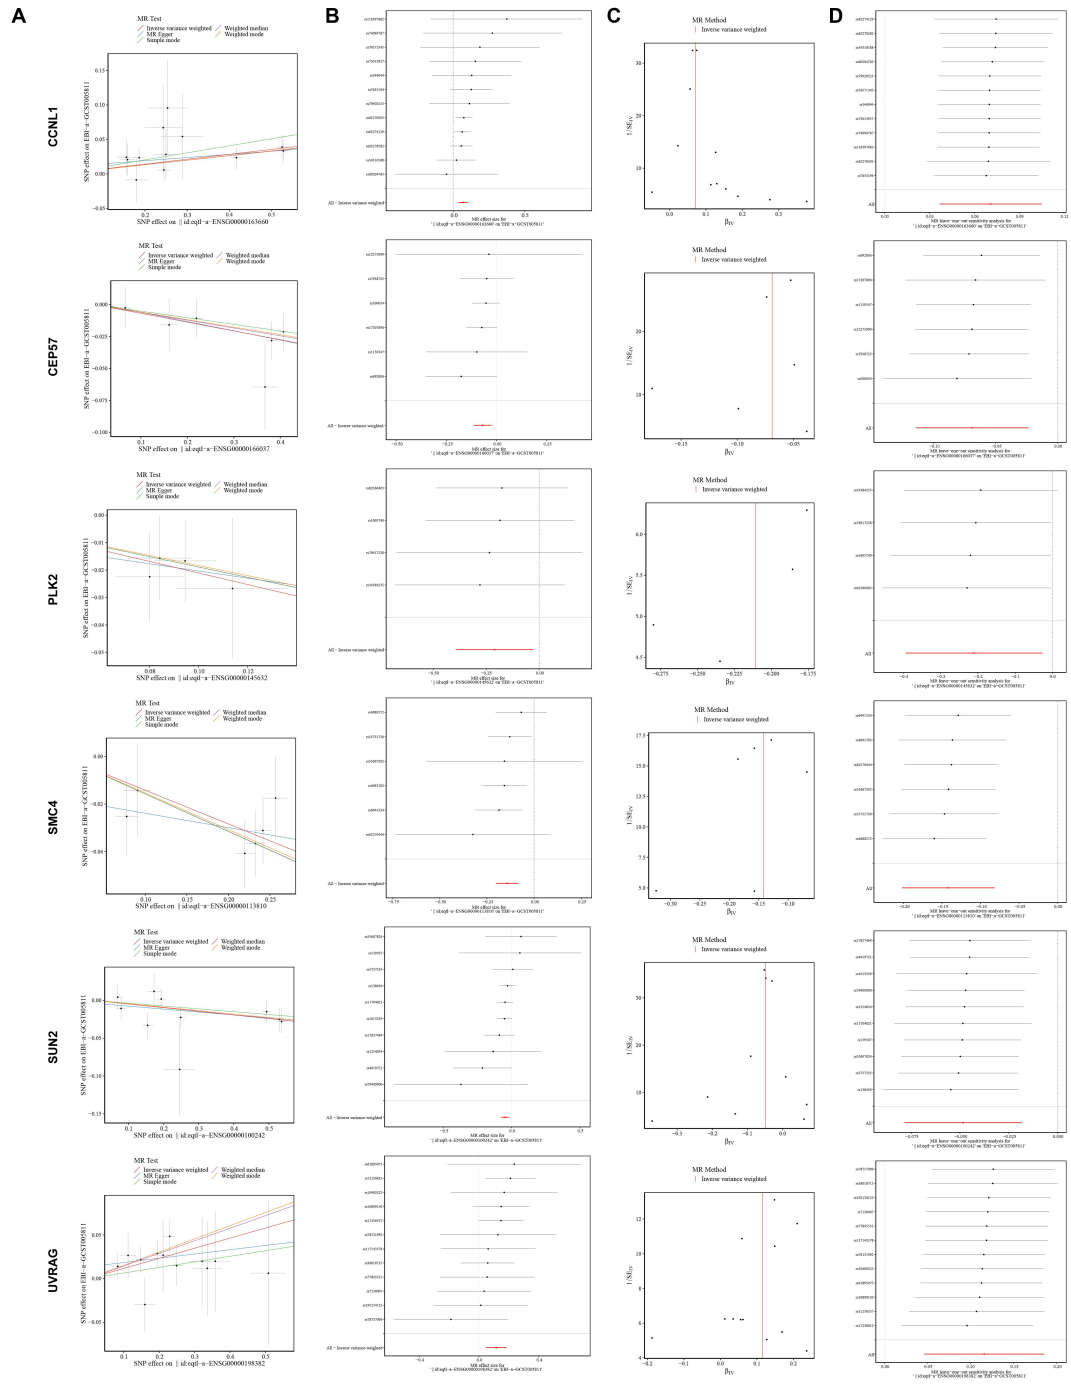

**Figure S1: MR analysis results. (A) Scatter plots of exposure-outcome associations. (B) Forest plots of SNP effects. (C) Funnel plots for MR validity. (D) Leave-one-out sensitivity analysis.**

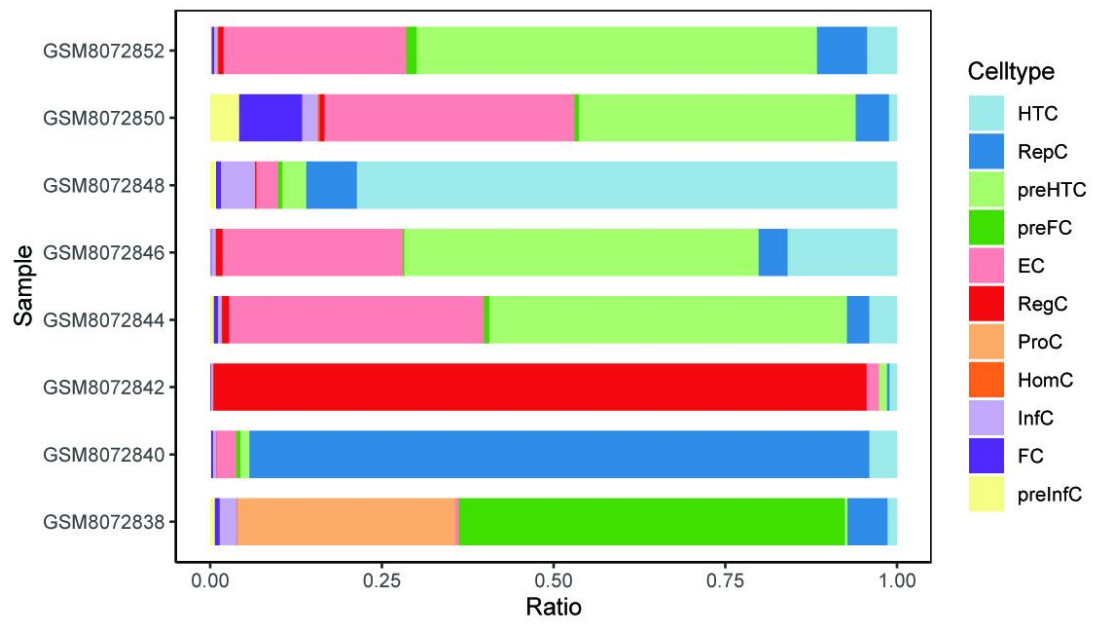

**Figure S2:** Proportion of cell types in individual samples from the scRNA-seq dataset.

| Table S4   | ONTOLOGY | ID         | Description                                                 | GeneRatio | BgRatio   | pvalue                   | p. adjust                | qvalue                   | geneID                                                                                                                                                                                                                                                                                                                                                                                               | Count | richFactor            |
|------------|----------|------------|-------------------------------------------------------------|-----------|-----------|--------------------------|--------------------------|--------------------------|------------------------------------------------------------------------------------------------------------------------------------------------------------------------------------------------------------------------------------------------------------------------------------------------------------------------------------------------------------------------------------------------------|-------|-----------------------|
|            |          |            |                                                             |           |           |                          |                          |                          | SMC4/TOP2A<br>/DUSP1/RBM<br>7/INSR/SUN<br>2/SHCBP1L/<br>RMI1/MSX1/<br>NDC80/CYP2<br>6B1/EDN1/C<br>CNB1IP1/AS<br>PM/ATM/RPA<br>GADD45A/CC<br>NL1/CCDC10<br>2B/MARK4/P<br>LK2/CEP72/<br>UVRAG/KIF1<br>1/CLASP2/N<br>DC80/SSX2I<br>P/PFAFH1B1<br>/CETN2/CDK<br>SMC4/TOP2A<br>/DUSP1/INS<br>R/CUL7/SHC<br>BP1L/RMI1/<br>MSX1/KIF11<br>/CLASP2/ND<br>C80/SPDL1/<br>CYP26B1/RG<br>CC/EDN1/CC<br>NB1IP1/ASP |       |                       |
| GO:0051321 | BP       | GO:0051321 | meiotic<br>cell cycle                                       | 17/42     | 285/18903 | 1.20937196<br>32858e-20  | 2.07044480<br>114529e-17 | 1.36595380<br>695333e-17 |                                                                                                                                                                                                                                                                                                                                                                                                      | 17    | 0.59649122<br>8070175 |
| GO:0031023 | BP       | GO:0031023 | microtubul<br>e<br>organizing<br>center<br>organizati<br>on | 14/42     | 150/18903 | 9.23214061<br>860346e-20 | 7.90271236<br>952456e-17 | 5.21372993<br>882185e-17 |                                                                                                                                                                                                                                                                                                                                                                                                      | 14    | 0.93333333<br>3333333 |
| GO:0000280 | BP       | GO:0000280 | nuclear<br>division                                         | 18/42     | 481/18903 | 2.94074654<br>824938e-18 | 1.67818603<br>020098e-15 | 1.10716527<br>939354e-15 |                                                                                                                                                                                                                                                                                                                                                                                                      | 18    | 0.37422037<br>4220374 |

|            |    |            |                                        |       |           |                          |                          |                          |                                                                                                                                         |    |                       |
|------------|----|------------|----------------------------------------|-------|-----------|--------------------------|--------------------------|--------------------------|-----------------------------------------------------------------------------------------------------------------------------------------|----|-----------------------|
| GO:0007098 | BP | GO:0007098 | centrosome cycle                       | 12/42 | 135/18903 | 9.85500317<br>257915e-17 | 4.21794135<br>786387e-14 | 2.78274168<br>530985e-14 | GADD45A/CC<br>NL1/CCDC10<br>2B/MARK4/P<br>LK2/CEP72/<br>UVRAG/KIF1<br>1/NDC80/SS<br>X2IP/CETN2<br>SMC4/TOP2A<br>/SHCBP1L/R              | 12 | 0.88888888<br>8888889 |
| GO:1903046 | BP | GO:1903046 | meiotic cell cycle process             | 11/42 | 212/18903 | 8.59284252<br>866617e-13 | 2.94218928<br>181529e-10 | 1.94107790<br>173869e-10 | MI1/MSX1/N<br>DC80/CYP26<br>B1/EDN1/CC<br>NB1IP1/ASP<br>SMC4/TOP2A<br>/SHCBP1L/R                                                        | 11 | 0.51886792<br>4528302 |
| GO:0140013 | BP | GO:0140013 | meiotic nuclear division               | 10/42 | 194/18903 | 1.13638101<br>69263e-11  | 3.24247383<br>496306e-09 | 2.13918742<br>30911e-09  | MI1/MSX1/N<br>DC80/CYP26<br>B1/CCNB1IP<br>1/ASPM/ATM<br>DUSP1/INSR<br>/CUL7/MSX1<br>/NDC80/SPD<br>L1/RGCC/ED<br>N1/ATM                  | 10 | 0.51546391<br>7525773 |
| GO:0051783 | BP | GO:0051783 | regulation of nuclear division         | 9/42  | 145/18903 | 2.57322590<br>169271e-11 | 6.29337534<br>813989e-09 | 4.15198705<br>641546e-09 | SMC4/DUSP1<br>/INSR/CUL7<br>/KIF11/CLA<br>SP2/NDC80/<br>SPDL1/RGCC<br>/EDN1/ATM<br>DUSP1/INSR<br>/CUL7/NDC8<br>0/SPDL1/RG<br>CC/EDN1/AT | 9  | 0.62068965<br>5172414 |
| GO:0140014 | BP | GO:0140014 | mitotic nuclear division               | 11/42 | 325/18903 | 8.72643449<br>831605e-11 | 1.86745698<br>263963e-08 | 1.23203476<br>535436e-08 |                                                                                                                                         | 11 | 0.33846153<br>8461538 |
| GO:0007088 | BP | GO:0007088 | regulation of mitotic nuclear division | 8/42  | 118/18903 | 1.79288349<br>527689e-10 | 3.41046282<br>657116e-08 | 2.25001636<br>307849e-08 |                                                                                                                                         | 8  | 0.67796610<br>1694915 |

|            |    |            |                                                                                           |       |           |                          |                          |                          |                                                                                                                                                                    |    |                       |
|------------|----|------------|-------------------------------------------------------------------------------------------|-------|-----------|--------------------------|--------------------------|--------------------------|--------------------------------------------------------------------------------------------------------------------------------------------------------------------|----|-----------------------|
| GO:0033044 | BP | GO:0033044 | regulation of chromosome organization                                                     | 9/42  | 252/18903 | 3.50323949<br>125125e-09 | 5.99754600<br>902215e-07 | 3.95681681<br>485536e-07 | SMC4/TOP2A<br>/DUSP1/SHC<br>BP1L/NDC80<br>/MAPK1/SPDL1/ATM/CDK<br>SMC4/TOP2A<br>/DUSP1/RMI                                                                         | 9  | 0.35714285<br>7142857 |
| GO:0007059 | BP | GO:0007059 | chromosome segregation                                                                    | 10/42 | 382/18903 | 8.35452730<br>941653e-09 | 1.30026825<br>033828e-06 | 8.57838067<br>273104e-07 | 1/UVRAG/KIF11/NDC80/<br>SPDL1/CCNB1IP1/ATM<br>PLK2/SUN2/<br>CEP72/UVRAG/KIF11/CL<br>ASP2/NDC80<br>/ASPM<br>SMC4/TOP2A                                              | 10 | 0.26178010<br>4712042 |
| GO:0007051 | BP | GO:0007051 | spindle organization                                                                      | 8/42  | 195/18903 | 9.70866920<br>20632e-09  | 1.38510347<br>282768e-06 | 9.13807197<br>702966e-07 | SMC4/TOP2A<br>/DUSP1/RMI<br>1/NDC80/SPDL1/ATM<br>TOP2A/SHCB<br>P1L/CEP57/<br>NDC80/PAFA<br>H1B1/CYP26<br>B1/EDN1/CCNB1IP1/ASP<br>M/ATM<br>SMC4/TOP2A<br>/DUSP1/RMI | 8  | 0.41025641<br>025641  |
| GO:0051304 | BP | GO:0051304 | chromosome separation                                                                     | 7/42  | 135/18903 | 1.77485665<br>545613e-08 | 2.33734968<br>780069e-06 | 1.54204145<br>044893e-06 | 1/NDC80/SPDL1/ATM<br>TOP2A/SHCB<br>P1L/CEP57/<br>NDC80/PAFA<br>H1B1/CYP26<br>B1/EDN1/CCNB1IP1/ASP<br>M/ATM<br>SMC4/TOP2A<br>/DUSP1/RMI                             | 7  | 0.51851851<br>8518518 |
| GO:0022412 | BP | GO:0022412 | cellular process involved in reproduction in multicellular nuclear chromosome segregation | 10/42 | 430/18903 | 2.56568151<br>135437e-08 | 3.13746196<br>24562e-06  | 2.06990696<br>367161e-06 | SMC4/TOP2A<br>/DUSP1/RMI<br>1/KIF11/NDC80/SPDL1/<br>CCNB1IP1/A                                                                                                     | 10 | 0.23255813<br>9534884 |
| GO:0098813 | BP | GO:0098813 | nuclear chromosome segregation                                                            | 9/42  | 321/18903 | 2.86064445<br>59549e-08  | 3.26494887<br>239653e-06 | 2.15401508<br>85892e-06  | SMC4/TOP2A<br>/DUSP1/RMI<br>1/KIF11/NDC80/SPDL1/<br>CCNB1IP1/A                                                                                                     | 9  | 0.28037383<br>1775701 |

|            |    |            |                                                            |      |           |                      |                      |                      |                                                    |   |                   |
|------------|----|------------|------------------------------------------------------------|------|-----------|----------------------|----------------------|----------------------|----------------------------------------------------|---|-------------------|
| GO:1902850 | BP | GO:1902850 | microtubule cytoskeleton organization                      | 7/42 | 163/18903 | 6.52101722446204e-08 | 6.97748843017438e-06 | 4.6033233433209e-06  | PLK2/SUN2/KIF11/CLASP2/NDC80/SPDL1/PFAFH1B1        | 7 | 0.429447852760736 |
| GO:0140694 | BP | GO:0140694 | non-membrane-bounded organelle assembly                    | 9/42 | 386/18903 | 1.3824494965912e-07  | 1.39220796362596e-05 | 9.18494309499914e-06 | PLK2/CEP72/KIF11/CLASP2/NDC80/EDN1/CETN2/ASPM/CDK2 | 9 | 0.233160621761658 |
| GO:0051653 | BP | GO:0051653 | spindle localization                                       | 5/42 | 59/18903  | 1.93976428394426e-07 | 1.84493136339588e-05 | 1.21717372904807e-05 | CLASP2/NDC80/SPDL1/PFAFH1B1/AS                     | 5 | 0.847457627118644 |
| GO:1901991 | BP | GO:1901991 | negative regulation of mitotic cell cycle phase transition | 7/42 | 194/18903 | 2.14222907630361e-07 | 1.93026114664831e-05 | 1.27346914065029e-05 | DUSP1/PLK2/NDC80/SPDL1/RGCC/ATM/CDK2               | 7 | 0.360824742268041 |
| GO:0051298 | BP | GO:0051298 | centrosome duplication                                     | 5/42 | 74/18903  | 6.09046960090043e-07 | 5.21344197837077e-05 | 3.43951256935061e-05 | PLK2/CEP72/NDC80/CETN2/CDK2                        | 5 | 0.675675675675676 |
| GO:0007093 | BP | GO:0007093 | mitotic cell cycle checkpoint signaling                    | 6/42 | 141/18903 | 6.51000788680236e-07 | 5.30720642962173e-05 | 3.50137266292678e-05 | DUSP1/PLK2/NDC80/SPDL1/ATM/CDK2                    | 6 | 0.425531914893617 |
| GO:0000819 | BP | GO:0000819 | sister chromatid segregation                               | 7/42 | 239/18903 | 8.75467195289926e-07 | 6.81272653789251e-05 | 4.49462344758895e-05 | SMC4/TOP2A/DUSP1/KIF11/NDC80/SPDL1/ATM             | 7 | 0.292887029288703 |

|            |    |            |                                                |      |           |                          |                          |                          |                                                               |   |                       |
|------------|----|------------|------------------------------------------------|------|-----------|--------------------------|--------------------------|--------------------------|---------------------------------------------------------------|---|-----------------------|
| GO:0045930 | BP | GO:0045930 | negative regulation of mitotic cell cycle      | 7/42 | 246/18903 | 1.06206615<br>12161e-06  | 7.90546630<br>818244e-05 | 5.21554682<br>038844e-05 | DUSP1/PLK2<br>/NDC80/SPD<br>L1/RGCC/AT<br>M/CDK2              | 7 | 0.28455284<br>5528455 |
| GO:0045787 | BP | GO:0045787 | positive regulation of cell cycle              | 8/42 | 362/18903 | 1.11934192<br>77526e-06  | 7.98463908<br>463518e-05 | 5.26778021<br>262516e-05 | SMC4/INSR/<br>MARK4/MSX1<br>/NDC80/PAF<br>AH1B1/RGCC<br>/EDN1 | 8 | 0.22099447<br>5138122 |
| GO:0040001 | BP | GO:0040001 | establishment of mitotic spindle localization  | 4/42 | 38/18903  | 1.47080629<br>589991e-06 | 0.00010072<br>0815143226 | 6.64494802<br>316045e-05 | CLASP2/NDC<br>80/SPDL1/P<br>FAH1B1                            | 4 | 1.05263157<br>894737  |
| GO:0051657 | BP | GO:0051657 | maintenance of organelle location              | 3/42 | 11/18903  | 1.66216378<br>34098e-06  | 0.00010944<br>7092199907 | 7.22065481<br>618913e-05 | UVRAG/PAFA<br>H1B1/ASPM                                       | 3 | 2.72727272<br>727273  |
| GO:1901988 | BP | GO:1901988 | negative regulation of cell cycle phase        | 7/42 | 272/18903 | 2.07388561<br>394863e-06 | 0.00013149<br>9710040002 | 8.67555268<br>525099e-05 | DUSP1/PLK2<br>/NDC80/SPD<br>L1/RGCC/AT<br>M/CDK2              | 7 | 0.25735294<br>1176471 |
| GO:0007099 | BP | GO:0007099 | centriole replication                          | 4/42 | 42/18903  | 2.21596614<br>504508e-06 | 0.00013549<br>0501439899 | 8.93884087<br>832093e-05 | PLK2/CEP72<br>/CETN2/CDK                                      | 4 | 0.95238095<br>2380952 |
| GO:2001251 | BP | GO:2001251 | negative regulation of chromosome organization | 5/42 | 97/18903  | 2.34680480<br>565631e-06 | 0.00013854<br>2407837366 | 9.14018713<br>781931e-05 | TOP2A/DUSP<br>1/NDC80/SP<br>DL1/ATM                           | 5 | 0.51546391<br>7525773 |

|            |    |            |                                                                                                                     |      |           |                      |                      |                      |                                     |   |                   |
|------------|----|------------|---------------------------------------------------------------------------------------------------------------------|------|-----------|----------------------|----------------------|----------------------|-------------------------------------|---|-------------------|
| GO:0042770 | BP | GO:0042770 | signal transduction in response to DNA meiotic chromosome segregation mitotic spindle assembly checkpoint signaling | 6/42 | 181/18903 | 2.79481246654701e-06 | 0.000155593644912313 | 0.000102651242616153 | GADD45A/PLK2/MSX1/NDK1/ATM/CDK2     | 6 | 0.331491712707182 |
| GO:0045132 | BP | GO:0045132 | meiotic chromosome segregation mitotic spindle assembly checkpoint signaling                                        | 5/42 | 101/18903 | 2.86561586251618e-06 | 0.000155593644912313 | 0.000102651242616153 | SMC4/TOP2A/RMI1/CCNB1IP1/ATM        | 5 | 0.495049504950495 |
| GO:0007094 | BP | GO:0007094 | spindle assembly checkpoint signaling                                                                               | 4/42 | 46/18903  | 3.20998414079503e-06 | 0.000155593644912313 | 0.000102651242616153 | DUSP1/NDC80/SPDL1/ATM               | 4 | 0.869565217391304 |
| GO:0071173 | BP | GO:0071173 | spindle assembly checkpoint signaling                                                                               | 4/42 | 46/18903  | 3.20998414079503e-06 | 0.000155593644912313 | 0.000102651242616153 | DUSP1/NDC80/SPDL1/ATM               | 4 | 0.869565217391304 |
| GO:0071174 | BP | GO:0071174 | mitotic spindle assembly checkpoint signaling                                                                       | 4/42 | 46/18903  | 3.20998414079503e-06 | 0.000155593644912313 | 0.000102651242616153 | DUSP1/NDC80/SPDL1/ATM               | 4 | 0.869565217391304 |
| GO:0098534 | BP | GO:0098534 | centriole assembly                                                                                                  | 4/42 | 46/18903  | 3.20998414079503e-06 | 0.000155593644912313 | 0.000102651242616153 | PLK2/CEP72/CETN2/CDK                | 4 | 0.869565217391304 |
| GO:0000075 | BP | GO:0000075 | cell cycle checkpoint signaling                                                                                     | 6/42 | 186/18903 | 3.27182898180097e-06 | 0.000155593644912313 | 0.000102651242616153 | DUSP1/PLK2/NDC80/SPDL1/ATM/CDK      | 6 | 0.32258064516129  |
| GO:0000910 | BP | GO:0000910 | cytokinesis                                                                                                         | 6/42 | 187/18903 | 3.37475687648499e-06 | 0.000156150912771413 | 0.000103018894124279 | CEP55/CUL7/PLK2/SHCBP1L/UVRAG/CETN2 | 6 | 0.320855614973262 |
| GO:0031577 | BP | GO:0031577 | spindle assembly checkpoint signaling                                                                               | 4/42 | 47/18903  | 3.50294920855646e-06 | 0.00015781708013286  | 0.000104118130215542 | DUSP1/NDC80/SPDL1/ATM               | 4 | 0.851063829787234 |

|            |    |            |                                                                    |      |           |                      |                      |                      |                             |   |                   |
|------------|----|------------|--------------------------------------------------------------------|------|-----------|----------------------|----------------------|----------------------|-----------------------------|---|-------------------|
| GO:2001252 | BP | GO:2001252 | positive regulation of chromosome organization                     | 5/42 | 106/18903 | 3.6365080276076e-06  | 0.000159633378032416 | 0.000105316413323157 | SMC4/SHCBP1L/MAPK1/ATM/CDK2 | 5 | 0.471698113207547 |
| GO:0045841 | BP | GO:0045841 | negative regulation of mitotic metaphase/anaphase transition       | 4/42 | 48/18903  | 3.81525850764782e-06 | 0.000163293064127327 | 0.000107730852071213 | DUSP1/NDC80/SPDL1/ATM       | 4 | 0.833333333333333 |
| GO:1902100 | BP | GO:1902100 | negative regulation of metaphase/anaphase transition of cell cycle | 4/42 | 50/18903  | 4.50114389104504e-06 | 0.000185518866087016 | 0.000122394087131928 | DUSP1/NDC80/SPDL1/ATM       | 4 | 0.8               |
| GO:1905818 | BP | GO:1905818 | regulation of chromosome separation                                | 5/42 | 111/18903 | 4.56166581884539e-06 | 0.000185518866087016 | 0.000122394087131928 | SMC4/DUSP1/NDC80/SPDL1/ATM  | 5 | 0.45045045045045  |
| GO:0033046 | BP | GO:0033046 | negative regulation of sister chromatid segregation                | 4/42 | 51/18903  | 4.8763720642031e-06  | 0.000185518866087016 | 0.000122394087131928 | DUSP1/NDC80/SPDL1/ATM       | 4 | 0.784313725490196 |

|            |    |            |                                                             |      |           |                      |                      |                      |                                      |   |                   |
|------------|----|------------|-------------------------------------------------------------|------|-----------|----------------------|----------------------|----------------------|--------------------------------------|---|-------------------|
| GO:0033048 | BP | GO:0033048 | negative regulation of mitotic sister chromatid segregation | 4/42 | 51/18903  | 4.8763720642031e-06  | 0.000185518866087016 | 0.000122394087131928 | DUSP1/NDC80/SPDL1/ATM                | 4 | 0.784313725490196 |
| GO:2000816 | BP | GO:2000816 | negative regulation of mitotic sister chromatid separation  | 4/42 | 51/18903  | 4.8763720642031e-06  | 0.000185518866087016 | 0.000122394087131928 | DUSP1/NDC80/SPDL1/ATM                | 4 | 0.784313725490196 |
| GO:0000070 | BP | GO:0000070 | mitotic sister chromatid segregation                        | 6/42 | 204/18903 | 5.5698344392176e-06  | 0.000202970983289068 | 0.00013390793474494  | SMC4/DUSP1/KIF11/NDC80/SPDL1/ATM     | 6 | 0.294117647058824 |
| GO:0051985 | BP | GO:0051985 | negative regulation of chromosome segregation               | 4/42 | 53/18903  | 5.69563332026574e-06 | 0.000202970983289068 | 0.00013390793474494  | DUSP1/NDC80/SPDL1/ATM                | 4 | 0.754716981132075 |
| GO:1905819 | BP | GO:1905819 | negative regulation of chromosome separation                | 4/42 | 53/18903  | 5.69563332026574e-06 | 0.000202970983289068 | 0.00013390793474494  | DUSP1/NDC80/SPDL1/ATM                | 4 | 0.754716981132075 |
| GO:0010948 | BP | GO:0010948 | negative regulation of cell cycle process                   | 7/42 | 318/18903 | 5.80933304974552e-06 | 0.000202970983289068 | 0.00013390793474494  | DUSP1/PLK2/NDC80/SPDL1/RGCC/ATM/CDK2 | 7 | 0.220125786163522 |

|            |    |            |                                                 |      |           |                      |                      |                      |                                          |   |                   |
|------------|----|------------|-------------------------------------------------|------|-----------|----------------------|----------------------|----------------------|------------------------------------------|---|-------------------|
| GO:0051293 | BP | GO:0051293 | establishment of spindle localization           | 4/42 | 54/18903  | 6.14140091364182e-06 | 0.000210281567283096 | 0.000138731014322898 | CLASP2/NDC80/SPDL1/PFAH1B1               | 4 | 0.740740740740741 |
| GO:0033047 | BP | GO:0033047 | regulation of sister chromatid segregation      | 4/42 | 56/18903  | 7.10964705430283e-06 | 0.000234071456864739 | 0.000154426139458845 | DUSP1/NDC80/SPDL1/ATM                    | 4 | 0.714285714285714 |
| GO:0045839 | BP | GO:0045839 | negative regulation of mitotic nuclear division | 4/42 | 56/18903  | 7.10964705430283e-06 | 0.000234071456864739 | 0.000154426139458845 | DUSP1/NDC80/SPDL1/ATM                    | 4 | 0.714285714285714 |
| GO:0044772 | BP | GO:0044772 | mitotic cell cycle phase transition             | 8/42 | 473/18903 | 8.09405326590515e-06 | 0.000254815473732932 | 0.000168111782658286 | DUSP1/PLK2/CLASP2/NDC80/SPDL1/RGCC/ATM/C | 8 | 0.169133192389006 |
| GO:0007131 | BP | GO:0007131 | reciprocal meiotic recombination                | 4/42 | 58/18903  | 8.18624477529865e-06 | 0.000254815473732932 | 0.000168111782658286 | TOP2A/RMI1/CCNB1IP1/ATM                  | 4 | 0.689655172413793 |
| GO:0140527 | BP | GO:0140527 | reciprocal homologous recombination             | 4/42 | 58/18903  | 8.18624477529865e-06 | 0.000254815473732932 | 0.000168111782658286 | TOP2A/RMI1/CCNB1IP1/ATM                  | 4 | 0.689655172413793 |
| GO:0051785 | BP | GO:0051785 | positive regulation of nuclear division         | 4/42 | 59/18903  | 8.7675006550735e-06  | 0.000268035020026533 | 0.000176833236896501 | INSR/MSX1/RGCC/EDN1                      | 4 | 0.677966101694915 |
| GO:0007127 | BP | GO:0007127 | meiosis I                                       | 5/42 | 131/18903 | 1.02521036666504e-05 | 0.000307922832935182 | 0.000203148794724207 | TOP2A/RMI1/NDC80/CCNB1IP1/ATM            | 5 | 0.381679389312977 |

|            |    |            |                                                   |      |           |                      |                      |                      |                                      |   |                   |
|------------|----|------------|---------------------------------------------------|------|-----------|----------------------|----------------------|----------------------|--------------------------------------|---|-------------------|
| GO:0051983 | BP | GO:0051983 | regulation of chromosome segregation mitotic      | 5/42 | 132/18903 | 1.06383503332038e-05 | 0.000314014754662842 | 0.000207167874909757 | SMC4/DUSP1/NDC80/SPDL1/ATM           | 5 | 0.378787878787879 |
| GO:0007052 | BP | GO:0007052 | spindle organization                              | 5/42 | 133/18903 | 1.1035882075469e-05  | 0.000320227629037339 | 0.00021126675231005  | PLK2/SUN2/KIF11/CLASP2/NDC80         | 5 | 0.37593984962406  |
| GO:0051784 | BP | GO:0051784 | negative regulation of nuclear division           | 4/42 | 63/18903  | 1.14012758279057e-05 | 0.00032531640362291  | 0.000214624016900752 | DUSP1/NDC80/SPDL1/ATM                | 4 | 0.634920634920635 |
| GO:1901990 | BP | GO:1901990 | regulation of mitotic cell cycle phase transition | 7/42 | 354/18903 | 1.16839773956547e-05 | 0.000327917529530507 | 0.000216340081890208 | DUSP1/PLK2/NDC80/SPDL1/RGCC/ATM/CDK2 | 7 | 0.19774011299435  |
| GO:0051445 | BP | GO:0051445 | regulation of meiotic cell cycle meiosis I        | 4/42 | 64/18903  | 1.2141826485761e-05  | 0.000335271079735852 | 0.00022119150796641  | DUSP1/INSR/MSX1/ASPM                 | 4 | 0.625             |
| GO:0061982 | BP | GO:0061982 | cell cycle process                                | 5/42 | 137/18903 | 1.27435727248166e-05 | 0.000345535914410717 | 0.000227963622825073 | TOP2A/RMI1/NDC80/CCNB1IP1/ATM        | 5 | 0.364963503649635 |
| GO:0035825 | BP | GO:0035825 | homologous recombination                          | 4/42 | 65/18903  | 1.29172304452604e-05 | 0.000345535914410717 | 0.000227963622825073 | TOP2A/RMI1/CCNB1IP1/ATM              | 4 | 0.615384615384615 |
| GO:0048762 | BP | GO:0048762 | mesenchymal cell differentiation                  | 6/42 | 252/18903 | 1.85566861303676e-05 | 0.000488754563925989 | 0.00032245059462161  | CUL7/MSX1/CLASP2/MAPK1/RGCC/EDN1     | 6 | 0.238095238095238 |

|            |    |            |                                                                                                                                                                                                                                                                                                                                                                                               |      |           |                          |                          |                          |                         |   |                       |
|------------|----|------------|-----------------------------------------------------------------------------------------------------------------------------------------------------------------------------------------------------------------------------------------------------------------------------------------------------------------------------------------------------------------------------------------------|------|-----------|--------------------------|--------------------------|--------------------------|-------------------------|---|-----------------------|
| GO:0030330 | BP | GO:0030330 | DNA damage<br>response,<br>signal<br>transduction<br>by p53<br>class<br>mediator<br>positive<br>regulation<br>of cell<br>cycle<br>process<br>regulation<br>of protein<br>serine/thr<br>eonine<br>kinase<br>activity<br>female<br>gamete<br>generation<br>negative<br>regulation<br>of cell<br>cycle<br>epithelial<br>to<br>mesenchymal<br>mitotic G1<br>DNA damage<br>checkpoint<br>signaling | 4/42 | 74/18903  | 2.16374875<br>266673e-05 | 0.00056126<br>3312812945 | 0.00037028<br>746596673  | PLK2/MSX1/<br>NDRG1/ATM | 4 | 0.54054054<br>0540541 |
| GO:0090068 | BP | GO:0090068 | SMC4/INSR/<br>MSX1/NDC80<br>/RGCC/EDN1                                                                                                                                                                                                                                                                                                                                                        | 6/42 | 260/18903 | 2.21335791<br>471388e-05 | 0.00056556<br>2499998531 | 0.00037312<br>3808717673 |                         | 6 | 0.23076923<br>0769231 |
| GO:0071900 | BP | GO:0071900 | GADD45A/CC<br>NL1/DUSP1/<br>INSR/UVRAG<br>/RGCC/EDN1                                                                                                                                                                                                                                                                                                                                          | 7/42 | 395/18903 | 2.36790984<br>379244e-05 | 0.00059615<br>6125378333 | 0.00039330<br>7625756857 |                         | 7 | 0.17721518<br>9873418 |
| GO:0007292 | BP | GO:0007292 | TOP2A/NDC8<br>0/EDN1/ASP<br>M/ATM                                                                                                                                                                                                                                                                                                                                                             | 5/42 | 159/18903 | 2.61551238<br>365806e-05 | 0.00064895<br>0318959797 | 0.00042813<br>8030154858 |                         | 5 | 0.31446540<br>8805031 |
| GO:0045786 | BP | GO:0045786 | DUSP1/PLK2<br>/NDC80/SPD<br>L1/RGCC/AT<br>M/CDK2                                                                                                                                                                                                                                                                                                                                              | 7/42 | 405/18903 | 2.77874868<br>204899e-05 | 0.00067960<br>2534809695 | 0.00044836<br>0501629859 |                         | 7 | 0.17283950<br>6172839 |
| GO:0001837 | BP | GO:0001837 | CUL7/MSX1/<br>CLASP2/RGC<br>C/EDN1                                                                                                                                                                                                                                                                                                                                                            | 5/42 | 169/18903 | 3.50399166<br>81465e-05  | 0.00084490<br>615998124  | 0.00055741<br>7799840058 |                         | 5 | 0.29585798<br>816568  |
| GO:0031571 | BP | GO:0031571 | PLK2/ATM/C<br>DK2                                                                                                                                                                                                                                                                                                                                                                             | 3/42 | 29/18903  | 3.57983601<br>054998e-05 | 0.00085120<br>545139744  | 0.00056157<br>3689959083 |                         | 3 | 1.03448275<br>862069  |

|            |    |            |                                                                                                                               |      |          |                          |                         |                          |                               |   |                       |
|------------|----|------------|-------------------------------------------------------------------------------------------------------------------------------|------|----------|--------------------------|-------------------------|--------------------------|-------------------------------|---|-----------------------|
| G0:0044819 | BP | G0:0044819 | mitotic<br>G1/S<br>transition<br>checkpoint<br>signaling<br>centrosome                                                        | 3/42 | 30/18903 | 3.97144963<br>964963e-05 | 0.00093138<br>654562742 | 0.00061447<br>2309061868 | PLK2/ATM/C<br>DK2             | 3 | 1                     |
| G0:0051642 | BP | G0:0051642 | localizati<br>on<br>protein                                                                                                   | 3/42 | 32/18903 | 4.83683978<br>941881e-05 | 0.00110408<br>929593133 | 0.00072841<br>1100918791 | SUN2/PFAFH<br>1B1/ASPM        | 3 | 0.9375                |
| G0:0071539 | BP | G0:0071539 | localizati<br>on to<br>centrosome<br>regulation<br>of mitotic<br>metaphase/<br>anaphase<br>transition<br>establishm<br>ent of | 3/42 | 32/18903 | 4.83683978<br>941881e-05 | 0.00110408<br>929593133 | 0.00072841<br>1100918791 | MARK4/CEP7<br>2/SNX10         | 3 | 0.9375                |
| G0:0030071 | BP | G0:0030071 | mitotic<br>spindle<br>orientatio<br>female<br>meiotic<br>nuclear<br>division<br>microtubul<br>e                               | 4/42 | 92/18903 | 5.10461067<br>68137e-05  | 0.00114988<br>072088224 | 0.00075862<br>1503631732 | DUSP1/NDC8<br>0/SPDL1/AT<br>M | 4 | 0.43478260<br>8695652 |
| G0:0000132 | BP | G0:0000132 | mitotic<br>spindle<br>orientatio<br>female<br>meiotic<br>nuclear<br>division<br>microtubul<br>e                               | 3/42 | 33/18903 | 5.31230437<br>69829e-05  | 0.00115122<br>342954364 | 0.00075950<br>734130615  | NDC80/SPDL<br>1/PFAFH1B1      | 3 | 0.90909090<br>9090909 |
| G0:0007143 | BP | G0:0007143 | organizing<br>center<br>localizati                                                                                            | 3/42 | 33/18903 | 5.31230437<br>69829e-05  | 0.00115122<br>342954364 | 0.00075950<br>734130615  | TOP2A/NDC8<br>0/ATM           | 3 | 0.90909090<br>9090909 |
| G0:0061842 | BP | G0:0061842 | organizing<br>center<br>localizati                                                                                            | 3/42 | 33/18903 | 5.31230437<br>69829e-05  | 0.00115122<br>342954364 | 0.00075950<br>734130615  | SUN2/PFAFH<br>1B1/ASPM        | 3 | 0.90909090<br>9090909 |

|            |    |            |                                                                                                                                                                                                                                                                         |      |           |                      |                     |                      |                                      |   |                   |
|------------|----|------------|-------------------------------------------------------------------------------------------------------------------------------------------------------------------------------------------------------------------------------------------------------------------------|------|-----------|----------------------|---------------------|----------------------|--------------------------------------|---|-------------------|
| GO:1901987 | BP | GO:1901987 | regulation of cell cycle phase metaphase/anaphase transition of mitotic cell cycle regulation of metaphase/anaphase transition of cell cycle protein localization on to microtubule organizing mesenchyme development regulation of mitotic sister chromatid separation | 7/42 | 453/18903 | 5.65817474723909e-05 | 0.00119992595376103 | 0.000791638310615831 | DUSP1/PLK2/NDC80/SPDL1/RGCC/ATM/CDK2 | 7 | 0.154525386313466 |
| GO:0007091 | BP | GO:0007091 | regulation of metaphase/anaphase transition of mitotic cell cycle regulation of metaphase/anaphase transition of cell cycle protein localization on to microtubule organizing mesenchyme development regulation of mitotic sister chromatid separation                  | 4/42 | 95/18903  | 5.78802336483229e-05 | 0.00119992595376103 | 0.000791638310615831 | DUSP1/NDC80/SPDL1/ATM                | 4 | 0.421052631578947 |
| GO:1902099 | BP | GO:1902099 | regulation of metaphase/anaphase transition of cell cycle protein localization on to microtubule organizing mesenchyme development regulation of mitotic sister chromatid separation                                                                                    | 4/42 | 95/18903  | 5.78802336483229e-05 | 0.00119992595376103 | 0.000791638310615831 | DUSP1/NDC80/SPDL1/ATM                | 4 | 0.421052631578947 |
| GO:1905508 | BP | GO:1905508 | regulation of metaphase/anaphase transition of cell cycle protein localization on to microtubule organizing mesenchyme development regulation of mitotic sister chromatid separation                                                                                    | 3/42 | 34/18903  | 5.81739802349098e-05 | 0.00119992595376103 | 0.000791638310615831 | MARK4/CEP72/SNX10                    | 3 | 0.882352941176471 |
| GO:0060485 | BP | GO:0060485 | regulation of metaphase/anaphase transition of cell cycle protein localization on to microtubule organizing mesenchyme development regulation of mitotic sister chromatid separation                                                                                    | 6/42 | 313/18903 | 6.23810989071452e-05 | 0.00127138620629801 | 0.000838783447711363 | CUL7/MSX1/CLASP2/MAPK1/RGCC/ED       | 6 | 0.191693290734824 |
| GO:0010965 | BP | GO:0010965 | regulation of metaphase/anaphase transition of cell cycle protein localization on to microtubule organizing mesenchyme development regulation of mitotic sister chromatid separation                                                                                    | 4/42 | 98/18903  | 6.53593924013455e-05 | 0.00129407133239186 | 0.000853749716955527 | DUSP1/NDC80/SPDL1/ATM                | 4 | 0.408163265306122 |

|            |    |            |                                                              |      |           |                          |                         |                          |                                                   |   |                       |
|------------|----|------------|--------------------------------------------------------------|------|-----------|--------------------------|-------------------------|--------------------------|---------------------------------------------------|---|-----------------------|
| GO:0044784 | BP | GO:0044784 | metaphase/<br>anaphase<br>transition<br>of cell<br>cycle     | 4/42 | 98/18903  | 6.53593924<br>013455e-05 | 0.00129407<br>133239186 | 0.00085374<br>9716955527 | DUSP1/NDC8<br>O/SPDL1/AT<br>M                     | 4 | 0.40816326<br>5306122 |
| GO:0007281 | BP | GO:0007281 | germ cell<br>developmen<br>t                                 | 6/42 | 316/18903 | 6.57618025<br>222501e-05 | 0.00129407<br>133239186 | 0.00085374<br>9716955527 | CEP57/PAFA<br>H1B1/EDN1/<br>CCNB1IP1/A<br>SPM/ATM | 6 | 0.18987341<br>7721519 |
| GO:0051306 | BP | GO:0051306 | mitotic<br>sister<br>chromatid<br>separation<br>regulation   | 4/42 | 101/18903 | 7.35199977<br>205174e-05 | 0.00143029<br>813747188 | 0.00094362<br>3894187981 | DUSP1/NDC8<br>O/SPDL1/AT<br>M                     | 4 | 0.39603960<br>3960396 |
| GO:0033045 | BP | GO:0033045 | of sister<br>chromatid<br>segregatio<br>establishm<br>ent of | 4/42 | 107/18903 | 9.20344853<br>242857e-05 | 0.00177037<br>12233166  | 0.00116798<br>347431057  | DUSP1/NDC8<br>O/SPDL1/AT<br>M                     | 4 | 0.37383177<br>5700935 |
| GO:0051294 | BP | GO:0051294 | spindle<br>orientatio<br>positive<br>regulation              | 3/42 | 40/18903  | 9.51626783<br>010865e-05 | 0.00181020<br>561390511 | 0.00119426<br>37873341   | NDC80/SPDL<br>1/PAFAH1B1                          | 3 | 0.75                  |
| GO:0045840 | BP | GO:0045840 | of mitotic<br>nuclear<br>division<br>negative<br>regulation  | 3/42 | 44/18903  | 0.00012677<br>8247231018 | 0.00238510<br>284900553 | 0.00157354<br>608766781  | INSR/RGCC/<br>EDN1                                | 3 | 0.68181818<br>1818182 |
| GO:0010639 | BP | GO:0010639 | of<br>organelle<br>organizati<br>on                          | 6/42 | 366/18903 | 0.00014722<br>5515352609 | 0.00273967<br>480743117 | 0.00180747<br>114385984  | TOP2A/DUSP<br>1/CLASP2/N<br>DC80/SPDL1<br>/ATM    | 6 | 0.16393442<br>6229508 |

|            |    |            |                                                                                                                                                                 |      |           |                      |                     |                     |                                     |   |                   |
|------------|----|------------|-----------------------------------------------------------------------------------------------------------------------------------------------------------------|------|-----------|----------------------|---------------------|---------------------|-------------------------------------|---|-------------------|
| GO:0007163 | BP | GO:0007163 | establishment or maintenance of cell polarity regulation of leukocyte chemotaxis                                                                                | 5/42 | 234/18903 | 0.000163078053956924 | 0.00300203901477692 | 0.00198056312275924 | CLASP2/NDC80/SPDL1/PFAAH1B1/CYP26B1 | 5 | 0.213675213675214 |
| GO:0002688 | BP | GO:0002688 | spindle assembly                                                                                                                                                | 4/42 | 127/18903 | 0.000178484580296053 | 0.00325069788794513 | 0.00214461315406119 | DUSP1/MAPK1/EDN1/MTUS1              | 4 | 0.31496062992126  |
| GO:0051225 | BP | GO:0051225 | myeloid leukocyte migration positive regulation of extracellular matrix assembly regulation of protein localization to centrosome male meiotic nuclear division | 4/42 | 128/18903 | 0.00018394670288727  | 0.00331491321413691 | 0.00218697852851015 | KIF11/CLASP2/NDC80/ASPM             | 4 | 0.3125            |
| GO:0097529 | BP | GO:0097529 | myeloid leukocyte migration positive regulation of extracellular matrix assembly regulation of protein localization to centrosome male meiotic nuclear division | 5/42 | 242/18903 | 0.000190698159311496 | 0.003400783841055   | 0.00224363075593459 | DUSP1/MAPK1/PFAAH1B1/EDN1/MTUS      | 5 | 0.206611570247934 |
| GO:1901203 | BP | GO:1901203 | myeloid leukocyte migration positive regulation of extracellular matrix assembly regulation of protein localization to centrosome male meiotic nuclear division | 2/42 | 10/18903  | 0.000214439226597935 | 0.00374612199934352 | 0.00247146391127373 | CLASP2/RGC                          | 2 | 2                 |
| GO:1904779 | BP | GO:1904779 | myeloid leukocyte migration positive regulation of extracellular matrix assembly regulation of protein localization to centrosome male meiotic nuclear division | 2/42 | 10/18903  | 0.000214439226597935 | 0.00374612199934352 | 0.00247146391127373 | MARK4/CEP72                         | 2 | 2                 |
| GO:0007140 | BP | GO:0007140 | myeloid leukocyte migration positive regulation of extracellular matrix assembly regulation of protein localization to centrosome male meiotic nuclear division | 3/42 | 53/18903  | 0.000221149970118703 | 0.00382433079639615 | 0.00252306132841433 | SHCBP1L/CYP26B1/ATM                 | 3 | 0.566037735849057 |

|            |    |            |                                                     |      |           |                          |                         |                         |                                      |   |                       |
|------------|----|------------|-----------------------------------------------------|------|-----------|--------------------------|-------------------------|-------------------------|--------------------------------------|---|-----------------------|
| GO:0032886 | BP | GO:0032886 | regulation of microtubule-based process             | 5/42 | 252/18903 | 0.00023009<br>5858058208 | 0.00392413<br>114233783 | 0.00258890<br>353893783 | CCNL1/MARK4/PLK2/CLASP2/PAFAH1B1     | 5 | 0.19841269<br>8412698 |
| GO:0046605 | BP | GO:0046605 | regulation of centrosome cycle                      | 3/42 | 54/18903  | 0.00023379<br>7533013118 | 0.00392413<br>114233783 | 0.00258890<br>353893783 | CCNL1/MARK4/PLK2                     | 3 | 0.55555555<br>5555556 |
| GO:0072698 | BP | GO:0072698 | protein localization on to microtubule cytoskeleton | 3/42 | 54/18903  | 0.00023379<br>7533013118 | 0.00392413<br>114233783 | 0.00258890<br>353893783 | MARK4/CEP72/SNX10                    | 3 | 0.55555555<br>5555556 |
| GO:0044380 | BP | GO:0044380 | protein localization on to cytoskeleton             | 3/42 | 58/18903  | 0.00028905<br>2066681891 | 0.00480443<br>823455725 | 0.00316967<br>672508604 | MARK4/CEP72/SNX10                    | 3 | 0.51724137<br>9310345 |
| GO:0090596 | BP | GO:0090596 | sensory organ morphogenesis                         | 5/42 | 272/18903 | 0.00032723<br>9035929609 | 0.00538685<br>797607202 | 0.00355392<br>191854727 | ATF4/MSX1/MAPK1/CYP26B1/EDN1         | 5 | 0.18382352<br>9411765 |
| GO:0030010 | BP | GO:0030010 | establishment of cell                               | 4/42 | 150/18903 | 0.00033722<br>9606710385 | 0.00549844<br>844464933 | 0.00362754<br>253634329 | NDC80/SPDL1/PAFAH1B1/CYP26B1         | 4 | 0.26666666<br>6666667 |
| GO:0051656 | BP | GO:0051656 | establishment of organelle localization             | 6/42 | 437/18903 | 0.00038223<br>4748156135 | 0.00617345<br>178154059 | 0.00407286<br>876635087 | SUN2/CLASP2/NDC80/SPDL1/PAFAH1B1/ATM | 6 | 0.13729977<br>1167048 |

|            |    |            |                                                                                                                                                                                                                                                                                               |      |           |            |            |            |                               |   |                   |
|------------|----|------------|-----------------------------------------------------------------------------------------------------------------------------------------------------------------------------------------------------------------------------------------------------------------------------------------------|------|-----------|------------|------------|------------|-------------------------------|---|-------------------|
| GO:0036294 | BP | GO:0036294 | cellular response to decreased oxygen regulation of epithelial cell migration telomere maintenance via telomerase meiotic spindle organization on cardiac neural crest cell differentiation involved in heart development cardiac neural crest cell development involved in heart development | 4/42 | 159/18903 | 0.00042060 | 0.00672975 | 0.00443988 | ATF4/RGCC/EDN1/NDRG1          | 4 | 0.251572327044025 |
| GO:0010632 | BP | GO:0010632 | cellular response to decreased oxygen regulation of epithelial cell migration telomere maintenance via telomerase meiotic spindle organization on cardiac neural crest cell differentiation involved in heart development cardiac neural crest cell development involved in heart development | 5/42 | 292/18903 | 0.00045276 | 0.00717719 | 0.00473508 | GADD45A/PLK2/CLASP2/RGCC/EDN1 | 5 | 0.171232876712329 |
| GO:0007004 | BP | GO:0007004 | cellular response to decreased oxygen regulation of epithelial cell migration telomere maintenance via telomerase meiotic spindle organization on cardiac neural crest cell differentiation involved in heart development cardiac neural crest cell development involved in heart development | 3/42 | 69/18903  | 0.00048255 | 0.00757921 | 0.00500030 | MAPK1/ATM/RPA1                | 3 | 0.434782608695652 |
| GO:0000212 | BP | GO:0000212 | cellular response to decreased oxygen regulation of epithelial cell migration telomere maintenance via telomerase meiotic spindle organization on cardiac neural crest cell differentiation involved in heart development cardiac neural crest cell development involved in heart development | 2/42 | 15/18903  | 0.00049684 | 0.00759460 | 0.00501045 | NDC80/ASPM                    | 2 | 1.33333333333333  |
| GO:0061307 | BP | GO:0061307 | cellular response to decreased oxygen regulation of epithelial cell migration telomere maintenance via telomerase meiotic spindle organization on cardiac neural crest cell differentiation involved in heart development cardiac neural crest cell development involved in heart development | 2/42 | 15/18903  | 0.00049684 | 0.00759460 | 0.00501045 | MAPK1/EDN1                    | 2 | 1.33333333333333  |
| GO:0061308 | BP | GO:0061308 | cellular response to decreased oxygen regulation of epithelial cell migration telomere maintenance via telomerase meiotic spindle organization on cardiac neural crest cell differentiation involved in heart development cardiac neural crest cell development involved in heart development | 2/42 | 15/18903  | 0.00049684 | 0.00759460 | 0.00501045 | MAPK1/EDN1                    | 2 | 1.33333333333333  |

|            |    |            |                                                                                                                                                                                         |      |           |                          |                         |                         |                                  |   |                       |
|------------|----|------------|-----------------------------------------------------------------------------------------------------------------------------------------------------------------------------------------|------|-----------|--------------------------|-------------------------|-------------------------|----------------------------------|---|-----------------------|
| GO:0043517 | BP | GO:0043517 | positive regulation of DNA damage response, signal transduction by p53 class mediator regulation of                                                                                     | 2/42 | 16/18903  | 0.00056702<br>1211169682 | 0.00851526<br>590809206 | 0.00561785<br>558250294 | MSX1/ATM                         | 2 | 1.25                  |
| GO:1901201 | BP | GO:1901201 | extracellular matrix assembly signal transduction by p53 class mediator response to decreased oxygen positive regulation of DNA biosynthetic process cellular response to oxygen levels | 2/42 | 16/18903  | 0.00056702<br>1211169682 | 0.00851526<br>590809206 | 0.00561785<br>558250294 | CLASP2/RGC<br>C                  | 2 | 1.25                  |
| GO:0072331 | BP | GO:0072331 | transduction by p53 class mediator response to decreased oxygen positive regulation of DNA biosynthetic process cellular response to oxygen levels                                      | 4/42 | 173/18903 | 0.00057819<br>3925796033 | 0.00860754<br>78344592  | 0.00567873<br>759614776 | PLK2/MSX1/<br>NDRG1/ATM          | 4 | 0.23121387<br>283237  |
| GO:0036293 | BP | GO:0036293 | positive regulation of DNA biosynthetic process cellular response to oxygen levels                                                                                                      | 5/42 | 309/18903 | 0.00058551<br>9064845863 | 0.00864145<br>378462171 | 0.00570110<br>668402551 | ATF4/RGCC/<br>EDN1/NDRG1<br>/ATM | 5 | 0.16181229<br>7734628 |
| GO:2000573 | BP | GO:2000573 | positive regulation of DNA biosynthetic process cellular response to oxygen levels                                                                                                      | 3/42 | 74/18903  | 0.00059245<br>0671617029 | 0.00866902<br>179323379 | 0.00571929<br>438277168 | MAPK1/RGCC<br>/ATM               | 3 | 0.40540540<br>5405405 |
| GO:0071453 | BP | GO:0071453 | positive regulation of DNA biosynthetic process cellular response to oxygen levels                                                                                                      | 4/42 | 175/18903 | 0.00060370<br>3467142558 | 0.00875881<br>640464457 | 0.00577853<br>541698452 | ATF4/RGCC/<br>EDN1/NDRG1         | 4 | 0.22857142<br>8571429 |

|            |    |            |                                                   |      |           |                      |                     |                     |                                        |   |                   |
|------------|----|------------|---------------------------------------------------|------|-----------|----------------------|---------------------|---------------------|----------------------------------------|---|-------------------|
| GO:0006278 | BP | GO:0006278 | RNA-templated DNA biosynthetic process            | 3/42 | 75/18903  | 0.000616185291372587 | 0.00885404752146653 | 0.00584136312748007 | MAPK1/ATM/RPA1                         | 3 | 0.4               |
| GO:0018105 | BP | GO:0018105 | peptidyl-serine phosphorylation                   | 5/42 | 313/18903 | 0.00062061080757943  | 0.00885404752146653 | 0.00584136312748007 | GADD45A/PLK2/MAPK1/ATM/CDK2            | 5 | 0.159744408945687 |
| GO:0070192 | BP | GO:0070192 | chromosome organization                           | 3/42 | 76/18903  | 0.00064051966424921  | 0.00895604836264848 | 0.0059086570911964  | SMC4/CCNB1IP1/ATM                      | 3 | 0.394736842105263 |
| GO:0042481 | BP | GO:0042481 | involved in meiotic regulation of odontogenesis   | 2/42 | 17/18903  | 0.000641719131672179 | 0.00895604836264848 | 0.0059086570911964  | MSX1/EDN1                              | 2 | 1.17647058823529  |
| GO:0031503 | BP | GO:0031503 | protein-containing complex localization           | 4/42 | 178/18903 | 0.000643454409232338 | 0.00895604836264848 | 0.0059086570911964  | RPGR/CEP72/SSX2IP/ATM                  | 4 | 0.224719101123595 |
| GO:0001667 | BP | GO:0001667 | ameboidal-type cell migration                     | 6/42 | 492/18903 | 0.000714039426381156 | 0.00964227258135598 | 0.00636138617793591 | GADD45A/PLK2/CLASP2/PAFAH1B1/RGCC/EDN1 | 6 | 0.121951219512195 |
| GO:0000712 | BP | GO:0000712 | resolution of meiotic recombination intermediates | 2/42 | 18/18903  | 0.000720917576176148 | 0.00964227258135598 | 0.00636138617793591 | TOP2A/RMI1                             | 2 | 1.11111111111111  |

|            |    |            |                                                                                                                                               |      |           |                          |                         |                         |                        |   |                       |
|------------|----|------------|-----------------------------------------------------------------------------------------------------------------------------------------------|------|-----------|--------------------------|-------------------------|-------------------------|------------------------|---|-----------------------|
| GO:0006977 | BP | GO:0006977 | DNA damage response, signal transduction by p53 class mediator resulting in cell cycle arrest protein localization to kinetochor protein      | 2/42 | 18/18903  | 0.00072091<br>7576176148 | 0.00964227<br>258135598 | 0.00636138<br>617793591 | PLK2/ATM               | 2 | 1.11111111<br>111111  |
| GO:0034501 | BP | GO:0034501 | localization to kinetochor protein                                                                                                            | 2/42 | 18/18903  | 0.00072091<br>7576176148 | 0.00964227<br>258135598 | 0.00636138<br>617793591 | NDC80/SPDL<br>1        | 2 | 1.11111111<br>111111  |
| GO:1903083 | BP | GO:1903083 | localization to condensed chromosome regulation of G1/S transition of mitotic cell cycle telomere maintenance via telomere lengthenin mitotic | 2/42 | 18/18903  | 0.00072091<br>7576176148 | 0.00964227<br>258135598 | 0.00636138<br>617793591 | NDC80/SPDL<br>1        | 2 | 1.11111111<br>111111  |
| GO:2000045 | BP | GO:2000045 | transition of mitotic cell cycle telomere maintenance via telomere lengthenin mitotic                                                         | 4/42 | 185/18903 | 0.00074338<br>6174327865 | 0.00986571<br>418952949 | 0.00650879<br>938844389 | PLK2/RGCC/<br>ATM/CDK2 | 4 | 0.21621621<br>6216216 |
| GO:0010833 | BP | GO:0010833 | telomere lengthenin mitotic                                                                                                                   | 3/42 | 81/18903  | 0.00077140<br>1865651782 | 0.01008122<br>13282126  | 0.00665097<br>79175923  | MAPK1/ATM/<br>RPA1     | 3 | 0.37037037<br>037037  |
| GO:0044773 | BP | GO:0044773 | DNA damage checkpoint signaling                                                                                                               | 3/42 | 81/18903  | 0.00077140<br>1865651782 | 0.01008122<br>13282126  | 0.00665097<br>79175923  | PLK2/ATM/<br>DK2       | 3 | 0.37037037<br>037037  |

|            |    |            |                                             |      |           |                          |                        |                         |                              |   |                       |   |
|------------|----|------------|---------------------------------------------|------|-----------|--------------------------|------------------------|-------------------------|------------------------------|---|-----------------------|---|
| GO:0051303 | BP | GO:0051303 | establishment of chromosome localization    | 3/42 | 82/18903  | 0.00079946<br>2535643474 | 0.01034037<br>3328568  | 0.00682195<br>067729555 | NDC80/SPDL1/ATM              | 3 | 0.36585365<br>8536585 |   |
| GO:0006310 | BP | GO:0006310 | DNA recombination                           | 5/42 | 332/18903 | 0.00080935<br>1650717356 | 0.01034037<br>3328568  | 0.00682195<br>067729555 | TOP2A/RMI1/CCNB1IP1/ATM/RPA1 | 5 | 0.15060240<br>9638554 |   |
| GO:0018209 | BP | GO:0018209 | peptidyl-serine modification                | 5/42 | 332/18903 | 0.00080935<br>1650717356 | 0.01034037<br>3328568  | 0.00682195<br>067729555 | GADD45A/PLK2/MAPK1/ATM/CDK2  | 5 | 0.15060240<br>9638554 |   |
| GO:0051302 | BP | GO:0051302 | regulation of cell division                 | 4/42 | 190/18903 | 0.00082118<br>0065438504 | 0.01041377<br>97928201 | 0.00687037<br>980674865 | PLK2/UVRAG/CETN2/ASP M       | 4 | 0.21052631<br>5789474 |   |
| GO:0070482 | BP | GO:0070482 | response to oxygen levels                   | 5/42 | 337/18903 | 0.00086547<br>0925654818 | 0.01089475<br>16523607 | 0.00718769<br>584541502 | ATF4/RGCC/EDN1/NDRG1/ATM     | 5 | 0.14836795<br>2522255 |   |
| GO:0044774 | BP | GO:0044774 | mitotic DNA integrity checkpoint            | 3/42 | 85/18903  | 0.00088751<br>9366338784 | 0.01107513<br>22477427 | 0.00730670<br>001342102 | PLK2/ATM/CDK2                | 3 | 0.35294117<br>6470588 |   |
| GO:0042474 | BP | GO:0042474 | middle ear morphogenesis                    | 2/42 | 20/18903  | 0.00089273<br>846389515  | 0.01107513<br>22477427 | 0.00730670<br>001342102 | MSX1/EDN1                    | 2 |                       | 1 |
| GO:0032872 | BP | GO:0032872 | regulation of stress-activated MAPK cascade | 4/42 | 195/18903 | 0.00090456<br>5505324297 | 0.01114112<br>33461525 | 0.00735023<br>693459273 | GADD45A/DUSP1/MAPK1/PAFAH1B1 | 4 | 0.20512820<br>5128205 |   |

|            |    |            |                                                                                                                                                                                                               |      |           |                      |                    |                     |                            |   |                   |
|------------|----|------------|---------------------------------------------------------------------------------------------------------------------------------------------------------------------------------------------------------------|------|-----------|----------------------|--------------------|---------------------|----------------------------|---|-------------------|
| GO:2000134 | BP | GO:2000134 | negative regulation of G1/S transition of mitotic cell cycle regulation of stress-activated protein kinase signaling cascade                                                                                  | 3/42 | 87/18903  | 0.000949510783439577 | 0.0115423934160722 | 0.00761497057024437 | PLK2/ATM/CDK2              | 3 | 0.344827586206897 |
| GO:0070302 | BP | GO:0070302 | DNA biosynthetic process phosphatidylinositol 3-phosphate biosynthesis regulation of spindle checkpoint regulation of mitotic cell cycle spindle assembly checkpoint regulation of mitotic spindle checkpoint | 4/42 | 198/18903 | 0.000957371416520005 | 0.0115423934160722 | 0.00761497057024437 | GADD45A/DUSP1/MAPK1/PAF1H1 | 4 | 0.20202020202020  |
| GO:0071897 | BP | GO:0071897 | negative regulation of G1/S transition of mitotic cell cycle regulation of stress-activated protein kinase signaling cascade                                                                                  | 4/42 | 198/18903 | 0.000957371416520005 | 0.0115423934160722 | 0.00761497057024437 | MAPK1/RGCG/ATM/RPA1        | 4 | 0.20202020202020  |
| GO:0036092 | BP | GO:0036092 | DNA biosynthetic process phosphatidylinositol 3-phosphate biosynthesis regulation of spindle checkpoint regulation of mitotic cell cycle spindle assembly checkpoint regulation of mitotic spindle checkpoint | 2/42 | 21/18903  | 0.000985322271499081 | 0.011553915950729  | 0.00762257243921063 | UVRAG/ATM                  | 2 | 0.952380952380952 |
| GO:0090231 | BP | GO:0090231 | DNA biosynthetic process phosphatidylinositol 3-phosphate biosynthesis regulation of spindle checkpoint regulation of mitotic cell cycle spindle assembly checkpoint regulation of mitotic spindle checkpoint | 2/42 | 21/18903  | 0.000985322271499081 | 0.011553915950729  | 0.00762257243921063 | DUSP1/NDC80                | 2 | 0.952380952380952 |
| GO:0090266 | BP | GO:0090266 | DNA biosynthetic process phosphatidylinositol 3-phosphate biosynthesis regulation of spindle checkpoint regulation of mitotic cell cycle spindle assembly checkpoint regulation of mitotic spindle checkpoint | 2/42 | 21/18903  | 0.000985322271499081 | 0.011553915950729  | 0.00762257243921063 | DUSP1/NDC80                | 2 | 0.952380952380952 |
| GO:1903504 | BP | GO:1903504 | DNA biosynthetic process phosphatidylinositol 3-phosphate biosynthesis regulation of spindle checkpoint regulation of mitotic cell cycle spindle assembly checkpoint regulation of mitotic spindle checkpoint | 2/42 | 21/18903  | 0.000985322271499081 | 0.011553915950729  | 0.00762257243921063 | DUSP1/NDC80                | 2 | 0.952380952380952 |

|            |    |            |                                                         |      |           |                         |                        |                         |                                        |   |                       |
|------------|----|------------|---------------------------------------------------------|------|-----------|-------------------------|------------------------|-------------------------|----------------------------------------|---|-----------------------|
| GO:0050000 | BP | GO:0050000 | chromosome<br>localization                              | 3/42 | 89/18903  | 0.00101418<br>484611502 | 0.01181145<br>88880879 | 0.00779248<br>363681647 | NDC80/SPDL<br>1/ATM                    | 3 | 0.33707865<br>1685393 |
| GO:0045995 | BP | GO:0045995 | regulation<br>of embryonic<br>development               | 3/42 | 90/18903  | 0.00104754<br>188562308 | 0.01211751<br>15418021 | 0.00799439<br>860080769 | INSR/CLASP<br>2/PAFAH1B1               | 3 | 0.33333333<br>3333333 |
| GO:2000241 | BP | GO:2000241 | regulation<br>of reproductive<br>process                | 4/42 | 206/18903 | 0.00110877<br>087331696 | 0.01273970<br>29202593 | 0.00840488<br>270624587 | DUSP1/INSR<br>/MSX1/ASPM               | 4 | 0.19417475<br>7281553 |
| GO:0030705 | BP | GO:0030705 | cytoskeleton-<br>dependent<br>intracellular             | 4/42 | 208/18903 | 0.00114910<br>188332139 | 0.01311508<br>28283082 | 0.00865253<br>558458844 | RPGR/SUN2/<br>SSX2IP/PAF<br>AH1B1      | 4 | 0.19230769<br>2307692 |
| GO:0051383 | BP | GO:0051383 | kinetochore<br>organization                             | 2/42 | 23/18903  | 0.00118374<br>047656866 | 0.01341243<br>92053712 | 0.00884871<br>327309598 | SMC4/NDC80                             | 2 | 0.86956521<br>7391304 |
| GO:0060271 | BP | GO:0060271 | cilium<br>assembly                                      | 5/42 | 362/18903 | 0.00119082<br>404159838 | 0.01341243<br>92053712 | 0.00884871<br>327309598 | RPGR/MARK4<br>/SNX10/SSX<br>2IP/CCDC28 | 5 | 0.13812154<br>6961326 |
| GO:0032465 | BP | GO:0032465 | regulation<br>of cytokinesis                            | 3/42 | 95/18903  | 0.00122474<br>703484724 | 0.01370435<br>897816   | 0.00904130<br>422009692 | PLK2/UVRAG<br>/CETN2                   | 3 | 0.31578947<br>3684211 |
| GO:0010631 | BP | GO:0010631 | epithelial<br>cell migration                            | 5/42 | 366/18903 | 0.00125029<br>193403697 | 0.01385304<br>14071004 | 0.00913939<br>586191509 | GADD45A/PL<br>K2/CLASP2/<br>RGCC/EDN1  | 5 | 0.13661202<br>1857923 |
| GO:1902806 | BP | GO:1902806 | regulation<br>of cell cycle<br>G1/S phase<br>transition | 4/42 | 213/18903 | 0.00125442<br>439979696 | 0.01385304<br>14071004 | 0.00913939<br>586191509 | PLK2/RGCC/<br>ATM/CDK2                 | 4 | 0.18779342<br>7230047 |

|            |    |            |                                                         |      |           |                         |                        |                         |                                       |   |                       |
|------------|----|------------|---------------------------------------------------------|------|-----------|-------------------------|------------------------|-------------------------|---------------------------------------|---|-----------------------|
| GO:0051153 | BP | GO:0051153 | regulation of striated muscle cell                      | 3/42 | 96/18903  | 0.00126230<br>984784326 | 0.01385304<br>14071004 | 0.00913939<br>586191509 | MSX1/CYP26<br>B1/EDN1                 | 3 | 0.3125                |
| GO:0007097 | BP | GO:0007097 | nuclear migration                                       | 2/42 | 24/18903  | 0.00128953<br>659886349 | 0.01404619<br>32612655 | 0.00926682<br>573127019 | SUN2/PAFAH<br>1B1                     | 2 | 0.83333333<br>3333333 |
| GO:0090132 | BP | GO:0090132 | epithelium migration                                    | 5/42 | 369/18903 | 0.00129631<br>923789716 | 0.01404619<br>32612655 | 0.00926682<br>573127019 | GADD45A/PL<br>K2/CLASP2/<br>RGCC/EDN1 | 5 | 0.13550135<br>501355  |
| GO:1902807 | BP | GO:1902807 | negative regulation of cell cycle G1/S phase transition | 3/42 | 98/18903  | 0.00133959<br>967401632 | 0.01442386<br>56724272 | 0.00951599<br>106401527 | PLK2/ATM/C<br>DK2                     | 3 | 0.30612244<br>8979592 |
| GO:0090130 | BP | GO:0090130 | tissue migration                                        | 5/42 | 374/18903 | 0.00137580<br>96952367  | 0.01472116<br>37390327 | 0.00971213<br>028282225 | GADD45A/PL<br>K2/CLASP2/<br>RGCC/EDN1 | 5 | 0.13368983<br>9572193 |
| GO:0051446 | BP | GO:0051446 | positive regulation of meiotic cell cycle               | 2/42 | 25/18903  | 0.00139969<br>865044114 | 0.01488375<br>21090387 | 0.00981939<br>622048604 | INSR/MSX1                             | 2 | 0.8                   |
| GO:0043583 | BP | GO:0043583 | ear development                                         | 4/42 | 221/18903 | 0.00143675<br>117606498 | 0.01518344<br>45273039 | 0.01001711<br>50871847  | MSX1/MAPK1<br>/PAFAH1B1/<br>EDN1      | 4 | 0.18099547<br>5113122 |
| GO:0034453 | BP | GO:0034453 | microtubule                                             | 2/42 | 26/18903  | 0.00151420<br>764280989 | 0.01571105<br>14211547 | 0.01036519<br>80908135  | CEP57/CLAS<br>P2                      | 2 | 0.76923076<br>9230769 |
| GO:0051307 | BP | GO:0051307 | meiotic chromosome separation                           | 2/42 | 26/18903  | 0.00151420<br>764280989 | 0.01571105<br>14211547 | 0.01036519<br>80908135  | TOP2A/RMI1                            | 2 | 0.76923076<br>9230769 |
| GO:1904353 | BP | GO:1904353 | regulation of telomere                                  | 2/42 | 26/18903  | 0.00151420<br>764280989 | 0.01571105<br>14211547 | 0.01036519<br>80908135  | MAPK1/ATM                             | 2 | 0.76923076<br>9230769 |

|            |    |            |                                                                         |      |           |                         |                        |                        |                                        |   |                       |
|------------|----|------------|-------------------------------------------------------------------------|------|-----------|-------------------------|------------------------|------------------------|----------------------------------------|---|-----------------------|
| GO:0048477 | BP | GO:0048477 | oogenesis                                                               | 3/42 | 103/18903 | 0.00154568<br>972429901 | 0.01594108<br>92048187 | 0.01051696<br>30575323 | EDN1/ASPM/<br>ATM                      | 3 | 0.29126213<br>592233  |
| GO:0051651 | BP | GO:0051651 | maintenance of<br>location<br>regulation<br>of                          | 4/42 | 226/18903 | 0.00155967<br>725246504 | 0.01598902<br>6683953  | 0.01054858<br>92965332 | SUN2/UVRAG<br>/PAFAH1B1/<br>ASPM       | 4 | 0.17699115<br>0442478 |
| GO:0110020 | BP | GO:0110020 | actomyosin<br>structure<br>organization<br>positive<br>regulation<br>of | 3/42 | 104/18903 | 0.00158915<br>380150696 | 0.01619423<br>39772614 | 0.01068397<br>26128883 | CLASP2/RGC<br>C/EDN1                   | 3 | 0.28846153<br>8461538 |
| GO:1903055 | BP | GO:1903055 | extracellular matrix<br>organization<br>cellular<br>response<br>to      | 2/42 | 27/18903  | 0.00163304<br>464682643 | 0.01648411<br>23324508 | 0.01087521<br>67564681 | CLASP2/RGC<br>C                        | 2 | 0.74074074<br>0740741 |
| GO:0071241 | BP | GO:0071241 | inorganic<br>regulation<br>of                                           | 4/42 | 229/18903 | 0.00163685<br>69488999  | 0.01648411<br>23324508 | 0.01087521<br>67564681 | ATF4/MAPK1<br>/EDN1/CDK2               | 4 | 0.17467248<br>9082969 |
| GO:0010594 | BP | GO:0010594 | endothelial cell<br>migration<br>regulation<br>of                       | 4/42 | 230/18903 | 0.00166316<br>460541772 | 0.01655428<br>9560902  | 0.01092151<br>54321494 | GADD45A/PL<br>K2/RGCC/ED<br>N1         | 4 | 0.17391304<br>3478261 |
| GO:0050920 | BP | GO:0050920 | chemotaxis<br>cilium<br>organization                                    | 4/42 | 230/18903 | 0.00166316<br>460541772 | 0.01655428<br>9560902  | 0.01092151<br>54321494 | DUSP1/MAPK<br>1/EDN1/MTU<br>S1         | 4 | 0.17391304<br>3478261 |
| GO:0044782 | BP | GO:0044782 | organization                                                            | 5/42 | 391/18903 | 0.00167326<br>149618338 | 0.01655851<br>83899766 | 0.01092430<br>53568894 | RPGR/MARK4<br>/SNX10/SSX<br>2IP/CCDC28 | 5 | 0.12787723<br>7851662 |

|            |    |            |                                     |      |           |                     |                    |                    |                                |   |                   |
|------------|----|------------|-------------------------------------|------|-----------|---------------------|--------------------|--------------------|--------------------------------|---|-------------------|
| GO:0002685 | BP | GO:0002685 | regulation of leukocyte migration   | 4/42 | 231/18903 | 0.00168976569597396 | 0.0166257406408473 | 0.0109686545177257 | DUSP1/MAPK1/EDN1/MTUS1         | 4 | 0.173160173160173 |
| GO:0060348 | BP | GO:0060348 | bone development                    | 4/42 | 233/18903 | 0.00174385510281795 | 0.0168910035776484 | 0.0111436589023713 | MSX1/SNX10/PAFAH1B1/CYP26B1    | 4 | 0.171673819742489 |
| GO:0010758 | BP | GO:0010758 | regulation of macrophage chemotaxis | 2/42 | 28/18903  | 0.00175619079253587 | 0.0168910035776484 | 0.0111436589023713 | MAPK1/MTUS1                    | 2 | 0.714285714285714 |
| GO:0030878 | BP | GO:0030878 | thyroid gland development           | 2/42 | 28/18903  | 0.00175619079253587 | 0.0168910035776484 | 0.0111436589023713 | MAPK1/EDN1                     | 2 | 0.714285714285714 |
| GO:0051647 | BP | GO:0051647 | nucleus localization                | 2/42 | 28/18903  | 0.00175619079253587 | 0.0168910035776484 | 0.0111436589023713 | SUN2/PAFAH1B1                  | 2 | 0.714285714285714 |
| GO:0090398 | BP | GO:0090398 | cellular senescence                 | 3/42 | 108/18903 | 0.00177066182926431 | 0.016935044981567  | 0.0111727147474308 | PLK2/ATM/CK2                   | 3 | 0.277777777777778 |
| GO:0050900 | BP | GO:0050900 | leukocyte migration                 | 5/42 | 398/18903 | 0.00180858817427848 | 0.0172016830798042 | 0.0113486263801217 | DUSP1/MAPK1/PAFAH1B1/EDN1/MTUS | 5 | 0.125628140703518 |
| GO:0010458 | BP | GO:0010458 | exit from mitosis                   | 2/42 | 29/18903  | 0.00188362726901219 | 0.0178164082019275 | 0.0117541847028211 | CLASP2/RGCC                    | 2 | 0.689655172413793 |
| GO:0051403 | BP | GO:0051403 | stress-activated MAPK cascade       | 4/42 | 239/18903 | 0.00191334550634182 | 0.0179980632244901 | 0.011874029660525  | GADD45A/DUSP1/MAPK1/PAFAH1B1   | 4 | 0.167364016736402 |
| GO:0030595 | BP | GO:0030595 | leukocyte chemotaxis                | 4/42 | 240/18903 | 0.00194266524158259 | 0.0181740048830022 | 0.0119901052874209 | DUSP1/MAPK1/EDN1/MTUS          | 4 | 0.166666666666667 |
| GO:0061640 | BP | GO:0061640 | cytoskeleton-dependent              | 3/42 | 113/18903 | 0.00201512258928415 | 0.0186500220271824 | 0.0123041525056362 | CEP55/CUL7/SHCBP1L             | 3 | 0.265486725663717 |

|            |    |            |                                                                                                                                                                                                                                    |      |           |                         |                        |                        |                              |   |                       |
|------------|----|------------|------------------------------------------------------------------------------------------------------------------------------------------------------------------------------------------------------------------------------------|------|-----------|-------------------------|------------------------|------------------------|------------------------------|---|-----------------------|
| GO:1901798 | BP | GO:1901798 | positive regulation of signal transduction by p53 class mediator protein localization to chromosome stress-activated protein kinase signaling cascade regulation of cyclin-dependent protein serine/threonine kinase activity G1/S | 2/42 | 30/18903  | 0.00201533<br>532419903 | 0.01865002<br>20271824 | 0.01230415<br>25056362 | MSX1/ATM                     | 2 | 0.66666666<br>6666667 |
| GO:0034502 | BP | GO:0034502 | localization to chromosome stress-activated protein kinase signaling cascade regulation of cyclin-dependent protein serine/threonine kinase activity G1/S                                                                          | 3/42 | 115/18903 | 0.00211849<br>477369235 | 0.01945608<br>32728744 | 0.01283594<br>27888553 | NDC80/SPDL1/RPA1             | 3 | 0.26086956<br>5217391 |
| GO:0031098 | BP | GO:0031098 | protein kinase signaling cascade regulation of cyclin-dependent protein serine/threonine kinase activity G1/S                                                                                                                      | 4/42 | 246/18903 | 0.00212516<br>797431514 | 0.01945608<br>32728744 | 0.01283594<br>27888553 | GADD45A/DUSP1/MAPK1/PAFAH1B1 | 4 | 0.16260162<br>601626  |
| GO:0000079 | BP | GO:0000079 | protein serine/threonine kinase activity G1/S                                                                                                                                                                                      | 3/42 | 117/18903 | 0.00222511<br>452657256 | 0.02026274<br>50504905 | 0.01336812<br>92665865 | GADD45A/CCNL1/RGCC           | 3 | 0.25641025<br>6410256 |
| GO:0000082 | BP | GO:0000082 | transition of mitotic cell cycle smooth muscle cell apoptotic                                                                                                                                                                      | 4/42 | 250/18903 | 0.00225323<br>265958493 | 0.02041023<br>44614254 | 0.01346543<br>3827539  | PLK2/RGCC/ATM/CDK2           | 4 | 0.16                  |
| GO:0034390 | BP | GO:0034390 | muscle cell apoptotic                                                                                                                                                                                                              | 2/42 | 32/18903  | 0.00229149<br>145587465 | 0.02053944<br>17406146 | 0.01355067<br>69476632 | ATF4/EDN1                    | 2 | 0.625                 |

|            |    |            |                                                                                                                                                      |      |           |                         |                        |                        |                          |   |                       |
|------------|----|------------|------------------------------------------------------------------------------------------------------------------------------------------------------|------|-----------|-------------------------|------------------------|------------------------|--------------------------|---|-----------------------|
| GO:0034391 | BP | GO:0034391 | regulation of smooth muscle cell apoptotic cellular component assembly involved in morphogene regulation of cyclin-dependent protein kinase activity | 2/42 | 32/18903  | 0.00229149<br>145587465 | 0.02053944<br>17406146 | 0.01355067<br>69476632 | ATF4/EDN1                | 2 | 0.625                 |
| GO:0010927 | BP | GO:0010927 | DNA damage checkpoint signaling regulation of DNA biosynthetic process positive regulation of telomere maintenance via ear morphogenesis             | 3/42 | 119/18903 | 0.00233501<br>731309865 | 0.02082057<br>10417963 | 0.01373614<br>8996463  | CLASP2/PAF<br>AH1B1/EDN1 | 3 | 0.25210084<br>0336134 |
| GO:1904029 | BP | GO:1904029 | regulation of smooth muscle cell apoptotic cellular component assembly involved in morphogene regulation of cyclin-dependent protein kinase activity | 3/42 | 120/18903 | 0.00239121<br>075682864 | 0.02121115<br>44854437 | 0.01399383<br>22447621 | GADD45A/CC<br>NL1/RGCC   | 3 | 0.25                  |
| GO:0000077 | BP | GO:0000077 | DNA damage checkpoint signaling regulation of DNA biosynthetic process positive regulation of telomere maintenance via ear morphogenesis             | 3/42 | 121/18903 | 0.00244823<br>797722041 | 0.02149427<br>39333402 | 0.01418061<br>72715655 | PLK2/ATM/<br>DK2         | 3 | 0.24793388<br>4297521 |
| GO:2000278 | BP | GO:2000278 | DNA damage checkpoint signaling regulation of DNA biosynthetic process positive regulation of telomere maintenance via ear morphogenesis             | 3/42 | 121/18903 | 0.00244823<br>797722041 | 0.02149427<br>39333402 | 0.01418061<br>72715655 | MAPK1/RGCC<br>/ATM       | 3 | 0.24793388<br>4297521 |
| GO:0032212 | BP | GO:0032212 | DNA damage checkpoint signaling regulation of DNA biosynthetic process positive regulation of telomere maintenance via ear morphogenesis             | 2/42 | 34/18903  | 0.00258451<br>034248028 | 0.02257490<br>66649298 | 0.01489355<br>31551092 | MAPK1/ATM                | 2 | 0.58823529<br>4117647 |
| GO:0042471 | BP | GO:0042471 | DNA damage checkpoint signaling regulation of DNA biosynthetic process positive regulation of telomere maintenance via ear morphogenesis             | 3/42 | 124/18903 | 0.00262436<br>470116954 | 0.02280666<br>17685394 | 0.01504645<br>11052894 | MSX1/MAPK1<br>/EDN1      | 3 | 0.24193548<br>3870968 |

|            |    |            |                                                            |      |           |                     |                    |                    |                          |   |                   |
|------------|----|------------|------------------------------------------------------------|------|-----------|---------------------|--------------------|--------------------|--------------------------|---|-------------------|
| GO:0043244 | BP | GO:0043244 | regulation of protein-containing complex gland development | 3/42 | 126/18903 | 0.0027460284744641  | 0.0237434381226391 | 0.0156644792828282 | INSR/UVRAG/CLASP2        | 3 | 0.238095238095238 |
| GO:0048732 | BP | GO:0048732 | positive regulation of protein-containing complex          | 5/42 | 441/18903 | 0.00282341538463194 | 0.0242898851180396 | 0.016024991841894  | INSR/MSX1/MAPK1/EDN1/ATM | 5 | 0.113378684807256 |
| GO:0043243 | BP | GO:0043243 | positive regulation of protein-containing complex          | 2/42 | 36/18903  | 0.00289424407072531 | 0.0246514718859788 | 0.0162635448436149 | INSR/UVRAG               | 2 | 0.555555555555556 |
| GO:0050775 | BP | GO:0050775 | positive regulation of dendrite morphogenesis              | 2/42 | 36/18903  | 0.00289424407072531 | 0.0246514718859788 | 0.0162635448436149 | CUL7/PAPAH1B1            | 2 | 0.555555555555556 |
| GO:0031570 | BP | GO:0031570 | integrity checkpoint signaling                             | 3/42 | 129/18903 | 0.00293497485375111 | 0.0248746383644649 | 0.016410776540255  | PLK2/ATM/DK2             | 3 | 0.232558139534884 |
| GO:1904358 | BP | GO:1904358 | positive regulation of telomere maintenance via telomere   | 2/42 | 37/18903  | 0.00305533303110881 | 0.0257671435924054 | 0.0169995973159438 | MAPK1/ATM                | 2 | 0.540540540540541 |
| GO:0007611 | BP | GO:0007611 | learning or memory                                         | 4/42 | 273/18903 | 0.0030946860345569  | 0.0259710906429481 | 0.0171341492006169 | INSR/PLK2/MAPK1/PAPAH1B1 | 4 | 0.146520146520147 |

|            |    |            |                                                                                                                              |      |           |                         |                        |                        |                                |   |                       |
|------------|----|------------|------------------------------------------------------------------------------------------------------------------------------|------|-----------|-------------------------|------------------------|------------------------|--------------------------------|---|-----------------------|
| GO:0043516 | BP | GO:0043516 | regulation<br>of DNA<br>damage<br>response,<br>signal<br>transducti<br>on by p53<br>class<br>mediator<br>endocrine<br>system | 2/42 | 38/18903  | 0.00322054<br>565408525 | 0.02689548<br>3706312  | 0.01774400<br>7634575  | MSX1/ATM                       | 2 | 0.52631578<br>9473684 |
| GO:0035270 | BP | GO:0035270 | developmen<br>odontogene<br>sis                                                                                              | 3/42 | 135/18903 | 0.00333648<br>216524903 | 0.02759448<br>05164557 | 0.01820516<br>33018673 | INSR/MAPK1<br>/EDN1            | 3 | 0.22222222<br>2222222 |
| GO:0042476 | BP | GO:0042476 | cell cycle<br>G1/S phase<br>transition<br>endothelia<br>l cell<br>migration                                                  | 3/42 | 135/18903 | 0.00333648<br>216524903 | 0.02759448<br>05164557 | 0.01820516<br>33018673 | MSX1/SNX10<br>/EDN1            | 3 | 0.22222222<br>2222222 |
| GO:0044843 | BP | GO:0044843 | telomere<br>capping                                                                                                          | 4/42 | 280/18903 | 0.00338830<br>076026008 | 0.02788832<br>16421407 | 0.01839902<br>1840886  | PLK2/RGCC/<br>ATM/CDK2         | 4 | 0.14285714<br>2857143 |
| GO:0043542 | BP | GO:0043542 | macrophage<br>chemotaxis<br>positive<br>regulation<br>of nitric<br>oxide                                                     | 4/42 | 281/18903 | 0.00343174<br>305144332 | 0.02811073<br>73400524 | 0.01854575<br>82180744 | GADD45A/PL<br>K2/RGCC/ED<br>N1 | 4 | 0.14234875<br>4448399 |
| GO:0016233 | BP | GO:0016233 | telomere<br>capping                                                                                                          | 2/42 | 40/18903  | 0.00356326<br>902780082 | 0.02891145<br>29649052 | 0.01907402<br>17851348 | MAPK1/ATM                      | 2 | 0.5                   |
| GO:0048246 | BP | GO:0048246 | macrophage<br>chemotaxis<br>positive<br>regulation<br>of nitric<br>oxide                                                     | 2/42 | 40/18903  | 0.00356326<br>902780082 | 0.02891145<br>29649052 | 0.01907402<br>17851348 | MAPK1/MTUS<br>1                | 2 | 0.5                   |
| GO:0045429 | BP | GO:0045429 | biosynthes<br>ic process<br>phosphatid<br>ylinositol<br>3-kinase<br>signaling                                                | 2/42 | 42/18903  | 0.00392226<br>904390147 | 0.03167417<br>26564119 | 0.02089669<br>65447183 | INSR/EDN1                      | 2 | 0.47619047<br>6190476 |
| GO:0014065 | BP | GO:0014065 | regulation<br>of DNA<br>damage<br>response,<br>signal<br>transducti<br>on by p53<br>class<br>mediator<br>endocrine<br>system | 3/42 | 145/18903 | 0.00407753<br>942684074 | 0.03277346<br>24354524 | 0.02162194<br>12157159 | CEP55/INSR<br>/EDN1            | 3 | 0.20689655<br>1724138 |

|            |    |            |                                                                     |      |           |                         |                        |                        |                                        |   |                       |
|------------|----|------------|---------------------------------------------------------------------|------|-----------|-------------------------|------------------------|------------------------|----------------------------------------|---|-----------------------|
| GO:0071459 | BP | GO:0071459 | protein<br>localizati<br>on to<br>chromosome                        | 2/42 | 43/18903  | 0.00410782<br>768357072 | 0.03286262<br>14685657 | 0.02168076<br>29339468 | NDC80/SPDL<br>1                        | 2 | 0.46511627<br>9069767 |
| GO:0001666 | BP | GO:0001666 | ,<br>centromeri<br>response<br>to hypoxia                           | 4/42 | 296/18903 | 0.00412977<br>866101746 | 0.03288456<br>31054042 | 0.02169523<br>86941089 | RGCC/EDN1/<br>NDRG1/ATM                | 4 | 0.13513513<br>5135135 |
| GO:0022411 | BP | GO:0022411 | cellular<br>component<br>disassembl                                 | 5/42 | 483/18903 | 0.00416378<br>300966897 | 0.03300183<br>57062651 | 0.02177260<br>80378889 | TOP2A/INSR<br>/UVRAG/CLA<br>SP2/PFAFH1 | 5 | 0.10351966<br>873706  |
| GO:1904407 | BP | GO:1904407 | positive<br>regulation<br>of nitric<br>oxide                        | 2/42 | 44/18903  | 0.00429740<br>146625356 | 0.03374840<br>05056243 | 0.02226514<br>61771611 | INSR/EDN1                              | 2 | 0.45454545<br>4545455 |
| GO:1905521 | BP | GO:1905521 | metabolic<br>process<br>regulation<br>of<br>macrophage<br>migration | 2/42 | 44/18903  | 0.00429740<br>146625356 | 0.03374840<br>05056243 | 0.02226514<br>61771611 | MAPK1/MTUS<br>1                        | 2 | 0.45454545<br>4545455 |
| GO:0006302 | BP | GO:0006302 | double-<br>strand<br>break<br>repair                                | 4/42 | 300/18903 | 0.00433101<br>742920782 | 0.03385708<br>60219351 | 0.02233685<br>02837779 | RMI1/UVRAG<br>/ATM/RPA1                | 4 | 0.13333333<br>3333333 |
| GO:0051054 | BP | GO:0051054 | positive<br>regulation<br>of DNA<br>metabolic<br>process            | 4/42 | 301/18903 | 0.00438234<br>643135467 | 0.03408340<br>31376593 | 0.02248616<br>05796289 | MAPK1/RGCC<br>/ATM/CDK2                | 4 | 0.13289036<br>5448505 |

|            |    |            |                                                       |      |           |                         |                        |                        |                       |   |                       |
|------------|----|------------|-------------------------------------------------------|------|-----------|-------------------------|------------------------|------------------------|-----------------------|---|-----------------------|
| GO:0016525 | BP | GO:0016525 | negative regulation of angiogenesis                   | 3/42 | 149/18903 | 0.00439978<br>51012983  | 0.03408340<br>31376593 | 0.02248616<br>05796289 | GADD45A/PL<br>K2/RGCC | 3 | 0.20134228<br>1879195 |
| GO:0043535 | BP | GO:0043535 | regulation of blood vessel endothelial cell migration | 3/42 | 150/18903 | 0.00448269<br>439710621 | 0.03447777<br>99417853 | 0.02274634<br>64569206 | GADD45A/PL<br>K2/RGCC | 3 | 0.2                   |
| GO:1900744 | BP | GO:1900744 | regulation of p38MAPK cascade                         | 2/42 | 45/18903  | 0.00449097<br>250409937 | 0.03447777<br>99417853 | 0.02274634<br>64569206 | GADD45A/DU<br>SP1     | 2 | 0.44444444<br>4444444 |
| GO:0071456 | BP | GO:0071456 | cellular response to hypoxia                          | 3/42 | 151/18903 | 0.00456654<br>93350053  | 0.03474636<br>64956848 | 0.02292354<br>35623892 | RGCC/EDN1/<br>NDRG1   | 3 | 0.19867549<br>6688742 |
| GO:2000181 | BP | GO:2000181 | negative regulation of blood vessel morphogenesis     | 3/42 | 151/18903 | 0.00456654<br>93350053  | 0.03474636<br>64956848 | 0.02292354<br>35623892 | GADD45A/PL<br>K2/RGCC | 3 | 0.19867549<br>6688742 |
| GO:1901343 | BP | GO:1901343 | negative regulation of vasculature                    | 3/42 | 152/18903 | 0.00465135<br>310193729 | 0.03523502<br>88075958 | 0.02324593<br>32947309 | GADD45A/PL<br>K2/RGCC | 3 | 0.19736842<br>1052632 |
| GO:0085029 | BP | GO:0085029 | extracellular matrix assembly                         | 2/42 | 46/18903  | 0.00468852<br>296563271 | 0.03536013<br>79610714 | 0.02332847<br>27202592 | CLASP2/RGC<br>C       | 2 | 0.43478260<br>8695652 |

|            |    |            |                                           |      |           |                         |                        |                        |                            |   |                       |
|------------|----|------------|-------------------------------------------|------|-----------|-------------------------|------------------------|------------------------|----------------------------|---|-----------------------|
| GO:0044089 | BP | GO:0044089 | positive regulation of cellular component | 5/42 | 498/18903 | 0.00473774<br>403438135 | 0.03557463<br>94160565 | 0.02346998<br>77603471 | MARK4/CLASP2/RGCC/ATM/CDK2 | 5 | 0.10040160<br>6425703 |
| GO:0000723 | BP | GO:0000723 | telomere maintenance                      | 3/42 | 154/18903 | 0.00482381<br>970444008 | 0.03606279<br>18515346 | 0.02379204<br>11071671 | MAPK1/ATM/RPA1             | 3 | 0.19480519<br>4805195 |
| GO:0042073 | BP | GO:0042073 | intracellular                             | 2/42 | 47/18903  | 0.00489003<br>507560067 | 0.03639886<br>97801232 | 0.02401376<br>49250321 | RPGR/SSX2IP                | 2 | 0.42553191<br>4893617 |
| GO:0050890 | BP | GO:0050890 | cognition                                 | 4/42 | 314/18903 | 0.00508756<br>669580747 | 0.03712119<br>48449905 | 0.02449031<br>11588015 | INSR/PLK2/MAPK1/PAFAH1B1   | 4 | 0.12738853<br>5031847 |
| GO:0044839 | BP | GO:0044839 | cell cycle G2/M phase transition          | 3/42 | 157/18903 | 0.00508971<br>359430957 | 0.03712119<br>48449905 | 0.02449031<br>11588015 | NDC80/ATM/CDK2             | 3 | 0.19108280<br>2547771 |
| GO:0010171 | BP | GO:0010171 | body morphogenesis                        | 2/42 | 48/18903  | 0.00509549<br>111482054 | 0.03712119<br>48449905 | 0.02449031<br>11588015 | MSX1/CLASP2                | 2 | 0.41666666<br>6666667 |
| GO:0048538 | BP | GO:0048538 | thymus development                        | 2/42 | 48/18903  | 0.00509549<br>111482054 | 0.03712119<br>48449905 | 0.02449031<br>11588015 | MAPK1/ATM                  | 2 | 0.41666666<br>6666667 |
| GO:1901976 | BP | GO:1901976 | regulation of cell cycle checkpoint       | 2/42 | 48/18903  | 0.00509549<br>111482054 | 0.03712119<br>48449905 | 0.02449031<br>11588015 | DUSP1/NDC80                | 2 | 0.41666666<br>6666667 |
| GO:0030261 | BP | GO:0030261 | chromosome condensation                   | 2/42 | 49/18903  | 0.00530487<br>342002797 | 0.03815942<br>5609613  | 0.02517527<br>27982752 | SMC4/TOP2A                 | 2 | 0.40816326<br>5306122 |
| GO:0034198 | BP | GO:0034198 | cellular response to amino acid           | 2/42 | 49/18903  | 0.00530487<br>342002797 | 0.03815942<br>5609613  | 0.02517527<br>27982752 | ATF4/MAPK1                 | 2 | 0.40816326<br>5306122 |
| GO:0035094 | BP | GO:0035094 | response to                               | 2/42 | 49/18903  | 0.00530487<br>342002797 | 0.03815942<br>5609613  | 0.02517527<br>27982752 | MAPK1/EDN1                 | 2 | 0.40816326<br>5306122 |

|            |    |            |                                                                                                                      |      |           |                         |                        |                        |                          |   |                       |
|------------|----|------------|----------------------------------------------------------------------------------------------------------------------|------|-----------|-------------------------|------------------------|------------------------|--------------------------|---|-----------------------|
| GO:0051147 | BP | GO:0051147 | regulation<br>of muscle<br>cell<br>differenti<br>ation                                                               | 3/42 | 160/18903 | 0.00536431<br>260516646 | 0.03836307<br>17577084 | 0.02530962<br>61657778 | MSX1/CYP26<br>B1/EDN1    | 3 | 0.1875                |
| GO:0060326 | BP | GO:0060326 | cell<br>chemotaxis<br>negative<br>regulation<br>of stress-<br>activated<br>MAPK<br>cascade                           | 4/42 | 319/18903 | 0.00537800<br>071369744 | 0.03836307<br>17577084 | 0.02530962<br>61657778 | DUSP1/MAPK<br>1/EDN1/MTU | 4 | 0.12539184<br>9529781 |
| GO:0032873 | BP | GO:0032873 | face<br>developmen<br>negative<br>regulation<br>of stress-<br>activated<br>protein<br>kinase<br>signaling<br>cascade | 2/42 | 51/18903  | 0.00573534<br>645403088 | 0.04007719<br>6446126  | 0.02644050<br>15904409 | DUSP1/PAFA<br>H1B1       | 2 | 0.39215686<br>2745098 |
| GO:0060324 | BP | GO:0060324 | positive<br>regulation<br>of anion<br>transport<br>response<br>to amino<br>acid<br>Golgi<br>organizati<br>on         | 2/42 | 51/18903  | 0.00573534<br>645403088 | 0.04007719<br>6446126  | 0.02644050<br>15904409 | MSX1/MAPK1               | 2 | 0.39215686<br>2745098 |
| GO:0070303 | BP | GO:0070303 | positive<br>regulation<br>of anion<br>transport<br>response<br>to amino<br>acid<br>Golgi<br>organizati<br>on         | 2/42 | 51/18903  | 0.00573534<br>645403088 | 0.04007719<br>6446126  | 0.02644050<br>15904409 | DUSP1/PAFA<br>H1B1       | 2 | 0.39215686<br>2745098 |
| GO:1903793 | BP | GO:1903793 | positive<br>regulation<br>of anion<br>transport<br>response<br>to amino<br>acid<br>Golgi<br>organizati<br>on         | 2/42 | 51/18903  | 0.00573534<br>645403088 | 0.04007719<br>6446126  | 0.02644050<br>15904409 | ATF4/EDN1                | 2 | 0.39215686<br>2745098 |
| GO:1990928 | BP | GO:1990928 | positive<br>regulation<br>of anion<br>transport<br>response<br>to amino<br>acid<br>Golgi<br>organizati<br>on         | 2/42 | 51/18903  | 0.00573534<br>645403088 | 0.04007719<br>6446126  | 0.02644050<br>15904409 | ATF4/MAPK1               | 2 | 0.39215686<br>2745098 |
| GO:0007030 | BP | GO:0007030 | positive<br>regulation<br>of anion<br>transport<br>response<br>to amino<br>acid<br>Golgi<br>organizati<br>on         | 3/42 | 165/18903 | 0.00584153<br>567641126 | 0.04065328<br>89350247 | 0.02682057<br>24466807 | CUL7/CLASP<br>2/MAPK1    | 3 | 0.18181818<br>1818182 |

|            |    |            |                                                                  |      |           |                         |                        |                        |                          |   |                       |
|------------|----|------------|------------------------------------------------------------------|------|-----------|-------------------------|------------------------|------------------------|--------------------------|---|-----------------------|
| GO:0010970 | BP | GO:0010970 | transport<br>along<br>microtubul<br>positive<br>regulation<br>of | 3/42 | 168/18903 | 0.00613972<br>745843446 | 0.04216099<br>41864527 | 0.02781526<br>48561632 | RPGR/SSX2I<br>P/PAFAH1B1 | 3 | 0.17857142<br>8571429 |
| GO:0048639 | BP | GO:0048639 | developmental growth<br>regulation<br>of                         | 3/42 | 168/18903 | 0.00613972<br>745843446 | 0.04216099<br>41864527 | 0.02781526<br>48561632 | INSR/PAFAH<br>1B1/EDN1   | 3 | 0.17857142<br>8571429 |
| GO:0032210 | BP | GO:0032210 | telomere<br>maintenanc<br>e via<br>positive<br>regulation<br>of  | 2/42 | 53/18903  | 0.00618131<br>398411193 | 0.04216099<br>41864527 | 0.02781526<br>48561632 | MAPK1/ATM                | 2 | 0.37735849<br>0566038 |
| GO:0051155 | BP | GO:0051155 | of<br>striated<br>muscle<br>cell<br>regulation<br>of             | 2/42 | 53/18903  | 0.00618131<br>398411193 | 0.04216099<br>41864527 | 0.02781526<br>48561632 | CYP26B1/ED<br>N1         | 2 | 0.37735849<br>0566038 |
| GO:0071622 | BP | GO:0071622 | granulocyt<br>e<br>double-<br>strand<br>break<br>repair via      | 2/42 | 53/18903  | 0.00618131<br>398411193 | 0.04216099<br>41864527 | 0.02781526<br>48561632 | MAPK1/EDN1               | 2 | 0.37735849<br>0566038 |
| GO:0000724 | BP | GO:0000724 | homologous<br>recombinat<br>ion                                  | 3/42 | 169/18903 | 0.00624111<br>726535745 | 0.04239997<br>12630633 | 0.02797292<br>74257667 | RMI1/ATM/R<br>PA1        | 3 | 0.17751479<br>2899408 |

|            |    |            |                                                                       |      |           |                         |                        |                        |                          |   |                       |
|------------|----|------------|-----------------------------------------------------------------------|------|-----------|-------------------------|------------------------|------------------------|--------------------------|---|-----------------------|
| GO:0043525 | BP | GO:0043525 | positive regulation of neuron apoptotic process                       | 2/42 | 55/18903  | 0.00664263<br>670180736 | 0.04486726<br>46019994 | 0.02960069<br>78098533 | ATF4/ATM                 | 2 | 0.36363636<br>3636364 |
| GO:0000725 | BP | GO:0000725 | recombinational maintenance of location                               | 3/42 | 173/18903 | 0.00665670<br>865006299 | 0.04486726<br>46019994 | 0.02960069<br>78098533 | RMI1/ATM/RPA1            | 3 | 0.17341040<br>4624277 |
| GO:0051235 | BP | GO:0051235 | positive regulation of epithelial cell migration                      | 4/42 | 342/18903 | 0.00685783<br>850517953 | 0.04604164<br>5179872  | 0.03037548<br>28320233 | SUN2/UVRAG/PFAFH1B1/ASPM | 4 | 0.11695906<br>4327485 |
| GO:0010634 | BP | GO:0010634 | cellular response to chemical blood vessel endothelial cell migration | 3/42 | 176/18903 | 0.00697900<br>650808372 | 0.04667210<br>60228099 | 0.03079142<br>26281819 | PLK2/CLASP2/EDN1         | 3 | 0.17045454<br>5454545 |
| GO:0062197 | BP | GO:0062197 | mitotic metaphase plate congression                                   | 4/42 | 345/18903 | 0.00706885<br>777420884 | 0.04669743<br>14875943 | 0.03080813<br>08326295 | ATF4/MAPK1/EDN1/ATM      | 4 | 0.11594202<br>8985507 |
| GO:0043534 | BP | GO:0043534 | mitotic metaphase plate congression                                   | 3/42 | 177/18903 | 0.00708847<br>20758491  | 0.04669743<br>14875943 | 0.03080813<br>08326295 | GADD45A/PLK2/RGCC        | 3 | 0.16949152<br>5423729 |
| GO:0007080 | BP | GO:0007080 | metaphase plate congression                                           | 2/42 | 57/18903  | 0.00711917<br>617889142 | 0.04669743<br>14875943 | 0.03080813<br>08326295 | NDC80/SPDL1              | 2 | 0.35087719<br>2982456 |
| GO:0038066 | BP | GO:0038066 | p38MAPK cascade                                                       | 2/42 | 57/18903  | 0.00711917<br>617889142 | 0.04669743<br>14875943 | 0.03080813<br>08326295 | GADD45A/DUSP1            | 2 | 0.35087719<br>2982456 |

|            |    |            |                                                            |      |           |                         |                        |                        |                     |                                    |
|------------|----|------------|------------------------------------------------------------|------|-----------|-------------------------|------------------------|------------------------|---------------------|------------------------------------|
| GO:1903053 | BP | GO:1903053 | regulation of extracellular matrix organization            | 2/42 | 57/18903  | 0.00711917<br>617889142 | 0.04669743<br>14875943 | 0.03080813<br>08326295 | CLASP2/RGC<br>C     | <sup>2</sup> 0.35087719<br>2982456 |
| GO:0048015 | BP | GO:0048015 | phosphatidylinositol-mediated signaling                    | 3/42 | 178/18903 | 0.00719895<br>80929911  | 0.04704052<br>00580182 | 0.03103447<br>98464422 | CEP55/INSR<br>/EDN1 | <sup>3</sup> 0.16853932<br>5842697 |
| GO:0001961 | BP | GO:0001961 | positive regulation of cytokine-mediated signaling pathway | 2/42 | 58/18903  | 0.00736310<br>918289891 | 0.04774864<br>74284959 | 0.03150165<br>93032318 | PAFAH1B1/<br>DN1    | <sup>2</sup> 0.34482758<br>6206897 |
| GO:0048599 | BP | GO:0048599 | oocyte development                                         | 2/42 | 58/18903  | 0.00736310<br>918289891 | 0.04774864<br>74284959 | 0.03150165<br>93032318 | EDN1/ATM            | <sup>2</sup> 0.34482758<br>6206897 |
| GO:0048017 | BP | GO:0048017 | inositol lipid-mediated signaling                          | 3/42 | 182/18903 | 0.00765115<br>30330781  | 0.04942933<br>58212442 | 0.03261047<br>54895444 | CEP55/INSR<br>/EDN1 | <sup>3</sup> 0.16483516<br>4835165 |
| GO:0006998 | BP | GO:0006998 | nuclear envelope organization                              | 2/42 | 60/18903  | 0.00786221<br>615992568 | 0.05041241<br>22314336 | 0.03325904<br>96337483 | SUN2/PAFAH<br>1B1   | <sup>2</sup> 0.33333333<br>3333333 |
| GO:1905517 | BP | GO:1905517 | macrophage migration                                       | 2/42 | 60/18903  | 0.00786221<br>615992568 | 0.05041241<br>22314336 | 0.03325904<br>96337483 | MAPK1/MTUS<br>1     | <sup>2</sup> 0.33333333<br>3333333 |
| GO:0032200 | BP | GO:0032200 | telomere organization                                      | 3/42 | 185/18903 | 0.00800112<br>574929579 | 0.05111166<br>89656507 | 0.03372037<br>67831673 | MAPK1/ATM/<br>RPA1  | <sup>3</sup> 0.16216216<br>2162162 |

|            |    |            |                                                                |      |           |                         |                        |                        |                                 |   |                       |
|------------|----|------------|----------------------------------------------------------------|------|-----------|-------------------------|------------------------|------------------------|---------------------------------|---|-----------------------|
| GO:0030865 | BP | GO:0030865 | cortical<br>cytoskeleton<br>organization<br>regulation<br>of   | 2/42 | 61/18903  | 0.00811735<br>607090449 | 0.05129592<br>43662875 | 0.03384193<br>73124856 | PAFAH1B1/A<br>KAP11             | 2 | 0.32786885<br>2459016 |
| GO:1904356 | BP | GO:1904356 | telomere<br>maintenance<br>via<br>telomere<br>regulation<br>of | 2/42 | 61/18903  | 0.00811735<br>607090449 | 0.05129592<br>43662875 | 0.03384193<br>73124856 | MAPK1/ATM                       | 2 | 0.32786885<br>2459016 |
| GO:0043405 | BP | GO:0043405 | of MAP<br>kinase<br>activity                                   | 3/42 | 186/18903 | 0.00811985<br>718648594 | 0.05129592<br>43662875 | 0.03384193<br>73124856 | DUSP1/INSR<br>/EDN1             | 3 | 0.16129032<br>2580645 |
| GO:0003002 | BP | GO:0003002 | regionaliz<br>ation                                            | 4/42 | 360/18903 | 0.00818878<br>92401857  | 0.05135240<br>72498092 | 0.03387920<br>12906083 | MSX1/CYP26<br>B1/EDN1/AT        | 4 | 0.11111111<br>1111111 |
| GO:0010038 | BP | GO:0010038 | response<br>to metal<br>oocyte                                 | 4/42 | 360/18903 | 0.00818878<br>92401857  | 0.05135240<br>72498092 | 0.03387920<br>12906083 | ATF4/MAPK1<br>/EDN1/NDRG        | 4 | 0.11111111<br>1111111 |
| GO:0009994 | BP | GO:0009994 | differenti<br>ation<br>regulation<br>of nitric<br>oxide        | 2/42 | 62/18903  | 0.00837619<br>764556008 | 0.05214563<br>77061777 | 0.03440252<br>6597841  | EDN1/ATM<br>INSR/EDN1           | 2 | 0.32258064<br>516129  |
| GO:0045428 | BP | GO:0045428 | biosynthes<br>ic process<br>spermatid<br>developmen<br>t       | 2/42 | 62/18903  | 0.00837619<br>764556008 | 0.05214563<br>77061777 | 0.03440252<br>6597841  | INSR/EDN1                       | 2 | 0.32258064<br>516129  |
| GO:0007286 | BP | GO:0007286 | cellular<br>response<br>to                                     | 3/42 | 189/18903 | 0.00848230<br>263709147 | 0.05242491<br>73815906 | 0.03458677<br>83758281 | CEP57/PAFA<br>H1B1/CCNB1<br>IP1 | 3 | 0.15873015<br>8730159 |
| GO:0071478 | BP | GO:0071478 | cellular<br>response<br>to                                     | 3/42 | 189/18903 | 0.00848230<br>263709147 | 0.05242491<br>73815906 | 0.03458677<br>83758281 | GADD45A/AT<br>F4/ATM            | 3 | 0.15873015<br>8730159 |

|            |    |            |                                              |      |           |                         |                        |                        |                                   |   |                       |
|------------|----|------------|----------------------------------------------|------|-----------|-------------------------|------------------------|------------------------|-----------------------------------|---|-----------------------|
| GO:0030336 | BP | GO:0030336 | negative regulation of cell migration        | 4/42 | 368/18903 | 0.00883132<br>113701775 | 0.05438568<br>9879764  | 0.03588037<br>70542221 | GADD45A/DU<br>SP1/CLASP2<br>/RGCC | 4 | 0.10869565<br>2173913 |
| GO:0045143 | BP | GO:0045143 | homologous chromosome segregation            | 2/42 | 64/18903  | 0.00890491<br>825498448 | 0.05444721<br>44733337 | 0.03592096<br>72466103 | CCNB1IP1/A<br>TM                  | 2 | 0.3125                |
| GO:0050891 | BP | GO:0050891 | multicellular organismal water homeostasis   | 2/42 | 64/18903  | 0.00890491<br>825498448 | 0.05444721<br>44733337 | 0.03592096<br>72466103 | CYP26B1/AK<br>AP11                | 2 | 0.3125                |
| GO:0060760 | BP | GO:0060760 | positive regulation of response to           | 2/42 | 65/18903  | 0.00917476<br>365835901 | 0.05569927<br>44081937 | 0.03674700<br>03935021 | PAFAH1B1/E<br>DN1                 | 2 | 0.30769230<br>7692308 |
| GO:0080164 | BP | GO:0080164 | regulation of nitric oxide metabolic process | 2/42 | 65/18903  | 0.00917476<br>365835901 | 0.05569927<br>44081937 | 0.03674700<br>03935021 | INSR/EDN1                         | 2 | 0.30769230<br>7692308 |
| GO:0048515 | BP | GO:0048515 | spermatid differentiation                    | 3/42 | 196/18903 | 0.00936473<br>190853828 | 0.05665166<br>44078358 | 0.03737532<br>95066452 | CEP57/PAFA<br>H1B1/CCNB1<br>IP1   | 3 | 0.15306122<br>4489796 |
| GO:0048814 | BP | GO:0048814 | regulation of dendrite morphogenesis         | 2/42 | 66/18903  | 0.00944824<br>346233006 | 0.05675576<br>42368739 | 0.03744400<br>82551437 | CUL7/PAFAH<br>1B1                 | 2 | 0.30303030<br>3030303 |
| GO:0071300 | BP | GO:0071300 | cellular response to retinoic acid           | 2/42 | 66/18903  | 0.00944824<br>346233006 | 0.05675576<br>42368739 | 0.03744400<br>82551437 | CYP26B1/AT<br>M                   | 2 | 0.30303030<br>3030303 |

|            |    |            |                                                                                                                                                                |      |           |                         |                        |                        |                                   |   |                       |
|------------|----|------------|----------------------------------------------------------------------------------------------------------------------------------------------------------------|------|-----------|-------------------------|------------------------|------------------------|-----------------------------------|---|-----------------------|
| GO:0071248 | BP | GO:0071248 | cellular<br>response<br>to metal<br>double-<br>strand<br>break                                                                                                 | 3/42 | 198/18903 | 0.00962636<br>688803399 | 0.05761170<br>85316638 | 0.03800870<br>83463325 | ATF4/MAPK1<br>/EDN1               | 3 | 0.15151515<br>1515152 |
| GO:0006303 | BP | GO:0006303 | repair via<br>nonhomolog<br>ous end<br>joining<br>neuroblast<br>proliferat<br>ion                                                                              | 2/42 | 67/18903  | 0.00972534<br>098460913 | 0.05761170<br>85316638 | 0.03800870<br>83463325 | UVRAG/ATM                         | 2 | 0.29850746<br>2686567 |
| GO:0007405 | BP | GO:0007405 | positive<br>regulation<br>of<br>telomere<br>phosphatid<br>ylinositol<br>phosphate<br>biosynthet<br>ic process<br>negative<br>regulation<br>of cell<br>motility | 2/42 | 67/18903  | 0.00972534<br>098460913 | 0.05761170<br>85316638 | 0.03800870<br>83463325 | PAFAH1B1/A<br>SPM                 | 2 | 0.29850746<br>2686567 |
| GO:0032206 | BP | GO:0032206 | water<br>homeostasi<br>mammary<br>gland<br>epithelium<br>developmen                                                                                            | 2/42 | 67/18903  | 0.00972534<br>098460913 | 0.05761170<br>85316638 | 0.03800870<br>83463325 | MAPK1/ATM                         | 2 | 0.29850746<br>2686567 |
| GO:0046854 | BP | GO:0046854 | regulation<br>of cell<br>motility                                                                                                                              | 2/42 | 68/18903  | 0.01000603<br>95960099  | 0.05907013<br>72012721 | 0.03897089<br>10581437 | UVRAG/ATM                         | 2 | 0.29411764<br>7058824 |
| GO:2000146 | BP | GO:2000146 | water<br>homeostasi<br>mammary<br>gland<br>epithelium<br>developmen                                                                                            | 4/42 | 383/18903 | 0.01012365<br>60424976  | 0.05955910<br>35902263 | 0.03929348<br>14020615 | GADD45A/DU<br>SP1/CLASP2<br>/RGCC | 4 | 0.10443864<br>229765  |
| GO:0030104 | BP | GO:0030104 | water<br>homeostasi<br>mammary<br>gland<br>epithelium<br>developmen                                                                                            | 2/42 | 69/18903  | 0.01029032<br>27203036  | 0.06012639<br>07752893 | 0.03966774<br>3053299  | CYP26B1/AK<br>AP11                | 2 | 0.28985507<br>2463768 |
| GO:0061180 | BP | GO:0061180 | water<br>homeostasi<br>mammary<br>gland<br>epithelium<br>developmen                                                                                            | 2/42 | 69/18903  | 0.01029032<br>27203036  | 0.06012639<br>07752893 | 0.03966774<br>3053299  | MSX1/MAPK1                        | 2 | 0.28985507<br>2463768 |

|            |    |            |                                                                                   |      |           |                        |                        |                        |                                  |   |                       |
|------------|----|------------|-----------------------------------------------------------------------------------|------|-----------|------------------------|------------------------|------------------------|----------------------------------|---|-----------------------|
| GO:0031032 | BP | GO:0031032 | actomyosin<br>structure<br>organization                                           | 3/42 | 204/18903 | 0.01043685<br>41502599 | 0.06077515<br>06981124 | 0.04009575<br>54716396 | CLASP2/RGC<br>C/EDN1             | 3 | 0.14705882<br>3529412 |
| GO:0048167 | BP | GO:0048167 | regulation<br>of<br>synaptic<br>metaphase<br>plate                                | 3/42 | 207/18903 | 0.01085657<br>10777611 | 0.06286728<br>01039928 | 0.04147601<br>54645747 | ATF4/PLK2/<br>MAPK1              | 3 | 0.14492753<br>6231884 |
| GO:0051310 | BP | GO:0051310 | congression<br>in utero<br>embryonic<br>development                               | 2/42 | 71/18903  | 0.01086957<br>64665782 | 0.06286728<br>01039928 | 0.04147601<br>54645747 | NDC80/SPDL<br>1                  | 2 | 0.28169014<br>084507  |
| GO:0001701 | BP | GO:0001701 | microtubul<br>e-based<br>transport                                                | 4/42 | 393/18903 | 0.01105034<br>38201311 | 0.06369760<br>47813619 | 0.04202381<br>3287261  | MSX1/MAPK1<br>/EDN1/CCNB<br>1IP1 | 4 | 0.10178117<br>0483461 |
| GO:0099111 | BP | GO:0099111 | mitotic<br>spindle<br>assembly                                                    | 3/42 | 209/18903 | 0.01114177<br>21233154 | 0.06400910<br>69634763 | 0.04222932<br>35193126 | RPGR/SSX2I<br>P/PAFAH1B1         | 3 | 0.14354066<br>9856459 |
| GO:0090307 | BP | GO:0090307 | cellular<br>response<br>to<br>ionizing<br>nitric<br>oxide                         | 2/42 | 74/18903  | 0.01176492<br>95560523 | 0.06736307<br>49162594 | 0.04444206<br>79938185 | KIF11/CLAS<br>P2                 | 2 | 0.27027027<br>027027  |
| GO:0071479 | BP | GO:0071479 | biosynthetic<br>process<br>regulation<br>of glucose<br>transmembrane<br>transport | 2/42 | 75/18903  | 0.01207037<br>46043997 | 0.06888160<br>44091075 | 0.04544390<br>15807749 | GADD45A/AT<br>M                  | 2 | 0.26666666<br>6666667 |
| GO:0006809 | BP | GO:0006809 | regulation<br>of glucose<br>transmembrane<br>transport                            | 2/42 | 76/18903  | 0.01237928<br>96027821 | 0.07040978<br>00663224 | 0.04645209<br>91214731 | INSR/EDN1                        | 2 | 0.26315789<br>4736842 |
| GO:0010827 | BP | GO:0010827 | transmembrane<br>transport                                                        | 2/42 | 77/18903  | 0.01269165<br>83934696 | 0.07194741<br>44689402 | 0.04746653<br>69682568 | INSR/EDN1                        | 2 | 0.25974025<br>974026  |

|            |    |            |                                                                 |      |           |                        |                        |                        |                            |   |                        |
|------------|----|------------|-----------------------------------------------------------------|------|-----------|------------------------|------------------------|------------------------|----------------------------|---|------------------------|
| GO:0043537 | BP | GO:0043537 | negative regulation of blood vessel endothelial cell migration  | 2/42 | 78/18903  | 0.01300746<br>48704043 | 0.07325256<br>53228033 | 0.04832759<br>6280969  | GADD45A/RGCC               | 2 | 0.25641025<br>6410256  |
| GO:0061045 | BP | GO:0061045 | negative regulation of wound healing                            | 2/42 | 78/18903  | 0.01300746<br>48704043 | 0.07325256<br>53228033 | 0.04832759<br>6280969  | CLASP2/EDN1                | 2 | 0.25641025<br>6410256  |
| GO:0007018 | BP | GO:0007018 | microtubule-based movement                                      | 4/42 | 415/18903 | 0.01327874<br>1931492  | 0.07453510<br>22515221 | 0.04917373<br>62985018 | RPGR/KIF11/SSX2IP/PAFAH1B1 | 4 | 0.09638554<br>21686747 |
| GO:0040013 | BP | GO:0040013 | negative regulation of locomotion                               | 4/42 | 419/18903 | 0.01371259<br>52646254 | 0.07671883<br>36373811 | 0.05061442<br>97177262 | GADD45A/DUSP1/CLASP2/RGCC  | 4 | 0.09546539<br>37947494 |
| GO:0097061 | BP | GO:0097061 | dendritic spine organization                                    | 2/42 | 81/18903  | 0.01397535<br>01302413 | 0.07793420<br>00748309 | 0.05141625<br>47222661 | INSR/PAFAH1B1              | 2 | 0.24691358<br>0246914  |
| GO:0071902 | BP | GO:0071902 | positive regulation of protein serine/threonine kinase activity | 3/42 | 229/18903 | 0.01423350<br>2533867  | 0.07874510<br>42187198 | 0.05195124<br>0055759  | INSR/RGCC/EDN1             | 3 | 0.13100436<br>6812227  |

|            |    |            |                                                                       |      |           |                        |                        |                        |                    |   |                       |
|------------|----|------------|-----------------------------------------------------------------------|------|-----------|------------------------|------------------------|------------------------|--------------------|---|-----------------------|
| GO:0010770 | BP | GO:0010770 | positive regulation of cell morphogenesis involved in differentiation | 2/42 | 82/18903  | 0.01430474<br>73201062 | 0.07874510<br>42187198 | 0.05195124<br>0055759  | CUL7/PAPAH1B1      | 2 | 0.24390243<br>902439  |
| GO:0046209 | BP | GO:0046209 | nitric oxide metabolic process                                        | 2/42 | 82/18903  | 0.01430474<br>73201062 | 0.07874510<br>42187198 | 0.05195124<br>0055759  | INSR/EDN1          | 2 | 0.24390243<br>902439  |
| GO:0051149 | BP | GO:0051149 | positive regulation of muscle cell differentiation                    | 2/42 | 82/18903  | 0.01430474<br>73201062 | 0.07874510<br>42187198 | 0.05195124<br>0055759  | CYP26B1/EDN1       | 2 | 0.24390243<br>902439  |
| GO:0050769 | BP | GO:0050769 | positive regulation of neurogenesis                                   | 3/42 | 231/18903 | 0.01456686<br>54091089 | 0.07980701<br>96515537 | 0.05265182<br>74016952 | CUL7/PAPAH1B1/ASPM | 3 | 0.12987012<br>987013  |
| GO:0014032 | BP | GO:0014032 | neural crest cell development                                         | 2/42 | 83/18903  | 0.01463750<br>2436091  | 0.07980701<br>96515537 | 0.05265182<br>74016952 | MAPK1/EDN1         | 2 | 0.24096385<br>5421687 |
| GO:2001057 | BP | GO:2001057 | reactive nitrogen species metabolic process                           | 2/42 | 83/18903  | 0.01463750<br>2436091  | 0.07980701<br>96515537 | 0.05265182<br>74016952 | INSR/EDN1          | 2 | 0.24096385<br>5421687 |

|            |    |            |                                                                              |      |           |            |            |            |                                |   |                        |
|------------|----|------------|------------------------------------------------------------------------------|------|-----------|------------|------------|------------|--------------------------------|---|------------------------|
| GO:0031331 | BP | GO:0031331 | positive regulation of cellular catabolic                                    | 4/42 | 429/18903 | 0.01483669 | 0.08063627 | 0.05319892 | INSR/PLK2/<br>UVRAG/ATM        | 4 | 0.09324009<br>32400932 |
| GO:0008406 | BP | GO:0008406 | gonad developmen                                                             | 3/42 | 233/18903 | 0.01490466 | 0.08074930 | 0.05327348 | INSR/ASPM/<br>ATM              | 3 | 0.12875536<br>4806867  |
| GO:0006289 | BP | GO:0006289 | nucleotide -excision repair                                                  | 2/42 | 84/18903  | 0.01497359 | 0.08086688 | 0.05335106 | CETN2/RPA1                     | 2 | 0.23809523<br>8095238  |
| GO:0000281 | BP | GO:0000281 | mitotic cytokinesi                                                           | 2/42 | 85/18903  | 0.01531302 | 0.08243992 | 0.05438885 | CEP55/CUL7                     | 2 | 0.23529411<br>7647059  |
| GO:0032102 | BP | GO:0032102 | negative regulation of response to developmen t of primary sexual characteri | 4/42 | 436/18903 | 0.01565751 | 0.08403030 | 0.05543809 | DUSP1/PLK2<br>/CLASP2/ED<br>N1 | 4 | 0.09174311<br>92660551 |
| GO:0045137 | BP | GO:0045137 | regulation of muscle cell apoptotic process                                  | 3/42 | 238/18903 | 0.01576859 | 0.08436196 | 0.05565690 | INSR/ASPM/<br>ATM              | 3 | 0.12605042<br>0168067  |
| GO:0010660 | BP | GO:0010660 | positive regulation of reproducti ve process                                 | 2/42 | 87/18903  | 0.01600178 | 0.08507782 | 0.05612918 | ATF4/EDN1                      | 2 | 0.22988505<br>7471264  |
| GO:2000243 | BP | GO:2000243 | positive regulation of reproducti ve process                                 | 2/42 | 87/18903  | 0.01600178 | 0.08507782 | 0.05612918 | INSR/MSX1                      | 2 | 0.22988505<br>7471264  |

|            |    |            |                                                               |           |                        |                        |                        |                          |   |                        |
|------------|----|------------|---------------------------------------------------------------|-----------|------------------------|------------------------|------------------------|--------------------------|---|------------------------|
| GO:0032984 | BP | GO:0032984 | protein-<br>containing<br>complex<br>3/42                     | 242/18903 | 0.01647979<br>03575896 | 0.08734799<br>0997503  | 0.05762690<br>25702907 | INSR/UVRAG<br>/CLASP2    | 3 | 0.12396694<br>214876   |
| GO:0048864 | BP | GO:0048864 | disassembl<br>stem cell<br>developmen<br>modulation<br>2/42   | 89/18903  | 0.01670366<br>8378728  | 0.08826135<br>88406862 | 0.05822948<br>72331876 | MAPK1/EDN1               | 2 | 0.22471910<br>1123595  |
| GO:0050804 | BP | GO:0050804 | of<br>chemical<br>synaptic<br>transmissi<br>embryonic<br>4/42 | 448/18903 | 0.01713066<br>94962269 | 0.09023909<br>59308935 | 0.05953427<br>81196807 | ATF4/PLK2/<br>MAPK1/EDN1 | 4 | 0.08928571<br>42857143 |
| GO:0048568 | BP | GO:0048568 | organ<br>developmen<br>regulation<br>4/42                     | 449/18903 | 0.01725723<br>51889455 | 0.09034980<br>6249158  | 0.05960731<br>80677242 | ATF4/MSX1/<br>MAPK1/EDN1 | 4 | 0.08908685<br>9688196  |
| GO:0099177 | BP | GO:0099177 | of trans-<br>synaptic<br>signaling<br>neuron<br>4/42          | 449/18903 | 0.01725723<br>51889455 | 0.09034980<br>6249158  | 0.05960731<br>80677242 | ATF4/PLK2/<br>MAPK1/EDN1 | 4 | 0.08908685<br>9688196  |
| GO:0106027 | BP | GO:0106027 | projection<br>organizati<br>on<br>2/42                        | 91/18903  | 0.01741854<br>34380326 | 0.09036529<br>20179145 | 0.05961753<br>46379872 | INSR/PFAFH<br>1B1        | 2 | 0.21978021<br>978022   |
| GO:1901216 | BP | GO:1901216 | positive<br>regulation<br>of neuron<br>death<br>2/42          | 91/18903  | 0.01741854<br>34380326 | 0.09036529<br>20179145 | 0.05961753<br>46379872 | ATF4/ATM                 | 2 | 0.21978021<br>978022   |
| GO:1903351 | BP | GO:1903351 | cellular<br>response<br>to<br>2/42                            | 91/18903  | 0.01741854<br>34380326 | 0.09036529<br>20179145 | 0.05961753<br>46379872 | ATF4/MAPK1               | 2 | 0.21978021<br>978022   |
| GO:0048863 | BP | GO:0048863 | stem cell<br>differenti<br>ation<br>3/42                      | 248/18903 | 0.01758012<br>24668376 | 0.09092800<br>50248516 | 0.05998877<br>85241428 | MSX1/MAPK1<br>/EDN1      | 3 | 0.12096774<br>1935484  |

|            |    |            |                                                                                                                                                                      |      |           |                        |                        |                        |                    |   |                       |
|------------|----|------------|----------------------------------------------------------------------------------------------------------------------------------------------------------------------|------|-----------|------------------------|------------------------|------------------------|--------------------|---|-----------------------|
| GO:0010657 | BP | GO:0010657 | muscle<br>cell<br>apoptotic<br>response<br>to                                                                                                                        | 2/42 | 92/18903  | 0.01778081<br>4989361  | 0.09141367<br>9464823  | 0.06030919<br>7039938  | ATF4/EDN1          | 2 | 0.21739130<br>4347826 |
| GO:1903350 | BP | GO:1903350 | DNA duplex<br>unwinding<br>regulation<br>of anion<br>transport<br>regulation<br>of stress<br>fiber<br>assembly<br>negative<br>regulation<br>of<br>response<br>neural | 2/42 | 92/18903  | 0.01778081<br>4989361  | 0.09141367<br>9464823  | 0.06030919<br>7039938  | ATF4/MAPK1         | 2 | 0.21739130<br>4347826 |
| GO:0032508 | BP | GO:0032508 | crest cell<br>differenti<br>ation<br>heart<br>morphogene<br>sis<br>positive<br>regulation<br>of<br>leukocyte<br>chemotaxis                                           | 2/42 | 93/18903  | 0.01814628<br>87416714 | 0.09273566<br>06738552 | 0.06118135<br>99994138 | TOP2A/RPA1         | 2 | 0.21505376<br>344086  |
| GO:0044070 | BP | GO:0044070 |                                                                                                                                                                      | 2/42 | 93/18903  | 0.01814628<br>87416714 | 0.09273566<br>06738552 | 0.06118135<br>99994138 | ATF4/EDN1          | 2 | 0.21505376<br>344086  |
| GO:0051492 | BP | GO:0051492 |                                                                                                                                                                      | 2/42 | 94/18903  | 0.01851494<br>93967176 | 0.09405814<br>0555432  | 0.06205385<br>19527659 | CLASP2/RGC<br>C    | 2 | 0.21276595<br>7446809 |
| GO:1903035 | BP | GO:1903035 |                                                                                                                                                                      | 2/42 | 94/18903  | 0.01851494<br>93967176 | 0.09405814<br>0555432  | 0.06205385<br>19527659 | CLASP2/EDN<br>1    | 2 | 0.21276595<br>7446809 |
| GO:0014033 | BP | GO:0014033 |                                                                                                                                                                      | 2/42 | 96/18903  | 0.01926177<br>04685055 | 0.09756257<br>70475781 | 0.06436586<br>64363326 | MAPK1/EDN1         | 2 | 0.20833333<br>3333333 |
| GO:0003007 | BP | GO:0003007 |                                                                                                                                                                      | 3/42 | 258/18903 | 0.01950376<br>74117538 | 0.09849690<br>20912168 | 0.06498227<br>73880199 | INSR/MSX1/<br>EDN1 | 3 | 0.11627906<br>9767442 |
| GO:0002690 | BP | GO:0002690 |                                                                                                                                                                      | 2/42 | 97/18903  | 0.01963990<br>05348223 | 0.09860266<br>77877297 | 0.06505205<br>51747626 | MAPK1/EDN1         | 2 | 0.20618556<br>7010309 |

|            |    |            |                                                            |      |           |                        |                        |                        |                         |   |                        |
|------------|----|------------|------------------------------------------------------------|------|-----------|------------------------|------------------------|------------------------|-------------------------|---|------------------------|
| GO:0010596 | BP | GO:0010596 | negative regulation of endothelial cell migration          | 2/42 | 97/18903  | 0.01963990<br>05348223 | 0.09860266<br>77877297 | 0.06505205<br>51747626 | GADD45A/RGCC            | 2 | 0.20618556<br>7010309  |
| GO:0060349 | BP | GO:0060349 | bone morphogenesis                                         | 2/42 | 98/18903  | 0.02002115<br>68027558 | 0.09964017<br>57160403 | 0.06573653<br>99307128 | MSX1/CYP26B1            | 2 | 0.20408163<br>2653061  |
| GO:1990868 | BP | GO:1990868 | response to cellular response                              | 2/42 | 98/18903  | 0.02002115<br>68027558 | 0.09964017<br>57160403 | 0.06573653<br>99307128 | DUSP1/EDN1              | 2 | 0.20408163<br>2653061  |
| GO:1990869 | BP | GO:1990869 | cellular response to positive regulation of growth pattern | 2/42 | 98/18903  | 0.02002115<br>68027558 | 0.09964017<br>57160403 | 0.06573653<br>99307128 | DUSP1/EDN1              | 2 | 0.20408163<br>2653061  |
| GO:0045927 | BP | GO:0045927 | positive regulation of growth pattern                      | 3/42 | 261/18903 | 0.02010280<br>1625369  | 0.09975651<br>12540048 | 0.06581329<br>1057272  | INSR/PAFAH1B1/EDN1      | 3 | 0.11494252<br>8735632  |
| GO:0007389 | BP | GO:0007389 | specificat ion                                             | 4/42 | 472/18903 | 0.02033239<br>563708   | 0.10009815<br>8921129  | 0.06603868<br>94505481 | MSX1/CYP26B1/EDN1/ATM   | 4 | 0.08474576<br>27118644 |
| GO:0006885 | BP | GO:0006885 | regulation of pH                                           | 2/42 | 99/18903  | 0.02040552<br>42193189 | 0.10009815<br>8921129  | 0.06603868<br>94505481 | MAPK1/EDN1              | 2 | 0.20202020<br>2020202  |
| GO:0010389 | BP | GO:0010389 | regulation of G2/M transition of mitotic cell cycle        | 2/42 | 99/18903  | 0.02040552<br>42193189 | 0.10009815<br>8921129  | 0.06603868<br>94505481 | ATM/CDK2                | 2 | 0.20202020<br>2020202  |
| GO:0032392 | BP | GO:0032392 | DNA geometric change                                       | 2/42 | 99/18903  | 0.02040552<br>42193189 | 0.10009815<br>8921129  | 0.06603868<br>94505481 | TOP2A/RPA1              | 2 | 0.20202020<br>2020202  |
| GO:0031667 | BP | GO:0031667 | response to nutrient                                       | 4/42 | 474/18903 | 0.020614833            | 0.10083598<br>3826011  | 0.06652546<br>15379427 | ATF4/RMI1/MAPK1/CYP26B1 | 4 | 0.08438818<br>56540084 |

|            |    |            |                                                                             |      |           |                    |                 |                    |                |   |                   |
|------------|----|------------|-----------------------------------------------------------------------------|------|-----------|--------------------|-----------------|--------------------|----------------|---|-------------------|
| GO:0010769 | BP | GO:0010769 | regulation of cell morphogenesis involved in differentiation                | 2/42 | 100/18903 | 0.0207929877801737 | 0.1009898294445 | 0.0666269595388274 | CUL7/PAPAH1B1  | 2 | 0.2               |
| GO:0030316 | BP | GO:0030316 | osteoclast differentiation                                                  | 2/42 | 100/18903 | 0.0207929877801737 | 0.1009898294445 | 0.0666269595388274 | SNX10/PAPAH1B1 | 2 | 0.2               |
| GO:0032204 | BP | GO:0032204 | regulation of telomere                                                      | 2/42 | 101/18903 | 0.0211835325294974 | 0.1009898294445 | 0.0666269595388274 | MAPK1/ATM      | 2 | 0.198019801980198 |
| GO:0050773 | BP | GO:0050773 | regulation of dendrite                                                      | 2/42 | 103/18903 | 0.0219738060120386 | 0.1009898294445 | 0.0666269595388274 | CUL7/PAPAH1B1  | 2 | 0.194174757281553 |
| GO:0001821 | BP | GO:0001821 | histamine secretion                                                         | 1/42 | 10/18903  | 0.0220030411114478 | 0.1009898294445 | 0.0666269595388274 | EDN1           | 1 | 1                 |
| GO:0003253 | BP | GO:0003253 | cardiac neural crest cell migration involved in outflow tract morphogenesis | 1/42 | 10/18903  | 0.0220030411114478 | 0.1009898294445 | 0.0666269595388274 | EDN1           | 1 | 1                 |
| GO:0003330 | BP | GO:0003330 | regulation of extracellular matrix constituent                              | 1/42 | 10/18903  | 0.0220030411114478 | 0.1009898294445 | 0.0666269595388274 | RGCC           | 1 | 1                 |

|            |    |            |                                            |      |          |                        |                     |                        |          |   |   |
|------------|----|------------|--------------------------------------------|------|----------|------------------------|---------------------|------------------------|----------|---|---|
| GO:0014824 | BP | GO:0014824 | artery<br>smooth<br>muscle                 | 1/42 | 10/18903 | 0.02200304<br>11114478 | 0.10098982<br>94445 | 0.06662695<br>95388274 | EDN1     | 1 | 1 |
| GO:0034397 | BP | GO:0034397 | contractio<br>telomere<br>localizati<br>on | 1/42 | 10/18903 | 0.02200304<br>11114478 | 0.10098982<br>94445 | 0.06662695<br>95388274 | ATM      | 1 | 1 |
| GO:0035878 | BP | GO:0035878 | nail<br>developmen<br>epithelial           | 1/42 | 10/18903 | 0.02200304<br>11114478 | 0.10098982<br>94445 | 0.06662695<br>95388274 | MSX1     | 1 | 1 |
| GO:0042045 | BP | GO:0042045 | fluid<br>transport<br>tongue               | 1/42 | 10/18903 | 0.02200304<br>11114478 | 0.10098982<br>94445 | 0.06662695<br>95388274 | EDN1     | 1 | 1 |
| GO:0043587 | BP | GO:0043587 | morphogene<br>sis<br>sodium-<br>dependent  | 1/42 | 10/18903 | 0.02200304<br>11114478 | 0.10098982<br>94445 | 0.06662695<br>95388274 | CYP26B1  | 1 | 1 |
| GO:0044341 | BP | GO:0044341 | phosphate<br>transport<br>stem cell        | 1/42 | 10/18903 | 0.02200304<br>11114478 | 0.10098982<br>94445 | 0.06662695<br>95388274 | ATF4     | 1 | 1 |
| GO:0048865 | BP | GO:0048865 | fate<br>commitment<br>response             | 1/42 | 10/18903 | 0.02200304<br>11114478 | 0.10098982<br>94445 | 0.06662695<br>95388274 | EDN1     | 1 | 1 |
| GO:0051409 | BP | GO:0051409 | to<br>nitrosativ<br>establishm<br>ent of   | 1/42 | 10/18903 | 0.02200304<br>11114478 | 0.10098982<br>94445 | 0.06662695<br>95388274 | ATM      | 1 | 1 |
| GO:0051660 | BP | GO:0051660 | centrosome<br>localizati<br>on             | 1/42 | 10/18903 | 0.02200304<br>11114478 | 0.10098982<br>94445 | 0.06662695<br>95388274 | PAFAH1B1 | 1 | 1 |
| GO:0060536 | BP | GO:0060536 | cartilage<br>morphogene<br>sis             | 1/42 | 10/18903 | 0.02200304<br>11114478 | 0.10098982<br>94445 | 0.06662695<br>95388274 | MSX1     | 1 | 1 |

|            |    |            |                                                                                     |      |          |                        |                     |                        |      |   |   |
|------------|----|------------|-------------------------------------------------------------------------------------|------|----------|------------------------|---------------------|------------------------|------|---|---|
| GO:0061626 | BP | GO:0061626 | pharyngeal arch artery morphogene regulation of                                     | 1/42 | 10/18903 | 0.02200304<br>11114478 | 0.10098982<br>94445 | 0.06662695<br>95388274 | EDN1 | 1 | 1 |
| GO:0070099 | BP | GO:0070099 | chemokine-mediated signaling pathway                                                | 1/42 | 10/18903 | 0.02200304<br>11114478 | 0.10098982<br>94445 | 0.06662695<br>95388274 | EDN1 | 1 | 1 |
| GO:0070294 | BP | GO:0070294 | renal sodium ion absorption                                                         | 1/42 | 10/18903 | 0.02200304<br>11114478 | 0.10098982<br>94445 | 0.06662695<br>95388274 | EDN1 | 1 | 1 |
| GO:0090220 | BP | GO:0090220 | chromosome localization to nuclear envelope involved in                             | 1/42 | 10/18903 | 0.02200304<br>11114478 | 0.10098982<br>94445 | 0.06662695<br>95388274 | ATM  | 1 | 1 |
| GO:1905461 | BP | GO:1905461 | homologous chromosome positive regulation of vascular associated smooth muscle cell | 1/42 | 10/18903 | 0.02200304<br>11114478 | 0.10098982<br>94445 | 0.06662695<br>95388274 | ATF4 | 1 | 1 |

|            |    |            |                                                                                       |      |           |                    |                   |                    |            |   |                   |
|------------|----|------------|---------------------------------------------------------------------------------------|------|-----------|--------------------|-------------------|--------------------|------------|---|-------------------|
| GO:2000048 | BP | GO:2000048 | negative regulation of cell-cell adhesion mediated by long-term synaptic potentiation | 1/42 | 10/18903  | 0.0220030411114478 | 0.1009898294445   | 0.0666269595388274 | RGCC       | 1 | 1                 |
| GO:0060291 | BP | GO:0060291 | female gonadal development                                                            | 2/42 | 104/18903 | 0.0223735050749902 | 0.102415616813859 | 0.0675676075020109 | PLK2/MAPK1 | 2 | 0.192307692307692 |
| GO:0008585 | BP | GO:0008585 | cellular response to monoamine                                                        | 2/42 | 105/18903 | 0.0227762259856142 | 0.102963482687414 | 0.0679290561507592 | INSR/ATM   | 2 | 0.19047619047619  |
| GO:0071868 | BP | GO:0071868 | cellular response to catecholamine                                                    | 2/42 | 105/18903 | 0.0227762259856142 | 0.102963482687414 | 0.0679290561507592 | ATF4/MAPK1 | 2 | 0.19047619047619  |
| GO:0071870 | BP | GO:0071870 | regulation of signal transduction by p53 class mediator                               | 2/42 | 105/18903 | 0.0227762259856142 | 0.102963482687414 | 0.0679290561507592 | ATF4/MAPK1 | 2 | 0.19047619047619  |
| GO:1901796 | BP | GO:1901796 | DNA conformation change                                                               | 2/42 | 105/18903 | 0.0227762259856142 | 0.102963482687414 | 0.0679290561507592 | MSX1/ATM   | 2 | 0.19047619047619  |
| GO:0071103 | BP | GO:0071103 |                                                                                       | 2/42 | 106/18903 | 0.0231819540286732 | 0.102963482687414 | 0.0679290561507592 | TOP2A/RPA1 | 2 | 0.188679245283019 |

|            |    |            |                                                   |      |           |                        |                       |                        |                        |   |                       |
|------------|----|------------|---------------------------------------------------|------|-----------|------------------------|-----------------------|------------------------|------------------------|---|-----------------------|
| GO:0010717 | BP | GO:0010717 | regulation of epithelial to mesenchymal           | 2/42 | 107/18903 | 0.02359067<br>45366507 | 0.10296348<br>2687414 | 0.06792905<br>61507592 | CLASP2/RGC<br>C        | 2 | 0.18691588<br>7850467 |
| GO:1903532 | BP | GO:1903532 | positive regulation of secretion by cell          | 3/42 | 278/18903 | 0.02368916<br>22876141 | 0.10296348<br>2687414 | 0.06792905<br>61507592 | CLASP2/RGC<br>C/EDN1   | 3 | 0.10791366<br>9064748 |
| GO:0051962 | BP | GO:0051962 | positive regulation of nervous system development | 3/42 | 279/18903 | 0.02391029<br>19206404 | 0.10296348<br>2687414 | 0.06792905<br>61507592 | CUL7/PFAFH<br>1B1/ASPM | 3 | 0.10752688<br>172043  |
| GO:0032231 | BP | GO:0032231 | regulation of actin filament bundle assembly      | 2/42 | 108/18903 | 0.02400237<br>28896203 | 0.10296348<br>2687414 | 0.06792905<br>61507592 | CLASP2/RGC<br>C        | 2 | 0.18518518<br>5185185 |
| GO:0032526 | BP | GO:0032526 | response to retinoic acid                         | 2/42 | 108/18903 | 0.02400237<br>28896203 | 0.10296348<br>2687414 | 0.06792905<br>61507592 | CYP26B1/ATM            | 2 | 0.18518518<br>5185185 |
| GO:0071867 | BP | GO:0071867 | response to retinoic acid                         | 2/42 | 108/18903 | 0.02400237<br>28896203 | 0.10296348<br>2687414 | 0.06792905<br>61507592 | ATF4/MAPK1             | 2 | 0.18518518<br>5185185 |
| GO:0071869 | BP | GO:0071869 | response to catecholamine                         | 2/42 | 108/18903 | 0.02400237<br>28896203 | 0.10296348<br>2687414 | 0.06792905<br>61507592 | ATF4/MAPK1             | 2 | 0.18518518<br>5185185 |
| GO:0003357 | BP | GO:0003357 | noradrenergic neuron differentiation              | 1/42 | 11/18903  | 0.02417717<br>29207595 | 0.10296348<br>2687414 | 0.06792905<br>61507592 | EDN1                   | 1 | 0.90909090<br>9090909 |

|            |    |            |                                                 |      |          |                        |                       |                        |          |   |                       |
|------------|----|------------|-------------------------------------------------|------|----------|------------------------|-----------------------|------------------------|----------|---|-----------------------|
| GO:0008300 | BP | GO:0008300 | isoprenoid<br>catabolic<br>process<br>embryonic | 1/42 | 11/18903 | 0.02417717<br>29207595 | 0.10296348<br>2687414 | 0.06792905<br>61507592 | CYP26B1  | 1 | 0.90909090<br>9090909 |
| GO:0010172 | BP | GO:0010172 | body<br>morphogenesis<br>tonic                  | 1/42 | 11/18903 | 0.02417717<br>29207595 | 0.10296348<br>2687414 | 0.06792905<br>61507592 | CLASP2   | 1 | 0.90909090<br>9090909 |
| GO:0014820 | BP | GO:0014820 | smooth<br>muscle<br>contraction<br>meiotic      | 1/42 | 11/18903 | 0.02417717<br>29207595 | 0.10296348<br>2687414 | 0.06792905<br>61507592 | EDN1     | 1 | 0.90909090<br>9090909 |
| GO:0044771 | BP | GO:0044771 | cell cycle<br>phase<br>transition<br>positive   | 1/42 | 11/18903 | 0.02417717<br>29207595 | 0.10296348<br>2687414 | 0.06792905<br>61507592 | NDC80    | 1 | 0.90909090<br>9090909 |
| GO:0045793 | BP | GO:0045793 | regulation<br>of cell<br>size<br>nuclear        | 1/42 | 11/18903 | 0.02417717<br>29207595 | 0.10296348<br>2687414 | 0.06792905<br>61507592 | EDN1     | 1 | 0.90909090<br>9090909 |
| GO:0051081 | BP | GO:0051081 | membrane<br>disassembly<br>Bergmann             | 1/42 | 11/18903 | 0.02417717<br>29207595 | 0.10296348<br>2687414 | 0.06792905<br>61507592 | PAFAH1B1 | 1 | 0.90909090<br>9090909 |
| GO:0060020 | BP | GO:0060020 | glial cell<br>differentiation                   | 1/42 | 11/18903 | 0.02417717<br>29207595 | 0.10296348<br>2687414 | 0.06792905<br>61507592 | MAPK1    | 1 | 0.90909090<br>9090909 |
| GO:0060439 | BP | GO:0060439 | trachea<br>morphogenesis<br>regulation<br>of    | 1/42 | 11/18903 | 0.02417717<br>29207595 | 0.10296348<br>2687414 | 0.06792905<br>61507592 | MAPK1    | 1 | 0.90909090<br>9090909 |
| GO:0060623 | BP | GO:0060623 | chromosome<br>condensation                      | 1/42 | 11/18903 | 0.02417717<br>29207595 | 0.10296348<br>2687414 | 0.06792905<br>61507592 | SMC4     | 1 | 0.90909090<br>9090909 |

|            |    |            |                                                                                              |      |          |                        |                       |                        |        |   |                       |
|------------|----|------------|----------------------------------------------------------------------------------------------|------|----------|------------------------|-----------------------|------------------------|--------|---|-----------------------|
| GO:0071044 | BP | GO:0071044 | histone<br>mRNA<br>catabolic<br>process                                                      | 1/42 | 11/18903 | 0.02417717<br>29207595 | 0.10296348<br>2687414 | 0.06792905<br>61507592 | ATM    | 1 | 0.90909090<br>9090909 |
| GO:0072584 | BP | GO:0072584 | caveolin-<br>mediated<br>endocytosi<br>endothelin                                            | 1/42 | 11/18903 | 0.02417717<br>29207595 | 0.10296348<br>2687414 | 0.06792905<br>61507592 | MAPK1  | 1 | 0.90909090<br>9090909 |
| GO:0086100 | BP | GO:0086100 | receptor<br>signaling<br>pathway<br>regulation<br>of                                         | 1/42 | 11/18903 | 0.02417717<br>29207595 | 0.10296348<br>2687414 | 0.06792905<br>61507592 | EDN1   | 1 | 0.90909090<br>9090909 |
| GO:0110011 | BP | GO:0110011 | basement<br>membrane<br>organizati<br>positive<br>regulation<br>of<br>transcript<br>ion from | 1/42 | 11/18903 | 0.02417717<br>29207595 | 0.10296348<br>2687414 | 0.06792905<br>61507592 | CLASP2 | 1 | 0.90909090<br>9090909 |
| GO:1990440 | BP | GO:1990440 | RNA<br>polymerase<br>II<br>promoter<br>in<br>response<br>to                                  | 1/42 | 11/18903 | 0.02417717<br>29207595 | 0.10296348<br>2687414 | 0.06792905<br>61507592 | ATF4   | 1 | 0.90909090<br>9090909 |
| GO:1990535 | BP | GO:1990535 | neuron<br>projection<br>maintenanc                                                           | 1/42 | 11/18903 | 0.02417717<br>29207595 | 0.10296348<br>2687414 | 0.06792905<br>61507592 | INSR   | 1 | 0.90909090<br>9090909 |

|            |    |            |                                                       |      |           |                        |                       |                        |                     |   |                       |
|------------|----|------------|-------------------------------------------------------|------|-----------|------------------------|-----------------------|------------------------|---------------------|---|-----------------------|
| GO:0030038 | BP | GO:0030038 | contractile actin filament bundle assembly stress     | 2/42 | 109/18903 | 0.02441703<br>45151142 | 0.10321472<br>3678705 | 0.06809480<br>97068682 | CLASP2/RGC<br>C     | 2 | 0.18348623<br>853211  |
| GO:0043149 | BP | GO:0043149 | fiber assembly development of                         | 2/42 | 109/18903 | 0.02441703<br>45151142 | 0.10321472<br>3678705 | 0.06809480<br>97068682 | CLASP2/RGC<br>C     | 2 | 0.18348623<br>853211  |
| GO:0046545 | BP | GO:0046545 | primary female sexual characteri                      | 2/42 | 109/18903 | 0.02441703<br>45151142 | 0.10321472<br>3678705 | 0.06809480<br>97068682 | INSR/ATM            | 2 | 0.18348623<br>853211  |
| GO:1902749 | BP | GO:1902749 | regulation of cell cycle G2/M phase transition        | 2/42 | 110/18903 | 0.02483464<br>48879932 | 0.10472145<br>8246907 | 0.06908886<br>17184774 | ATM/CDK2            | 2 | 0.18181818<br>1818182 |
| GO:0014066 | BP | GO:0014066 | regulation of phosphatidylinositol 3-kinase signaling | 2/42 | 111/18903 | 0.02525518<br>95303161 | 0.10623313<br>1390421 | 0.07008617<br>19023128 | CEP55/INSR          | 2 | 0.18018018<br>018018  |
| GO:0006260 | BP | GO:0006260 | DNA replication sex                                   | 3/42 | 286/18903 | 0.02548984<br>32013768 | 0.10695738<br>1276365 | 0.07056398<br>80161953 | RMI1/RPA1/<br>CDK2  | 3 | 0.10489510<br>4895105 |
| GO:0007548 | BP | GO:0007548 | differentiation cellular response to oxidative        | 3/42 | 288/18903 | 0.02595131<br>28509665 | 0.10739370<br>4410082 | 0.07085184<br>75356724 | INSR/ASPM/<br>ATM   | 3 | 0.10416666<br>6666667 |
| GO:0034599 | BP | GO:0034599 | response to oxidative                                 | 3/42 | 288/18903 | 0.02595131<br>28509665 | 0.10739370<br>4410082 | 0.07085184<br>75356724 | ATF4/MAPK1<br>/EDN1 | 3 | 0.10416666<br>6666667 |

|            |    |            |                                                                               |      |           |                        |                       |                        |                  |   |                       |
|------------|----|------------|-------------------------------------------------------------------------------|------|-----------|------------------------|-----------------------|------------------------|------------------|---|-----------------------|
| GO:0010633 | BP | GO:0010633 | negative regulation of epithelial cell migration                              | 2/42 | 113/18903 | 0.02610502<br>39467401 | 0.10739370<br>4410082 | 0.07085184<br>75356724 | GADD45A/RG<br>CC | 2 | 0.17699115<br>0442478 |
| GO:1904659 | BP | GO:1904659 | glucose transmembrane transport                                               | 2/42 | 113/18903 | 0.02610502<br>39467401 | 0.10739370<br>4410082 | 0.07085184<br>75356724 | INSR/EDN1        | 2 | 0.17699115<br>0442478 |
| GO:0002327 | BP | GO:0002327 | immature B cell differentiation                                               | 1/42 | 12/18903  | 0.02634658<br>63622864 | 0.10739370<br>4410082 | 0.07085184<br>75356724 | ATM              | 1 | 0.83333333<br>3333333 |
| GO:0030397 | BP | GO:0030397 | membrane disassembly                                                          | 1/42 | 12/18903  | 0.02634658<br>63622864 | 0.10739370<br>4410082 | 0.07085184<br>75356724 | PAFAH1B1         | 1 | 0.83333333<br>3333333 |
| GO:0035815 | BP | GO:0035815 | positive regulation of renal sodium excretion                                 | 1/42 | 12/18903  | 0.02634658<br>63622864 | 0.10739370<br>4410082 | 0.07085184<br>75356724 | EDN1             | 1 | 0.83333333<br>3333333 |
| GO:0061309 | BP | GO:0061309 | cardiac neural crest cell development involved in outflow tract morphogenesis | 1/42 | 12/18903  | 0.02634658<br>63622864 | 0.10739370<br>4410082 | 0.07085184<br>75356724 | EDN1             | 1 | 0.83333333<br>3333333 |
| GO:0061517 | BP | GO:0061517 | macrophage proliferation                                                      | 1/42 | 12/18903  | 0.02634658<br>63622864 | 0.10739370<br>4410082 | 0.07085184<br>75356724 | MAPK1            | 1 | 0.83333333<br>3333333 |

|            |    |            |                                                                                                                                          |      |           |                        |                       |                        |                       |   |                       |
|------------|----|------------|------------------------------------------------------------------------------------------------------------------------------------------|------|-----------|------------------------|-----------------------|------------------------|-----------------------|---|-----------------------|
| GO:0071372 | BP | GO:0071372 | cellular response to follicle-stimulating hormone positive regulation of spindle checkpoint                                              | 1/42 | 12/18903  | 0.02634658<br>63622864 | 0.10739370<br>4410082 | 0.07085184<br>75356724 | EDN1                  | 1 | 0.83333333<br>3333333 |
| GO:0090232 | BP | GO:0090232 | positive regulation of mitotic cell cycle spindle assembly checkpoint striated muscle cell differentiation embryonic organ morphogenesis | 1/42 | 12/18903  | 0.02634658<br>63622864 | 0.10739370<br>4410082 | 0.07085184<br>75356724 | NDC80                 | 1 | 0.83333333<br>3333333 |
| GO:0090267 | BP | GO:0090267 | hexose transmembrane transport cerebral cortex development                                                                               | 1/42 | 12/18903  | 0.02634658<br>63622864 | 0.10739370<br>4410082 | 0.07085184<br>75356724 | NDC80                 | 1 | 0.83333333<br>3333333 |
| GO:0051146 | BP | GO:0051146 | muscle cell differentiation embryonic organ morphogenesis                                                                                | 3/42 | 293/18903 | 0.02712475<br>00798357 | 0.11030302<br>1702325 | 0.07277123<br>84939709 | MSX1/CYP26<br>B1/EDN1 | 3 | 0.10238907<br>8498294 |
| GO:0048562 | BP | GO:0048562 | organ morphogenesis                                                                                                                      | 3/42 | 294/18903 | 0.02736282<br>39588843 | 0.11068329<br>0073915 | 0.07302211<br>64838358 | MSX1/MAPK1<br>/EDN1   | 3 | 0.10204081<br>6326531 |
| GO:0008645 | BP | GO:0008645 | hexose transmembrane transport cerebral cortex development                                                                               | 2/42 | 116/18903 | 0.02740142<br>33431703 | 0.11068329<br>0073915 | 0.07302211<br>64838358 | INSR/EDN1             | 2 | 0.17241379<br>3103448 |
| GO:0021987 | BP | GO:0021987 | hexose transmembrane transport cerebral cortex development                                                                               | 2/42 | 117/18903 | 0.02783927<br>21921546 | 0.11068329<br>0073915 | 0.07302211<br>64838358 | PAFAH1B1/A<br>SPM     | 2 | 0.17094017<br>0940171 |

|            |    |            |                                                      |      |           |                        |                       |                        |                   |   |                       |
|------------|----|------------|------------------------------------------------------|------|-----------|------------------------|-----------------------|------------------------|-------------------|---|-----------------------|
| GO:0043406 | BP | GO:0043406 | positive regulation of MAP kinase activity embryonic | 2/42 | 117/18903 | 0.02783927<br>21921546 | 0.11068329<br>0073915 | 0.07302211<br>64838358 | INSR/EDN1         | 2 | 0.17094017<br>0940171 |
| GO:0030326 | BP | GO:0030326 | limb morphogenesis embryonic                         | 2/42 | 118/18903 | 0.02827995<br>52756678 | 0.11068329<br>0073915 | 0.07302211<br>64838358 | MSX1/CYP26<br>B1  | 2 | 0.16949152<br>5423729 |
| GO:0035113 | BP | GO:0035113 | appendage morphogenesis embryonic                    | 2/42 | 118/18903 | 0.02827995<br>52756678 | 0.11068329<br>0073915 | 0.07302211<br>64838358 | MSX1/CYP26<br>B1  | 2 | 0.16949152<br>5423729 |
| GO:0097193 | BP | GO:0097193 | intrinsic apoptotic signaling pathway renal          | 3/42 | 298/18903 | 0.02832639<br>95938652 | 0.11068329<br>0073915 | 0.07302211<br>64838358 | ATF4/MSX1/<br>ATM | 3 | 0.10067114<br>0939597 |
| GO:0003096 | BP | GO:0003096 | sodium ion transport female                          | 1/42 | 13/18903  | 0.02851129<br>14267502 | 0.11068329<br>0073915 | 0.07302211<br>64838358 | EDN1              | 1 | 0.76923076<br>9230769 |
| GO:0007144 | BP | GO:0007144 | meiosis I positive regulation of urine volume fat-   | 1/42 | 13/18903  | 0.02851129<br>14267502 | 0.11068329<br>0073915 | 0.07302211<br>64838358 | NDC80             | 1 | 0.76923076<br>9230769 |
| GO:0035810 | BP | GO:0035810 | soluble vitamin catabolic histamine transport        | 1/42 | 13/18903  | 0.02851129<br>14267502 | 0.11068329<br>0073915 | 0.07302211<br>64838358 | EDN1              | 1 | 0.76923076<br>9230769 |
| GO:0042363 | BP | GO:0042363 | soluble vitamin catabolic histamine transport        | 1/42 | 13/18903  | 0.02851129<br>14267502 | 0.11068329<br>0073915 | 0.07302211<br>64838358 | CYP26B1           | 1 | 0.76923076<br>9230769 |
| GO:0051608 | BP | GO:0051608 | histamine transport                                  | 1/42 | 13/18903  | 0.02851129<br>14267502 | 0.11068329<br>0073915 | 0.07302211<br>64838358 | EDN1              | 1 | 0.76923076<br>9230769 |

|            |    |            |                                                                                       |      |          |                        |                       |                        |      |   |                       |
|------------|----|------------|---------------------------------------------------------------------------------------|------|----------|------------------------|-----------------------|------------------------|------|---|-----------------------|
| GO:0071287 | BP | GO:0071287 | cellular response to manganese cellular response to                                   | 1/42 | 13/18903 | 0.02851129<br>14267502 | 0.11068329<br>0073915 | 0.07302211<br>64838358 | ATF4 | 1 | 0.76923076<br>9230769 |
| GO:0071389 | BP | GO:0071389 | mineralocorticoid cellular response to                                                | 1/42 | 13/18903 | 0.02851129<br>14267502 | 0.11068329<br>0073915 | 0.07302211<br>64838358 | EDN1 | 1 | 0.76923076<br>9230769 |
| GO:0071481 | BP | GO:0071481 | fibroblast activation regulation of DNA catabolic process                             | 1/42 | 13/18903 | 0.02851129<br>14267502 | 0.11068329<br>0073915 | 0.07302211<br>64838358 | ATM  | 1 | 0.76923076<br>9230769 |
| GO:0072537 | BP | GO:0072537 | regulation of gonad development cellular response to leucine starvation regulation of | 1/42 | 13/18903 | 0.02851129<br>14267502 | 0.11068329<br>0073915 | 0.07302211<br>64838358 | RGCC | 1 | 0.76923076<br>9230769 |
| GO:1903624 | BP | GO:1903624 | mesenchymal cell apoptotic process                                                    | 1/42 | 13/18903 | 0.02851129<br>14267502 | 0.11068329<br>0073915 | 0.07302211<br>64838358 | ATM  | 1 | 0.76923076<br>9230769 |
| GO:1905939 | BP | GO:1905939 |                                                                                       | 1/42 | 13/18903 | 0.02851129<br>14267502 | 0.11068329<br>0073915 | 0.07302211<br>64838358 | INSR | 1 | 0.76923076<br>9230769 |
| GO:1990253 | BP | GO:1990253 |                                                                                       | 1/42 | 13/18903 | 0.02851129<br>14267502 | 0.11068329<br>0073915 | 0.07302211<br>64838358 | ATF4 | 1 | 0.76923076<br>9230769 |
| GO:2001053 | BP | GO:2001053 |                                                                                       | 1/42 | 13/18903 | 0.02851129<br>14267502 | 0.11068329<br>0073915 | 0.07302211<br>64838358 | MSX1 | 1 | 0.76923076<br>9230769 |

|            |    |            |                                                                 |      |           |                        |                       |                        |                      |   |                        |
|------------|----|------------|-----------------------------------------------------------------|------|-----------|------------------------|-----------------------|------------------------|----------------------|---|------------------------|
| GO:0015749 | BP | GO:0015749 | monosaccharide transmembrane transport                          | 2/42 | 119/18903 | 0.02872345<br>84887032 | 0.11125466<br>2743574 | 0.07339907<br>34898274 | INSR/EDN1            | 2 | 0.16806722<br>6890756  |
| GO:0007613 | BP | GO:0007613 | memory                                                          | 2/42 | 120/18903 | 0.02916976<br>77722942 | 0.11272831<br>2474419 | 0.07437129<br>81339473 | INSR/PLK2            | 2 | 0.16666666<br>6666667  |
| GO:0051047 | BP | GO:0051047 | positive regulation of secretion                                | 3/42 | 304/18903 | 0.02980557<br>00134846 | 0.11292314<br>4774683 | 0.07449983<br>66596377 | CLASP2/RGC<br>C/EDN1 | 3 | 0.09868421<br>05263158 |
| GO:0048675 | BP | GO:0048675 | axon extension                                                  | 2/42 | 122/18903 | 0.03007074<br>85447176 | 0.11292314<br>4774683 | 0.07449983<br>66596377 | PAFAH1B1/<br>DN1     | 2 | 0.16393442<br>6229508  |
| GO:0071901 | BP | GO:0071901 | negative regulation of protein serine/threonine kinase activity | 2/42 | 122/18903 | 0.03007074<br>85447176 | 0.11292314<br>4774683 | 0.07449983<br>66596377 | GADD45A/<br>DU SP1   | 2 | 0.16393442<br>6229508  |
| GO:0048608 | BP | GO:0048608 | reproductive structure                                          | 3/42 | 306/18903 | 0.03030763<br>06737096 | 0.11292314<br>4774683 | 0.07449983<br>66596377 | INSR/ASPM/<br>ATM    | 3 | 0.09803921<br>56862745 |
| GO:0030282 | BP | GO:0030282 | bone mineralization                                             | 2/42 | 123/18903 | 0.03052539<br>21446769 | 0.11292314<br>4774683 | 0.07449983<br>66596377 | ATF4/SNX10           | 2 | 0.16260162<br>601626   |
| GO:0071675 | BP | GO:0071675 | regulation of mononuclear cell migration                        | 2/42 | 123/18903 | 0.03052539<br>21446769 | 0.11292314<br>4774683 | 0.07449983<br>66596377 | DUSP1/<br>MAPK1      | 2 | 0.16260162<br>601626   |

|            |    |            |                                                                                       |      |           |                    |                   |                    |                   |   |                    |
|------------|----|------------|---------------------------------------------------------------------------------------|------|-----------|--------------------|-------------------|--------------------|-------------------|---|--------------------|
| GO:0010720 | BP | GO:0010720 | positive regulation of cell development                                               | 3/42 | 307/18903 | 0.0305603474072761 | 0.112923144774683 | 0.0744998366596377 | CUL7/PFAH1B1/ASPM | 3 | 0.0977198697068404 |
| GO:0007100 | BP | GO:0007100 | mitotic centrosome separation layer formation in cerebral corpus callosum development | 1/42 | 14/18903  | 0.0306712980842451 | 0.112923144774683 | 0.0744998366596377 | KIF11             | 1 | 0.714285714285714  |
| GO:0021819 | BP | GO:0021819 | male sex determination regulation of prostaglandin secretion                          | 1/42 | 14/18903  | 0.0306712980842451 | 0.112923144774683 | 0.0744998366596377 | PFAH1B1           | 1 | 0.714285714285714  |
| GO:0022038 | BP | GO:0022038 | positive regulation of prostaglandin secretion                                        | 1/42 | 14/18903  | 0.0306712980842451 | 0.112923144774683 | 0.0744998366596377 | PFAH1B1           | 1 | 0.714285714285714  |
| GO:0030238 | BP | GO:0030238 | regulation of prostaglandin secretion                                                 | 1/42 | 14/18903  | 0.0306712980842451 | 0.112923144774683 | 0.0744998366596377 | INSR              | 1 | 0.714285714285714  |
| GO:0032306 | BP | GO:0032306 | positive regulation of prostaglandin secretion                                        | 1/42 | 14/18903  | 0.0306712980842451 | 0.112923144774683 | 0.0744998366596377 | EDN1              | 1 | 0.714285714285714  |
| GO:0032308 | BP | GO:0032308 | regulation of prostaglandin secretion                                                 | 1/42 | 14/18903  | 0.0306712980842451 | 0.112923144774683 | 0.0744998366596377 | EDN1              | 1 | 0.714285714285714  |
| GO:0032486 | BP | GO:0032486 | protein signal transduction                                                           | 1/42 | 14/18903  | 0.0306712980842451 | 0.112923144774683 | 0.0744998366596377 | PLK2              | 1 | 0.714285714285714  |

|            |    |            |                                                                                                                                                |      |          |                        |                       |                        |       |   |                       |
|------------|----|------------|------------------------------------------------------------------------------------------------------------------------------------------------|------|----------|------------------------|-----------------------|------------------------|-------|---|-----------------------|
| GO:0035630 | BP | GO:0035630 | bone mineralization involved in bone maturation                                                                                                | 1/42 | 14/18903 | 0.03067129<br>80842451 | 0.11292314<br>4774683 | 0.07449983<br>66596377 | SNX10 | 1 | 0.71428571<br>4285714 |
| GO:0051231 | BP | GO:0051231 | spindle elongation Golgi                                                                                                                       | 1/42 | 14/18903 | 0.03067129<br>80842451 | 0.11292314<br>4774683 | 0.07449983<br>66596377 | KIF11 | 1 | 0.71428571<br>4285714 |
| GO:0051645 | BP | GO:0051645 | localization                                                                                                                                   | 1/42 | 14/18903 | 0.03067129<br>80842451 | 0.11292314<br>4774683 | 0.07449983<br>66596377 | UVRAG | 1 | 0.71428571<br>4285714 |
| GO:0055057 | BP | GO:0055057 | neuroblast division extracellular matrix constituent                                                                                           | 1/42 | 14/18903 | 0.03067129<br>80842451 | 0.11292314<br>4774683 | 0.07449983<br>66596377 | ASPM  | 1 | 0.71428571<br>4285714 |
| GO:0070278 | BP | GO:0070278 | lens fiber cell development semaphorin-plexin signaling pathway involved in axon guidance positive regulation of DNA-templated DNA replication | 1/42 | 14/18903 | 0.03067129<br>80842451 | 0.11292314<br>4774683 | 0.07449983<br>66596377 | RGCC  | 1 | 0.71428571<br>4285714 |
| GO:0070307 | BP | GO:0070307 | lens fiber cell development semaphorin-plexin signaling pathway involved in axon guidance positive regulation of DNA-templated DNA replication | 1/42 | 14/18903 | 0.03067129<br>80842451 | 0.11292314<br>4774683 | 0.07449983<br>66596377 | ATF4  | 1 | 0.71428571<br>4285714 |
| GO:1902287 | BP | GO:1902287 | lens fiber cell development semaphorin-plexin signaling pathway involved in axon guidance positive regulation of DNA-templated DNA replication | 1/42 | 14/18903 | 0.03067129<br>80842451 | 0.11292314<br>4774683 | 0.07449983<br>66596377 | EDN1  | 1 | 0.71428571<br>4285714 |
| GO:2000105 | BP | GO:2000105 | lens fiber cell development semaphorin-plexin signaling pathway involved in axon guidance positive regulation of DNA-templated DNA replication | 1/42 | 14/18903 | 0.03067129<br>80842451 | 0.11292314<br>4774683 | 0.07449983<br>66596377 | CDK2  | 1 | 0.71428571<br>4285714 |

|            |    |            |                                         |      |           |                    |                   |                    |                      |   |                    |
|------------|----|------------|-----------------------------------------|------|-----------|--------------------|-------------------|--------------------|----------------------|---|--------------------|
| GO:0007162 | BP | GO:0007162 | negative regulation of cell adhesion    | 3/42 | 308/18903 | 0.0308141878204113 | 0.1132057715634   | 0.0746862966598178 | DUSP1/CLASP2/RGCC    | 3 | 0.0974025974025974 |
| GO:0046660 | BP | GO:0046660 | female sex differentiation              | 2/42 | 124/18903 | 0.0309827860371934 | 0.113581434037848 | 0.0749341359583197 | INSR/ATM             | 2 | 0.161290322580645  |
| GO:0055074 | BP | GO:0055074 | calcium ion                             | 3/42 | 309/18903 | 0.0310691514524035 | 0.113654673689134 | 0.0749824550347031 | ATF4/SNX10/EDN1      | 3 | 0.0970873786407767 |
| GO:0042063 | BP | GO:0042063 | gliogenesis                             | 3/42 | 310/18903 | 0.0313252378277166 | 0.114103845023512 | 0.0752787910171106 | MAPK1/PAFAH1B1/NDRG1 | 3 | 0.0967741935483871 |
| GO:0061458 | BP | GO:0061458 | reproductive system development         | 3/42 | 310/18903 | 0.0313252378277166 | 0.114103845023512 | 0.0752787910171106 | INSR/ASPM/ATM        | 3 | 0.0967741935483871 |
| GO:0003014 | BP | GO:0003014 | renal system process                    | 2/42 | 125/18903 | 0.0314429163916031 | 0.114289326671814 | 0.0754011605502069 | EDN1/AKAP11          | 2 | 0.16               |
| GO:0006650 | BP | GO:0006650 | glycerophospholipid metabolic process   | 3/42 | 311/18903 | 0.031582446456076  | 0.114553280366106 | 0.0755753011761141 | UVRAG/PAFAH1B1/ATM   | 3 | 0.0964630225080386 |
| GO:0001768 | BP | GO:0001768 | establishment of T cell polarity        | 1/42 | 15/18903  | 0.0328266162842801 | 0.114692177711607 | 0.0756669372138185 | CYP26B1              | 1 | 0.6666666666666667 |
| GO:0006206 | BP | GO:0006206 | pyrimidine nucleobase metabolic process | 1/42 | 15/18903  | 0.0328266162842801 | 0.114692177711607 | 0.0756669372138185 | MAPK1                | 1 | 0.6666666666666667 |
| GO:0007567 | BP | GO:0007567 | parturition                             | 1/42 | 15/18903  | 0.0328266162842801 | 0.114692177711607 | 0.0756669372138185 | EDN1                 | 1 | 0.6666666666666667 |
| GO:0009111 | BP | GO:0009111 | vitamin catabolic process               | 1/42 | 15/18903  | 0.0328266162842801 | 0.114692177711607 | 0.0756669372138185 | CYP26B1              | 1 | 0.6666666666666667 |

|            |    |            |                                                                    |      |          |                        |                       |                        |          |   |                       |
|------------|----|------------|--------------------------------------------------------------------|------|----------|------------------------|-----------------------|------------------------|----------|---|-----------------------|
| GO:0010457 | BP | GO:0010457 | centriole-<br>centriole<br>cohesion                                | 1/42 | 15/18903 | 0.03282661<br>62842801 | 0.11469217<br>7711607 | 0.07566693<br>72138185 | CCDC102B | 1 | 0.66666666<br>6666667 |
| GO:0014029 | BP | GO:0014029 | neural<br>crest<br>formation                                       | 1/42 | 15/18903 | 0.03282661<br>62842801 | 0.11469217<br>7711607 | 0.07566693<br>72138185 | EDN1     | 1 | 0.66666666<br>6666667 |
| GO:0030174 | BP | GO:0030174 | regulation<br>of DNA-<br>templated<br>DNA<br>replicatio<br>n       | 1/42 | 15/18903 | 0.03282661<br>62842801 | 0.11469217<br>7711607 | 0.07566693<br>72138185 | CDK2     | 1 | 0.66666666<br>6666667 |
| GO:0031453 | BP | GO:0031453 | positive<br>regulation<br>of<br>heterochro<br>matin<br>formation   | 1/42 | 15/18903 | 0.03282661<br>62842801 | 0.11469217<br>7711607 | 0.07566693<br>72138185 | CDK2     | 1 | 0.66666666<br>6666667 |
| GO:0034392 | BP | GO:0034392 | negative<br>regulation<br>of smooth<br>muscle<br>cell<br>apoptotic | 1/42 | 15/18903 | 0.03282661<br>62842801 | 0.11469217<br>7711607 | 0.07566693<br>72138185 | EDN1     | 1 | 0.66666666<br>6666667 |
| GO:0045725 | BP | GO:0045725 | positive<br>regulation<br>of<br>glycogen<br>biosynthes             | 1/42 | 15/18903 | 0.03282661<br>62842801 | 0.11469217<br>7711607 | 0.07566693<br>72138185 | INSR     | 1 | 0.66666666<br>6666667 |
| GO:0048308 | BP | GO:0048308 | organelle<br>inheritanc                                            | 1/42 | 15/18903 | 0.03282661<br>62842801 | 0.11469217<br>7711607 | 0.07566693<br>72138185 | MAPK1    | 1 | 0.66666666<br>6666667 |
| GO:0048313 | BP | GO:0048313 | Golgi<br>inheritanc                                                | 1/42 | 15/18903 | 0.03282661<br>62842801 | 0.11469217<br>7711607 | 0.07566693<br>72138185 | MAPK1    | 1 | 0.66666666<br>6666667 |

|            |    |            |                                                     |      |           |                        |                       |                        |                  |   |                        |
|------------|----|------------|-----------------------------------------------------|------|-----------|------------------------|-----------------------|------------------------|------------------|---|------------------------|
| GO:0051299 | BP | GO:0051299 | centrosome separation                               | 1/42 | 15/18903  | 0.03282661<br>62842801 | 0.11469217<br>7711607 | 0.07566693<br>72138185 | KIF11            | 1 | 0.66666666<br>6666667  |
| GO:0070262 | BP | GO:0070262 | serine dephosphorylation                            | 1/42 | 15/18903  | 0.03282661<br>62842801 | 0.11469217<br>7711607 | 0.07566693<br>72138185 | DUSP1            | 1 | 0.66666666<br>6666667  |
| GO:0070831 | BP | GO:0070831 | basement membrane assembly                          | 1/42 | 15/18903  | 0.03282661<br>62842801 | 0.11469217<br>7711607 | 0.07566693<br>72138185 | CLASP2           | 1 | 0.66666666<br>6666667  |
| GO:0097152 | BP | GO:0097152 | mesenchymal cell apoptotic process                  | 1/42 | 15/18903  | 0.03282661<br>62842801 | 0.11469217<br>7711607 | 0.07566693<br>72138185 | MSX1             | 1 | 0.66666666<br>6666667  |
| GO:0120263 | BP | GO:0120263 | positive regulation of heterochromatin organization | 1/42 | 15/18903  | 0.03282661<br>62842801 | 0.11469217<br>7711607 | 0.07566693<br>72138185 | CDK2             | 1 | 0.66666666<br>6666667  |
| GO:1904936 | BP | GO:1904936 | interneuron positive regulation                     | 1/42 | 15/18903  | 0.03282661<br>62842801 | 0.11469217<br>7711607 | 0.07566693<br>72138185 | PAFAH1B1         | 1 | 0.66666666<br>6666667  |
| GO:0045931 | BP | GO:0045931 | of mitotic cell cycle regulation                    | 2/42 | 129/18903 | 0.03331052<br>73971648 | 0.11590980<br>2650297 | 0.07647025<br>22403891 | PAFAH1B1/RGCC    | 2 | 0.15503875<br>9689922  |
| GO:2000027 | BP | GO:2000027 | of animal organ morphogenesis                       | 2/42 | 129/18903 | 0.03331052<br>73971648 | 0.11590980<br>2650297 | 0.07647025<br>22403891 | MSX1/EDN1        | 2 | 0.15503875<br>9689922  |
| GO:0019058 | BP | GO:0019058 | viral life cycle                                    | 3/42 | 319/18903 | 0.03368045<br>29640083 | 0.11695930<br>1165076 | 0.07716264<br>76574804 | TOP2A/INSR/UVRAG | 3 | 0.09404388<br>71473354 |

|            |    |            |                                                                                                                                                                                 |      |           |                        |                       |                        |            |   |                       |
|------------|----|------------|---------------------------------------------------------------------------------------------------------------------------------------------------------------------------------|------|-----------|------------------------|-----------------------|------------------------|------------|---|-----------------------|
| GO:0071621 | BP | GO:0071621 | granulocyte<br>positive<br>regulation<br>of<br>endothelial<br>cell<br>migration<br>carbohydrate<br>transport<br>establishment<br>of<br>lymphocyte<br>polarity                   | 2/42 | 130/18903 | 0.03378413<br>41816044 | 0.11708185<br>773058  | 0.07724350<br>30404038 | MAPK1/EDN1 | 2 | 0.15384615<br>3846154 |
| GO:0010595 | BP | GO:0010595 | DNA<br>ligation<br>regulation<br>of<br>extracellular<br>matrix<br>disassembly<br>positive<br>regulation<br>of smooth<br>muscle<br>cell<br>apoptotic<br>lipoprotein<br>catabolic | 2/42 | 131/18903 | 0.03426039<br>53905225 | 0.11810860<br>3937605 | 0.07792088<br>78658693 | PLK2/EDN1  | 2 | 0.15267175<br>5725191 |
| GO:0034219 | BP | GO:0034219 | transmembrane<br>transport<br>establishment<br>of<br>lymphocyte<br>polarity                                                                                                     | 2/42 | 132/18903 | 0.03473929<br>75076178 | 0.11810860<br>3937605 | 0.07792088<br>78658693 | INSR/EDN1  | 2 | 0.15151515<br>1515152 |
| GO:0001767 | BP | GO:0001767 | DNA<br>ligation<br>regulation<br>of<br>extracellular<br>matrix<br>disassembly<br>positive<br>regulation<br>of smooth<br>muscle<br>cell<br>apoptotic<br>lipoprotein<br>catabolic | 1/42 | 16/18903  | 0.03497725<br>5955821  | 0.11810860<br>3937605 | 0.07792088<br>78658693 | CYP26B1    | 1 | 0.625                 |
| GO:0006266 | BP | GO:0006266 | DNA<br>ligation<br>regulation<br>of<br>extracellular<br>matrix<br>disassembly<br>positive<br>regulation<br>of smooth<br>muscle<br>cell<br>apoptotic<br>lipoprotein<br>catabolic | 1/42 | 16/18903  | 0.03497725<br>5955821  | 0.11810860<br>3937605 | 0.07792088<br>78658693 | TOP2A      | 1 | 0.625                 |
| GO:0010715 | BP | GO:0010715 | DNA<br>ligation<br>regulation<br>of<br>extracellular<br>matrix<br>disassembly<br>positive<br>regulation<br>of smooth<br>muscle<br>cell<br>apoptotic<br>lipoprotein<br>catabolic | 1/42 | 16/18903  | 0.03497725<br>5955821  | 0.11810860<br>3937605 | 0.07792088<br>78658693 | CLASP2     | 1 | 0.625                 |
| GO:0034393 | BP | GO:0034393 | DNA<br>ligation<br>regulation<br>of<br>extracellular<br>matrix<br>disassembly<br>positive<br>regulation<br>of smooth<br>muscle<br>cell<br>apoptotic<br>lipoprotein<br>catabolic | 1/42 | 16/18903  | 0.03497725<br>5955821  | 0.11810860<br>3937605 | 0.07792088<br>78658693 | ATF4       | 1 | 0.625                 |
| GO:0042159 | BP | GO:0042159 | DNA<br>ligation<br>regulation<br>of<br>extracellular<br>matrix<br>disassembly<br>positive<br>regulation<br>of smooth<br>muscle<br>cell<br>apoptotic<br>lipoprotein<br>catabolic | 1/42 | 16/18903  | 0.03497725<br>5955821  | 0.11810860<br>3937605 | 0.07792088<br>78658693 | ATM        | 1 | 0.625                 |

|            |    |            |                                                                                      |      |          |                       |                       |                        |         |   |       |
|------------|----|------------|--------------------------------------------------------------------------------------|------|----------|-----------------------|-----------------------|------------------------|---------|---|-------|
| GO:0042249 | BP | GO:0042249 | establishment of planar polarity of embryonic positive regulation                    | 1/42 | 16/18903 | 0.03497725<br>5955821 | 0.11810860<br>3937605 | 0.07792088<br>78658693 | PFAH1B1 | 1 | 0.625 |
| GO:0045836 | BP | GO:0045836 | regulation of meiotic nuclear division                                               | 1/42 | 16/18903 | 0.03497725<br>5955821 | 0.11810860<br>3937605 | 0.07792088<br>78658693 | MSX1    | 1 | 0.625 |
| GO:0048385 | BP | GO:0048385 | regulation of retinoic acid receptor signaling                                       | 1/42 | 16/18903 | 0.03497725<br>5955821 | 0.11810860<br>3937605 | 0.07792088<br>78658693 | CYP26B1 | 1 | 0.625 |
| GO:0051447 | BP | GO:0051447 | negative regulation of meiotic cell cycle                                            | 1/42 | 16/18903 | 0.03497725<br>5955821 | 0.11810860<br>3937605 | 0.07792088<br>78658693 | DUSP1   | 1 | 0.625 |
| GO:0070875 | BP | GO:0070875 | positive regulation of glycolysis                                                    | 1/42 | 16/18903 | 0.03497725<br>5955821 | 0.11810860<br>3937605 | 0.07792088<br>78658693 | INSR    | 1 | 0.625 |
| GO:1902285 | BP | GO:1902285 | metabolic semaphorin-plexin signaling pathway involved in neuron projection guidance | 1/42 | 16/18903 | 0.03497725<br>5955821 | 0.11810860<br>3937605 | 0.07792088<br>78658693 | EDN1    | 1 | 0.625 |

|            |    |            |                                                                                                                                                                                                                                                                               |      |           |                        |                       |                        |                      |   |                        |
|------------|----|------------|-------------------------------------------------------------------------------------------------------------------------------------------------------------------------------------------------------------------------------------------------------------------------------|------|-----------|------------------------|-----------------------|------------------------|----------------------|---|------------------------|
| GO:0031647 | BP | GO:0031647 | regulation of protein stability phosphatidylinositol biosynthetic process cellular response to external epithelial to mesenchymal transition involved in endocardia regulation of exit from mitosis regulation of gastrulation positive regulation of myotube differentiation | 3/42 | 325/18903 | 0.03530089<br>49243138 | 0.11896679<br>5492963 | 0.07848707<br>0563176  | MSX1/NDC80<br>/MAPK1 | 3 | 0.09230769<br>23076923 |
| GO:0006661 | BP | GO:0006661 | response to external epithelial to mesenchymal transition involved in endocardia regulation of exit from mitosis regulation of gastrulation positive regulation of myotube differentiation                                                                                    | 2/42 | 134/18903 | 0.03570497<br>0623077  | 0.12009216<br>0523984 | 0.07922951<br>81027022 | UVRAG/ATM            | 2 | 0.14925373<br>1343284  |
| GO:0071496 | BP | GO:0071496 | regulation of protein stability phosphatidylinositol biosynthetic process cellular response to external epithelial to mesenchymal transition involved in endocardia regulation of exit from mitosis regulation of gastrulation positive regulation of myotube differentiation | 3/42 | 328/18903 | 0.03612615<br>31067577 | 0.12075451<br>8428109 | 0.07966650<br>16437291 | GADD45A/ATF4/MAPK1   | 3 | 0.09146341<br>46341463 |
| GO:0003198 | BP | GO:0003198 | regulation of protein stability phosphatidylinositol biosynthetic process cellular response to external epithelial to mesenchymal transition involved in endocardia regulation of exit from mitosis regulation of gastrulation positive regulation of myotube differentiation | 1/42 | 17/18903  | 0.03712322<br>70073301 | 0.12075451<br>8428109 | 0.07966650<br>16437291 | MSX1                 | 1 | 0.58823529<br>4117647  |
| GO:0007096 | BP | GO:0007096 | regulation of protein stability phosphatidylinositol biosynthetic process cellular response to external epithelial to mesenchymal transition involved in endocardia regulation of exit from mitosis regulation of gastrulation positive regulation of myotube differentiation | 1/42 | 17/18903  | 0.03712322<br>70073301 | 0.12075451<br>8428109 | 0.07966650<br>16437291 | RGCC                 | 1 | 0.58823529<br>4117647  |
| GO:0010470 | BP | GO:0010470 | regulation of protein stability phosphatidylinositol biosynthetic process cellular response to external epithelial to mesenchymal transition involved in endocardia regulation of exit from mitosis regulation of gastrulation positive regulation of myotube differentiation | 1/42 | 17/18903  | 0.03712322<br>70073301 | 0.12075451<br>8428109 | 0.07966650<br>16437291 | CLASP2               | 1 | 0.58823529<br>4117647  |
| GO:0010831 | BP | GO:0010831 | regulation of protein stability phosphatidylinositol biosynthetic process cellular response to external epithelial to mesenchymal transition involved in endocardia regulation of exit from mitosis regulation of gastrulation positive regulation of myotube differentiation | 1/42 | 17/18903  | 0.03712322<br>70073301 | 0.12075451<br>8428109 | 0.07966650<br>16437291 | CYP26B1              | 1 | 0.58823529<br>4117647  |
| GO:0033189 | BP | GO:0033189 | regulation of protein stability phosphatidylinositol biosynthetic process cellular response to external epithelial to mesenchymal transition involved in endocardia regulation of exit from mitosis regulation of gastrulation positive regulation of myotube differentiation | 1/42 | 17/18903  | 0.03712322<br>70073301 | 0.12075451<br>8428109 | 0.07966650<br>16437291 | CYP26B1              | 1 | 0.58823529<br>4117647  |

|            |    |            |                                                         |      |          |                        |                       |                        |        |   |                       |
|------------|----|------------|---------------------------------------------------------|------|----------|------------------------|-----------------------|------------------------|--------|---|-----------------------|
| GO:0051895 | BP | GO:0051895 | negative regulation of focal adhesion assembly cellular | 1/42 | 17/18903 | 0.03712322<br>70073301 | 0.12075451<br>8428109 | 0.07966650<br>16437291 | CLASP2 | 1 | 0.58823529<br>4117647 |
| GO:0071732 | BP | GO:0071732 | response to nitric oxide                                | 1/42 | 17/18903 | 0.03712322<br>70073301 | 0.12075451<br>8428109 | 0.07966650<br>16437291 | CDK2   | 1 | 0.58823529<br>4117647 |
| GO:0090399 | BP | GO:0090399 | replicative                                             | 1/42 | 17/18903 | 0.03712322<br>70073301 | 0.12075451<br>8428109 | 0.07966650<br>16437291 | ATM    | 1 | 0.58823529<br>4117647 |
| GO:0150118 | BP | GO:0150118 | negative regulation of cell-junction organization       | 1/42 | 17/18903 | 0.03712322<br>70073301 | 0.12075451<br>8428109 | 0.07966650<br>16437291 | CLASP2 | 1 | 0.58823529<br>4117647 |
| GO:1900034 | BP | GO:1900034 | regulation of cellular response                         | 1/42 | 17/18903 | 0.03712322<br>70073301 | 0.12075451<br>8428109 | 0.07966650<br>16437291 | ATM    | 1 | 0.58823529<br>4117647 |
| GO:1901096 | BP | GO:1901096 | regulation of autophagosome maturation                  | 1/42 | 17/18903 | 0.03712322<br>70073301 | 0.12075451<br>8428109 | 0.07966650<br>16437291 | UVRAG  | 1 | 0.58823529<br>4117647 |
| GO:1903358 | BP | GO:1903358 | regulation of Golgi organization                        | 1/42 | 17/18903 | 0.03712322<br>70073301 | 0.12075451<br>8428109 | 0.07966650<br>16437291 | MAPK1  | 1 | 0.58823529<br>4117647 |

|            |    |            |                                                                    |      |           |                        |                       |                        |                    |   |                        |
|------------|----|------------|--------------------------------------------------------------------|------|-----------|------------------------|-----------------------|------------------------|--------------------|---|------------------------|
| GO:1904355 | BP | GO:1904355 | positive regulation of telomere                                    | 1/42 | 17/18903  | 0.03712322<br>70073301 | 0.12075451<br>8428109 | 0.07966650<br>16437291 | MAPK1              | 1 | 0.58823529<br>4117647  |
| GO:1905269 | BP | GO:1905269 | positive regulation of chromatin organization                      | 1/42 | 17/18903  | 0.03712322<br>70073301 | 0.12075451<br>8428109 | 0.07966650<br>16437291 | CDK2               | 1 | 0.58823529<br>4117647  |
| GO:1905288 | BP | GO:1905288 | vascular associated smooth muscle cell apoptotic regulation of     | 1/42 | 17/18903  | 0.03712322<br>70073301 | 0.12075451<br>8428109 | 0.07966650<br>16437291 | ATF4               | 1 | 0.58823529<br>4117647  |
| GO:1905459 | BP | GO:1905459 | vascular associated smooth muscle cell regulation of wound healing | 1/42 | 17/18903  | 0.03712322<br>70073301 | 0.12075451<br>8428109 | 0.07966650<br>16437291 | ATF4               | 1 | 0.58823529<br>4117647  |
| GO:0061041 | BP | GO:0061041 | regulation of wound healing                                        | 2/42 | 137/18903 | 0.03717295<br>17472498 | 0.12075451<br>8428109 | 0.07966650<br>16437291 | CLASP2/EDN1        | 2 | 0.14598540<br>1459854  |
| GO:0048638 | BP | GO:0048638 | regulation of developmental growth mammary gland                   | 3/42 | 332/18903 | 0.03724204<br>77395103 | 0.12075451<br>8428109 | 0.07966650<br>16437291 | INSR/PFAFH1B1/EDN1 | 3 | 0.09036144<br>57831325 |
| GO:0030879 | BP | GO:0030879 | mammary gland development                                          | 2/42 | 138/18903 | 0.03766741<br>79496292 | 0.12190287<br>2457023 | 0.08042411<br>5928668  | MSX1/MAPK1         | 2 | 0.14492753<br>6231884  |

|            |    |            |                                                            |      |           |                        |                       |                        |                      |   |                        |
|------------|----|------------|------------------------------------------------------------|------|-----------|------------------------|-----------------------|------------------------|----------------------|---|------------------------|
| GO:0071214 | BP | GO:0071214 | cellular<br>response<br>to abiotic<br>stimulus<br>cellular | 3/42 | 335/18903 | 0.03809060<br>4423627  | 0.12266586<br>0086676 | 0.08092748<br>88545272 | GADD45A/AT<br>F4/ATM | 3 | 0.08955223<br>88059702 |
| GO:0104004 | BP | GO:0104004 | response<br>to<br>environmen<br>nucleus                    | 3/42 | 335/18903 | 0.03809060<br>4423627  | 0.12266586<br>0086676 | 0.08092748<br>88545272 | GADD45A/AT<br>F4/ATM | 3 | 0.08955223<br>88059702 |
| GO:0006997 | BP | GO:0006997 | organizati<br>on                                           | 2/42 | 139/18903 | 0.03816443<br>1682782  | 0.12266586<br>0086676 | 0.08092748<br>88545272 | SUN2/PFAFAH<br>1B1   | 2 | 0.14388489<br>2086331  |
| GO:0048813 | BP | GO:0048813 | dendrite<br>morphogene<br>sis                              | 2/42 | 140/18903 | 0.03866397<br>97822874 | 0.12266586<br>0086676 | 0.08092748<br>88545272 | CUL7/PFAFAH<br>1B1   | 2 | 0.14285714<br>2857143  |
| GO:0046328 | BP | GO:0046328 | regulation<br>of JNK<br>cascade<br>gastric                 | 2/42 | 141/18903 | 0.03916604<br>91271619 | 0.12266586<br>0086676 | 0.08092748<br>88545272 | GADD45A/PA<br>FAH1B1 | 2 | 0.14184397<br>1631206  |
| GO:0001696 | BP | GO:0001696 | acid<br>secretion<br>asymmetric                            | 1/42 | 18/18903  | 0.03926453<br>93268097 | 0.12266586<br>0086676 | 0.08092748<br>88545272 | SNX10                | 1 | 0.55555555<br>5555556  |
| GO:0008356 | BP | GO:0008356 | cell<br>division<br>prostaglan                             | 1/42 | 18/18903  | 0.03926453<br>93268097 | 0.12266586<br>0086676 | 0.08092748<br>88545272 | ASPM                 | 1 | 0.55555555<br>5555556  |
| GO:0032310 | BP | GO:0032310 | din<br>secretion<br>response                               | 1/42 | 18/18903  | 0.03926453<br>93268097 | 0.12266586<br>0086676 | 0.08092748<br>88545272 | EDN1                 | 1 | 0.55555555<br>5555556  |
| GO:0032354 | BP | GO:0032354 | to<br>follicle-<br>stimulatin                              | 1/42 | 18/18903  | 0.03926453<br>93268097 | 0.12266586<br>0086676 | 0.08092748<br>88545272 | EDN1                 | 1 | 0.55555555<br>5555556  |
| GO:0033151 | BP | GO:0033151 | V(D)J<br>recombinat<br>ion                                 | 1/42 | 18/18903  | 0.03926453<br>93268097 | 0.12266586<br>0086676 | 0.08092748<br>88545272 | ATM                  | 1 | 0.55555555<br>5555556  |

|            |    |            |                                                                     |      |          |                        |                       |                        |          |   |                       |
|------------|----|------------|---------------------------------------------------------------------|------|----------|------------------------|-----------------------|------------------------|----------|---|-----------------------|
| GO:0035970 | BP | GO:0035970 | peptidyl-<br>threonine<br>dephosphor<br>ylation                     | 1/42 | 18/18903 | 0.03926453<br>93268097 | 0.12266586<br>0086676 | 0.08092748<br>88545272 | DUSP1    | 1 | 0.55555555<br>5555556 |
| GO:0036035 | BP | GO:0036035 | osteoclast<br>developmen<br>PERK-<br>mediated                       | 1/42 | 18/18903 | 0.03926453<br>93268097 | 0.12266586<br>0086676 | 0.08092748<br>88545272 | PAFAH1B1 | 1 | 0.55555555<br>5555556 |
| GO:0036499 | BP | GO:0036499 | unfolded<br>protein<br>response                                     | 1/42 | 18/18903 | 0.03926453<br>93268097 | 0.12266586<br>0086676 | 0.08092748<br>88545272 | ATF4     | 1 | 0.55555555<br>5555556 |
| GO:0043217 | BP | GO:0043217 | myelin<br>maintenanc<br>negative                                    | 1/42 | 18/18903 | 0.03926453<br>93268097 | 0.12266586<br>0086676 | 0.08092748<br>88545272 | NDRG1    | 1 | 0.55555555<br>5555556 |
| GO:0051782 | BP | GO:0051782 | regulation<br>of cell<br>division<br>regulation                     | 1/42 | 18/18903 | 0.03926453<br>93268097 | 0.12266586<br>0086676 | 0.08092748<br>88545272 | ASPM     | 1 | 0.55555555<br>5555556 |
| GO:0060263 | BP | GO:0060263 | of<br>respirator<br>y burst                                         | 1/42 | 18/18903 | 0.03926453<br>93268097 | 0.12266586<br>0086676 | 0.08092748<br>88545272 | INSR     | 1 | 0.55555555<br>5555556 |
| GO:0061952 | BP | GO:0061952 | midbody<br>abscission<br>G protein-<br>coupled                      | 1/42 | 18/18903 | 0.03926453<br>93268097 | 0.12266586<br>0086676 | 0.08092748<br>88545272 | CEP55    | 1 | 0.55555555<br>5555556 |
| GO:0086103 | BP | GO:0086103 | receptor<br>signaling<br>pathway<br>involved<br>in heart<br>process | 1/42 | 18/18903 | 0.03926453<br>93268097 | 0.12266586<br>0086676 | 0.08092748<br>88545272 | EDN1     | 1 | 0.55555555<br>5555556 |

|            |    |            |                                                                                |      |           |                        |                       |                        |                    |   |                        |
|------------|----|------------|--------------------------------------------------------------------------------|------|-----------|------------------------|-----------------------|------------------------|--------------------|---|------------------------|
| GO:2000641 | BP | GO:2000641 | regulation<br>of early<br>endosome<br>to late<br>endosome<br>transport<br>G2/M | 1/42 | 18/18903  | 0.03926453<br>93268097 | 0.12266586<br>0086676 | 0.08092748<br>88545272 | MAPK1              | 1 | 0.5555555<br>5555556   |
| GO:0000086 | BP | GO:0000086 | transition<br>of mitotic<br>cell cycle<br>appendage                            | 2/42 | 142/18903 | 0.03967062<br>66397399 | 0.12325973<br>2862495 | 0.08131929<br>00648408 | ATM/CDK2           | 2 | 0.14084507<br>0422535  |
| GO:0035107 | BP | GO:0035107 | morphogene<br>sis<br>limb                                                      | 2/42 | 142/18903 | 0.03967062<br>66397399 | 0.12325973<br>2862495 | 0.08131929<br>00648408 | MSX1/CYP26<br>B1   | 2 | 0.14084507<br>0422535  |
| GO:0035108 | BP | GO:0035108 | morphogene<br>sis                                                              | 2/42 | 142/18903 | 0.03967062<br>66397399 | 0.12325973<br>2862495 | 0.08131929<br>00648408 | MSX1/CYP26<br>B1   | 2 | 0.14084507<br>0422535  |
| GO:0010212 | BP | GO:0010212 | response<br>to<br>ionizing<br>positive                                         | 2/42 | 143/18903 | 0.04017769<br>9285553  | 0.12460909<br>6334904 | 0.08220951<br>81796308 | GADD45A/AT<br>M    | 2 | 0.13986013<br>986014   |
| GO:0010508 | BP | GO:0010508 | regulation<br>of<br>autophagy<br>positive                                      | 2/42 | 144/18903 | 0.04068725<br>40732102 | 0.12522766<br>6364863 | 0.08261761<br>31391401 | PLK2/UVRAG         | 2 | 0.13888888<br>8888889  |
| GO:0050921 | BP | GO:0050921 | regulation<br>of<br>chemotaxis                                                 | 2/42 | 144/18903 | 0.04068725<br>40732102 | 0.12522766<br>6364863 | 0.08261761<br>31391401 | MAPK1/EDN1         | 2 | 0.13888888<br>8888889  |
| GO:0010506 | BP | GO:0010506 | regulation<br>of<br>autophagy<br>mitotic                                       | 3/42 | 344/18903 | 0.04069587<br>49381674 | 0.12522766<br>6364863 | 0.08261761<br>31391401 | PLK2/UVRAG<br>/ATM | 3 | 0.08720930<br>23255814 |
| GO:0007076 | BP | GO:0007076 | chromosome<br>condensati<br>on                                                 | 1/42 | 19/18903  | 0.04140120<br>27818412 | 0.12522766<br>6364863 | 0.08261761<br>31391401 | SMC4               | 1 | 0.52631578<br>9473684  |

|            |    |            |                                                                                                                                                                                                  |      |          |                        |                       |                        |       |   |                       |
|------------|----|------------|--------------------------------------------------------------------------------------------------------------------------------------------------------------------------------------------------|------|----------|------------------------|-----------------------|------------------------|-------|---|-----------------------|
| GO:0010759 | BP | GO:0010759 | positive regulation of macrophage chemotaxis negative regulation of B cell proliferation                                                                                                         | 1/42 | 19/18903 | 0.04140120<br>27818412 | 0.12522766<br>6364863 | 0.08261761<br>31391401 | MAPK1 | 1 | 0.52631578<br>9473684 |
| GO:0030889 | BP | GO:0030889 | regulation of renal sodium excretion positive regulation of transcription from RNA polymerase II promoter regulation of single stranded viral RNA replication via double stranded DNA intermedia | 1/42 | 19/18903 | 0.04140120<br>27818412 | 0.12522766<br>6364863 | 0.08261761<br>31391401 | ATM   | 1 | 0.52631578<br>9473684 |
| GO:0035813 | BP | GO:0035813 | positive regulation of transcription from RNA polymerase II promoter regulation of single stranded viral RNA replication via double stranded DNA intermedia                                      | 1/42 | 19/18903 | 0.04140120<br>27818412 | 0.12522766<br>6364863 | 0.08261761<br>31391401 | EDN1  | 1 | 0.52631578<br>9473684 |
| GO:0036003 | BP | GO:0036003 | positive regulation of transcription from RNA polymerase II promoter regulation of single stranded viral RNA replication via double stranded DNA intermedia                                      | 1/42 | 19/18903 | 0.04140120<br>27818412 | 0.12522766<br>6364863 | 0.08261761<br>31391401 | ATF4  | 1 | 0.52631578<br>9473684 |
| GO:0045091 | BP | GO:0045091 | positive regulation of transcription from RNA polymerase II promoter regulation of single stranded viral RNA replication via double stranded DNA intermedia                                      | 1/42 | 19/18903 | 0.04140120<br>27818412 | 0.12522766<br>6364863 | 0.08261761<br>31391401 | TOP2A | 1 | 0.52631578<br>9473684 |

|            |    |            |                                                      |      |           |                        |                       |                        |                   |   |                        |
|------------|----|------------|------------------------------------------------------|------|-----------|------------------------|-----------------------|------------------------|-------------------|---|------------------------|
| GO:0045947 | BP | GO:0045947 | negative regulation of translational initiation      | 1/42 | 19/18903  | 0.04140120<br>27818412 | 0.12522766<br>6364863 | 0.08261761<br>31391401 | ATF4              | 1 | 0.52631578<br>9473684  |
| GO:0060438 | BP | GO:0060438 | trachea development                                  | 1/42 | 19/18903  | 0.04140120<br>27818412 | 0.12522766<br>6364863 | 0.08261761<br>31391401 | MAPK1             | 1 | 0.52631578<br>9473684  |
| GO:0061003 | BP | GO:0061003 | positive regulation of dendritic spine morphogenesis | 1/42 | 19/18903  | 0.04140120<br>27818412 | 0.12522766<br>6364863 | 0.08261761<br>31391401 | PAFAH1B1          | 1 | 0.52631578<br>9473684  |
| GO:1901978 | BP | GO:1901978 | positive regulation of cell cycle checkpoint         | 1/42 | 19/18903  | 0.04140120<br>27818412 | 0.12522766<br>6364863 | 0.08261761<br>31391401 | NDC80             | 1 | 0.52631578<br>9473684  |
| GO:1902170 | BP | GO:1902170 | cellular response to reactive nitrogen regulation    | 1/42 | 19/18903  | 0.04140120<br>27818412 | 0.12522766<br>6364863 | 0.08261761<br>31391401 | CDK2              | 1 | 0.52631578<br>9473684  |
| GO:0045765 | BP | GO:0045765 | angiogenesis                                         | 3/42 | 349/18903 | 0.04218169<br>89557029 | 0.12653460<br>9507645 | 0.08347985<br>4895292  | GADD45A/PLK2/RGCC | 3 | 0.08595988<br>53868195 |
| GO:0008584 | BP | GO:0008584 | male gonad development                               | 2/42 | 147/18903 | 0.04223068<br>2016987  | 0.12653460<br>9507645 | 0.08347985<br>4895292  | INSR/ASPM         | 2 | 0.13605442<br>1768707  |
| GO:0035264 | BP | GO:0035264 | multicellular organism                               | 2/42 | 147/18903 | 0.04223068<br>2016987  | 0.12653460<br>9507645 | 0.08347985<br>4895292  | RMI1/ATM          | 2 | 0.13605442<br>1768707  |

|            |    |            |                                                                                                                                                           |      |           |                        |                       |                       |                      |   |                        |
|------------|----|------------|-----------------------------------------------------------------------------------------------------------------------------------------------------------|------|-----------|------------------------|-----------------------|-----------------------|----------------------|---|------------------------|
| GO:0002687 | BP | GO:0002687 | positive regulation of leukocyte migration activation                                                                                                     | 2/42 | 148/18903 | 0.04275003<br>63154771 | 0.12653460<br>9507645 | 0.08347985<br>4895292 | MAPK1/EDN1           | 2 | 0.13513513<br>5135135  |
| GO:0032147 | BP | GO:0032147 | of protein kinase activity development of primary male sexual positive regulation of cell projection organization neural precursor cell proliferation Ras | 2/42 | 148/18903 | 0.04275003<br>63154771 | 0.12653460<br>9507645 | 0.08347985<br>4895292 | INSR/RGCC            | 2 | 0.13513513<br>5135135  |
| GO:0046546 | BP | GO:0046546 | of protein kinase activity development of primary male sexual positive regulation of cell projection organization neural precursor cell proliferation Ras | 2/42 | 148/18903 | 0.04275003<br>63154771 | 0.12653460<br>9507645 | 0.08347985<br>4895292 | INSR/ASPM            | 2 | 0.13513513<br>5135135  |
| GO:0031346 | BP | GO:0031346 | of cell projection organization neural precursor cell proliferation Ras                                                                                   | 3/42 | 352/18903 | 0.04308631<br>14761885 | 0.12653460<br>9507645 | 0.08347985<br>4895292 | CUL7/MARK4/PFAFH1B1  | 3 | 0.08522727<br>27272727 |
| GO:0061351 | BP | GO:0061351 | of cell projection organization neural precursor cell proliferation Ras                                                                                   | 2/42 | 149/18903 | 0.04327180<br>844084   | 0.12653460<br>9507645 | 0.08347985<br>4895292 | PFAFH1B1/ASPM        | 2 | 0.13422818<br>7919463  |
| GO:0007265 | BP | GO:0007265 | protein signal transduction vesicle organization                                                                                                          | 3/42 | 353/18903 | 0.04339002<br>92595919 | 0.12653460<br>9507645 | 0.08347985<br>4895292 | PLK2/SSX2IP/CDK2     | 3 | 0.08498583<br>5694051  |
| GO:0016050 | BP | GO:0016050 | protein signal transduction vesicle organization                                                                                                          | 3/42 | 353/18903 | 0.04339002<br>92595919 | 0.12653460<br>9507645 | 0.08347985<br>4895292 | UVRAG/SNX10/PFAFH1B1 | 3 | 0.08498583<br>5694051  |

|            |    |            |                                                                                 |      |          |                        |                       |                       |          |   |     |
|------------|----|------------|---------------------------------------------------------------------------------|------|----------|------------------------|-----------------------|-----------------------|----------|---|-----|
| GO:0006662 | BP | GO:0006662 | glycerol<br>ether<br>metabolic<br>process                                       | 1/42 | 20/18903 | 0.04353322<br>72196278 | 0.12653460<br>9507645 | 0.08347985<br>4895292 | PAFAH1B1 | 1 | 0.5 |
| GO:0008334 | BP | GO:0008334 | histone<br>mRNA<br>metabolic<br>process                                         | 1/42 | 20/18903 | 0.04353322<br>72196278 | 0.12653460<br>9507645 | 0.08347985<br>4895292 | ATM      | 1 | 0.5 |
| GO:0008340 | BP | GO:0008340 | determinat<br>ion of<br>adult                                                   | 1/42 | 20/18903 | 0.04353322<br>72196278 | 0.12653460<br>9507645 | 0.08347985<br>4895292 | ATM      | 1 | 0.5 |
| GO:0015732 | BP | GO:0015732 | prostaglan<br>din<br>transport<br>single<br>stranded<br>viral RNA<br>replicatio | 1/42 | 20/18903 | 0.04353322<br>72196278 | 0.12653460<br>9507645 | 0.08347985<br>4895292 | EDN1     | 1 | 0.5 |
| GO:0039692 | BP | GO:0039692 | n via<br>double<br>stranded<br>DNA<br>intermedia                                | 1/42 | 20/18903 | 0.04353322<br>72196278 | 0.12653460<br>9507645 | 0.08347985<br>4895292 | TOP2A    | 1 | 0.5 |
| GO:0043586 | BP | GO:0043586 | tongue<br>developmen                                                            | 1/42 | 20/18903 | 0.04353322<br>72196278 | 0.12653460<br>9507645 | 0.08347985<br>4895292 | CYP26B1  | 1 | 0.5 |
| GO:0046485 | BP | GO:0046485 | ether<br>lipid<br>metabolic<br>labyrinthi<br>ne layer                           | 1/42 | 20/18903 | 0.04353322<br>72196278 | 0.12653460<br>9507645 | 0.08347985<br>4895292 | PAFAH1B1 | 1 | 0.5 |
| GO:0060716 | BP | GO:0060716 | blood<br>vessel<br>developmen                                                   | 1/42 | 20/18903 | 0.04353322<br>72196278 | 0.12653460<br>9507645 | 0.08347985<br>4895292 | MAPK1    | 1 | 0.5 |

|            |    |            |                                                                                                                                                                                                                        |      |           |                        |                       |                        |            |   |                       |
|------------|----|------------|------------------------------------------------------------------------------------------------------------------------------------------------------------------------------------------------------------------------|------|-----------|------------------------|-----------------------|------------------------|------------|---|-----------------------|
| GO:0071243 | BP | GO:0071243 | cellular response to arsenic-containing cellular response to gonadotrop regulation of microglial cell activation negative regulation of transcription regulatory region DNA binding regulation of skeletal muscle cell | 1/42 | 20/18903  | 0.04353322<br>72196278 | 0.12653460<br>9507645 | 0.08347985<br>4895292  | ATF4       | 1 | 0.5                   |
| GO:0071371 | BP | GO:0071371 | cellular response to gonadotrop regulation of microglial cell activation negative regulation of transcription regulatory region DNA binding regulation of skeletal muscle cell                                         | 1/42 | 20/18903  | 0.04353322<br>72196278 | 0.12653460<br>9507645 | 0.08347985<br>4895292  | EDN1       | 1 | 0.5                   |
| GO:1903978 | BP | GO:1903978 | cellular response to gonadotrop regulation of microglial cell activation negative regulation of transcription regulatory region DNA binding regulation of skeletal muscle cell                                         | 1/42 | 20/18903  | 0.04353322<br>72196278 | 0.12653460<br>9507645 | 0.08347985<br>4895292  | ATM        | 1 | 0.5                   |
| GO:2000678 | BP | GO:2000678 | cellular response to gonadotrop regulation of microglial cell activation negative regulation of transcription regulatory region DNA binding regulation of skeletal muscle cell                                         | 1/42 | 20/18903  | 0.04353322<br>72196278 | 0.12653460<br>9507645 | 0.08347985<br>4895292  | MSX1       | 1 | 0.5                   |
| GO:2001014 | BP | GO:2001014 | cellular response to gonadotrop regulation of microglial cell activation negative regulation of transcription regulatory region DNA binding regulation of skeletal muscle cell                                         | 1/42 | 20/18903  | 0.04353322<br>72196278 | 0.12653460<br>9507645 | 0.08347985<br>4895292  | CYP26B1    | 1 | 0.5                   |
| GO:0001890 | BP | GO:0001890 | placenta development cellular response to reactive oxygen                                                                                                                                                              | 2/42 | 150/18903 | 0.04379598<br>56576473 | 0.12686755<br>9130105 | 0.08369951<br>48466569 | CUL7/MAPK1 | 2 | 0.13333333<br>3333333 |
| GO:0034614 | BP | GO:0034614 | placenta development cellular response to reactive oxygen                                                                                                                                                              | 2/42 | 150/18903 | 0.04379598<br>56576473 | 0.12686755<br>9130105 | 0.08369951<br>48466569 | MAPK1/EDN1 | 2 | 0.13333333<br>3333333 |

|            |    |            |                                                                                                                                                                                                      |      |           |                        |                       |                        |                   |   |                        |
|------------|----|------------|------------------------------------------------------------------------------------------------------------------------------------------------------------------------------------------------------|------|-----------|------------------------|-----------------------|------------------------|-------------------|---|------------------------|
| GO:1901342 | BP | GO:1901342 | regulation of vasculature                                                                                                                                                                            | 3/42 | 355/18903 | 0.04400072<br>89776906 | 0.12724535<br>1367916 | 0.08394875<br>92337519 | GADD45A/PLK2/RGCC | 3 | 0.08450704<br>22535211 |
| GO:0072507 | BP | GO:0072507 | divalent inorganic cation homeostasis                                                                                                                                                                | 3/42 | 356/18903 | 0.04430770<br>87851622 | 0.12774446<br>9068839 | 0.08427804<br>67971373 | ATF4/SNX10/EDN1   | 3 | 0.08426966<br>29213483 |
| GO:0046718 | BP | GO:0046718 | viral entry into host cell lens morphogenesis in camera-type eye retrograde axonal transport positive regulation of icosanoid secretion renal sodium excretion peptidyl-tyrosine autophosphorylation | 2/42 | 151/18903 | 0.04432255<br>52727163 | 0.12774446<br>9068839 | 0.08427804<br>67971373 | INSR/UVRAG        | 2 | 0.13245033<br>1125828  |
| GO:0002089 | BP | GO:0002089 | retrograde axonal transport positive regulation of icosanoid secretion renal sodium excretion peptidyl-tyrosine autophosphorylation                                                                  | 1/42 | 21/18903  | 0.04566062<br>24670341 | 0.12835958<br>2370381 | 0.08468386<br>12170557 | ATF4              | 1 | 0.47619047<br>6190476  |
| GO:0008090 | BP | GO:0008090 | retrograde axonal transport positive regulation of icosanoid secretion renal sodium excretion peptidyl-tyrosine autophosphorylation                                                                  | 1/42 | 21/18903  | 0.04566062<br>24670341 | 0.12835958<br>2370381 | 0.08468386<br>12170557 | PAFAH1B1          | 1 | 0.47619047<br>6190476  |
| GO:0032305 | BP | GO:0032305 | retrograde axonal transport positive regulation of icosanoid secretion renal sodium excretion peptidyl-tyrosine autophosphorylation                                                                  | 1/42 | 21/18903  | 0.04566062<br>24670341 | 0.12835958<br>2370381 | 0.08468386<br>12170557 | EDN1              | 1 | 0.47619047<br>6190476  |
| GO:0035812 | BP | GO:0035812 | retrograde axonal transport positive regulation of icosanoid secretion renal sodium excretion peptidyl-tyrosine autophosphorylation                                                                  | 1/42 | 21/18903  | 0.04566062<br>24670341 | 0.12835958<br>2370381 | 0.08468386<br>12170557 | EDN1              | 1 | 0.47619047<br>6190476  |
| GO:0038083 | BP | GO:0038083 | retrograde axonal transport positive regulation of icosanoid secretion renal sodium excretion peptidyl-tyrosine autophosphorylation                                                                  | 1/42 | 21/18903  | 0.04566062<br>24670341 | 0.12835958<br>2370381 | 0.08468386<br>12170557 | INSR              | 1 | 0.47619047<br>6190476  |

|            |    |            |                                                                                                                    |      |          |                        |                       |                        |       |   |                       |
|------------|----|------------|--------------------------------------------------------------------------------------------------------------------|------|----------|------------------------|-----------------------|------------------------|-------|---|-----------------------|
| GO:0045821 | BP | GO:0045821 | positive regulation of glycolytic process attachment of mitotic spindle microtubules to kinetochor cell migration  | 1/42 | 21/18903 | 0.04566062<br>24670341 | 0.12835958<br>2370381 | 0.08468386<br>12170557 | INSR  | 1 | 0.47619047<br>6190476 |
| GO:0051315 | BP | GO:0051315 | involved in heart development regulation of cell growth                                                            | 1/42 | 21/18903 | 0.04566062<br>24670341 | 0.12835958<br>2370381 | 0.08468386<br>12170557 | NDC80 | 1 | 0.47619047<br>6190476 |
| GO:0060973 | BP | GO:0060973 | involved in cardiac muscle cell response to nitric oxide dendritic spine maintenanc actin filament-based transport | 1/42 | 21/18903 | 0.04566062<br>24670341 | 0.12835958<br>2370381 | 0.08468386<br>12170557 | EDN1  | 1 | 0.47619047<br>6190476 |
| GO:0061050 | BP | GO:0061050 | involved in cardiac muscle cell response to nitric oxide dendritic spine maintenanc actin filament-based transport | 1/42 | 21/18903 | 0.04566062<br>24670341 | 0.12835958<br>2370381 | 0.08468386<br>12170557 | EDN1  | 1 | 0.47619047<br>6190476 |
| GO:0071731 | BP | GO:0071731 | involved in cardiac muscle cell response to nitric oxide dendritic spine maintenanc actin filament-based transport | 1/42 | 21/18903 | 0.04566062<br>24670341 | 0.12835958<br>2370381 | 0.08468386<br>12170557 | CDK2  | 1 | 0.47619047<br>6190476 |
| GO:0097062 | BP | GO:0097062 | involved in cardiac muscle cell response to nitric oxide dendritic spine maintenanc actin filament-based transport | 1/42 | 21/18903 | 0.04566062<br>24670341 | 0.12835958<br>2370381 | 0.08468386<br>12170557 | INSR  | 1 | 0.47619047<br>6190476 |
| GO:0099515 | BP | GO:0099515 | involved in cardiac muscle cell response to nitric oxide dendritic spine maintenanc actin filament-based transport | 1/42 | 21/18903 | 0.04566062<br>24670341 | 0.12835958<br>2370381 | 0.08468386<br>12170557 | SUN2  | 1 | 0.47619047<br>6190476 |

|            |    |            |                                                                                                                  |      |           |                        |                       |                        |                          |   |                        |
|------------|----|------------|------------------------------------------------------------------------------------------------------------------|------|-----------|------------------------|-----------------------|------------------------|--------------------------|---|------------------------|
| GO:1901522 | BP | GO:1901522 | positive regulation of transcription from RNA polymerase II promoter involved in cellular negative regulation of | 1/42 | 21/18903  | 0.04566062<br>24670341 | 0.12835958<br>2370381 | 0.08468386<br>12170557 | ATF4                     | 1 | 0.47619047<br>6190476  |
| GO:1903204 | BP | GO:1903204 | oxidative stress-induced neuron death regulation of cell-                                                        | 1/42 | 21/18903  | 0.04566062<br>24670341 | 0.12835958<br>2370381 | 0.08468386<br>12170557 | ATF4                     | 1 | 0.47619047<br>6190476  |
| GO:2000047 | BP | GO:2000047 | cell adhesion mediated by                                                                                        | 1/42 | 21/18903  | 0.04566062<br>24670341 | 0.12835958<br>2370381 | 0.08468386<br>12170557 | RGCC                     | 1 | 0.47619047<br>6190476  |
| GO:0008544 | BP | GO:0008544 | epidermis developmen                                                                                             | 3/42 | 362/18903 | 0.04617233<br>81584051 | 0.12958531<br>6274081 | 0.08549252<br>60465377 | INSR/PFAFH<br>1B1/CYP26B | 3 | 0.08287292<br>81767956 |

|            |    |            |                                                                                                      |      |           |                        |                       |                        |                      |   |                        |
|------------|----|------------|------------------------------------------------------------------------------------------------------|------|-----------|------------------------|-----------------------|------------------------|----------------------|---|------------------------|
| GO:0070507 | BP | GO:0070507 | regulation<br>of<br>microtubul<br>e<br>cytoskelet<br>on<br>organizati<br>on                          | 2/42 | 155/18903 | 0.04645250<br>53240046 | 0.13015824<br>7323561 | 0.08587051<br>11769437 | CLASP2/PAF<br>AH1B1  | 2 | 0.12903225<br>8064516  |
| GO:0008643 | BP | GO:0008643 | carbohydra<br>te<br>regulation<br>of actin<br>cytoskelet<br>on                                       | 2/42 | 156/18903 | 0.04699084<br>80030516 | 0.13067919<br>7990473 | 0.08621420<br>28060607 | INSR/EDN1            | 2 | 0.12820512<br>8205128  |
| GO:0032956 | BP | GO:0032956 | organizati<br>on<br>DNA<br>unwinding<br>involved<br>in DNA<br>replicatio<br>sex<br>determinat<br>ion | 3/42 | 365/18903 | 0.04711922<br>76099399 | 0.13067919<br>7990473 | 0.08621420<br>28060607 | CLASP2/RGC<br>C/EDN1 | 3 | 0.08219178<br>08219178 |
| GO:0006268 | BP | GO:0006268 | response<br>to<br>manganese<br>signal<br>transducti<br>on                                            | 1/42 | 22/18903  | 0.04778339<br>83306284 | 0.13067919<br>7990473 | 0.08621420<br>28060607 | RPA1                 | 1 | 0.45454545<br>4545455  |
| GO:0007530 | BP | GO:0007530 | involved<br>in<br>regulation<br>of gene                                                              | 1/42 | 22/18903  | 0.04778339<br>83306284 | 0.13067919<br>7990473 | 0.08621420<br>28060607 | INSR                 | 1 | 0.45454545<br>4545455  |
| GO:0010042 | BP | GO:0010042 | involved<br>in<br>regulation<br>of gene                                                              | 1/42 | 22/18903  | 0.04778339<br>83306284 | 0.13067919<br>7990473 | 0.08621420<br>28060607 | ATF4                 | 1 | 0.45454545<br>4545455  |
| GO:0023019 | BP | GO:0023019 | involved<br>in<br>regulation<br>of gene                                                              | 1/42 | 22/18903  | 0.04778339<br>83306284 | 0.13067919<br>7990473 | 0.08621420<br>28060607 | MSX1                 | 1 | 0.45454545<br>4545455  |

|            |    |            |                                                            |      |          |                        |                       |                        |        |   |                       |
|------------|----|------------|------------------------------------------------------------|------|----------|------------------------|-----------------------|------------------------|--------|---|-----------------------|
| GO:0032303 | BP | GO:0032303 | regulation of<br>icosanoid<br>secretion                    | 1/42 | 22/18903 | 0.04778339<br>83306284 | 0.13067919<br>7990473 | 0.08621420<br>28060607 | EDN1   | 1 | 0.45454545<br>4545455 |
| GO:0035020 | BP | GO:0035020 | regulation of Rac<br>protein<br>signal<br>transducti<br>on | 1/42 | 22/18903 | 0.04778339<br>83306284 | 0.13067919<br>7990473 | 0.08621420<br>28060607 | SSX2IP | 1 | 0.45454545<br>4545455 |
| GO:0035313 | BP | GO:0035313 | wound<br>healing,<br>spreading<br>of<br>epidermal<br>cells | 1/42 | 22/18903 | 0.04778339<br>83306284 | 0.13067919<br>7990473 | 0.08621420<br>28060607 | CLASP2 | 1 | 0.45454545<br>4545455 |
| GO:0035809 | BP | GO:0035809 | regulation<br>of urine<br>volume                           | 1/42 | 22/18903 | 0.04778339<br>83306284 | 0.13067919<br>7990473 | 0.08621420<br>28060607 | EDN1   | 1 | 0.45454545<br>4545455 |
| GO:0044062 | BP | GO:0044062 | regulation<br>of<br>excretion                              | 1/42 | 22/18903 | 0.04778339<br>83306284 | 0.13067919<br>7990473 | 0.08621420<br>28060607 | EDN1   | 1 | 0.45454545<br>4545455 |
| GO:0044321 | BP | GO:0044321 | response<br>to leptin<br>nitric-<br>oxide                  | 1/42 | 22/18903 | 0.04778339<br>83306284 | 0.13067919<br>7990473 | 0.08621420<br>28060607 | EDN1   | 1 | 0.45454545<br>4545455 |
| GO:0051767 | BP | GO:0051767 | synthase<br>biosynthet<br>ic process                       | 1/42 | 22/18903 | 0.04778339<br>83306284 | 0.13067919<br>7990473 | 0.08621420<br>28060607 | EDN1   | 1 | 0.45454545<br>4545455 |

|            |    |            |                                                                   |      |           |                        |                       |                        |                 |   |                       |
|------------|----|------------|-------------------------------------------------------------------|------|-----------|------------------------|-----------------------|------------------------|-----------------|---|-----------------------|
| GO:0051769 | BP | GO:0051769 | regulation of nitric-oxide synthase biosynthetic process auditory | 1/42 | 22/18903  | 0.04778339<br>83306284 | 0.13067919<br>7990473 | 0.08621420<br>28060607 | EDN1            | 1 | 0.45454545<br>4545455 |
| GO:0060117 | BP | GO:0060117 | receptor cell developmen                                          | 1/42 | 22/18903  | 0.04778339<br>83306284 | 0.13067919<br>7990473 | 0.08621420<br>28060607 | PAFAH1B1        | 1 | 0.45454545<br>4545455 |
| GO:0044409 | BP | GO:0044409 | entry into host                                                   | 2/42 | 158/18903 | 0.04807447<br>23197382 | 0.13105652<br>3266547 | 0.08646313<br>91201459 | INSR/UVRAG      | 2 | 0.12658227<br>8481013 |
| GO:0097530 | BP | GO:0097530 | granulocyte                                                       | 2/42 | 158/18903 | 0.04807447<br>23197382 | 0.13105652<br>3266547 | 0.08646313<br>91201459 | MAPK1/EDN1      | 2 | 0.12658227<br>8481013 |
| GO:0035051 | BP | GO:0035051 | cardiocyte differentiation actin                                  | 2/42 | 159/18903 | 0.04861972<br>91972241 | 0.13233223<br>590723  | 0.08730477<br>68866564 | MAPK1/EDN1      | 2 | 0.12578616<br>3522013 |
| GO:0051017 | BP | GO:0051017 | filament bundle assembly                                          | 2/42 | 160/18903 | 0.04916726<br>61161109 | 0.13361009<br>4588543 | 0.08814783<br>0480513  | CLASP2/RGC<br>C | 2 | 0.125                 |
| GO:0001675 | BP | GO:0001675 | acrosome assembly negative regulation                             | 1/42 | 23/18903  | 0.04990156<br>45967221 | 0.13369558<br>4647243 | 0.08820423<br>16321272 | PAFAH1B1        | 1 | 0.43478260<br>8695652 |
| GO:0002689 | BP | GO:0002689 | of leukocyte chemotaxis phasic                                    | 1/42 | 23/18903  | 0.04990156<br>45967221 | 0.13369558<br>4647243 | 0.08820423<br>16321272 | DUSP1           | 1 | 0.43478260<br>8695652 |
| GO:0014821 | BP | GO:0014821 | smooth muscle contractio                                          | 1/42 | 23/18903  | 0.04990156<br>45967221 | 0.13369558<br>4647243 | 0.08820423<br>16321272 | EDN1            | 1 | 0.43478260<br>8695652 |

|            |    |            |                                                                             |       |           |                          |                          |                          |                                                                    |    |                       |
|------------|----|------------|-----------------------------------------------------------------------------|-------|-----------|--------------------------|--------------------------|--------------------------|--------------------------------------------------------------------|----|-----------------------|
| GO:0033139 | BP | GO:0033139 | regulation of peptidyl-serine phosphorylation of STAT protein SNARE complex | 1/42  | 23/18903  | 0.04990156<br>45967221   | 0.13369558<br>4647243    | 0.08820423<br>16321272   | GADD45A                                                            | 1  | 0.43478260<br>8695652 |
| GO:0035493 | BP | GO:0035493 | positive regulation of embryonic development                                | 1/42  | 23/18903  | 0.04990156<br>45967221   | 0.13369558<br>4647243    | 0.08820423<br>16321272   | UVRAG                                                              | 1  | 0.43478260<br>8695652 |
| GO:0040019 | BP | GO:0040019 | regulation of centriole replication                                         | 1/42  | 23/18903  | 0.04990156<br>45967221   | 0.13369558<br>4647243    | 0.08820423<br>16321272   | PAFAH1B1                                                           | 1  | 0.43478260<br>8695652 |
| GO:0046599 | BP | GO:0046599 | maintenance of protein location                                             | 1/42  | 23/18903  | 0.04990156<br>45967221   | 0.13369558<br>4647243    | 0.08820423<br>16321272   | PLK2                                                               | 1  | 0.43478260<br>8695652 |
| GO:0051457 | BP | GO:0051457 | neuronal stem cell population                                               | 1/42  | 23/18903  | 0.04990156<br>45967221   | 0.13369558<br>4647243    | 0.08820423<br>16321272   | SUN2                                                               | 1  | 0.43478260<br>8695652 |
| GO:0097150 | BP | GO:0097150 | maintenance of protein location                                             | 1/42  | 23/18903  | 0.04990156<br>45967221   | 0.13369558<br>4647243    | 0.08820423<br>16321272   | ASPM                                                               | 1  | 0.43478260<br>8695652 |
| GO:0098687 | CC | GO:0098687 | chromosomal region                                                          | 10/42 | 388/19869 | 6.05776792<br>788562e-09 | 9.38954028<br>822271e-07 | 5.86646999<br>332081e-07 | SMC4/TOP2A<br>/UVRAG/CLASP2/NDC80/<br>SPDL1/PAFAH1B1/ATM/RPA1/CDK2 | 10 | 0.25773195<br>8762887 |

|            |    |            |                                           |       |           |                          |                          |                          |                                                                                                                                                                                                                                                                                                                                                                                                                                                             |    |                       |
|------------|----|------------|-------------------------------------------|-------|-----------|--------------------------|--------------------------|--------------------------|-------------------------------------------------------------------------------------------------------------------------------------------------------------------------------------------------------------------------------------------------------------------------------------------------------------------------------------------------------------------------------------------------------------------------------------------------------------|----|-----------------------|
| GO:0005819 | CC | GO:0005819 | spindle                                   | 10/42 | 426/19869 | 1.47278803<br>11365e-08  | 1.14141072<br>413079e-06 | 7.13139467<br>708199e-07 | PLK2/SHCBP<br>1L/KIF11/C<br>LASP2/MAPK<br>1/SPDL1/PA<br>FAH1B1/ASP<br>M/ATM/MTUS<br>SMC4/TOP2A<br>/CLASP2/ND<br>C80/SPDL1/<br>PAFAH1B1/C<br>CNB1IP1/CD<br>SMC4/TOP2A<br>/UVRAG/CLA<br>SP2/NDC80/<br>SPDL1/PAFA<br>TOP2A/CCDC<br>102B/CEP55<br>/PLK2/CETN<br>KIF11/CEP5<br>7/CLASP2/P<br>FAH1B1/ND<br>RG1/ASPM/M<br>NDC80/SPDL<br>1<br>SHCBP1L/AS<br>PM<br>CLASP2/NDC<br>80/SPDL1/P<br>FAH1B1<br>RPGR/MARK4<br>/SSX2IP/CE<br>TN2<br>PLK2/KIF11<br>/SPDL1/ASP | 10 | 0.23474178<br>4037559 |
| GO:0000793 | CC | GO:0000793 | condensed<br>chromosome                   | 8/42  | 273/19869 | 9.02991104<br>798593e-08 | 4.66545404<br>14594e-06  | 2.91491865<br>408669e-06 |                                                                                                                                                                                                                                                                                                                                                                                                                                                             | 8  | 0.29304029<br>3040293 |
| GO:0000775 | CC | GO:0000775 | chromosome<br>,<br>centromeri<br>c region | 7/42  | 250/19869 | 8.50725031<br>107328e-07 | 3.29655949<br>554089e-05 | 2.05965007<br>531248e-05 |                                                                                                                                                                                                                                                                                                                                                                                                                                                             | 7  | 0.28                  |
| GO:0005814 | CC | GO:0005814 | centriole                                 | 5/42  | 157/19869 | 1.94150509<br>97271e-05  | 0.00060186<br>65809154   | 0.00037603<br>8882473459 |                                                                                                                                                                                                                                                                                                                                                                                                                                                             | 5  | 0.31847133<br>7579618 |
| GO:0005874 | CC | GO:0005874 | microtubul<br>e                           | 7/42  | 466/19869 | 4.94711485<br>282069e-05 | 0.00127800<br>467031201  | 0.00079848<br>1695542988 |                                                                                                                                                                                                                                                                                                                                                                                                                                                             | 7  | 0.15021459<br>2274678 |
| GO:0000940 | CC | GO:0000940 | outer<br>kinetochor                       | 2/42  | 12/19869  | 0.00028406<br>4573292334 | 0.00607935<br>896131264  | 0.00379830<br>916428362  |                                                                                                                                                                                                                                                                                                                                                                                                                                                             | 2  | 1.66666666<br>666667  |
| GO:0072687 | CC | GO:0072687 | meiotic<br>spindle                        | 2/42  | 14/19869  | 0.00039061<br>5504810665 | 0.00607935<br>896131264  | 0.00379830<br>916428362  |                                                                                                                                                                                                                                                                                                                                                                                                                                                             | 2  | 1.42857142<br>857143  |
| GO:0000776 | CC | GO:0000776 | kinetochor<br>e                           | 4/42  | 164/19869 | 0.00039221<br>6707181461 | 0.00607935<br>896131264  | 0.00379830<br>916428362  |                                                                                                                                                                                                                                                                                                                                                                                                                                                             | 4  | 0.24390243<br>902439  |
| GO:0036064 | CC | GO:0036064 | ciliary<br>basal body                     | 4/42  | 164/19869 | 0.00039221<br>6707181461 | 0.00607935<br>896131264  | 0.00379830<br>916428362  |                                                                                                                                                                                                                                                                                                                                                                                                                                                             | 4  | 0.24390243<br>902439  |
| GO:0000922 | CC | GO:0000922 | spindle<br>pole                           | 4/42  | 172/19869 | 0.00046958<br>508504975  | 0.00633577<br>498081761  | 0.00395851<br>475881304  |                                                                                                                                                                                                                                                                                                                                                                                                                                                             | 4  | 0.23255813<br>9534884 |

|            |    |            |                                                                                             |      |           |                          |                         |                         |                                             |   |                       |
|------------|----|------------|---------------------------------------------------------------------------------------------|------|-----------|--------------------------|-------------------------|-------------------------|---------------------------------------------|---|-----------------------|
| GO:0000779 | CC | GO:0000779 | condensed chromosome, centromeri                                                            | 4/42 | 174/19869 | 0.00049051<br>1611418138 | 0.00633577<br>498081761 | 0.00395851<br>475881304 | CLASP2/NDC80/SPDL1/PFAFH1B1                 | 4 | 0.22988505<br>7471264 |
| GO:0072686 | CC | GO:0072686 | mitotic spindle                                                                             | 4/42 | 183/19869 | 0.00059298<br>345140763  | 0.00707018<br>730524482 | 0.00441736<br>660157911 | KIF11/CLASP2/MAPK1/ASPM                     | 4 | 0.21857923<br>4972678 |
| GO:0005876 | CC | GO:0005876 | spindle microtubul                                                                          | 3/42 | 87/19869  | 0.00082280<br>3450307804 | 0.00902907<br>006908036 | 0.00564125<br>26068278  | KIF11/CLASP2/PFAFH1B                        | 3 | 0.34482758<br>6206897 |
| GO:0030496 | CC | GO:0030496 | midbody                                                                                     | 4/42 | 203/19869 | 0.00087378<br>0974427132 | 0.00902907<br>006908036 | 0.00564125<br>26068278  | CEP55/MARK4/UVRAG/ASMC4/TOP2A/CCNB1IP1/RPA1 | 4 | 0.19704433<br>4975369 |
| GO:0000228 | CC | GO:0000228 | nuclear chromosome                                                                          | 4/42 | 249/19869 | 0.00185434<br>026090698  | 0.01696805<br>58198318  | 0.01060143<br>38568728  | ATF4/INSR/CLASP2/SSX2IP/PFAFH1              | 4 | 0.16064257<br>0281124 |
| GO:0031252 | CC | GO:0031252 | cell leading edge                                                                           | 5/42 | 421/19869 | 0.00186101<br>2573788    | 0.01696805<br>58198318  | 0.01060143<br>38568728  | CCNL1/INSR/CDK2                             | 5 | 0.11876484<br>5605701 |
| GO:1902911 | CC | GO:1902911 | protein kinase complex                                                                      | 3/42 | 136/19869 | 0.00296269<br>603839023  | 0.02551210<br>4775027   | 0.01593965<br>1200696   | ATF4/INSR                                   | 3 | 0.22058823<br>5294118 |
| GO:0032590 | CC | GO:0032590 | dendrite membrane transferase complex, transferring phosphorus - containing kinesin complex | 2/42 | 41/19869  | 0.00339487<br>514589622  | 0.02650008<br>48149935  | 0.01655692<br>90524917  | CCNL1/INSR/UVRAG/CDK2                       | 2 | 0.48780487<br>804878  |
| GO:0061695 | CC | GO:0061695 | phosphorus - containing kinesin complex                                                     | 4/42 | 295/19869 | 0.00341936<br>57825798   | 0.02650008<br>48149935  | 0.01655692<br>90524917  | KIF11/PFAFH1B1                              | 4 | 0.13559322<br>0338983 |
| GO:0005871 | CC | GO:0005871 | kinesin complex                                                                             | 2/42 | 49/19869  | 0.00481700<br>183614977  | 0.03456802<br>19924866  | 0.02159767<br>75776487  |                                             | 2 | 0.40816326<br>5306122 |

|            |    |            |                                                                     |      |           |                         |                        |                        |                                  |   |                        |
|------------|----|------------|---------------------------------------------------------------------|------|-----------|-------------------------|------------------------|------------------------|----------------------------------|---|------------------------|
| GO:0000307 | CC | GO:0000307 | cyclin-<br>dependent<br>protein<br>kinase                           | 2/42 | 50/19869  | 0.00501101<br>69445554  | 0.03456802<br>19924866 | 0.02159767<br>75776487 | CCNL1/CDK2                       | 2 | 0.4                    |
| GO:0001673 | CC | GO:0001673 | holoenzyme<br>complex<br>male germ<br>cell<br>nucleus<br>chromosome | 2/42 | 51/19869  | 0.00520859<br>197970281 | 0.03456802<br>19924866 | 0.02159767<br>75776487 | TOP2A/CDK2                       | 2 | 0.39215686<br>2745098  |
| GO:0000781 | CC | GO:0000781 | ,<br>telomeric<br>leading<br>edge                                   | 3/42 | 168/19869 | 0.00535246<br>792141728 | 0.03456802<br>19924866 | 0.02159767<br>75776487 | ATM/RPA1/C<br>DK2                | 3 | 0.17857142<br>8571429  |
| GO:0031256 | CC | GO:0031256 | membrane<br>neuron<br>projection<br>membrane                        | 3/42 | 177/19869 | 0.00618365<br>998768298 | 0.03833869<br>19236345 | 0.02395354<br>60575509 | ATF4/INSR/<br>CLASP2             | 3 | 0.16949152<br>5423729  |
| GO:0032589 | CC | GO:0032589 | germ cell<br>nucleus                                                | 2/42 | 60/19869  | 0.00714447<br>420143196 | 0.04259205<br>77393059 | 0.02661099<br>70255765 | ATF4/INSR                        | 2 | 0.33333333<br>3333333  |
| GO:0043073 | CC | GO:0043073 | nuclear<br>speck                                                    | 2/42 | 66/19869  | 0.00858919<br>375181465 | 0.04930833<br>45011582 | 0.03080724<br>46458849 | TOP2A/CDK2                       | 2 | 0.30303030<br>3030303  |
| GO:0016607 | CC | GO:0016607 | condensed<br>nuclear<br>chromosome                                  | 4/42 | 419/19869 | 0.01160053<br>08541801  | 0.06421722<br>4371354  | 0.04012213<br>67888935 | GADD45A/CC<br>NL1/ATF4/S<br>MC4  | 4 | 0.09546539<br>37947494 |
| GO:0000794 | CC | GO:0000794 | caveola                                                             | 2/42 | 79/19869  | 0.01212562<br>34296861  | 0.06480936<br>66069432 | 0.04049210<br>00192786 | SMC4/CCNB1<br>IP1                | 2 | 0.25316455<br>6962025  |
| GO:0005901 | CC | GO:0005901 | motile<br>cilium                                                    | 2/42 | 82/19869  | 0.01301815<br>52655853  | 0.06726046<br>88721907 | 0.04202351<br>87520648 | INSR/MAPK1                       | 2 | 0.24390243<br>902439   |
| GO:0031514 | CC | GO:0031514 | nuclear<br>envelope                                                 | 3/42 | 244/19869 | 0.01476455<br>60137682  | 0.07382278<br>0068841  | 0.04612357<br>05693268 | RPGR/PFAFH<br>1B1/CETN2          | 3 | 0.12295081<br>9672131  |
| GO:0005635 | CC | GO:0005635 |                                                                     | 4/42 | 488/19869 | 0.01927071<br>01405718  | 0.07926984<br>68022184 | 0.04952683<br>12788054 | INSR/SUN2/<br>PFAFH1B1/C<br>ETN2 | 4 | 0.08196721<br>31147541 |

|            |    |            |                                                          |      |           |                        |                        |                        |                      |   |                       |
|------------|----|------------|----------------------------------------------------------|------|-----------|------------------------|------------------------|------------------------|----------------------|---|-----------------------|
| GO:0005881 | CC | GO:0005881 | cytoplasmic                                              | 2/42 | 102/19869 | 0.01966278<br>59546049 | 0.07926984<br>68022184 | 0.04952683<br>12788054 | CLASP2/PAF<br>AH1B1  | 2 | 0.19607843<br>1372549 |
| GO:0000805 | CC | GO:0000805 | X chromosome<br>extrinsic<br>component<br>of             | 1/42 | 10/19869  | 0.02094320<br>93800328 | 0.07926984<br>68022184 | 0.04952683<br>12788054 | CDK2                 | 1 | 1                     |
| GO:0031313 | CC | GO:0031313 | endosome<br>NMS<br>complex                               | 1/42 | 10/19869  | 0.02094320<br>93800328 | 0.07926984<br>68022184 | 0.04952683<br>12788054 | SNX10<br>NDC80       | 1 | 1                     |
| GO:0034451 | CC | GO:0034451 | centriolar<br>satellite                                  | 2/42 | 108/19869 | 0.02188160<br>42696854 | 0.07926984<br>68022184 | 0.04952683<br>12788054 | CEP72/SSX2<br>IP     | 2 | 0.18518518<br>5185185 |
| GO:0005770 | CC | GO:0005770 | late<br>endosome<br>nucleotide                           | 3/42 | 288/19869 | 0.02282290<br>57910357 | 0.07926984<br>68022184 | 0.04952683<br>12788054 | INSR/UVRAG<br>/MAPK1 | 3 | 0.10416666<br>6666667 |
| GO:0000109 | CC | GO:0000109 | -excision<br>repair<br>complex                           | 1/42 | 11/19869  | 0.02301382<br>64909666 | 0.07926984<br>68022184 | 0.04952683<br>12788054 | CETN2                | 1 | 0.90909090<br>9090909 |
| GO:0000235 | CC | GO:0000235 | astral<br>microtubul                                     | 1/42 | 11/19869  | 0.02301382<br>64909666 | 0.07926984<br>68022184 | 0.04952683<br>12788054 | PAFAH1B1             | 1 | 0.90909090<br>9090909 |
| GO:0005818 | CC | GO:0005818 | aster<br>microtubul                                      | 1/42 | 11/19869  | 0.02301382<br>64909666 | 0.07926984<br>68022184 | 0.04952683<br>12788054 | PAFAH1B1             | 1 | 0.90909090<br>9090909 |
| GO:0034992 | CC | GO:0034992 | organizing<br>center<br>attachment<br>meiotic<br>nuclear | 1/42 | 11/19869  | 0.02301382<br>64909666 | 0.07926984<br>68022184 | 0.04952683<br>12788054 | SUN2                 | 1 | 0.90909090<br>9090909 |
| GO:0034993 | CC | GO:0034993 | membrane<br>microtubul<br>e<br>tethering                 | 1/42 | 11/19869  | 0.02301382<br>64909666 | 0.07926984<br>68022184 | 0.04952683<br>12788054 | SUN2                 | 1 | 0.90909090<br>9090909 |

|            |    |            |                                                      |      |           |                        |                        |                        |            |   |                       |
|------------|----|------------|------------------------------------------------------|------|-----------|------------------------|------------------------|------------------------|------------|---|-----------------------|
| GO:0106083 | CC | GO:0106083 | nuclear<br>membrane<br>protein<br>complex            | 1/42 | 11/19869  | 0.02301382<br>64909666 | 0.07926984<br>68022184 | 0.04952683<br>12788054 | SUN2       | 1 | 0.90909090<br>9090909 |
| GO:0106094 | CC | GO:0106094 | nuclear<br>membrane<br>microtubul<br>e               | 1/42 | 11/19869  | 0.02301382<br>64909666 | 0.07926984<br>68022184 | 0.04952683<br>12788054 | SUN2       | 1 | 0.90909090<br>9090909 |
| GO:0044853 | CC | GO:0044853 | tethering<br>plasma<br>membrane<br>raft              | 2/42 | 113/19869 | 0.02380640<br>06549541 | 0.08021721<br>95982151 | 0.05011873<br>82209561 | INSR/MAPK1 | 2 | 0.17699115<br>0442478 |
| GO:0044615 | CC | GO:0044615 | nuclear<br>pore<br>nuclear<br>basket                 | 1/42 | 12/19869  | 0.02508016<br>84834829 | 0.08271119<br>39348905 | 0.05167694<br>28998976 | CETN2      | 1 | 0.83333333<br>3333333 |
| GO:0043601 | CC | GO:0043601 | nuclear<br>replisome                                 | 1/42 | 13/19869  | 0.02714224<br>39693911 | 0.08506196<br>58255387 | 0.05314567<br>64410836 | RPA1       | 1 | 0.76923076<br>9230769 |
| GO:0097733 | CC | GO:0097733 | photorecep<br>tor cell<br>cilium                     | 2/42 | 122/19869 | 0.02743934<br>38146899 | 0.08506196<br>58255387 | 0.05314567<br>64410836 | RPGR/CETN2 | 2 | 0.16393442<br>6229508 |
| GO:1902554 | CC | GO:1902554 | serine/thr<br>eonine<br>protein<br>kinase<br>complex | 2/42 | 122/19869 | 0.02743934<br>38146899 | 0.08506196<br>58255387 | 0.05314567<br>64410836 | CCNL1/CDK2 | 2 | 0.16393442<br>6229508 |
| GO:0030894 | CC | GO:0030894 | replisome                                            | 1/42 | 15/19869  | 0.03125362<br>9784092  | 0.09498652<br>18928285 | 0.05934641<br>77530745 | RPA1       | 1 | 0.66666666<br>6666667 |
| GO:0097731 | CC | GO:0097731 | 9+0 non-<br>motile<br>cilium                         | 2/42 | 134/19869 | 0.03260644<br>92115046 | 0.09719230<br>05342924 | 0.06072456<br>12845834 | RPGR/CETN2 | 2 | 0.14925373<br>1343284 |
| GO:0000930 | CC | GO:0000930 | gamma-<br>tubulin<br>complex                         | 1/42 | 16/19869  | 0.03330295<br>72520617 | 0.09739544<br>10201804 | 0.06085148<br>09769548 | MARK4      | 1 | 0.625                 |

|            |    |            |                                             |      |           |                        |                       |                        |                      |   |                        |
|------------|----|------------|---------------------------------------------|------|-----------|------------------------|-----------------------|------------------------|----------------------|---|------------------------|
| GO:0031253 | CC | GO:0031253 | cell projection membrane integral component | 3/42 | 344/19869 | 0.03593456<br>03420255 | 0.10167163<br>55229   | 0.06352319<br>50295877 | ATF4/INSR/<br>CLASP2 | 3 | 0.08720930<br>23255814 |
| GO:0005639 | CC | GO:0005639 | of nuclear inner membrane                   | 1/42 | 18/19869  | 0.03738892<br>40310019 | 0.10167163<br>55229   | 0.06352319<br>50295877 | SUN2                 | 1 | 0.55555555<br>5555556  |
| GO:0031143 | CC | GO:0031143 | pseudopodium intrinsic component            | 1/42 | 18/19869  | 0.03738892<br>40310019 | 0.10167163<br>55229   | 0.06352319<br>50295877 | MAPK1                | 1 | 0.55555555<br>5555556  |
| GO:0031229 | CC | GO:0031229 | of nuclear inner membrane                   | 1/42 | 18/19869  | 0.03738892<br>40310019 | 0.10167163<br>55229   | 0.06352319<br>50295877 | SUN2                 | 1 | 0.55555555<br>5555556  |
| GO:0005828 | CC | GO:0005828 | kinetochore                                 | 1/42 | 20/19869  | 0.04145803<br>00339422 | 0.11079301<br>1297604 | 0.06922211<br>91129344 | CLASP2               | 1 | 0.5                    |
| GO:0005680 | CC | GO:0005680 | anaphase-promoting complex                  | 1/42 | 21/19869  | 0.04348628<br>14692074 | 0.11424362<br>0808935 | 0.07137801<br>77549881 | CUL7                 | 1 | 0.47619047<br>6190476  |
| GO:1990391 | CC | GO:1990391 | DNA repair complex                          | 1/42 | 22/19869  | 0.04551034<br>31468723 | 0.11756838<br>6462753 | 0.07345529<br>06931974 | ATM                  | 1 | 0.45454545<br>4545455  |
| GO:0097729 | CC | GO:0097729 | 9+2 motile cilium                           | 2/42 | 165/19869 | 0.04752830<br>18296412 | 0.12011193<br>6527821 | 0.07504446<br>96812194 | RPGR/CETN2           | 2 | 0.12121212<br>1212121  |
| GO:0005875 | CC | GO:0005875 | microtubule associated                      | 2/42 | 166/19869 | 0.04804477<br>46111285 | 0.12011193<br>6527821 | 0.07504446<br>96812194 | KIF11/PAFA<br>H1B1   | 2 | 0.12048192<br>7710843  |
| GO:0097730 | CC | GO:0097730 | non-motile cilium                           | 2/42 | 168/19869 | 0.04908393<br>53677109 | 0.12076206<br>3206273 | 0.07545066<br>08826968 | RPGR/CETN2           | 2 | 0.11904761<br>9047619  |

|            |    |            |                                  |      |           |                          |                          |                          |                                                                              |   |                       |
|------------|----|------------|----------------------------------|------|-----------|--------------------------|--------------------------|--------------------------|------------------------------------------------------------------------------|---|-----------------------|
| GO:0008017 | MF | GO:0008017 | microtubule binding              | 9/42 | 271/18432 | 8.20308361<br>117646e-09 | 1.27147795<br>973235e-06 | 9.41195909<br>071825e-07 | MARK4/SUN2<br>/KIF11/CEP<br>57/CLASP2/<br>PAFAH1B1/N<br>DRG1/CETN2<br>/MTUS1 | 9 | 0.33210332<br>103321  |
| GO:0015631 | MF | GO:0015631 | tubulin binding                  | 9/42 | 375/18432 | 1.33725764<br>402759e-07 | 1.03637467<br>412138e-05 | 7.67163595<br>784249e-06 | MARK4/SUN2<br>/KIF11/CEP<br>57/CLASP2/<br>PAFAH1B1/N<br>DRG1/CETN2<br>/MTUS1 | 9 | 0.24                  |
| GO:0043015 | MF | GO:0043015 | gamma-tubulin binding            | 3/42 | 34/18432  | 6.26719221<br>220885e-05 | 0.00323804<br>930964124  | 0.00239692<br>614431847  | MARK4/CEP5<br>7/NDRG1                                                        | 3 | 0.88235294<br>1176471 |
| GO:0035173 | MF | GO:0035173 | histone kinase activity          | 2/42 | 20/18432  | 0.00093833<br>9036022657 | 0.03210405<br>77408181   | 0.02376463<br>35738484   | ATM/CDK2                                                                     | 2 | 1                     |
| GO:0051010 | MF | GO:0051010 | microtubule plus-end binding     | 2/42 | 21/18432  | 0.00103561<br>476583284  | 0.03210405<br>77408181   | 0.02376463<br>35738484   | CLASP2/PAF<br>AH1B1                                                          | 2 | 0.95238095<br>2380952 |
| GO:0106310 | MF | GO:0106310 | protein serine kinase activity   | 5/42 | 363/18432 | 0.00134734<br>67103423   | 0.03480645<br>66838428   | 0.02576505<br>11275984   | MARK4/PLK2<br>/MAPK1/ATM<br>/CDK2                                            | 5 | 0.13774104<br>6831956 |
| GO:0030332 | MF | GO:0030332 | cyclin binding protein           | 2/42 | 34/18432  | 0.00271516<br>222307768  | 0.05467639<br>1393471    | 0.04047352<br>57174081   | NDC80/CDK2                                                                   | 2 | 0.58823529<br>4117647 |
| GO:0004674 | MF | GO:0004674 | serine/threonine kinase activity | 5/42 | 430/18432 | 0.00282200<br>729772753  | 0.05467639<br>1393471    | 0.04047352<br>57174081   | MARK4/PLK2<br>/MAPK1/ATM<br>/CDK2                                            | 5 | 0.11627906<br>9767442 |

|            |    |            |                                                       |      |           |                         |                       |                        |                            |   |                       |
|------------|----|------------|-------------------------------------------------------|------|-----------|-------------------------|-----------------------|------------------------|----------------------------|---|-----------------------|
| GO:0046982 | MF | GO:0046982 | protein heterodimerization activity promoter-specific | 4/42 | 341/18432 | 0.00740695<br>749209698 | 0.12756426<br>7919448 | 0.09442787<br>91390142 | GADD45A/ATF4/TOP2A/PFAH1B1 | 4 | 0.11730205<br>2785924 |
| GO:1990841 | MF | GO:1990841 | specific chromatin binding                            | 2/42 | 63/18432  | 0.00906605<br>352461705 | 0.14052382<br>9631564 | 0.10402103<br>5177185  | GADD45A/ATF4               | 2 | 0.31746031<br>7460317 |
| GO:0051219 | MF | GO:0051219 | phosphoprotein                                        | 2/42 | 92/18432  | 0.01864126<br>47707552  | 0.15659096<br>3166545 | 0.11591453<br>3006135  | MAPK1/PAFAH1B1             | 2 | 0.21739130<br>4347826 |
| GO:0043130 | MF | GO:0043130 | ubiquitin binding                                     | 2/42 | 96/18432  | 0.02019104<br>73970374  | 0.15659096<br>3166545 | 0.11591453<br>3006135  | TOP2A/MARK4                | 2 | 0.20833333<br>3333333 |
| GO:0008330 | MF | GO:0008330 | protein tyrosine/threonine phosphatase activity       | 1/42 | 10/18432  | 0.02255967<br>41371858  | 0.15659096<br>3166545 | 0.11591453<br>3006135  | DUSP1                      | 1 | 1                     |
| GO:0008401 | MF | GO:0008401 | retinoic acid 4-hydroxylase activity                  | 1/42 | 10/18432  | 0.02255967<br>41371858  | 0.15659096<br>3166545 | 0.11591453<br>3006135  | CYP26B1                    | 1 | 1                     |
| GO:0016303 | MF | GO:0016303 | 1-phosphatidylinositol 3-kinase activity              | 1/42 | 10/18432  | 0.02255967<br>41371858  | 0.15659096<br>3166545 | 0.11591453<br>3006135  | ATM                        | 1 | 1                     |
| GO:0098505 | MF | GO:0098505 | G-rich strand telomeric DNA                           | 1/42 | 10/18432  | 0.02255967<br>41371858  | 0.15659096<br>3166545 | 0.11591453<br>3006135  | RPA1                       | 1 | 1                     |
| GO:0047485 | MF | GO:0047485 | protein N-terminus binding                            | 2/42 | 106/18432 | 0.02429183<br>64474281  | 0.15659096<br>3166545 | 0.11591453<br>3006135  | GADD45A/ATM                | 2 | 0.18867924<br>5283019 |

|            |    |            |                                                                       |      |           |                        |                       |                       |                 |   |                       |
|------------|----|------------|-----------------------------------------------------------------------|------|-----------|------------------------|-----------------------|-----------------------|-----------------|---|-----------------------|
| GO:0002162 | MF | GO:0002162 | dystroglycan binding<br>leucine                                       | 1/42 | 11/18432  | 0.02478812<br>34741874 | 0.15659096<br>3166545 | 0.11591453<br>3006135 | CLASP2          | 1 | 0.90909090<br>9090909 |
| GO:0043522 | MF | GO:0043522 | zipper domain<br>binding                                              | 1/42 | 11/18432  | 0.02478812<br>34741874 | 0.15659096<br>3166545 | 0.11591453<br>3006135 | ATF4            | 1 | 0.90909090<br>9090909 |
| GO:0034452 | MF | GO:0034452 | dynactin binding<br>phosphatidyl                                      | 1/42 | 12/18432  | 0.02701161<br>2905493  | 0.15659096<br>3166545 | 0.11591453<br>3006135 | PAFAH1B1        | 1 | 0.83333333<br>3333333 |
| GO:0035004 | MF | GO:0035004 | inositol 3-kinase<br>activity                                         | 1/42 | 12/18432  | 0.02701161<br>2905493  | 0.15659096<br>3166545 | 0.11591453<br>3006135 | ATM             | 1 | 0.83333333<br>3333333 |
| GO:0043047 | MF | GO:0043047 | single-stranded<br>telomeric DNA<br>ubiquitin-                        | 1/42 | 12/18432  | 0.02701161<br>2905493  | 0.15659096<br>3166545 | 0.11591453<br>3006135 | RPA1            | 1 | 0.83333333<br>3333333 |
| GO:0032182 | MF | GO:0032182 | like protein<br>binding<br>RNA<br>polymerase<br>II CTD                | 2/42 | 116/18432 | 0.02870328<br>27446192 | 0.15659096<br>3166545 | 0.11591453<br>3006135 | TOP2A/MARK<br>4 | 2 | 0.17241379<br>3103448 |
| GO:0008353 | MF | GO:0008353 | heptapeptide repeat<br>kinase<br>activity<br>MAP kinase<br>tyrosine/s | 1/42 | 13/18432  | 0.02923015<br>32017996 | 0.15659096<br>3166545 | 0.11591453<br>3006135 | MAPK1           | 1 | 0.76923076<br>9230769 |
| GO:0017017 | MF | GO:0017017 | erine/threonine<br>phosphatase<br>activity                            | 1/42 | 13/18432  | 0.02923015<br>32017996 | 0.15659096<br>3166545 | 0.11591453<br>3006135 | DUSP1           | 1 | 0.76923076<br>9230769 |

|            |    |            |                                                                 |      |           |                        |                       |                       |           |   |                       |
|------------|----|------------|-----------------------------------------------------------------|------|-----------|------------------------|-----------------------|-----------------------|-----------|---|-----------------------|
| GO:0031994 | MF | GO:0031994 | insulin-like growth factor I insulin receptor substrate binding | 1/42 | 13/18432  | 0.02923015<br>32017996 | 0.15659096<br>3166545 | 0.11591453<br>3006135 | INSR      | 1 | 0.76923076<br>9230769 |
| GO:0043560 | MF | GO:0043560 | pre-mRNA intronic binding                                       | 1/42 | 13/18432  | 0.02923015<br>32017996 | 0.15659096<br>3166545 | 0.11591453<br>3006135 | INSR      | 1 | 0.76923076<br>9230769 |
| GO:0097157 | MF | GO:0097157 | sequence-specific single stranded DNA                           | 1/42 | 13/18432  | 0.02923015<br>32017996 | 0.15659096<br>3166545 | 0.11591453<br>3006135 | RBM7      | 1 | 0.76923076<br>9230769 |
| GO:0098847 | MF | GO:0098847 | single stranded DNA                                             | 1/42 | 14/18432  | 0.03144375<br>51109983 | 0.15659096<br>3166545 | 0.11591453<br>3006135 | RPA1      | 1 | 0.71428571<br>4285714 |
| GO:0003697 | MF | GO:0003697 | single-stranded DNA                                             | 2/42 | 124/18432 | 0.03244574<br>64427051 | 0.15659096<br>3166545 | 0.11591453<br>3006135 | SMC4/RPA1 | 2 | 0.16129032<br>2580645 |
| GO:0005545 | MF | GO:0005545 | 1-phosphatidylinositol binding                                  | 1/42 | 15/18432  | 0.03365242<br>93582201 | 0.15659096<br>3166545 | 0.11591453<br>3006135 | SNX10     | 1 | 0.66666666<br>6666667 |
| GO:0004707 | MF | GO:0004707 | MAP kinase activity                                             | 1/42 | 16/18432  | 0.03585618<br>6645887  | 0.15659096<br>3166545 | 0.11591453<br>3006135 | MAPK1     | 1 | 0.625                 |
| GO:0005159 | MF | GO:0005159 | insulin-like growth factor receptor                             | 1/42 | 16/18432  | 0.03585618<br>6645887  | 0.15659096<br>3166545 | 0.11591453<br>3006135 | INSR      | 1 | 0.625                 |
| GO:0005521 | MF | GO:0005521 | lamin binding                                                   | 1/42 | 16/18432  | 0.03585618<br>6645887  | 0.15659096<br>3166545 | 0.11591453<br>3006135 | SUN2      | 1 | 0.625                 |
| GO:0030275 | MF | GO:0030275 | LRR domain binding                                              | 1/42 | 16/18432  | 0.03585618<br>6645887  | 0.15659096<br>3166545 | 0.11591453<br>3006135 | ATF4      | 1 | 0.625                 |

|            |    |            |                                         |      |           |                        |                       |                       |            |   |                       |
|------------|----|------------|-----------------------------------------|------|-----------|------------------------|-----------------------|-----------------------|------------|---|-----------------------|
| GO:0019838 | MF | GO:0019838 | growth factor binding plus-end-directed | 2/42 | 132/18432 | 0.03636951<br>40257783 | 0.15659096<br>3166545 | 0.11591453<br>3006135 | INSR/CEP57 | 2 | 0.15151515<br>1515152 |
| GO:0008574 | MF | GO:0008574 | microtubule motor activity              | 1/42 | 17/18432  | 0.03805503<br>76537536 | 0.15661666<br>2680724 | 0.11593355<br>6755171 | KIF11      | 1 | 0.58823529<br>4117647 |
| GO:0004708 | MF | GO:0004708 | MAP kinase activity                     | 1/42 | 18/18432  | 0.04024899<br>30389579 | 0.15661666<br>2680724 | 0.11593355<br>6755171 | MAPK1      | 1 | 0.55555555<br>5555556 |
| GO:0033549 | MF | GO:0033549 | MAP kinase phosphatase activity         | 1/42 | 18/18432  | 0.04024899<br>30389579 | 0.15661666<br>2680724 | 0.11593355<br>6755171 | DUSP1      | 1 | 0.55555555<br>5555556 |
| GO:0005520 | MF | GO:0005520 | insulin-like growth factor              | 1/42 | 19/18432  | 0.04243806<br>3436067  | 0.15661666<br>2680724 | 0.11593355<br>6755171 | INSR       | 1 | 0.52631578<br>9473684 |
| GO:0008301 | MF | GO:0008301 | DNA binding, bending                    | 1/42 | 19/18432  | 0.04243806<br>3436067  | 0.15661666<br>2680724 | 0.11593355<br>6755171 | TOP2A      | 1 | 0.52631578<br>9473684 |
| GO:0052742 | MF | GO:0052742 | phosphatidylinositol kinase activity    | 1/42 | 19/18432  | 0.04243806<br>3436067  | 0.15661666<br>2680724 | 0.11593355<br>6755171 | ATM        | 1 | 0.52631578<br>9473684 |
| GO:0001972 | MF | GO:0001972 | retinoic acid binding                   | 1/42 | 20/18432  | 0.04462225<br>94571217 | 0.15719205<br>0360315 | 0.11635948<br>0402542 | CYP26B1    | 1 | 0.5                   |
| GO:0016500 | MF | GO:0016500 | protein-hormone receptor activity       | 1/42 | 20/18432  | 0.04462225<br>94571217 | 0.15719205<br>0360315 | 0.11635948<br>0402542 | INSR       | 1 | 0.5                   |

|            |    |            |                                                                   |      |          |                        |                       |                       |       |   |                       |
|------------|----|------------|-------------------------------------------------------------------|------|----------|------------------------|-----------------------|-----------------------|-------|---|-----------------------|
| GO:0031683 | MF | GO:0031683 | G-protein<br>beta/gamma<br>-subunit<br>complex<br>binding<br>tau- | 1/42 | 22/18432 | 0.04897607<br>07068921 | 0.16502806<br>4338441 | 0.12215999<br>3296367 | CETN2 | 1 | 0.45454545<br>4545455 |
| GO:0050321 | MF | GO:0050321 | protein<br>kinase                                                 | 1/42 | 22/18432 | 0.04897607<br>07068921 | 0.16502806<br>4338441 | 0.12215999<br>3296367 | MARK4 | 1 | 0.45454545<br>4545455 |

| Table S6      | ONTOLOGY ID | Description                                     | GeneRatio | BgRatio   | pvalue                         | p.adjust                     | qvalue                        | geneID                                                                | Count | richFactor        |
|---------------|-------------|-------------------------------------------------|-----------|-----------|--------------------------------|------------------------------|-------------------------------|-----------------------------------------------------------------------|-------|-------------------|
|               |             | extracellular matrix organization               |           |           |                                |                              |                               | COL1A1/MMP2/COL1A2/TGFB                                               |       |                   |
| GO:0030198 BP | GO:0030198  | matrix organization                             | 84/1414   | 318/18903 | 2.77935033598078e-25           | 8.11431889197655e-22         | 5.19980625396496e-22          | I/COL14A1/COL12A1/COL5A1/COL5A2/COL3A1/SERPINH                        | 84    | 0.264150943396226 |
| GO:0043062 BP | GO:0043062  | extracellular structure organization            | 84/1414   | 319/18903 | 3.5068759474673e-25            | 8.11431889197655e-22         | 5.19980625396496e-22          | COL1A1/MMP2/COL1A2/TGFB                                               | 84    | 0.263322884012539 |
| GO:0045785 BP | GO:0045785  | positive regulation of cell adhesion            | 107/1414  | 484/18903 | 5.5294055167772e-25            | 8.11431889197655e-22         | 5.19980625396496e-22          | THY1/SOX4/DAB2/LGALS1/ACTB/TPM1/RIN2/FLNA/RUNX1/ZFH3/ABI3BP/GLI3/ANK  | 107   | 0.221074380165289 |
| GO:0045229 BP | GO:0045229  | external encapsulating structure                | 84/1414   | 321/18903 | 5.56442235006106e-25           | 8.11431889197655e-22         | 5.19980625396496e-22          | COL1A1/MMP2/COL1A2/TGFB                                               | 84    | 0.261682242990654 |
| GO:0042060 BP | GO:0042060  | wound healing                                   | 96/1414   | 442/18903 | 6.36854985381362e-22           | 7.42955025945897e-19         | 4.7609937959773e-19           | COL1A1/COL5A1/COL3A1/PDGFRA/AQP1/PDGFRB/MYL9/ACTG1/ACTB/TPM1/FLNA/FAP | 96    | 0.217194570135747 |
| GO:0022407 BP | GO:0022407  | regulation of cell-cell adhesion                | 101/1414  | 490/18903 | 3.14429352074782e-21           | 3.056777351087e-18           | 1.95883970038167e-18          | THY1/SOX4/GPNMB/LGALS1/ACTB/RUNX1/GLI3/ANK3/LAG3/PIEZO1/HES1/SPINT2/T | 101   | 0.206122448979592 |
| GO:0061448 BP | GO:0061448  | connective tissue ameboidal-type cell migration | 70/1414   | 274/18903 | 2.25100031010346e-20           | 1.87572640126193e-17         | 1.20200031596653e-17          | COL1A1/TGFB1/COL5A1/COL3A1/SERPINH1/EGR1/PDGFR                        | 70    | 0.255474452554745 |
| GO:0001667 BP | GO:0001667  | ameboidal-type cell migration                   | 99/1414   | 492/18903 | 4.82839187597348e-20           | 3.52050122656916e-17         | 2.25600257257656e-17          | GJA1/JUN/FOXP1/AQP1/TWIST1/FSTL1/SEMA3C/ZEB2/RIN2/FAP/PIK3R3/SMOC2/PL | 99    | 0.201219512195122 |
| GO:0007015 BP | GO:0007015  | actin filament organization                     | 94/1414   | 454/18903 | 5.74332290979281e-20           | 3.72231139253572e-17         | 2.38532627516658e-17          | CALD1/MARCKS/TPM4/CAPZB/ENAH/ITGB5/LIMA1/WIPF1/ACTG1/TPM1/FLNA/DPYSL3 | 94    | 0.20704845814978  |
| GO:0001503 BP | GO:0001503  | ossification                                    | 90/1414   | 429/18903 | 1.47233248856264e-19           | 8.58811540578589e-17         | 5.50342385987994e-17          | COL1A1/MMP2/COL1A2/TNC/CDH11/COL5A2/COL6A1/MRC2/TPM4/VCAN/ITGA11/TWIS | 90    | 0.20979020979021  |
| GO:0002504 BP | GO:0002504  | antigen response to transforming                | 24/1414   | 36/18903  | 4.081073809805419590310296e-19 | 2.1640821391501039189996e-16 | 1.38678402250881137297532e-16 | CTSF/CTSL/HLA-DRB1/HLA-COL1A1/COL1A2/COL3A1/LTBP2/JUN/MXRA5/ZFP36L1/L | 24    | 0.666666666666667 |
| GO:0071559 BP | GO:0071559  | response to transforming cartilage development  | 68/1414   | 277/18903 | 8.05419590310296e-19           | 3.91501039189996e-16         | 2.50881137297532e-16          | COL1A1/TGFB1/COL3A1/SERPINH1/ECM1/RSP02/PRRX1/                        | 68    | 0.245487364620939 |
| GO:0051216 BP | GO:0051216  | cartilage development                           | 56/1414   | 201/18903 | 2.02261649147203e-18           | 9.07532461135106e-16         | 5.8156365677872e-16           | COL1A1/TGFB1/COL3A1/SERPINH1/ECM1/RSP02/PRRX1/                        | 56    | 0.278606965174129 |

|               |            |                                    |         |           |                          |                        |                          |                                                                               |                      |
|---------------|------------|------------------------------------|---------|-----------|--------------------------|------------------------|--------------------------|-------------------------------------------------------------------------------|----------------------|
| GO:1901342 BP | GO:1901342 | regulation of vasculature          | 78/1414 | 355/18903 | 2.496433591<br>01009e-18 | 1.0401212<br>2402585e- | 6.66528998<br>622319e-16 | THBS2/AQP1/TWIST1/ECM1/<br>GPNMB/RUNX1/SMOC2/CCN6/                            | 78 0.219718309859155 |
| GO:0060326 BP | GO:0060326 | cell chemotaxis                    | 73/1414 | 319/18903 | 2.878473911<br>04487e-18 | 1.1193425<br>5487498e- | 7.17295498<br>815463e-16 | MMP2/NBL1/PDGFRB/PDGFRB<br>/SMOC2/PTN/NR4A1/TRPV4/                            | 73 0.22884012539185  |
| GO:0002181 BP | GO:0002181 | cytoplasmic translation            | 49/1414 | 161/18903 | 5.024848146<br>45391e-18 | 1.8318712<br>023916e-  | 1.17389709<br>00038e-15  | RPS26/RPL22L1/RPS21/RPS<br>15A/RPL39/RPS3/RPL36/RP                            | 49 0.304347826086957 |
| GO:0032103 BP | GO:0032103 | positive regulation of response to | 91/1414 | 464/18903 | 9.423303509<br>01514e-18 | 3.2333017<br>2753443e- | 2.07195979<br>941255e-15 | CADM1/PDGFRB/LGALS1/FLN<br>A/HEXIM1/SMOC2/NEAT1/LA<br>G3/PLCG2/PTN/PLA2G2A/NF | 91 0.196120689655172 |
| GO:0045765 BP | GO:0045765 | regulation of angiogenesis         | 76/1414 | 349/18903 | 1.173628463<br>77559e-17 | 3.8032082<br>3844613e- | 2.43716647<br>653048e-15 | THBS2/AQP1/TWIST1/ECM1/<br>GPNMB/RUNX1/SMOC2/CCN6/                            | 76 0.217765042979943 |
| GO:0022409 BP | GO:0022409 | positive regulation of             | 72/1414 | 322/18903 | 1.890474627<br>62894e-17 | 5.8037571<br>0682084e- | 3.71915534<br>776197e-15 | THY1/SOX4/LGALS1/ACTB/R<br>UNX1/GLI3/ANK3/PIEZO1/H                            | 72 0.22360248447205  |
| GO:0050900 BP | GO:0050900 | leukocyte migration                | 82/1414 | 398/18903 | 1.994135817<br>19957e-17 | 5.8158971<br>1086255e- | 3.72693488<br>782931e-15 | MMP2/NBL1/THY1/ECM1/CD9<br>9/PTN/APOD/TRPV4/SAA1/V                            | 82 0.206030150753769 |
| GO:0002495 BP | GO:0002495 | antigen                            | 22/1414 | 34/18903  | 3.298846210              | 9.1629380              | 5.87178089               | CTSF/CTSL/HLA-DRB1/HLA-                                                       | 22 0.647058823529412 |
| GO:0003158 BP | GO:0003158 | endothelium                        | 44/1414 | 139/18903 | 4.826294179              | 1.2796260              | 8.20008164               | FOXP1/FSTL1/RBPJ/SLC40A                                                       | 44 0.316546762589928 |
| GO:0010631 BP | GO:0010631 | epithelial cell                    | 77/1414 | 366/18903 | 5.664368256<br>19543e-17 | 1.4365330<br>451473e-  | 9.20557056<br>189931e-15 | JUN/FOXP1/FSTL1/ZEB2/RI<br>N2/FAP/PIK3R3/SMOC2/PLC                            | 77 0.210382513661202 |
| GO:0071560 BP | GO:0071560 | cellular response to               | 64/1414 | 271/18903 | 6.885033884<br>11562e-17 | 1.6316589<br>9060173e- | 1.04559738<br>612915e-14 | COL1A1/COL1A2/COL3A1/LT<br>BP2/JUN/ZFP36L1/LTBP1/F                            | 64 0.236162361623616 |
| GO:0007159 BP | GO:0007159 | leukocyte cell-cell                | 83/1414 | 414/18903 | 6.993223858<br>2279e-17  | 1.6316589<br>9060173e- | 1.04559738<br>612915e-14 | THY1/SOX4/GPNMB/LGALS1/<br>ACTB/RUNX1/GLI3/NT5E/LA                            | 83 0.20048309178744  |
| GO:1902903 BP | GO:1902903 | regulation of supramolecula        | 79/1414 | 384/18903 | 8.548729794<br>83092e-17 | 1.9178746<br>4974034e- | 1.22900969<br>641476e-14 | AEBP1/CAPZB/LIMA1/ACTG1<br>/TPM1/FLNA/TNXB/HSPA1A/                            | 79 0.205729166666667 |
| GO:0090132 BP | GO:0090132 | epithelium migration               | 77/1414 | 369/18903 | 9.189798525<br>83942e-17 | 1.9853368<br>4448968e- | 1.27224072<br>379165e-14 | JUN/FOXP1/FSTL1/ZEB2/RI<br>N2/FAP/PIK3R3/SMOC2/PLC                            | 77 0.208672086720867 |
| GO:0052547 BP | GO:0052547 | regulation of peptidase activity   | 88/1414 | 459/18903 | 1.436670994<br>36603e-16 | 2.9928935<br>3933467e- | 1.91790176<br>72909e-14  | COL6A3/SERPINH1/PCOLCE/<br>AQP1/ANTXR1/ECM1/TIMP2/<br>ANOS1/TIMP4/PCSK1N/NR4A | 88 0.191721132897603 |
| GO:0090130 BP | GO:0090130 | tissue migration                   | 77/1414 | 374/18903 | 2.029463628<br>89725e-16 | 4.0820211<br>5426127e- | 2.61583497<br>140259e-14 | JUN/FOXP1/FSTL1/ZEB2/RI<br>N2/FAP/PIK3R3/SMOC2/PLC                            | 77 0.205882352941176 |
| GO:0019886 BP | GO:0019886 | antigen                            | 20/1414 | 30/18903  | 3.850018685              | 7.4857196              | 4.79698819               | CTSF/CTSL/HLA-DRB1/HLA-                                                       | 20 0.666666666666667 |
| GO:0032956 BP | GO:0032956 | regulation of actin                | 75/1414 | 365/18903 | 5.628169077<br>05693e-16 | 1.0590035<br>5569268e- | 6.78629147<br>457696e-14 | PDGFRA/PDGFRB/CAPZB/LIM<br>A1/ACTG1/TPM1/FLNA/NOTC                            | 75 0.205479452054795 |

|               |            |                                     |         |           |                          |                          |                          |                                                                               |    |                    |
|---------------|------------|-------------------------------------|---------|-----------|--------------------------|--------------------------|--------------------------|-------------------------------------------------------------------------------|----|--------------------|
| GO:0007178 BP | GO:0007178 | transmembrane receptor              | 78/1414 | 390/18903 | 7.085363417<br>3776e-16  | 1.2771929<br>2030789e-   | 8.18448944<br>754134e-14 | COL1A2/NBL1/COL3A1/LTBP<br>2/JUN/EGR1/LTBP1/FOS/DK                            | 78 | 0.2                |
| GO:0032970 BP | GO:0032970 | regulation of actin                 | 80/1414 | 406/18903 | 7.225675702<br>06762e-16 | 1.2771929<br>2030789e-   | 8.18448944<br>754134e-14 | PDGFRA/PDGFRB/CAPZB/FRM<br>D6/LIMA1/ACTG1/TPM1/FLN                            | 80 | 0.197044334975369  |
| GO:0001819 BP | GO:0001819 | positive regulation of cytokine     | 89/1414 | 486/18903 | 1.773764945<br>37256e-15 | 3.0430502<br>7245828e-13 | 1.95004313<br>344209e-13 | CADM1/EGR1/FOXP1/TWIST1<br>/RUNX1/LUM/CHI3L1/H19/S                            | 89 | 0.183127572016461  |
| GO:0070482 BP | GO:0070482 | response to oxygen levels           | 70/1414 | 337/18903 | 3.024526326<br>47545e-15 | 5.0405891<br>6066609e-   | 3.23010315<br>3478e-13   | COL1A1/MMP2/EGR1/ZFP36L<br>1/AQP1/FOS/PDGFRB/TWIST                            | 70 | 0.207715133531157  |
| GO:0002478 BP | GO:0002478 | antigen                             | 22/1414 | 40/18903  | 4.401136042              | 7.1310629                | 4.56971756               | CTSF/CTSL/HLA-DRB1/HLA-                                                       | 22 | 0.55               |
| GO:0019882 BP | GO:0019882 | antigen                             | 36/1414 | 108/18903 | 5.506130132              | 8.6803397                | 5.56252293               | CTSF/ICAM1/CTSL/HLA-                                                          | 36 | 0.3333333333333333 |
| GO:0002274 BP | GO:0002274 | myeloid leukocyte                   | 56/1414 | 237/18903 | 5.927140575<br>22071e-15 | 9.0981607<br>829638e-    | 5.83027041<br>069495e-13 | JUN/FOXP1/RBPJ/NOTCH2/M<br>T1G/S100A13/PLCG2/PLA2G                            | 56 | 0.236286919831224  |
| GO:0043542 BP | GO:0043542 | endothelial cell                    | 62/1414 | 281/18903 | 6.423841689<br>4e-15     | 9.6077611<br>7288979e-   | 6.15683180<br>541414e-13 | FOXP1/FSTL1/RIN2/FAP/PI<br>K3R3/SMOC2/PTN/NR4A1/SP                            | 62 | 0.220640569395018  |
| GO:0045446 BP | GO:0045446 | endothelial                         | 38/1414 | 121/18903 | 8.788557995              | 1.2815914                | 8.21267616               | FSTL1/RBPJ/ZEB1/COL15A1                                                       | 38 | 0.31404958677686   |
| GO:0070371 BP | GO:0070371 | ERK1 and ERK2 cascade               | 69/1414 | 340/18903 | 1.617758575<br>69982e-14 | 2.3015575<br>0537977e-   | 1.47488079<br>648526e-12 | JUN/PDGFRB/ZFP36L1/PDGF<br>RB/DAB2/GPNMB/NOTCH2/CH                            | 69 | 0.202941176470588  |
| GO:0008360 BP | GO:0008360 | regulation of                       | 43/1414 | 154/18903 | 1.690065354              | 2.3471788                | 1.50411580               | TPM1/PALMD/PDPN/FN1/RHO                                                       | 43 | 0.279220779220779  |
| GO:0050920 BP | GO:0050920 | regulation of chemotaxis            | 54/1414 | 230/18903 | 2.410250099<br>67383e-14 | 3.2695322<br>863715e-    | 2.09517701<br>442883e-12 | NBL1/PDGFRB/PDGFRB/SEMA<br>3C/SMOC2/PTN/TRPV4/TUBB                            | 54 | 0.234782608695652  |
| GO:1903037 BP | GO:1903037 | regulation of leukocyte             | 73/1414 | 377/18903 | 3.508510174<br>99305e-14 | 4.5653261<br>9105405e-   | 2.92554581<br>544803e-12 | THY1/SOX4/GPNMB/LGALS1/<br>ACTB/RUNX1/GLI3/LAG3/HE                            | 73 | 0.193633952254642  |
| GO:0031589 BP | GO:0031589 | cell-substrate                      | 72/1414 | 369/18903 | 3.522024320<br>20285e-14 | 4.5653261<br>9105405e-   | 2.92554581<br>544803e-12 | COL1A1/COL3A1/THY1/ANTX<br>R1/ITGA11/ITGB5/DAB2/AC                            | 72 | 0.195121951219512  |
| GO:0030595 BP | GO:0030595 | leukocyte chemotaxis                | 55/1414 | 240/18903 | 4.112543149<br>44794e-14 | 5.1636961<br>9895903e-   | 3.30899243<br>009438e-12 | MMP2/NBL1/PTN/TRPV4/SAA<br>1/PDE4B/ANXA1/CCL20/VEG                            | 55 | 0.2291666666666667 |
| GO:0070372 BP | GO:0070372 | regulation of ERK1 and ERK2         | 65/1414 | 315/18903 | 4.160701548<br>96407e-14 | 5.1636961<br>9895903e-   | 3.30899243<br>009438e-12 | JUN/PDGFRB/PDGFRB/DAB2/<br>GPNMB/NOTCH2/CHI3L1/PLA                            | 65 | 0.206349206349206  |
| GO:0052548 BP | GO:0052548 | regulation of endopeptidase         | 79/1414 | 428/18903 | 4.593179136<br>13649e-14 | 5.5816695<br>6272587e-   | 3.57683752<br>465366e-12 | COL6A3/SERPINH1/AQP1/TI<br>MP2/ANOS1/TIMP4/PCSK1N/                            | 79 | 0.184579439252336  |
| GO:0043410 BP | GO:0043410 | positive regulation of MAPK cascade | 87/1414 | 496/18903 | 4.963645698<br>21256e-14 | 5.8356311<br>3800083e-12 | 3.73958081<br>89414e-12  | JUN/IGFBP4/PDGFRB/PDGFR<br>B/GPNMB/NOTCH2/CDON/CHI<br>3L1/MAP2K6/GADD45B/PLCG | 87 | 0.175403225806452  |
| GO:0110053 BP | GO:0110053 | regulation of actin                 | 60/1414 | 278/18903 | 5.002255390<br>023e-14   | 5.8356311<br>3800083e-   | 3.73958081<br>89414e-12  | CAPZB/LIMA1/ACTG1/TPM1/<br>FLNA/SCIN/GSN/PIK3R1/RH                            | 60 | 0.215827338129496  |

|               |            |                                      |         |           |                            |                        |                          |                                                                               |                      |
|---------------|------------|--------------------------------------|---------|-----------|----------------------------|------------------------|--------------------------|-------------------------------------------------------------------------------|----------------------|
| GO:0036293 BP | GO:0036293 | response to decreased                | 64/1414 | 309/18903 | 5.458019944<br>14498e-14   | 6.2175052<br>5867698e- | 3.98429284<br>805362e-12 | MMP2/EGR1/ZFP36L1/AQP1/<br>FOS/TWIST1/LMNA/RBPJ/CR                            | 64 0.207119741100324 |
| GO:0071674 BP | GO:0071674 | mononuclear cell                     | 50/1414 | 206/18903 | 5.542778560<br>79552e-14   | 6.2175052<br>5867698e- | 3.98429284<br>805362e-12 | NBL1/ECM1/CD99/APOD/TRP<br>V4/SAA1/SELENOK/ICAM1/A                            | 50 0.242718446601942 |
| GO:0050678 BP | GO:0050678 | regulation of epithelial             | 77/1414 | 414/18903 | 6.403892382<br>86983e-14   | 7.0479064<br>6590183e- | 4.51642936<br>476082e-12 | JUN/ZFP36L1/TWIST1/DAB2<br>/ECM1/SIX1/RBPJ/ZEB1/NO                            | 77 0.185990338164251 |
| GO:0045766 BP | GO:0045766 | positive regulation of               | 47/1414 | 187/18903 | 7.887695567<br>69932e-14   | 8.3652596<br>8116184e- | 5.36061377<br>242111e-12 | AQP1/TWIST1/ECM1/RUNX1/<br>SMOC2/CHI3L1/S100A1/ANG                            | 47 0.251336898395722 |
| GO:1904018 BP | GO:1904018 | positive regulation of               | 47/1414 | 187/18903 | 7.887695567<br>69932e-14   | 8.3652596<br>8116184e- | 5.36061377<br>242111e-12 | AQP1/TWIST1/ECM1/RUNX1/<br>SMOC2/CHI3L1/S100A1/ANG                            | 47 0.251336898395722 |
| GO:0050870 BP | GO:0050870 | positive regulation of               | 56/1414 | 251/18903 | 8.067320923<br>80245e-14   | 8.4029790<br>9795351e- | 5.38478507<br>526739e-12 | THY1/SOX4/LGALS1/ACTB/R<br>UNX1/GLI3/HES1/ZBTB16/V                            | 56 0.223107569721116 |
| GO:0019884 BP | GO:0019884 | antigen                              | 23/1414 | 49/18903  | 9.288658372<br>9.761857164 | 9.5053937<br>9.8173987 | 6.09123284<br>6.29117146 | CTSF/CTSL/HLA-DRB1/HLA-<br>JUN/PDGFRB/PDGFRB/GPNMB                            | 23 0.469387755102041 |
| GO:0070374 BP | GO:0070374 | positive regulation of               | 52/1414 | 223/18903 | 9.761857164<br>61432e-14   | 9.8173987<br>6572334e- | 6.29117146<br>852005e-12 | JUN/PDGFRB/PDGFRB/GPNMB<br>/NOTCH2/CHI3L1/PLA2G2A/                            | 52 0.233183856502242 |
| GO:1903039 BP | GO:1903039 | positive regulation of               | 59/1414 | 275/18903 | 1.071219897<br>32712e-13   | 1.0590551<br>9679815e- | 6.78662240<br>037216e-12 | THY1/SOX4/LGALS1/ACTB/R<br>UNX1/GLI3/HES1/ZBTB16/V                            | 59 0.214545454545455 |
| GO:0048002 BP | GO:0048002 | antigen                              | 26/1414 | 64/18903  | 1.576439711<br>1.645981436 | 1.5325621<br>1.5732658 | 9.82094283<br>1.00817800 | CTSF/CTSL/HLA-DRB1/HLA-<br>COL1A1/GJA1/COL3A1/SERP                            | 26 0.40625           |
| GO:0060348 BP | GO:0060348 | bone development                     | 53/1414 | 233/18903 | 1.645981436<br>19588e-13   | 1.5732658<br>9323427e- | 1.00817800<br>479575e-11 | INH1/FOXP1/TWIST1/ECM1/<br>PDGFRB/SMOC2/PTN/TRPV4/                            | 53 0.227467811158798 |
| GO:0050921 BP | GO:0050921 | positive epithelial cell             | 40/1414 | 144/18903 | 1.672252449<br>1.763800516 | 1.5732658<br>1.6330553 | 1.00817800<br>1.04649216 | PDGFRB/SMOC2/PTN/TRPV4/<br>JUN/IGFBP4/ZFP36L1/TWIS                            | 40 0.277777777777778 |
| GO:0050673 BP | GO:0050673 | cell                                 | 84/1414 | 481/18903 | 1.763800516<br>77073e-13   | 1.6330553<br>038609e-  | 1.04649216<br>959947e-11 | JUN/IGFBP4/ZFP36L1/TWIS<br>T1/DAB2/ECM1/SIX1/RBPJ/                            | 84 0.174636174636175 |
| GO:0061572 BP | GO:0061572 | actin                                | 43/1414 | 164/18903 | 1.873816662<br>2.132081274 | 1.7078082<br>1.9132969 | 1.09439522<br>1.22607621 | CALD1/MARCKS/ITGB5/LIMA<br>TGFB1/COL3A1/SERPINH1/E                            | 43 0.26219512195122  |
| GO:0002062 BP | GO:0002062 | chondrocyte                          | 35/1414 | 114/18903 | 2.132081274<br>2.231387192 | 1.9132969<br>1.9692838 | 1.22607621<br>1.26195367 | TGFB1/COL3A1/SERPINH1/E<br>MAFB/JUN/FOXP1/ZFP36L1/                            | 35 0.307017543859649 |
| GO:0030099 BP | GO:0030099 | myeloid cell differentiation         | 75/1414 | 407/18903 | 2.231387192<br>7086e-13    | 1.9692838<br>6673734e- | 1.26195367<br>749453e-11 | MAFB/JUN/FOXP1/ZFP36L1/<br>FOS/RBPJ/FLNA/KLF10/FBN                            | 75 0.184275184275184 |
| GO:0002683 BP | GO:0002683 | negative regulation of immune system | 80/1414 | 449/18903 | 2.261992440<br>79208e-13   | 1.9692838<br>6673734e- | 1.26195367<br>749453e-11 | MAFB/NBL1/COL3A1/THY1/T<br>WIST1/GPNMB/FBN1/RUNX1/<br>GLI3/PSMB4/LAG3/APOD/NR | 80 0.178173719376392 |
| GO:0050867 BP | GO:0050867 | positive regulation of cell          | 82/1414 | 467/18903 | 2.551529764<br>91656e-13   | 2.1886872<br>2334681e- | 1.40255142<br>340847e-11 | THY1/PDGFRB/SOX4/LGALS1<br>/ACTB/FLNA/RUNX1/GLI3/H<br>ES1/ZBTB16/VCAM1/CDKN1A | 82 0.17558886509636  |
| GO:0001666 BP | GO:0001666 | response to hypoxia                  | 61/1414 | 296/18903 | 2.703753650<br>42947e-13   | 2.2856514<br>5550074e- | 1.46468790<br>429825e-11 | MMP2/EGR1/ZFP36L1/AQP1/<br>FOS/TWIST1/LMNA/RBPJ/CR                            | 61 0.206081081081081 |

|               |            |                            |         |           |                          |                        |                          |                                                    |                      |
|---------------|------------|----------------------------|---------|-----------|--------------------------|------------------------|--------------------------|----------------------------------------------------|----------------------|
| GO:0002685 BP | GO:0002685 | regulation of leukocyte    | 52/1414 | 231/18903 | 4.316129778<br>82307e-13 | 3.5965692<br>8569643e- | 2.30474839<br>768432e-11 | NBL1/THY1/ECM1/CD99/PTN<br>/APOD/TRPV4/PIK3R1/SELE | 52 0.225108225108225 |
| GO:0010632 BP | GO:0010632 | regulation of epithelial   | 60/1414 | 292/18903 | 4.850655648<br>70143e-13 | 3.9850527<br>3223598e- | 2.55369580<br>556542e-11 | JUN/FOXP1/RIN2/SMOC2/PL<br>CG2/PTN/SPARC/FGFR1/NRP | 60 0.205479452054795 |
| GO:0007596 BP | GO:0007596 | blood coagulation          | 51/1414 | 225/18903 | 5.464510457<br>21069e-13 | 4.4270124<br>3012638e- | 2.83691178<br>853145e-11 | COL3A1/PDGFRA/MYL9/ACTG<br>1/ACTB/FLNA/FAP/PROCR/C | 51 0.226666666666667 |
| GO:0050863 BP | GO:0050863 | regulation of T cell       | 70/1414 | 376/18903 | 8.608230275<br>06689e-13 | 6.8783297<br>5266647e- | 4.40776145<br>735581e-11 | THY1/SOX4/GPNMB/LGALS1/<br>ACTB/RUNX1/ZEB1/GLI3/LA | 70 0.186170212765957 |
| GO:0022604 BP | GO:0022604 | regulation of cell         | 62/1414 | 312/18903 | 9.368123377<br>846e-13   | 7.3843599<br>5445618e- | 4.73203500<br>920784e-11 | CAPZB/DAB2/PTPRD/TPM1/F<br>LNA/PALMD/SPARC/MELTF/P | 62 0.198717948717949 |
| GO:0003007 BP | GO:0003007 | heart morphogenesis        | 55/1414 | 258/18903 | 9.672368720<br>30977e-13 | 7.5225235<br>6607559e- | 4.82057281<br>765895e-11 | COL5A1/JUN/TWIST1/SOX4/<br>SEMA3C/SIX1/RBPJ/TPM1/F | 55 0.213178294573643 |
| GO:0050817 BP | GO:0050817 | coagulation                | 51/1414 | 230/18903 | 1.340486852<br>56861e-12 | 1.0288236<br>5934641e- | 6.59289309<br>345034e-11 | COL3A1/PDGFRA/MYL9/ACTG<br>1/ACTB/FLNA/FAP/PROCR/C | 51 0.221739130434783 |
| GO:1903706 BP | GO:1903706 | regulation of hemopoiesis  | 74/1414 | 413/18903 | 1.375397378<br>42178e-12 | 1.0419081<br>6991354e- | 6.67674106<br>736262e-11 | MAFB/FOXP1/ZFP36L1/FOS/<br>SOX4/ACTB/KLF10/FBN1/RU | 74 0.179176755447942 |
| GO:0007179 BP | GO:0007179 | transforming growth factor | 49/1414 | 216/18903 | 1.509515009<br>47078e-12 | 1.1288462<br>884927e-  | 7.23385667<br>83141e-11  | COL1A2/COL3A1/LTBP2/JUN<br>/LTBP1/FOS/DKK3/ITGB5/D | 49 0.226851851851852 |
| GO:0051017 BP | GO:0051017 | actin                      | 41/1414 | 160/18903 | 1.543009477              | 1.1392878              | 7.30076836               | CALD1/MARCKS/ITGB5/LIMA                            | 41 0.25625           |
| GO:0007599 BP | GO:0007599 | hemostasis                 | 51/1414 | 231/18903 | 1.598001117<br>06309e-12 | 1.1651425<br>6447862e- | 7.46644995<br>61724e-11  | COL3A1/PDGFRA/MYL9/ACTG<br>1/ACTB/FLNA/FAP/PROCR/C | 51 0.220779220779221 |
| GO:0001649 BP | GO:0001649 | osteoblast differentiat    | 53/1414 | 246/18903 | 1.619415692<br>39501e-12 | 1.1661792<br>2638766e- | 7.47309307<br>82257e-11  | COL1A1/TNC/COL6A1/MRC2/<br>TPM4/VCAN/ITGA11/TWIST1 | 53 0.215447154471545 |
| GO:0034612 BP | GO:0034612 | response to tumor          | 54/1414 | 254/18903 | 1.745483314<br>35908e-12 | 1.2416346<br>5520202e- | 7.95662548<br>047382e-11 | COL1A1/FOXP1/ZFP36L1/FO<br>S/CTSK/CHI3L1/HSPA1A/HE | 54 0.21259842519685  |
| GO:0050878 BP | GO:0050878 | regulation of body fluid   | 71/1414 | 390/18903 | 1.803190432<br>24194e-12 | 1.2672300<br>953334e-  | 8.12064581<br>470021e-11 | COL3A1/PDGFRA/AQP1/MYL9<br>/ACTG1/ACTB/FLNA/FAP/CD | 71 0.182051282051282 |
| GO:0002696 BP | GO:0002696 | positive regulation of     | 78/1414 | 450/18903 | 1.957217700<br>26167e-12 | 1.3591012<br>9114599e- | 8.70937350<br>078845e-11 | THY1/SOX4/LGALS1/ACTB/R<br>UNX1/GLI3/HES1/ZBTB16/V | 78 0.173333333333333 |
| GO:0010634 BP | GO:0010634 | positive                   | 43/1414 | 176/18903 | 2.535233546              | 1.7397667              | 1.11487483               | JUN/FOXP1/RIN2/SMOC2/PL                            | 43 0.244318181818182 |
| GO:0097529 BP | GO:0097529 | myeloid leukocyte          | 52/1414 | 242/18903 | 2.927078170<br>23066e-12 | 1.9853077<br>8685528e- | 1.27222210<br>311984e-10 | MMP2/NBL1/CD99/TRPV4/SA<br>A1/PIK3R1/SELENOK/PDE4B | 52 0.214876033057851 |
| GO:0007162 BP | GO:0007162 | negative regulation of     | 60/1414 | 308/18903 | 5.267992884<br>83588e-12 | 3.5319772<br>9853422e- | 2.26335665<br>26379e-10  | COL1A1/MMP2/TGFBI/GPNMB<br>/RUNX1/GLI3/LAG3/MELTF/ | 60 0.194805194805195 |
| GO:2001233 BP | GO:2001233 | regulation of apoptotic    | 68/1414 | 374/18903 | 5.677054124<br>42362e-12 | 3.7629837<br>1679124e- | 2.41138985<br>596032e-10 | LMNA/HSPA1A/COL2A1/UBB/<br>HSPA1B/SNAI1/DDIT3/DNAJ | 68 0.181818181818182 |

|               |            |                                 |         |           |                          |                        |                          |                                                 |                      |
|---------------|------------|---------------------------------|---------|-----------|--------------------------|------------------------|--------------------------|-------------------------------------------------|----------------------|
| GO:1902105 BP | GO:1902105 | regulation of leukocyte myeloid | 61/1414 | 317/18903 | 6.038160875<br>2092e-12  | 3.9573699<br>3090958e- | 2.53595615<br>232027e-10 | MAFB/FOXP1/ZFP36L1/FOS/SOX4/ACTB/KLF10/FBN1/RUN | 61 0.192429022082019 |
| GO:0002573 BP | GO:0002573 | leukocyte                       | 48/1414 | 218/18903 | 8.008425128<br>72427e-12 | 5.1903493<br>0842763e- | 3.32607223<br>76725e-10  | MAFB/JUN/FOXP1/ZFP36L1/FOS/RBPJ/KLF10/FBN1/RUN  | 48 0.220183486238532 |
| GO:0030199 BP | GO:0030199 | collagen                        | 24/1414 | 64/18903  | 1.054064444              | 6.7564372              | 4.32965048               | COL1A1/COL1A2/COL14A1/C                         | 24 0.375             |
| GO:0048545 BP | GO:0048545 | response to steroid             | 63/1414 | 339/18903 | 1.307289366<br>01162e-11 | 8.2884987<br>7385408e- | 5.31142395<br>733095e-10 | COL1A1/FOSB/FOXP1/ZFP36L1/AQP1/FOS/DAB2/LBH/CD  | 63 0.185840707964602 |
| GO:0010594 BP | GO:0010594 | regulation of endothelial       | 49/1414 | 230/18903 | 1.721482644<br>90341e-11 | 1.0797213<br>1910985e- | 6.91905475<br>048332e-10 | FOXP1/RIN2/SMOC2/PTN/SPARC/FGFR1/NRP2/ETS1/FGF  | 49 0.21304347826087  |
| GO:0048659 BP | GO:0048659 | smooth muscle                   | 42/1414 | 179/18903 | 1.867920639              | 1.1591043              | 7.42775609               | MMP2/GJA1/JUN/FOXP1/PDG                         | 42 0.23463687150838  |
| GO:0032535 BP | GO:0032535 | regulation of cellular          | 66/1414 | 367/18903 | 1.928950334<br>06059e-11 | 1.1843755<br>051132e-  | 7.58969821<br>191042e-10 | AQP1/CAPZB/SEMA3C/LIMA1/NTN1/SCIN/GSN/TRPV4/SP  | 66 0.17983651226158  |
| GO:0043254 BP | GO:0043254 | regulation of protein-          | 71/1414 | 410/18903 | 2.048871325<br>67151e-11 | 1.2449027<br>5444187e- | 7.97756806<br>738983e-10 | CAPZB/PIEZO1/PLCG2/HSPA1A/HES1/HSPA1B/HSPA8/CR  | 71 0.173170731707317 |
| GO:0033002 BP | GO:0033002 | muscle cell proliferation       | 51/1414 | 247/18903 | 2.269219964<br>01814e-11 | 1.3645732<br>0104307e- | 8.74443851<br>57118e-10  | MMP2/GJA1/JUN/FOXP1/FOS/PDGFRB/SIX1/RBPJ/TPM1/  | 51 0.206477732793522 |
| GO:0045861 BP | GO:0045861 | negative regulation of          | 64/1414 | 352/18903 | 2.400895919<br>23495e-11 | 1.4290230<br>5070382e- | 9.15744512<br>266735e-10 | COL6A3/SERPINH1/AQP1/ECM1/TIMP2/GAS1/ANOS1/TIM  | 64 0.181818181818182 |
| GO:0010466 BP | GO:0010466 | negative regulation of          | 53/1414 | 263/18903 | 2.431852125<br>80021e-11 | 1.4328276<br>2119117e- | 9.18182551<br>697666e-10 | COL6A3/SERPINH1/AQP1/ECM1/TIMP2/ANOS1/TIMP4/PC  | 53 0.201520912547529 |
| GO:1903131 BP | GO:1903131 | mononuclear cell                | 78/1414 | 473/18903 | 2.534502620<br>2835e-11  | 1.4783753<br>7841136e- | 9.47370400<br>48702e-10  | MAFB/JUN/EGR1/FOXP1/ZFP36L1/FOS/SOX4/KLF6/LGAL  | 78 0.164904862579281 |
| GO:0150115 BP | GO:0150115 | cell-                           | 30/1414 | 101/18903 | 2.801394136              | 1.6178744              | 1.03676399               | THY1/ACTG1/ACTN1/APOD/F                         | 30 0.297029702970297 |
| GO:0050727 BP | GO:0050727 | regulation of inflammatory      | 71/1414 | 414/18903 | 3.248196209<br>62122e-11 | 1.8575224<br>0105104e- | 1.19033485<br>452683e-09 | TNC/SOCS3/FOXP1/LGALS1/PSMB4/NT5E/NEAT1/PLCG2/  | 71 0.171497584541063 |
| GO:0048660 BP | GO:0048660 | regulation of                   | 41/1414 | 175/18903 | 3.409144797              | 1.9306351              | 1.23718683               | MMP2/GJA1/JUN/FOXP1/PDG                         | 41 0.234285714285714 |
| GO:0002687 BP | GO:0002687 | positive                        | 37/1414 | 148/18903 | 4.120406708              | 2.3109934              | 1.48092755               | THY1/CD99/PTN/TRPV4/PIK                         | 37 0.25              |
| GO:0051251 BP | GO:0051251 | positive regulation of          | 69/1414 | 400/18903 | 4.720627845<br>45414e-11 | 2.6224211<br>6405086e- | 1.68049618<br>839175e-09 | THY1/SOX4/LGALS1/ACTB/RUNX1/GLI3/HES1/ZBTB16/V  | 69 0.1725            |
| GO:0010951 BP | GO:0010951 | negative regulation of          | 51/1414 | 252/18903 | 4.911449960<br>48069e-11 | 2.7026875<br>1127206e- | 1.73193235<br>448529e-09 | COL6A3/SERPINH1/AQP1/TIMP2/ANOS1/TIMP4/PCSK1N/  | 51 0.202380952380952 |
| GO:0001655 BP | GO:0001655 | urogenital system               | 64/1414 | 360/18903 | 6.482183848<br>20992e-11 | 3.5336989<br>1463631e- | 2.26445989<br>621185e-09 | MMP2/TNC/EGR1/PDGFRB/AQP1/PDGFRB/SOX4/SIX1/FBN  | 64 0.177777777777777 |
| GO:0034329 BP | GO:0034329 | cell junction assembly          | 72/1414 | 430/18903 | 7.338188646<br>84227e-11 | 3.9633013<br>3120657e- | 2.53975710<br>379502e-09 | THBS2/CDH11/GJA1/THY1/PTPRD/SIX1/ACTG1/ACTB/AC  | 72 0.167441860465116 |
| GO:0001570 BP | GO:0001570 | vasculogenesis                  | 26/1414 | 81/18903  | 8.548365096              | 4.5745517              | 2.93145769               | ZFP36L1/PDGFRB/RIN2/JUN                         | 26 0.320987654320988 |

|               |            |                             |         |           |                           |                         |                           |                                                    |                       |
|---------------|------------|-----------------------------|---------|-----------|---------------------------|-------------------------|---------------------------|----------------------------------------------------|-----------------------|
| GO:0045926 BP | GO:0045926 | negative regulation of      | 50/1414 | 249/18903 | 1. 017876226<br>46283e-10 | 5. 3975200<br>2632518e- | 3. 45883108<br>150193e-09 | GJA1/FOXP1/SEMA3C/DAB2/<br>FHL1/NTN1/MT1G/HSPA1A/M | 50 0. 200803212851406 |
| GO:0051346 BP | GO:0051346 | negative regulation of      | 65/1414 | 373/18903 | 1. 109321159<br>95282e-10 | 5. 8033444<br>7296778e- | 3. 71889092<br>432504e-09 | COL6A3/SERPINH1/AQP1/EC<br>M1/TIMP2/ANOS1/TIMP4/PC | 65 0. 17426273458445  |
| GO:0071356 BP | GO:0071356 | cellular response to        | 48/1414 | 234/18903 | 1. 114305813<br>42772e-10 | 5. 8033444<br>7296778e- | 3. 71889092<br>432504e-09 | COL1A1/FOXP1/ZFP36L1/FO<br>S/CTSK/CHI3L1/HSPA1A/HE | 48 0. 205128205128205 |
| GO:0007229 BP | GO:0007229 | integrin-                   | 31/1414 | 113/18903 | 1. 247630942              | 6. 4402046              | 4. 12700277               | COL3A1/THY1/ITGA11/ITGB                            | 31 0. 274336283185841 |
| GO:0045444 BP | GO:0045444 | fat cell differentiat       | 49/1414 | 244/18903 | 1. 559783403<br>73655e-10 | 7. 9197798<br>3799907e- | 5. 07514201<br>498456e-09 | MAFB/PDGFR/ACTG1/SIX<br>1/TBL1XR1/ID4/DIO2/RETR    | 49 0. 200819672131148 |
| GO:0034109 BP | GO:0034109 | homotypic                   | 28/1414 | 95/18903  | 1. 561417249              | 7. 9197798              | 5. 07514201               | PDGFRA/MYL9/ACTG1/CD99/                            | 28 0. 294736842105263 |
| GO:0010038 BP | GO:0010038 | response to metal ion       | 63/1414 | 360/18903 | 1. 796761822<br>52334e-10 | 9. 0349238<br>886023e-  | 5. 78974703<br>428348e-09 | JUN/FOSB/AQP1/FOS/ACTG1<br>/SLC40A1/FIBIN/CRIP1/AN | 63 0. 175             |
| GO:0072001 BP | GO:0072001 | renal system development    | 58/1414 | 318/18903 | 1. 829890418<br>01148e-10 | 9. 1228639<br>3868458e- | 5. 84610065<br>169479e-09 | EGR1/PDGFR/ACTG1/PDGFRB<br>/SOX4/SIX1/FBN1/NOTCH2/ | 58 0. 182389937106918 |
| GO:0007160 BP | GO:0007160 | cell-matrix adhesion        | 48/1414 | 238/18903 | 2. 056035808<br>41399e-10 | 1. 0163438<br>0258295e- | 6. 51291985<br>341487e-09 | COL3A1/THY1/ITGA11/ITGB<br>5/ACTG1/RIN2/ACTN1/TNXB | 48 0. 201680672268908 |
| GO:0042116 BP | GO:0042116 | macrophage                  | 30/1414 | 109/18903 | 2. 268471644              | 1. 1119323              | 7. 12546909               | JUN/FOXP1/PLCG2/NR1D1/J                            | 30 0. 275229357798165 |
| GO:0090287 BP | GO:0090287 | regulation of cellular      | 60/1414 | 338/18903 | 2. 729481124<br>23429e-10 | 1. 3267552<br>8313822e- | 8. 50209427<br>382101e-09 | NBL1/LTBP1/DKK3/FSTL1/D<br>AB2/ZEB2/RBPJ/FBN1/ZEB1 | 60 0. 177514792899408 |
| GO:0030282 BP | GO:0030282 | bone                        | 32/1414 | 123/18903 | 2. 814793129              | 1. 3569163              | 8. 69537225               | COL1A2/TWIST1/ECM1/RSPO                            | 32 0. 260162601626016 |
| GO:0090092 BP | GO:0090092 | regulation of transmembrane | 54/1414 | 290/18903 | 3. 533760021<br>96157e-10 | 1. 6895428<br>0394277e- | 1. 08269040<br>879944e-08 | NBL1/LTBP1/DKK3/FSTL1/D<br>AB2/ZEB2/RBPJ/FBN1/ZEB1 | 54 0. 186206896551724 |
| GO:0072593 BP | GO:0072593 | reactive oxygen             | 47/1414 | 235/18903 | 4. 251533363<br>2377e-10  | 2. 0161946<br>4290776e- | 1. 29201497<br>414267e-08 | PDGFRB/CCN6/H19/FOXO1/P<br>RDX4/PLCG2/CRYAB/GPX3/M | 47 0. 2               |
| GO:0150116 BP | GO:0150116 | regulation of               | 23/1414 | 69/18903  | 4. 451038783              | 2. 0937830              | 1. 34173503               | THY1/ACTG1/APOD/PIK3R1/                            | 23 0. 333333333333333 |
| GO:0043434 BP | GO:0043434 | response to peptide         | 69/1414 | 421/18903 | 4. 767116426<br>09127e-10 | 2. 2197766<br>5903923e- | 1. 42247411<br>12271e-08  | COL1A1/COL3A1/EGR1/SOCS<br>3/ZFP36L1/FOS/FBN1/CTSK | 69 0. 163895486935867 |
| GO:0045185 BP | GO:0045185 | maintenance                 | 27/1414 | 93/18903  | 4. 824210733              | 2. 2197766              | 1. 42247411               | NBL1/LTBP1/FLNA/FBN1/AN                            | 27 0. 290322580645161 |
| GO:0001822 BP | GO:0001822 | kidney development          | 56/1414 | 309/18903 | 4. 833047071<br>79808e-10 | 2. 2197766<br>5903923e- | 1. 42247411<br>12271e-08  | EGR1/PDGFR/ACTG1/PDGFRB<br>/SOX4/SIX1/FBN1/NOTCH2/ | 56 0. 181229773462783 |
| GO:0071453 BP | GO:0071453 | cellular                    | 39/1414 | 175/18903 | 4. 963715889              | 2. 2479142              | 1. 44050519               | EGR1/ZFP36L1/AQP1/FOS/T                            | 39 0. 222857142857143 |
| GO:1901654 BP | GO:1901654 | response to                 | 43/1414 | 205/18903 | 4. 971385857              | 2. 2479142              | 1. 44050519               | FOSB/FOXP1/POSTN/AQP1/F                            | 43 0. 209756097560976 |
| GO:0045936 BP | GO:0045936 | negative regulation of      | 71/1414 | 440/18903 | 5. 381871455<br>76493e-10 | 2. 4148043<br>2319053e- | 1. 54745146<br>068188e-08 | JUN/THY1/SOCS3/HEXIM1/S<br>H3BP5/H19/GADD45B/DNAJA | 71 0. 161363636363636 |
| GO:0030168 BP | GO:0030168 | platelet                    | 33/1414 | 133/18903 | 5. 702048887              | 2. 5389352              | 1. 62699683               | COL3A1/PDGFR/ACTG1/                                | 33 0. 24812030075188  |

|               |            |                                             |         |           |                 |               |                |                         |    |                   |
|---------------|------------|---------------------------------------------|---------|-----------|-----------------|---------------|----------------|-------------------------|----|-------------------|
| GO:0010563 BP | GO:0010563 | negative regulation of cellular response to | 71/1414 | 441/18903 | 5.958727040e-10 | 2.6331253e-08 | 1.68735563e-08 | JUN/THY1/SOCS3/HEXIM1/S | 71 | 0.160997732426304 |
| GO:0071496 BP | GO:0071496 | cellular response to                        | 58/1414 | 328/18903 | 6.314192587e-10 | 2.7640738e-08 | 1.77126988e-08 | H3BP5/H19/GADD45B/DNAJA | 58 | 0.176829268292683 |
| GO:0010810 BP | GO:0010810 | regulation of                               | 45/1414 | 222/18903 | 6.349835447e-08 | 2.7640738e-08 | 1.77126988e-08 | COL1A1/POSTN/AQP1/FOS/K | 45 | 0.202702702702703 |
| GO:0002688 BP | GO:0002688 | regulation of                               | 32/1414 | 127/18903 | 6.812613718e-08 | 2.9435537e-08 | 1.88628392e-08 | COL1A1/THY1/DAB2/ACTG1/ | 32 | 0.251968503937008 |
| GO:0008154 BP | GO:0008154 | actin                                       | 42/1414 | 200/18903 | 7.601469462e-08 | 3.2602478e-08 | 2.08922740e-08 | NBL1/PTN/TRPV4/VEGFA/TN | 42 | 0.21              |
| GO:1901653 BP | GO:1901653 | cellular response to                        | 63/1414 | 373/18903 | 7.972204081e-10 | 3.3942968e-08 | 2.17512844e-08 | CAPZB/ENAH/LIMA1/WIPF1/ | 63 | 0.168900804289544 |
| GO:2000379 BP | GO:2000379 | positive                                    | 23/1414 | 71/18903  | 8.475962628e-08 | 3.5826297e-08 | 2.29581565e-08 | GJA1/SOCS3/ZFP36L1/FOS/ | 23 | 0.323943661971831 |
| GO:2000377 BP | GO:2000377 | regulation of                               | 35/1414 | 149/18903 | 8.559224158e-08 | 3.5917952e-08 | 2.30168913e-08 | FBN1/PIK3R3/FOXO1/NR4A1 | 35 | 0.23489932885906  |
| GO:0055076 BP | GO:0055076 | transition                                  | 34/1414 | 143/18903 | 1.057843322e-08 | 4.4074286e-08 | 2.82436213e-08 | PDGFRB/H19/PLCG2/SOD2/C | 34 | 0.237762237762238 |
| GO:0002399 BP | GO:0002399 | MHC class II                                | 11/1414 | 16/18903  | 1.215539435e-08 | 4.9709958e-08 | 3.18550647e-08 | PDGFRB/CCN6/H19/FOXO1/P | 11 | 0.6875            |
| GO:0002503 BP | GO:0002503 | peptide                                     | 11/1414 | 16/18903  | 1.215539435e-08 | 4.9709958e-08 | 3.18550647e-08 | SLC40A1/MT1G/MT1M/MT1A/ | 11 | 0.6875            |
| GO:1901214 BP | GO:1901214 | regulation of neuron death                  | 57/1414 | 325/18903 | 1.218673766e-09 | 4.619144e-08  | 3.18550647e-08 | HLA-DRB1/HLA-DRA/HLA-   | 57 | 0.175384615384615 |
| GO:0009612 BP | GO:0009612 | response to                                 | 43/1414 | 211/18903 | 1.277752638e-08 | 5.1757855e-08 | 3.31673948e-08 | JUN/EGR1/FOS/GPNMB/SIX1 | 43 | 0.203791469194313 |
| GO:0002237 BP | GO:0002237 | response to molecule of                     | 61/1414 | 360/18903 | 1.301913435e-09 | 5.9570011e-08 | 6.58966e-08    | /RETREG1/UBB/DDIT3/SOD2 | 61 | 0.169444444444444 |
| GO:0110148 BP | GO:0110148 | biomineraliza                               | 39/1414 | 181/18903 | 1.401243601e-08 | 5.5982561e-08 | 3.58746649e-08 | COL1A1/MMP2/JUN/FOSB/AQ | 39 | 0.215469613259669 |
| GO:0008064 BP | GO:0008064 | regulation of                               | 36/1414 | 159/18903 | 1.448372886e-08 | 5.7471830e-08 | 3.68290162e-08 | COL1A1/COL1A2/TWIST1/EC | 36 | 0.226415094339623 |
| GO:0001906 BP | GO:0001906 | cell killing                                | 40/1414 | 189/18903 | 1.509571697e-08 | 5.9495484e-08 | 3.81258114e-08 | CAPZB/LIMA1/SCIN/GSN/AR | 40 | 0.211640211640212 |
| GO:0031214 BP | GO:0031214 | biomineral                                  | 38/1414 | 174/18903 | 1.519883116e-08 | 5.9499853e-08 | 3.81286114e-08 | CADM1/TUBB/LAG3/TUBB4B/ | 38 | 0.218390804597701 |
| GO:0010595 BP | GO:0010595 | positive                                    | 32/1414 | 131/18903 | 1.581025722e-08 | 6.1480820e-08 | 3.93980515e-08 | COL1A1/COL1A2/TWIST1/EC | 32 | 0.244274809160305 |
| GO:0031532 BP | GO:0031532 | actin                                       | 29/1414 | 111/18903 | 1.717840894e-08 | 6.6358714e-08 | 4.25238969e-08 | FOXP1/RIN2/SMOC2/SPARC/ | 29 | 0.261261261261261 |
| GO:0002064 BP | GO:0002064 | epithelial                                  | 43/1414 | 213/18903 | 1.733229728e-08 | 6.6512690e-08 | 4.26225676e-08 | PDGFRA/ANTXR1/FLNA/NOTC | 43 | 0.2018779342723   |
| GO:0048661 BP | GO:0048661 | positive                                    | 27/1414 | 98/18903  | 1.745497446e-08 | 6.6545664e-08 | 4.26436975e-08 | FRMD6/NOTCH2/COL15A1/FR | 27 | 0.275510204081633 |
| GO:1902905 BP | GO:1902905 | positive                                    | 38/1414 | 176/18903 | 2.137335982e-08 | 8.0955070e-08 | 5.18775124e-08 | MMP2/GJA1/JUN/FOXP1/PDG | 38 | 0.215909090909091 |
| GO:0032496 BP | GO:0032496 | response to lipopolysacch                   | 58/1414 | 339/18903 | 2.287206606e-09 | 8.2460692e-08 | 5.539195e-08   | TPM1/TNXB/HSPA1A/HSPA1B | 58 | 0.171091445427729 |
| GO:0034341 BP | GO:0034341 | response to                                 | 33/1414 | 140/18903 | 2.348973355e-08 | 8.7830522e-08 | 5.62834304e-08 | FOXP1/FOS/DIO2/TIMP4/PL | 33 | 0.235714285714286 |
| GO:0030832 BP | GO:0030832 | regulation of                               | 36/1414 | 162/18903 | 2.482405702e-08 | 9.2228487e-08 | 5.91017274e-08 | CG2/ZFP36/NR4A1/NFKBIA/ | 36 | 0.222222222222222 |
| GO:2001236 BP | GO:2001236 | regulation of                               | 35/1414 | 155/18903 | 2.633104914e-08 | 9.7208233e-08 | 6.22928417e-08 | ACTG1/IFITM1/GSN/IFITM2 | 36 | 0.222222222222222 |
| GO:0045216 BP | GO:0045216 | cell-cell                                   | 42/1414 | 208/18903 | 2.654075370e-08 | 9.7366173e-08 | 6.23940525e-08 | CAPZB/LIMA1/SCIN/GSN/AR | 35 | 0.225806451612903 |
| GO:0001909 BP | GO:0001909 | leukocyte                                   | 32/1414 | 134/18903 | 2.897046806e-08 | 1.0561546e-08 | 6.76803500e-08 | LMNA/HSPA1A/COL2A1/HSPA | 42 | 0.201923076923077 |
| GO:0032271 BP | GO:0032271 | regulation of                               | 41/1414 | 201/18903 | 2.994822782e-08 | 1.0850187e-08 | 6.95300143e-08 | CDH11/GJA1/ACTG1/ACTB/F | 32 | 0.238805970149254 |
|               |            |                                             |         |           |                 |               |                | CADM1/TUBB/LAG3/TUBB4B/ | 41 | 0.203980099502488 |
|               |            |                                             |         |           |                 |               |                | CAPZB/HSPA1A/HSPA1B/SCI |    |                   |

|               |            |                               |         |           |                          |                        |                          |                                                                              |                       |
|---------------|------------|-------------------------------|---------|-----------|--------------------------|------------------------|--------------------------|------------------------------------------------------------------------------|-----------------------|
| GO:0006898 BP | GO:0006898 | receptor-mediated             | 48/1414 | 257/18903 | 3.026268463<br>74967e-09 | 1.0896434<br>5364517e- | 6.98263763<br>14328e-08  | DAB2/PLCG2/TF/MAGI2/SDC<br>BP/ANXA2/CTSL/CAV1/RABG                           | 48 0.186770428015564  |
| GO:0051235 BP | GO:0051235 | maintenance of location       | 58/1414 | 342/18903 | 3.207175105<br>3029e-09  | 1.1476964<br>6559705e- | 7.35465211<br>425936e-08 | NBL1/THY1/LTBP1/FLNA/FB<br>N1/ANK3/PLCG2/DDIT3/NFK                           | 58 0.169590643274854  |
| GO:0048771 BP | GO:0048771 | tissue                        | 38/1414 | 179/18903 | 3.523175095              | 1.2530902              | 8.03003515               | MMP2/GJA1/SEMA3C/GPNMB/                                                      | 38 0.212290502793296  |
| GO:0060562 BP | GO:0060562 | epithelial tube               | 57/1414 | 335/18903 | 3.870955283<br>78246e-09 | 1.3684413<br>4365473e- | 8.76922629<br>200096e-08 | FOXP1/TWIST1/SOX4/SIX1/<br>RSP02/RBPJ/NOTCH2/GLI3/                           | 57 0.170149253731343  |
| GO:0007044 BP | GO:0007044 | cell-                         | 26/1414 | 95/18903  | 4.061883062              | 1.4272869              | 9.14632007               | THY1/ACTG1/ACTN1/APOD/F                                                      | 26 0.273684210526316  |
| GO:0007265 BP | GO:0007265 | Ras protein signal            | 59/1414 | 353/18903 | 4.122349366<br>6972e-09  | 1.4398601<br>1113442e- | 9.22689101<br>868375e-08 | COL1A2/COL3A1/JUN/PDGFR<br>B/NOTCH2/NTN1/PDPN/FGF2                           | 59 0.1671388101983    |
| GO:0031960 BP | GO:0031960 | response to                   | 36/1414 | 165/18903 | 4.188247378              | 1.4541694              | 9.31858799               | COL1A1/FOSB/ZFP36L1/AQP                                                      | 36 0.218181818181818  |
| GO:0006979 BP | GO:0006979 | response to oxidative         | 68/1414 | 434/18903 | 4.362782831<br>27172e-09 | 1.5058054<br>5886437e- | 9.64948105<br>502702e-08 | COL1A1/MMP2/JUN/PDGFR<br>FOXP1/AQP1/FOS/PDGFRB/T                             | 68 0.15668202764977   |
| GO:0051098 BP | GO:0051098 | regulation of binding         | 61/1414 | 372/18903 | 4.776058912<br>64183e-09 | 1.6387500<br>9631999e- | 1.05014149<br>837716e-07 | JUN/TWIST1/DAB2/ACTB/CC<br>PG1/CDON/HES1/CTHRC1/DD                           | 61 0.163978494623656  |
| GO:0002443 BP | GO:0002443 | leukocyte mediated            | 71/1414 | 463/18903 | 5.032580084<br>28304e-09 | 1.7166689<br>8430544e- | 1.10007336<br>899286e-07 | CADM1/C1R/TUBB/LAG3/S10<br>OA13/PLCG2/TUBB4B/C1S/C                           | 71 0.153347732181425  |
| GO:1904019 BP | GO:1904019 | epithelial                    | 32/1414 | 137/18903 | 5.198949771              | 1.7631089              | 1.12983296               | ZFP36L1/H19/ZFP36/GSN/A                                                      | 32 0.233576642335766  |
| GO:0071675 BP | GO:0071675 | regulation of                 | 30/1414 | 123/18903 | 5.288999086              | 1.7832792              | 1.14275848               | NBL1/ECM1/APOD/TRPV4/SE                                                      | 30 0.24390243902439   |
| GO:0036294 BP | GO:0036294 | cellular                      | 35/1414 | 159/18903 | 5.363658090              | 1.7980584              | 1.15222927               | EGR1/ZFP36L1/AQP1/FOS/T                                                      | 35 0.220125786163522  |
| GO:0050866 BP | GO:0050866 | negative regulation of        | 43/1414 | 221/18903 | 5.603062232<br>12124e-09 | 1.8675806<br>8571218e- | 1.19678039<br>015113e-07 | PDGFRA/GPNMB/RUNX1/GLI3<br>/LAG3/NR1D1/SERPINE2/IN                           | 43 0.194570135746606  |
| GO:0070665 BP | GO:0070665 | positive                      | 36/1414 | 167/18903 | 5.885931179              | 1.9507179              | 1.25005631               | HES1/VCAM1/CDKN1A/PNP/S                                                      | 36 0.215568862275449  |
| GO:1904035 BP | GO:1904035 | regulation of                 | 28/1414 | 110/18903 | 6.143262467              | 2.0244999              | 1.29733720               | ZFP36L1/H19/ZFP36/GSN/A                                                      | 28 0.2545454545454545 |
| GO:0045637 BP | GO:0045637 | regulation of                 | 42/1414 | 214/18903 | 6.441251841              | 2.1107765              | 1.35262479               | MAFB/FOXP1/ZFP36L1/FOS/                                                      | 42 0.196261682242991  |
| GO:0072676 BP | GO:0072676 | lymphocyte                    | 30/1414 | 124/18903 | 6.484134533              | 2.1129584              | 1.35402303               | ECM1/CD99/APOD/SAA1/SEL                                                      | 30 0.241935483870968  |
| GO:0070997 BP | GO:0070997 | neuron death                  | 60/1414 | 368/18903 | 7.950315519<br>76474e-09 | 2.5707169<br>2451411e- | 1.64736315<br>138903e-07 | JUN/EGR1/FOS/GPNMB/SIX1<br>/RETREG1/UBB/DDIT3/SOD2                           | 60 0.16304347826087   |
| GO:0033674 BP | GO:0033674 | positive regulation of kinase | 74/1414 | 496/18903 | 7.977023201<br>38958e-09 | 2.5707169<br>2451411e- | 1.64736315<br>138903e-07 | EGR1/PDGFR/PDGFRB/CHI3<br>L1/MAP2K6/FGFR1/GPRC5C/<br>BMP2/FGF2/CDKN1A/GPRC5A | 74 0.149193548387097  |
| GO:0071900 BP | GO:0071900 | regulation of protein         | 63/1414 | 395/18903 | 8.076225234<br>20977e-09 | 2.5883858<br>1270031e- | 1.65868570<br>310462e-07 | THY1/PDGFRB/DAB2/ACTB/C<br>CNL1/HEXIM1/TNXB/MAP2K6                           | 63 0.159493670886076  |
| GO:0043534 BP | GO:0043534 | blood vessel                  | 37/1414 | 177/18903 | 8.762235308              | 2.7929026              | 1.78974389               | PIK3R3/NR4A1/FGFR1/ETS1                                                      | 37 0.209039548022599  |
| GO:0072678 BP | GO:0072678 | T cell                        | 22/1414 | 73/18903  | 8.993751018              | 2.8357053              | 1.81717268               | ECM1/CD99/APOD/SELENOK/                                                      | 22 0.301369863013699  |
| GO:0150076 BP | GO:0150076 | neuroinflammation             | 22/1414 | 73/18903  | 8.993751018              | 2.8357053              | 1.81717268               | JUN/PLCG2/MMP3/NR1D1/NU                                                      | 22 0.301369863013699  |

|               |                                         |         |           |             |           |            |                         |    |                   |
|---------------|-----------------------------------------|---------|-----------|-------------|-----------|------------|-------------------------|----|-------------------|
| GO:0007266 BP | GO:0007266 Rho protein                  | 32/1414 | 140/18903 | 9.146825701 | 2.8531248 | 1.82833538 | COL1A2/COL3A1/PDGFRB/NT | 32 | 0.228571428571429 |
| GO:0030833 BP | GO:0030833 regulation of                | 32/1414 | 140/18903 | 9.146825701 | 2.8531248 | 1.82833538 | CAPZB/SCIN/GSN/ARHGAP18 | 32 | 0.228571428571429 |
| GO:0003206 BP | GO:0003206 cardiac                      | 30/1414 | 126/18903 | 9.671966571 | 3.0008819 | 1.92302090 | SOX4/SEMA3C/RBPJ/TPM1/N | 30 | 0.238095238095238 |
| GO:0002697 BP | GO:0002697 regulation of<br>immune      | 61/1414 | 379/18903 | 9.840345593 | 3.0369701 | 1.94614687 | CADM1/TWIST1/LAG3/PLCG2 | 61 | 0.160949868073879 |
| GO:0061564 BP | GO:0061564 axon<br>development          | 73/1414 | 490/18903 | 1.071503472 | 3.2805216 | 2.10221922 | MMP2/TNC/CDH11/JUN/THY1 | 73 | 0.148979591836735 |
| GO:0009266 BP | GO:0009266 response to                  | 38/1414 | 186/18903 | 1.074197912 | 3.2805216 | 2.10221922 | FOS/DIO2/IGFBP7/PCSK1N/ | 38 | 0.204301075268817 |
| GO:0022408 BP | GO:0022408 negative                     | 40/1414 | 202/18903 | 1.129086185 | 3.4289308 | 2.19732255 | GPNMB/RUNX1/GLI3/LAG3/S | 40 | 0.198019801980198 |
| GO:0003151 BP | GO:0003151 outflow tract                | 23/1414 | 80/18903  | 1.134551087 | 3.4289308 | 2.19732255 | JUN/TWIST1/SEMA3C/SIX1/ | 23 | 0.2875            |
| GO:0045862 BP | GO:0045862 positive<br>regulation of    | 60/1414 | 372/18903 | 1.199973046 | 3.6022425 | 2.30838393 | PCOLCE/ANTXR1/DAB2/HSPA | 60 | 0.161290322580645 |
| GO:0042326 BP | GO:0042326 negative<br>regulation of    | 61/1414 | 381/18903 | 1.204247038 | 3.6022425 | 2.30838393 | JUN/THY1/SOCS3/HEXIM1/S | 61 | 0.16010498687664  |
| GO:2000116 BP | GO:2000116 regulation of                | 44/1414 | 235/18903 | 1.263884412 | 3.7613458 | 2.41034025 | H3BP5/GADD45B/DNAJA1/BM | 44 | 0.187234042553191 |
| GO:0048762 BP | GO:0048762 mesenchymal<br>cell          | 46/1414 | 252/18903 | 1.350523659 | 3.9987840 | 2.56249506 | AQP1/NR4A1/CRYAB/GSN/CF | 46 | 0.182539682539683 |
| GO:0016049 BP | GO:0016049 cell growth                  | 73/1414 | 493/18903 | 1.390487157 | 4.0963189 | 2.62499728 | COL1A1/S100A4/TWIST1/SE | 73 | 0.148073022312373 |
| GO:0030098 BP | GO:0030098 lymphocyte<br>differentiati  | 65/1414 | 419/18903 | 1.424161648 | 4.1744396 | 2.67505845 | TNC/GJA1/IGFBP4/FOXP1/S | 65 | 0.155131264916468 |
| GO:1903053 BP | GO:1903053 regulation of                | 19/1414 | 57/18903  | 1.453885168 | 4.2402560 | 2.71723485 | MAFB/EGR1/FOXP1/ZFP36L1 | 19 | 0.333333333333333 |
| GO:0032623 BP | GO:0032623 interleukin-2                | 20/1414 | 63/18903  | 1.573133492 | 4.5426176 | 2.91099376 | /SOX4/KLF6/LGALS1/ACTB/ | 20 | 0.317460317460317 |
| GO:0032663 BP | GO:0032663 regulation of                | 20/1414 | 63/18903  | 1.573133492 | 4.5426176 | 2.91099376 | AEBP1/ANTXR1/RUNX1/FAP/ | 20 | 0.317460317460317 |
| GO:0042026 BP | GO:0042026 protein                      | 13/1414 | 27/18903  | 1.614953217 | 4.6404049 | 2.97365770 | RUNX1/LAG3/PLCG2/ZFP36/ | 13 | 0.481481481481481 |
| GO:0031668 BP | GO:0031668 cellular<br>response to      | 47/1414 | 262/18903 | 1.660931928 | 4.7491254 | 3.04332780 | HSPA1A/HSPA1B/HSPA8/CRY | 47 | 0.179389312977099 |
| GO:0016032 BP | GO:0016032 viral process                | 65/1414 | 421/18903 | 1.719281289 | 4.8717603 | 3.12191451 | COL1A1/POSTN/FOS/KLF10/ | 65 | 0.154394299287411 |
| GO:0033627 BP | GO:0033627 cell adhesion                | 24/1414 | 88/18903  | 1.720525686 | 4.8717603 | 3.12191451 | CTSK/LAMP2/FOXO1/TNRC6A | 24 | 0.272727272727273 |
| GO:0032231 BP | GO:0032231 regulation of                | 27/1414 | 108/18903 | 1.732426090 | 4.8817591 | 3.12832191 | JUN/ITGB5/LGALS1/GALNT1 | 27 | 0.25              |
| GO:0071456 BP | GO:0071456 cellular                     | 33/1414 | 151/18903 | 1.758311694 | 4.9308808 | 3.15980001 | /HEXIM1/IFITM1/HSPA1A/H | 33 | 0.218543046357616 |
| GO:0002263 BP | GO:0002263 cell<br>activation           | 51/1414 | 297/18903 | 1.863288136 | 5.2002677 | 3.33242818 | ITGA11/ITGB5/FBN1/ITGA1 | 51 | 0.171717171717172 |
| GO:0001558 BP | GO:0001558 regulation of<br>cell growth | 65/1414 | 422/18903 | 1.887810107 | 5.2436173 | 3.36020736 | ACTG1/TPM1/FLNA/PIK3R1/ | 65 | 0.154028436018957 |
|               |                                         |         |           | 84344e-08   | 138337e-  | 488824e-07 | EGR1/ZFP36L1/AQP1/FOS/T |    |                   |
|               |                                         |         |           |             |           |            | FOXP1/LGALS1/NOTCH2/S10 |    |                   |
|               |                                         |         |           |             |           |            | OA13/PLCG2/ITM2A/JUNB/X |    |                   |
|               |                                         |         |           |             |           |            | TNC/GJA1/IGFBP4/FOXP1/S |    |                   |
|               |                                         |         |           |             |           |            | EMA3C/DAB2/IGFBP7/FHL1/ |    |                   |

|               |                                      |         |           |             |           |            |                         |    |                    |
|---------------|--------------------------------------|---------|-----------|-------------|-----------|------------|-------------------------|----|--------------------|
| GO:0001774 BP | GO:0001774 microglial                | 17/1414 | 47/18903  | 2.065467957 | 5.7098931 | 3.65900559 | JUN/NR1D1/IFNGR2/TYROBP | 17 | 0.361702127659574  |
| GO:0051893 BP | GO:0051893 regulation of             | 20/1414 | 64/18903  | 2.128340581 | 5.8284556 | 3.73498265 | THY1/ACTG1/APOD/SDC4/VE | 20 | 0.3125             |
| GO:0090109 BP | GO:0090109 regulation of             | 20/1414 | 64/18903  | 2.128340581 | 5.8284556 | 3.73498265 | THY1/ACTG1/APOD/SDC4/VE | 20 | 0.3125             |
| GO:0070167 BP | GO:0070167 regulation of             | 26/1414 | 103/18903 | 2.559310353 | 6.9714891 | 4.46745971 | TWIST1/ECM1/ASPN/LTBP3/ | 26 | 0.2524271844466019 |
| GO:0050679 BP | GO:0050679 positive                  | 42/1414 | 224/18903 | 2.581590348 | 6.9714891 | 4.46745971 | JUN/TWIST1/ECM1/RBPJ/NO | 42 | 0.1875             |
| GO:0097191 BP | GO:0097191 extrinsic                 | 42/1414 | 224/18903 | 2.581590348 | 6.9714891 | 4.46745971 | LMNA/HSPA1A/COL2A1/HSPA | 42 | 0.1875             |
| GO:0070527 BP | GO:0070527 platelet                  | 21/1414 | 71/18903  | 2.817487225 | 7.5734575 | 4.85321229 | PDGFRA/MYL9/ACTG1/ACTB/ | 21 | 0.295774647887324  |
| GO:0001885 BP | GO:0001885 endothelial               | 20/1414 | 65/18903  | 2.859539584 | 7.6465884 | 4.90007591 | COL15A1/ICAM1/VEGFA/AFD | 20 | 0.307692307692308  |
| GO:0001894 BP | GO:0001894 tissue homeostasis        | 48/1414 | 275/18903 | 2.870911841 | 7.6465884 | 4.90007591 | GJA1/COL3A1/ACTG1/ACTB/ | 48 | 0.1745454545454545 |
| GO:0002690 BP | GO:0002690 positive                  | 25/1414 | 97/18903  | 3.019462283 | 8.0056924 | 5.13019644 | PTN/TRPV4/VEGFA/CD74/AI | 25 | 0.257731958762887  |
| GO:0002366 BP | GO:0002366 leukocyte activation      | 50/1414 | 293/18903 | 3.155276943 | 8.3279323 | 5.33669370 | FOXP1/LGALS1/NOTCH2/S10 | 50 | 0.170648464163823  |
| GO:0007163 BP | GO:0007163 establishment             | 43/1414 | 234/18903 | 3.259235163 | 8.5635669 | 5.48769277 | GJA1/AQP1/LMNA/ACTB/HES | 43 | 0.183760683760684  |
| GO:0051651 BP | GO:0051651 maintenance               | 42/1414 | 226/18903 | 3.365071971 | 8.8020021 | 5.64048646 | THY1/FLNA/ANK3/PLCG2/DD | 42 | 0.185840707964602  |
| GO:0002396 BP | GO:0002396 MHC protein               | 11/1414 | 20/18903  | 3.528647026 | 9.1332125 | 5.85273221 | HLA-DRB1/HLA-DRA/HLA-   | 11 | 0.55               |
| GO:0002501 BP | GO:0002501 peptide                   | 11/1414 | 20/18903  | 3.528647026 | 9.1332125 | 5.85273221 | HLA-DRB1/HLA-DRA/HLA-   | 11 | 0.55               |
| GO:0010952 BP | GO:0010952 positive                  | 38/1414 | 194/18903 | 3.538669686 | 9.1332125 | 5.85273221 | PCOLCE/ANTXR1/PCOLCE2/G | 38 | 0.195876288659794  |
| GO:0070663 BP | GO:0070663 regulation of leukocyte   | 47/1414 | 269/18903 | 3.868235078 | 9.9398304 | 6.36962799 | GPNMB/HES1/VCAM1/CDKN1A | 47 | 0.174721189591078  |
| GO:0110149 BP | GO:0110149 regulation of             | 26/1414 | 105/18903 | 3.919630367 | 1.0027721 | 6.42594987 | TWIST1/ECM1/ASPN/LTBP3/ | 26 | 0.247619047619048  |
| GO:0060541 BP | GO:0060541 respiratory               | 40/1414 | 211/18903 | 4.024298873 | 1.0250539 | 6.56873606 | COL3A1/PDGFRB/PDGFRB/SI | 40 | 0.18957345971564   |
| GO:0045667 BP | GO:0045667 regulation of             | 31/1414 | 141/18903 | 4.077532629 | 1.0340977 | 6.62669032 | TWIST1/SMOC1/GLI3/IFITM | 31 | 0.219858156028369  |
| GO:0071216 BP | GO:0071216 cellular response to      | 46/1414 | 261/18903 | 4.107460463 | 1.0371782 | 6.64643067 | NOTCH2/PLCG2/ZFP36/DDIT | 46 | 0.176245210727969  |
| GO:0060537 BP | GO:0060537 muscle tissue development | 64/1414 | 422/18903 | 4.408839424 | 1.1084810 | 7.10335244 | GJA1/COL3A1/EGR1/PDGFRB | 64 | 0.151658767772512  |
| GO:0044089 BP | GO:0044089 positive regulation of    | 72/1414 | 498/18903 | 4.706926744 | 1.1783477 | 7.55107154 | THBS2/THY1/PTPRD/TPM1/D | 72 | 0.144578313253012  |
| GO:0046635 BP | GO:0046635 positive                  | 21/1414 | 73/18903  | 4.830178321 | 1.1984356 | 7.67979847 | RUNX1/GLI3/ZBTB16/PPN/C | 21 | 0.287671232876712  |
| GO:0051384 BP | GO:0051384 response to               | 31/1414 | 142/18903 | 4.847914537 | 1.1984356 | 7.67979847 | FOSB/ZFP36L1/AQP1/FOS/C | 31 | 0.21830985915493   |
| GO:0030336 BP | GO:0030336 negative regulation of    | 58/1414 | 368/18903 | 4.848805459 | 1.1984356 | 7.67979847 | GJA1/NBL1/COL3A1/THY1/T | 58 | 0.157608695652174  |
| GO:1903844 BP | GO:1903844 regulation of             | 32/1414 | 150/18903 | 5.273786585 | 1.2979745 | 8.31766207 | LTBP1/DKK3/DAB2/ZEB2/FB | 32 | 0.2133333333333333 |
| GO:0060249 BP | GO:0060249 anatomical structure      | 54/1414 | 333/18903 | 5.334805930 | 1.3074757 | 8.37854748 | GJA1/COL3A1/ACTG1/ACTB/ | 54 | 0.162162162162162  |
|               |                                      |         |           | 07304e-08   | 5588723e- | 239246e-07 | CTSK/LAMP2/LTBP3/COMP/C |    |                    |

|               |                                     |         |           |             |           |            |                              |    |                   |
|---------------|-------------------------------------|---------|-----------|-------------|-----------|------------|------------------------------|----|-------------------|
| GO:0034405 BP | GO:0034405 response to              | 14/1414 | 34/18903  | 5.391806297 | 1.3159165 | 8.43263781 | MMP2/PDGFRB/PTGS2/KLF2/      | 14 | 0.411764705882353 |
| GO:0031349 BP | GO:0031349 positive regulation of   | 51/1414 | 307/18903 | 5.651419391 | 1.3735303 | 8.80183783 | CADM1/LGALS1/HEXIM1/NEA      | 51 | 0.166123778501629 |
| GO:0051258 BP | GO:0051258 protein polymerization   | 48/1414 | 281/18903 | 5.741216359 | 1.3895649 | 8.90459021 | CAPZB/MAP7D3/HSPA1A/UBE      | 48 | 0.170818505338078 |
| GO:0032963 BP | GO:0032963 collagen                 | 26/1414 | 107/18903 | 5.929196080 | 1.4291322 | 9.15814496 | COL1A1/MMP2/COL1A2/COL5      | 26 | 0.242990654205607 |
| GO:0002269 BP | GO:0002269 leukocyte                | 17/1414 | 50/18903  | 5.979749922 | 1.4295033 | 9.16052285 | JUN/NR1D1/IFNGR2/TYROBP      | 17 | 0.34              |
| GO:2001238 BP | GO:2001238 positive                 | 17/1414 | 50/18903  | 5.979749922 | 1.4295033 | 9.16052285 | ITM2C/TNFRSF12A/INHBA/P      | 17 | 0.34              |
| GO:0071248 BP | GO:0071248 cellular                 | 38/1414 | 198/18903 | 6.230636002 | 1.4833999 | 9.50590266 | JUN/FOSB/AQP1/FOS/SLC40      | 38 | 0.191919191919192 |
| GO:0031667 BP | GO:0031667 response to nutrient     | 69/1414 | 474/18903 | 6.854185029 | 1.6249350 | 1.04128855 | COL1A1/POSTN/FOS/KLF10/      | 69 | 0.145569620253165 |
| GO:0003205 BP | GO:0003205 cardiac                  | 34/1414 | 167/18903 | 6.880832394 | 1.6249350 | 1.04128855 | SOX4/SEMA3C/RBPJ/TPM1/N      | 34 | 0.203592814371257 |
| GO:0002761 BP | GO:0002761 regulation of            | 28/1414 | 122/18903 | 6.944765588 | 1.6334200 | 1.04672591 | MAFB/FOXP1/ZFP36L1/FOS/      | 28 | 0.229508196721311 |
| GO:0062197 BP | GO:0062197 cellular response to     | 55/1414 | 345/18903 | 7.260867952 | 1.7009093 | 1.08997430 | MMP2/JUN/PDGFR/FOXP1/Z       | 55 | 0.159420289855072 |
| GO:0034101 BP | GO:0034101 erythrocyte              | 30/1414 | 137/18903 | 7.386128655 | 1.7233315 | 1.10434285 | MAFB/ZFP36L1/HSPA1A/HSP      | 30 | 0.218978102189781 |
| GO:0055072 BP | GO:0055072 iron ion                 | 23/1414 | 88/18903  | 8.075022331 | 1.8765579 | 1.20253320 | SLC40A1/MELTF/TF/SLC39A      | 23 | 0.261363636363636 |
| GO:1902107 BP | GO:1902107 positive                 | 36/1414 | 184/18903 | 8.293962802 | 1.9050160 | 1.22076963 | ZFP36L1/FOS/SOX4/ACTB/K      | 36 | 0.195652173913043 |
| GO:1903708 BP | GO:1903708 positive                 | 36/1414 | 184/18903 | 8.293962802 | 1.9050160 | 1.22076963 | ZFP36L1/FOS/SOX4/ACTB/K      | 36 | 0.195652173913043 |
| GO:0034332 BP | GO:0034332 adherens                 | 17/1414 | 51/18903  | 8.347398901 | 1.9050160 | 1.22076963 | CDH11/ACTB/BMP6/VEGFA/M      | 17 | 0.333333333333333 |
| GO:0022612 BP | GO:0022612 gland                    | 28/1414 | 123/18903 | 8.358121231 | 1.9050160 | 1.22076963 | MMP2/TNC/SEMA3C/ID4/NOT      | 28 | 0.227642276422764 |
| GO:0035633 BP | GO:0035633 maintenance              | 14/1414 | 35/18903  | 8.368563800 | 1.9050160 | 1.22076963 | GJA1/ACTG1/ACTB/PTGS2/V      | 14 | 0.4               |
| GO:0009636 BP | GO:0009636 response to              | 44/1414 | 250/18903 | 8.393435841 | 1.9050160 | 1.22076963 | FOS/PDGFRB/GPX8/H19/MT1      | 44 | 0.176             |
| GO:0045860 BP | GO:0045860 positive regulation of   | 63/1414 | 420/18903 | 8.474249110 | 1.9128320 | 1.22577828 | EGR1/PDGFRB/CHI3L1/MAP2      | 63 | 0.15              |
| GO:2000146 BP | GO:2000146 negative regulation of   | 59/1414 | 383/18903 | 8.493459505 | 1.9128320 | 1.22577828 | GJA1/NBL1/COL3A1/THY1/T      | 59 | 0.154046997389034 |
| GO:0032835 BP | GO:0032835 glomerulus               | 20/1414 | 69/18903  | 8.734869701 | 1.9596344 | 1.25577013 | EGR1/PDGFR/FOXP1/PDGFRB      | 20 | 0.289855072463768 |
| GO:0001933 BP | GO:0001933 negative regulation of   | 54/1414 | 338/18903 | 8.861375072 | 1.9803984 | 1.26907613 | JUN/THY1/SOCS3/HEXIM1/S      | 54 | 0.159763313609467 |
| GO:0038066 BP | GO:0038066 p38MAPK                  | 18/1414 | 57/18903  | 8.980366396 | 1.9993311 | 1.28120856 | ZFP36L1/MAP2K6/GADD45B/      | 18 | 0.315789473684211 |
| GO:0048568 BP | GO:0048568 embryonic organ          | 66/1414 | 449/18903 | 9.123426810 | 2.0234581 | 1.29666954 | MAFB/PDGFR/FOXP1/SOCS3/ZFP36 | 66 | 0.146993318485523 |
| GO:0050671 BP | GO:0050671 positive                 | 31/1414 | 146/18903 | 9.503206424 | 2.0997046 | 1.34552974 | HES1/VCAM1/CDKN1A/PNP/S      | 31 | 0.212328767123288 |
| GO:0007517 BP | GO:0007517 muscle organ development | 55/1414 | 348/18903 | 9.767369441 | 2.1418445 | 1.37253379 | COL6A3/COL3A1/EGR1/FOS/      | 55 | 0.158045977011494 |
|               |                                     |         |           | 9488e-08    | 847702e-  | 059597e-06 | ITGA11/TWIST1/SIX1/RBPJ      |    |                   |

|               |                                      |         |           |                          |                        |                          |                                                    |                      |
|---------------|--------------------------------------|---------|-----------|--------------------------|------------------------|--------------------------|----------------------------------------------------|----------------------|
| GO:0070661 BP | GO:0070661 leukocyte proliferation   | 55/1414 | 348/18903 | 9.767369441<br>9488e-08  | 2.1418445<br>847702e-  | 1.37253379<br>059597e-06 | GPNMB/HES1/JUNB/VCAM1/C<br>DKN1A/PNP/SELENOK/CD55/ | 55 0.158045977011494 |
| GO:0050729 BP | GO:0050729 positive                  | 32/1414 | 154/18903 | 1.009261217              | 2.2048766              | 1.41292591               | LGALS1/NEAT1/PLCG2/PLA2                            | 32 0.207792207792208 |
| GO:0048732 BP | GO:0048732 gland development         | 65/1414 | 441/18903 | 1.030652557<br>13265e-07 | 2.2432075<br>9916223e- | 1.43748909<br>284291e-06 | MMP2/TNC/MAFB/JUN/CADMI<br>/PDGFRA/DKK3/SEMA3C/LBH | 65 0.147392290249433 |
| GO:0030041 BP | GO:0030041 actin                     | 34/1414 | 170/18903 | 1.083311511              | 2.3490542              | 1.50531761               | CAPZB/SCIN/GSN/AIF1/ARH                            | 34 0.2               |
| GO:0017015 BP | GO:0017015 regulation of             | 31/1414 | 147/18903 | 1.119270286              | 2.4180383              | 1.54952389               | LTBP1/DKK3/DAB2/ZEB2/FB                            | 31 0.210884353741497 |
| GO:0001945 BP | GO:0001945 lymph vessel              | 13/1414 | 31/18903  | 1.250311319              | 2.6520239              | 1.69946621               | PDPN/FGF2/VEGFA/PKD1/NR                            | 13 0.419354838709677 |
| GO:0035767 BP | GO:0035767 endothelial               | 13/1414 | 31/18903  | 1.250311319              | 2.6520239              | 1.69946621               | SMOC2/NR4A1/FGFR1/FGF2/                            | 13 0.419354838709677 |
| GO:0061437 BP | GO:0061437 renal system              | 13/1414 | 31/18903  | 1.250311319              | 2.6520239              | 1.69946621               | EGR1/PDGFR/AQP1/PDGFRB                             | 13 0.419354838709677 |
| GO:0061440 BP | GO:0061440 kidney                    | 13/1414 | 31/18903  | 1.250311319              | 2.6520239              | 1.69946621               | EGR1/PDGFR/AQP1/PDGFRB                             | 13 0.419354838709677 |
| GO:0150117 BP | GO:0150117 positive                  | 13/1414 | 31/18903  | 1.250311319              | 2.6520239              | 1.69946621               | THY1/PIK3R1/SDC4/VEGFA/                            | 13 0.419354838709677 |
| GO:0051495 BP | GO:0051495 positive                  | 37/1414 | 195/18903 | 1.255111884              | 2.6525607              | 1.69981018               | TPM1/HSPA1A/HSPA1B/SCIN                            | 37 0.18974358974359  |
| GO:0071346 BP | GO:0071346 cellular                  | 27/1414 | 118/18903 | 1.265742038              | 2.6653694              | 1.70801823               | ACTG1/GSN/GBP2/IFNGR2/C                            | 27 0.228813559322034 |
| GO:0071375 BP | GO:0071375 cellular response to      | 50/1414 | 306/18903 | 1.295923381<br>70752e-07 | 2.7191083<br>0413668e- | 1.74245510<br>353783e-06 | SOCS3/ZFP36L1/FOS/FBN1/<br>PIK3R3/FOXO1/NR4A1/SLC3 | 50 0.163398692810458 |
| GO:0010755 BP | GO:0010755 regulation of             | 10/1414 | 18/18903  | 1.333223487              | 2.7873450              | 1.78618245               | RUNX1/MELTF/SERPINE2/AN                            | 10 0.555555555555556 |
| GO:1901888 BP | GO:1901888 regulation of             | 38/1414 | 204/18903 | 1.405045392              | 2.9270106              | 1.87568277               | THBS2/THY1/PTPRD/SIX1/A                            | 38 0.186274509803922 |
| GO:0071241 BP | GO:0071241 cellular                  | 41/1414 | 229/18903 | 1.420690204              | 2.9426224              | 1.88568713               | JUN/FOSB/AQP1/FOS/SLC40                            | 41 0.179039301310044 |
| GO:0002831 BP | GO:0002831 regulation of response to | 56/1414 | 361/18903 | 1.422629069<br>35812e-07 | 2.9426224<br>686404e-  | 1.88568713<br>150082e-06 | CADM1/FOXP1/HEXIM1/HTRA<br>1/LAG3/PLCG2/CFH/A2M/SE | 56 0.155124653739612 |
| GO:0022411 BP | GO:0022411 cellular component        | 69/1414 | 483/18903 | 1.430950336<br>60356e-07 | 2.9493757<br>2911963e- | 1.89001474<br>624483e-06 | MMP2/CAPZB/LIMA1/CTSK/F<br>AP/LAMP2/VMP1/RETREG1/H | 69 0.142857142857143 |
| GO:0044403 BP | GO:0044403 biological process        | 50/1414 | 307/18903 | 1.438098759<br>62796e-07 | 2.9536725<br>5806687e- | 1.89276823<br>403962e-06 | JUN/ITGB5/LGALS1/EEA1/I<br>FITM1/HSPA1A/HSPA1B/HSP | 50 0.162866449511401 |
| GO:0032946 BP | GO:0032946 positive                  | 31/1414 | 149/18903 | 1.544309205              | 3.1606861              | 2.02542640               | HES1/VCAM1/CDKN1A/PNP/S                            | 31 0.208053691275168 |
| GO:0032507 BP | GO:0032507 maintenance               | 19/1414 | 65/18903  | 1.577955363              | 3.2182565              | 2.06231854               | ANK3/SCIN/GSN/TXN/INSIG                            | 19 0.292307692307692 |
| GO:0043281 BP | GO:0043281 regulation of             | 38/1414 | 205/18903 | 1.602610598              | 3.2571524              | 2.08724380               | AQP1/NR4A1/CRYAB/GSN/CF                            | 38 0.185365853658537 |
| GO:0072331 BP | GO:0072331 signal                    | 34/1414 | 173/18903 | 1.683350694              | 3.4093696              | 2.18478739               | TWIST1/SOX4/HEXIM1/MAP2                            | 34 0.196531791907514 |
| GO:0050670 BP | GO:0050670 regulation of lymphocyte  | 42/1414 | 239/18903 | 1.714803470<br>69618e-07 | 3.4610548<br>9431517e- | 2.21790825<br>876603e-06 | GPNMB/HES1/VCAM1/CDKN1A<br>/PNP/SELENOK/CD55/SDC4/ | 42 0.175732217573222 |
| GO:0040013 BP | GO:0040013 negative regulation of    | 62/1414 | 419/18903 | 1.759492446<br>82048e-07 | 3.5312847<br>4914912e- | 2.26291285<br>412914e-06 | GJA1/NBL1/COL3A1/THY1/S<br>EMA3C/TPM1/DPYSL3/IFITM | 62 0.147971360381862 |
| GO:0071280 BP | GO:0071280 cellular                  | 12/1414 | 27/18903  | 1.767761266              | 3.5312847              | 2.26291285               | AQP1/MT1G/MT1M/MT1A/MT1                            | 12 0.444444444444444 |
| GO:1903055 BP | GO:1903055 positive                  | 12/1414 | 27/18903  | 1.767761266              | 3.5312847              | 2.26291285               | RUNX1/TNXB/MELTF/PDPN/C                            | 12 0.444444444444444 |
| GO:0001890 BP | GO:0001890 placenta                  | 31/1414 | 150/18903 | 1.809223886              | 3.6017757              | 2.30808479               | SOCS3/ZFP36L1/RBPJ/NOTC                            | 31 0.206666666666667 |

|               |                                      |         |           |             |           |            |                         |    |                   |
|---------------|--------------------------------------|---------|-----------|-------------|-----------|------------|-------------------------|----|-------------------|
| GO:0071774 BP | GO:0071774 response to               | 27/1414 | 120/18903 | 1.825672271 | 3.6221586 | 2.32114652 | COL1A1/ZFP36L1/SMOC2/SU | 27 | 0.225             |
| GO:0048041 BP | GO:0048041 focal                     | 22/1414 | 85/18903  | 1.855358858 | 3.6685790 | 2.35089359 | THY1/ACTG1/ACTN1/APOD/S | 22 | 0.258823529411765 |
| GO:2001235 BP | GO:2001235 positive                  | 29/1414 | 135/18903 | 1.878040820 | 3.6914918 | 2.36557652 | UBB/DDIT3/ITM2C/TNFRSF1 | 29 | 0.214814814814815 |
| GO:0002695 BP | GO:0002695 negative                  | 37/1414 | 198/18903 | 1.879604101 | 3.6914918 | 2.36557652 | GPNMB/RUNX1/GLI3/LAG3/N | 37 | 0.186868686868687 |
| GO:0006875 BP | GO:0006875 cellular metal ion        | 62/1414 | 420/18903 | 1.917448277 | 3.7531797 | 2.40510732 | THY1/SLC40A1/FLNA/MT1G/ | 62 | 0.147619047619048 |
| GO:0061028 BP | GO:0061028 establishment             | 16/1414 | 48/18903  | 2.003431941 | 3.9083673 | 2.50455441 | ICAM1/VEGFA/AFDN/EZR/MS | 16 | 0.333333333333333 |
| GO:0030218 BP | GO:0030218 erythrocyte               | 28/1414 | 128/18903 | 2.038537061 | 3.9635955 | 2.53994565 | MAFB/ZFP36L1/HSPA1A/HSP | 28 | 0.21875           |
| GO:0061900 BP | GO:0061900 glial cell                | 17/1414 | 54/18903  | 2.147985754 | 4.1625252 | 2.66742347 | JUN/NR1D1/IFNGR2/TYROBP | 17 | 0.314814814814815 |
| GO:0051348 BP | GO:0051348 negative regulation of    | 46/1414 | 276/18903 | 2.270009014 | 4.3844246 | 2.80962077 | THY1/HEXIM1/SH3BP5/GADD | 46 | 0.166666666666667 |
| GO:0044344 BP | GO:0044344 cellular                  | 26/1414 | 114/18903 | 2.306850897 | 4.4408783 | 2.84579730 | COL1A1/ZFP36L1/SMOC2/SU | 26 | 0.228070175438596 |
| GO:1990845 BP | GO:1990845 adaptive                  | 32/1414 | 160/18903 | 2.541394541 | 4.8763007 | 3.12482410 | GJA1/RBPJ/ACOT13/DIO2/M | 32 | 0.2               |
| GO:0071219 BP | GO:0071219 cellular                  | 41/1414 | 234/18903 | 2.601031871 | 4.9557016 | 3.17570567 | PLCG2/ZFP36/NFKBIA/NR1D | 41 | 0.175213675213675 |
| GO:0002698 BP | GO:0002698 negative                  | 27/1414 | 122/18903 | 2.608264037 | 4.9557016 | 3.17570567 | TWIST1/A2M/CD55/TGFB1/A | 27 | 0.221311475409836 |
| GO:0030278 BP | GO:0030278 regulation of             | 27/1414 | 122/18903 | 2.608264037 | 4.9557016 | 3.17570567 | TWIST1/ECM1/RBPJ/LTBP3/ | 27 | 0.221311475409836 |
| GO:0097501 BP | GO:0097501 stress                    | 10/1414 | 19/18903  | 2.625315565 | 4.9719044 | 3.18608871 | MT1G/MT1M/MT1A/MT1E/MT1 | 10 | 0.526315789473684 |
| GO:0031638 BP | GO:0031638 zymogen                   | 19/1414 | 67/18903  | 2.677309226 | 5.0539626 | 3.23867316 | C1R/RUNX1/MELTF/SERPINE | 19 | 0.283582089552239 |
| GO:0032944 BP | GO:0032944 regulation of mononuclear | 42/1414 | 243/18903 | 2.743917008 | 5.1629896 | 3.30853965 | GPNMB/HES1/VCAM1/CDKN1A | 42 | 0.172839506172839 |
| GO:0030865 BP | GO:0030865 cortical                  | 18/1414 | 61/18903  | 2.846981902 | 5.3396930 | 3.42177449 | EPB41L2/TRPV4/RHOC/RHOD | 18 | 0.295081967213115 |
| GO:0010761 BP | GO:0010761 fibroblast                | 17/1414 | 55/18903  | 2.893478159 | 5.3915356 | 3.45499620 | AQP1/FGF2/TGFB1/SDC4/AR | 17 | 0.309090909090909 |
| GO:0014812 BP | GO:0014812 muscle cell               | 25/1414 | 108/18903 | 2.895899367 | 5.3915356 | 3.45499620 | PDGFRB/SIX1/TPM1/DDIT3/ | 25 | 0.231481481481481 |
| GO:0030217 BP | GO:0030217 T cell differentiat       | 48/1414 | 296/18903 | 2.902352487 | 5.3915356 | 3.45499620 | MAFB/EGR1/FOXP1/ZFP36L1 | 48 | 0.162162162162162 |
| GO:0001837 BP | GO:0001837 epithelial to             | 33/1414 | 169/18903 | 2.977151643 | 5.4609199 | 3.49945894 | COL1A1/S100A4/TWIST1/DA | 33 | 0.195266272189349 |
| GO:0002262 BP | GO:0002262 myeloid cell              | 33/1414 | 169/18903 | 2.977151643 | 5.4609199 | 3.49945894 | MAFB/ZFP36L1/HSPA1A/HSP | 33 | 0.195266272189349 |
| GO:0007568 BP | GO:0007568 aging                     | 33/1414 | 169/18903 | 2.977151643 | 5.4609199 | 3.49945894 | MMP2/FOS/PDGFRB/COMP/CR | 33 | 0.195266272189349 |
| GO:1902904 BP | GO:1902904 negative                  | 33/1414 | 169/18903 | 2.977151643 | 5.4609199 | 3.49945894 | CAPZB/LIMA1/CHADL/HSPA8 | 33 | 0.195266272189349 |
| GO:0002253 BP | GO:0002253 activation of immune      | 59/1414 | 397/18903 | 2.997688321 | 5.4813529 | 3.51255279 | THY1/C1R/FOXP1/HEXIM1/P | 59 | 0.148614609571788 |
| GO:0048705 BP | GO:0048705 skeletal                  | 40/1414 | 227/18903 | 3.108631406 | 5.6664521 | 3.63116780 | COL1A1/MMP2/COL3A1/SERP | 40 | 0.176211453744493 |
| GO:0046916 BP | GO:0046916 cellular                  | 26/1414 | 116/18903 | 3.320848493 | 6.0344265 | 3.86697261 | SLC40A1/MT1G/MT1M/MT1A/ | 26 | 0.224137931034483 |
| GO:0001659 BP | GO:0001659 temperature               | 34/1414 | 178/18903 | 3.413147709 | 6.1447193 | 3.93765026 | GJA1/EGR1/RBPJ/ACOT13/D | 34 | 0.191011235955056 |
| GO:0071772 BP | GO:0071772 response to               | 34/1414 | 178/18903 | 3.413147709 | 6.1447193 | 3.93765026 | NBL1/EGR1/FSTL1/RBPJ/FB | 34 | 0.191011235955056 |
| GO:0071773 BP | GO:0071773 cellular                  | 34/1414 | 178/18903 | 3.413147709 | 6.1447193 | 3.93765026 | NBL1/EGR1/FSTL1/RBPJ/FB | 34 | 0.191011235955056 |

|               |            |                         |         |           |                          |                        |                          |                         |    |                   |
|---------------|------------|-------------------------|---------|-----------|--------------------------|------------------------|--------------------------|-------------------------|----|-------------------|
| GO:0018108 BP | GO:0018108 | peptidyl-tyrosine       | 57/1414 | 380/18903 | 3.478019902<br>46854e-07 | 6.2422431<br>0495353e- | 4.00014531<br>940592e-06 | THY1/PDGFR/             | 57 | 0.15              |
| GO:0031341 BP | GO:0031341 | regulation of           | 24/1414 | 102/18903 | 3.607893621              | 6.4554734              | 4.13678729               | B/SH3BP5/EFEMP1/MAP2K6/ | 24 | 0.235294117647059 |
| GO:0030324 BP | GO:0030324 | lung                    | 35/1414 | 187/18903 | 3.840092902              | 6.8499271              | 4.38956056               | CADM1/LAG3/CFH/CD55/ICA | 35 | 0.18716577540107  |
| GO:0007409 BP | GO:0007409 | axonogenesis            | 63/1414 | 438/18903 | 3.906216500<br>70687e-07 | 6.9466344<br>0506804e- | 4.45153234<br>724329e-06 | COL3A1/PDGFR/PDGFRB/RS  | 63 | 0.143835616438356 |
| GO:0000302 BP | GO:0000302 | response to             | 37/1414 | 204/18903 | 4.087886202              | 7.2135520              | 4.62257814               | CDH11/THY1/ENAH/SEMA3C/ | 37 | 0.181372549019608 |
| GO:0031032 BP | GO:0031032 | actomyosin              | 37/1414 | 204/18903 | 4.087886202              | 7.2135520              | 4.62257814               | ACTB/NOTCH2/GLI3/ANOS1/ | 37 | 0.181372549019608 |
| GO:0043618 BP | GO:0043618 | regulation of           | 14/1414 | 39/18903  | 4.093409451              | 7.2135520              | 4.62257814               | COL1A1/MMP2/JUN/PDGFR/  | 37 | 0.181372549019608 |
| GO:0018212 BP | GO:0018212 | peptidyl-tyrosine       | 57/1414 | 382/18903 | 4.148194756<br>57794e-07 | 7.2880783<br>1780697e- | 4.67033594<br>819539e-06 | EPB41L2/PDGFR/PDGFRB/I  | 14 | 0.358974358974359 |
| GO:0001952 BP | GO:0001952 | regulation of           | 27/1414 | 125/18903 | 4.378245915              | 7.6691616              | 4.91454125               | JUN/EGR1/RBPJ/DDIT3/VEG | 57 | 0.149214659685864 |
| GO:0071229 BP | GO:0071229 | cellular                | 22/1414 | 89/18903  | 4.422208054              | 7.7229759              | 4.94902641               | THY1/ACTG1/RIN2/APOD/PI | 27 | 0.216             |
| GO:1903034 BP | GO:1903034 | regulation of           | 33/1414 | 172/18903 | 4.547023676              | 7.8959865              | 5.05989485               | COL1A1/MMP2/COL1A2/COL5 | 22 | 0.247191011235955 |
| GO:0060317 BP | GO:0060317 | cardiac                 | 13/1414 | 34/18903  | 4.548348176              | 7.8959865              | 5.05989485               | PDGFRA/ACTG1/FLNA/FAP/S | 33 | 0.191860465116279 |
| GO:0072012 BP | GO:0072012 | glomerulus              | 12/1414 | 29/18903  | 4.583381089              | 7.9331934              | 5.08373770               | TWIST1/RBPJ/SNAI1/BMP2/ | 13 | 0.382352941176471 |
| GO:0071222 BP | GO:0071222 | cellular                | 39/1414 | 222/18903 | 4.717251882              | 8.1407485              | 5.21674289               | EGR1/PDGFR/AQP1/PDGFRB  | 12 | 0.413793103448276 |
| GO:0030003 BP | GO:0030003 | cellular cation         | 69/1414 | 499/18903 | 4.946556550<br>75351e-07 | 8.5112874<br>2198974e- | 5.45419106<br>09302e-06  | PLCG2/ZFP36/NFKBIA/NR1D | 39 | 0.175675675675676 |
| GO:0006986 BP | GO:0006986 | response to             | 29/1414 | 141/18903 | 4.962072205              | 8.5128726              | 5.45520693               | THY1/SLC40A1/FLNA/MT1G/ | 69 | 0.138276553106212 |
| GO:0030500 BP | GO:0030500 | regulation of           | 21/1414 | 83/18903  | 5.295892378              | 9.0324386              | 5.78815445               | PLCG2/MT1M/MT1A/MT1E/MT | 29 | 0.205673758865248 |
| GO:0061515 BP | GO:0061515 | myeloid cell            | 21/1414 | 83/18903  | 5.295892378              | 9.0324386              | 5.78815445               | SERPINH1/COMP/DNAJB1/HS | 21 | 0.253012048192771 |
| GO:0010959 BP | GO:0010959 | regulation of metal ion | 61/1414 | 423/18903 | 5.450885718<br>61667e-07 | 9.2696840<br>8066794e- | 5.94018572<br>558164e-06 | TWIST1/ECM1/LTBP3/COMP/ | 21 | 0.253012048192771 |
| GO:0050777 BP | GO:0050777 | negative                | 35/1414 | 190/18903 | 5.697039988              | 9.6601262              | 6.19038831               | FOXP1/FLNA/FBN1/NOTCH2/ | 61 | 0.144208037825059 |
| GO:0044409 BP | GO:0044409 | entry into              | 31/1414 | 158/18903 | 6.048030821              | 1.0196001              | 6.53378687               | THY1/PDGFRB/FLNA/VMP1/F | 35 | 0.184210526315789 |
| GO:0097530 BP | GO:0097530 | granulocyte             | 31/1414 | 158/18903 | 6.048030821              | 1.0196001              | 6.53378687               | HL1/ANK3/PLCG2/HES1/GEM | 31 | 0.19620253164557  |
| GO:2001234 BP | GO:2001234 | negative                | 40/1414 | 233/18903 | 6.277853762              | 1.0552945              | 6.76252349               | COL3A1/PSMB4/A2M/CD55/A | 31 | 0.19620253164557  |
| GO:1901655 BP | GO:1901655 | cellular                | 24/1414 | 105/18903 | 6.374131874              | 1.0683997              | 6.84650401               | ITGB5/LGALS1/IFITM1/HSP | 31 | 0.19620253164557  |
| GO:0060485 BP | GO:0060485 | mesenchyme development  | 49/1414 | 313/18903 | 6.438835634<br>86612e-07 | 1.0761526<br>7215398e- | 6.89618619<br>798208e-06 | CD99/TRPV4/SAA1/SELENOK | 40 | 0.171673819742489 |
| GO:0030323 BP | GO:0030323 | respiratory             | 35/1414 | 191/18903 | 6.482194568              | 1.0803040              | 6.92278884               | LMNA/HSPA1A/COL2A1/HSPA | 40 | 0.171673819742489 |
| GO:1901216 BP | GO:1901216 | positive                | 22/1414 | 91/18903  | 6.677513185              | 1.1034828              | 7.07132335               | POSTN/AQP1/FOS/SPP1/CFL | 24 | 0.228571428571429 |
| GO:2000117 BP | GO:2000117 | negative                | 22/1414 | 91/18903  | 6.677513185              | 1.1034828              | 7.07132335               | COL1A1/S100A4/ZFP36L1/P | 49 | 0.156549520766773 |
| GO:0001936 BP | GO:0001936 | regulation of           | 34/1414 | 183/18903 | 6.696947463              | 1.1034828              | 7.07132335               | DGFRB/TWIST1/SEMA3C/DAB | 35 | 0.183246073298429 |
| GO:0044000 BP | GO:0044000 | movement in             | 34/1414 | 183/18903 | 6.696947463              | 1.1034828              | 7.07132335               | COL3A1/PDGFR/PDGFRB/RS  | 35 | 0.183246073298429 |
|               |            |                         |         |           |                          |                        |                          | EGR1/FOS/DDIT3/NUPR1/DD | 22 | 0.241758241758242 |
|               |            |                         |         |           |                          |                        |                          | AQP1/NR4A1/CRYAB/PTGS2/ | 22 | 0.241758241758242 |
|               |            |                         |         |           |                          |                        |                          | JUN/ECM1/CNMD/NR4A1/SPA | 34 | 0.185792349726776 |
|               |            |                         |         |           |                          |                        |                          | ITGB5/LGALS1/IFITM1/HSP | 34 | 0.185792349726776 |

|               |                                        |         |           |             |           |            |                         |    |                   |
|---------------|----------------------------------------|---------|-----------|-------------|-----------|------------|-------------------------|----|-------------------|
| GO:0001706 BP | GO:0001706 endoderm                    | 17/1414 | 58/18903  | 6.752778639 | 1.1064313 | 7.09021790 | MMP2/COL12A1/COL5A1/COL | 17 | 0.293103448275862 |
| GO:0048008 BP | GO:0048008 platelet-                   | 17/1414 | 58/18903  | 6.752778639 | 1.1064313 | 7.09021790 | PDGFRA/PDGFRB/PDGFRL/AP | 17 | 0.293103448275862 |
| GO:0046718 BP | GO:0046718 viral entry                 | 30/1414 | 151/18903 | 6.919640793 | 1.1305956 | 7.24506691 | ITGB5/LGALS1/IFITM1/HSP | 30 | 0.198675496688742 |
| GO:0030509 BP | GO:0030509 BMP signaling               | 32/1414 | 167/18903 | 6.959206366 | 1.1338840 | 7.26613990 | NBL1/EGR1/FSTL1/RBPJ/FB | 32 | 0.191616766467066 |
| GO:0035051 BP | GO:0035051 cardiocyte                  | 31/1414 | 159/18903 | 6.982985797 | 1.1345893 | 7.27065901 | PDGFRA/FOXP1/PDGFRB/TWI | 31 | 0.19496855345912  |
| GO:0046651 BP | GO:0046651 lymphocyte proliferation    | 48/1414 | 305/18903 | 7.145805384 | 1.1577966 | 7.41937613 | GPNMB/HES1/VCAM1/CDKN1A | 48 | 0.157377049180328 |
| GO:0048872 BP | GO:0048872 homeostasis of number of    | 47/1414 | 296/18903 | 7.172854007 | 1.1577966 | 7.41937613 | MAFB/ZFP36L1/FSTL1/SOX4 | 47 | 0.158783783783784 |
| GO:0032102 BP | GO:0032102 negative regulation of      | 62/1414 | 436/18903 | 7.185365963 | 1.1577966 | 7.41937613 | NBL1/PDGFRB/SOCS3/SEMA3 | 62 | 0.142201834862385 |
| GO:0031334 BP | GO:0031334 positive                    | 35/1414 | 192/18903 | 7.366989063 | 1.1837919 | 7.58595858 | PIEZ01/PLCG2/HSPA1A/HSP | 35 | 0.182291666666667 |
| GO:0071383 BP | GO:0071383 cellular                    | 37/1414 | 209/18903 | 7.582186664 | 1.2135421 | 7.77660355 | FOXP1/ZFP36L1/AQP1/DAB2 | 37 | 0.177033492822967 |
| GO:0016055 BP | GO:0016055 Wnt signaling pathway       | 64/1414 | 456/18903 | 7.593740592 | 1.2135421 | 7.77660355 | COL1A1/IGFBP4/EGR1/DKK3 | 64 | 0.140350877192982 |
| GO:0097581 BP | GO:0097581 lamellipodium               | 22/1414 | 92/18903  | 8.162775681 | 1.3009144 | 8.33650170 | CAPZB/PDPN/PIK3R1/CD44/ | 22 | 0.239130434782609 |
| GO:0042692 BP | GO:0042692 muscle cell differentiat    | 59/1414 | 409/18903 | 8.250141514 | 1.3112554 | 8.40276854 | PDGFRA/FOXP1/PDGFRB/LMN | 59 | 0.144254278728606 |
| GO:0010720 BP | GO:0010720 positive regulation of      | 48/1414 | 307/18903 | 8.670681530 | 1.3743501 | 8.80709099 | DAB2/PTPRD/FLNA/ID4/GLI | 48 | 0.156351791530945 |
| GO:0097193 BP | GO:0097193 intrinsic apoptotic         | 47/1414 | 298/18903 | 8.732254028 | 1.3803587 | 8.84559522 | CRIP1/HSPA1A/UBB/SNAI1/ | 47 | 0.157718120805369 |
| GO:0198738 BP | GO:0198738 cell-cell signaling by      | 64/1414 | 458/18903 | 8.857056769 | 1.3963030 | 8.94776915 | COL1A1/IGFBP4/EGR1/DKK3 | 64 | 0.139737991266376 |
| GO:0061041 BP | GO:0061041 regulation of               | 28/1414 | 137/18903 | 8.881033079 | 1.3963090 | 8.94780776 | PDGFRA/ACTG1/FAP/SMOC2/ | 28 | 0.204379562043796 |
| GO:0051099 BP | GO:0051099 positive                    | 33/1414 | 177/18903 | 8.964178317 | 1.4055927 | 9.00729971 | TWIST1/HES1/CTHRC1/BMP2 | 33 | 0.186440677966102 |
| GO:0036230 BP | GO:0036230 granulocyte                 | 15/1414 | 47/18903  | 9.098616900 | 1.4196594 | 9.09744146 | PLA2G2A/ANXA1/TYROBP/FC | 15 | 0.319148936170213 |
| GO:0060411 BP | GO:0060411 cardiac                     | 19/1414 | 72/18903  | 9.102565344 | 1.4196594 | 9.09744146 | SOX4/SEMA3C/RBPJ/NOTCH2 | 19 | 0.263888888888889 |
| GO:0003279 BP | GO:0003279 cardiac                     | 24/1414 | 107/18903 | 9.185780557 | 1.4250174 | 9.13177680 | SOX4/SEMA3C/RBPJ/NOTCH2 | 24 | 0.224299065420561 |
| GO:0060840 BP | GO:0060840 artery                      | 24/1414 | 107/18903 | 9.185780557 | 1.4250174 | 9.13177680 | COL3A1/PDGFRB/SOX4/SIX1 | 24 | 0.224299065420561 |
| GO:0030316 BP | GO:0030316 osteoclast                  | 23/1414 | 100/18903 | 9.656919296 | 1.4941328 | 9.57468111 | MAFB/FOXP1/FOS/KLF10/FB | 23 | 0.23              |
| GO:0010922 BP | GO:0010922 positive                    | 13/1414 | 36/18903  | 9.831099439 | 1.5170582 | 9.72159123 | PDGFRB/MAGI2/BMP2/CALM2 | 13 | 0.361111111111111 |
| GO:0071621 BP | GO:0071621 granulocyte                 | 27/1414 | 130/18903 | 9.943425924 | 1.5270384 | 9.78554604 | TRPV4/SAA1/PDE4B/ANXA1/ | 27 | 0.207692307692308 |
| GO:0030111 BP | GO:0030111 regulation of Wnt signaling | 51/1414 | 336/18903 | 9.948133261 | 1.5270384 | 9.78554604 | COL1A1/IGFBP4/EGR1/DKK3 | 51 | 0.151785714285714 |
| GO:0033631 BP | GO:0033631 cell-cell                   | 9/1414  | 17/18903  | 1.001690992 | 1.5335599 | 9.82733724 | PIEZ01/ITGA5/FERMT3/ADA | 9  | 0.529411764705882 |

|               |                                 |         |           |             |           |            |                         |                      |
|---------------|---------------------------------|---------|-----------|-------------|-----------|------------|-------------------------|----------------------|
| GO:0031098 BP | GO:0031098 stress-              | 41/1414 | 246/18903 | 1.014989923 | 1.5498524 | 9.93174213 | ZFP36L1/MAP2K6/FOXO1/GA | 41 0.166666666666667 |
| GO:0010517 BP | GO:0010517 regulation of        | 18/1414 | 66/18903  | 1.037000085 | 1.5793267 | 1.01206192 | PDGFRA/PDGFBR/FGFR1/FGF | 18 0.272727272727273 |
| GO:0051894 BP | GO:0051894 positive             | 11/1414 | 26/18903  | 1.065914991 | 1.6191359 | 1.03757240 | THY1/SDC4/VEGFA/NRP1/RA | 11 0.423076923076923 |
| GO:1990778 BP | GO:1990778 protein localization | 51/1414 | 337/18903 | 1.088983554 | 1.6498807 | 1.05727425 | EPB41L2/DAB2/ACTB/FLNA/ | 51 0.1513353115727   |
| GO:0001892 BP | GO:0001892 embryonic            | 21/1414 | 87/18903  | 1.224671106 | 1.8414983 | 1.18006635 | SOCS3/ZFP36L1/RBPJ/HES1 | 21 0.241379310344828 |
| GO:0045598 BP | GO:0045598 regulation of        | 29/1414 | 147/18903 | 1.228086512 | 1.8414983 | 1.18006635 | ZFP36L1/SIX1/ID4/FOXO1/ | 29 0.197278911564626 |
| GO:0106106 BP | GO:0106106 cold-induced         | 29/1414 | 147/18903 | 1.228086512 | 1.8414983 | 1.18006635 | GJA1/RBPJ/ACOT13/DIO2/M | 29 0.197278911564626 |
| GO:0120161 BP | GO:0120161 regulation of        | 29/1414 | 147/18903 | 1.228086512 | 1.8414983 | 1.18006635 | GJA1/RBPJ/ACOT13/DIO2/M | 29 0.197278911564626 |
| GO:0030308 BP | GO:0030308 negative             | 34/1414 | 188/18903 | 1.274087461 | 1.9055774 | 1.22112944 | GJA1/FOXP1/SEMA3C/DAB2/ | 34 0.180851063829787 |
| GO:0002449 BP | GO:0002449 lymphocyte mediated  | 54/1414 | 367/18903 | 1.293351104 | 1.9278949 | 1.23543090 | CADM1/C1R/TUBB/LAG3/TUB | 54 0.147138964577657 |
| GO:0050730 BP | GO:0050730 regulation of        | 43/1414 | 266/18903 | 1.295619456 | 1.9278949 | 1.23543090 | THY1/SOCS3/SH3BP5/PLCG2 | 43 0.161654135338346 |
| GO:0030038 BP | GO:0030038 contractile          | 24/1414 | 109/18903 | 1.309740522 | 1.9341054 | 1.23941068 | ITGB5/ACTG1/TPM1/PIK3R1 | 24 0.220183486238532 |
| GO:0043149 BP | GO:0043149 stress fiber         | 24/1414 | 109/18903 | 1.309740522 | 1.9341054 | 1.23941068 | ITGB5/ACTG1/TPM1/PIK3R1 | 24 0.220183486238532 |
| GO:1903557 BP | GO:1903557 positive             | 24/1414 | 109/18903 | 1.309740522 | 1.9341054 | 1.23941068 | TWIST1/PLCG2/PIK3R1/SEL | 24 0.220183486238532 |
| GO:0031669 BP | GO:0031669 cellular             | 39/1414 | 231/18903 | 1.329328357 | 1.9580738 | 1.25477006 | COL1A1/POSTN/FOS/KLF10/ | 39 0.168831168831169 |
| GO:0032943 BP | GO:0032943 mononuclear cell     | 48/1414 | 312/18903 | 1.391673999 | 2.0447441 | 1.31031005 | GPMB/HES1/VCAM1/CDKN1A  | 48 0.153846153846154 |
| GO:0071276 BP | GO:0071276 cellular             | 13/1414 | 37/18903  | 1.412136033 | 2.0695953 | 1.32623513 | JUN/FOS/MT1G/MT1M/MT1A/ | 13 0.351351351351351 |
| GO:0072659 BP | GO:0072659 protein localization | 45/1414 | 285/18903 | 1.437322717 | 2.1002627 | 1.34588737 | DAB2/ACTB/FLNA/ANK3/PIK | 45 0.157894736842105 |
| GO:0071706 BP | GO:0071706 tumor                | 34/1414 | 189/18903 | 1.443863127 | 2.1002627 | 1.34588737 | 3R1/SQSTM1/TGFB1/ATP1B3 | 34 0.17989417989418  |
| GO:1903555 BP | GO:1903555 regulation of        | 34/1414 | 189/18903 | 1.443863127 | 2.1002627 | 1.34588737 | FOXP1/TWIST1/GPNMB/PLCG | 34 0.17989417989418  |
| GO:0010811 BP | GO:0010811 positive             | 26/1414 | 125/18903 | 1.523154724 | 2.2100899 | 1.41626667 | FOXP1/TWIST1/GPNMB/PLCG | 26 0.2               |
| GO:0070302 BP | GO:0070302 regulation of        | 35/1414 | 198/18903 | 1.550306589 | 2.2439052 | 1.43793618 | THY1/DAB2/RIN2/FLNA/ABI | 35 0.176767676767677 |
| GO:0010975 BP | GO:0010975 regulation of neuron | 62/1414 | 446/18903 | 1.561077307 | 2.2539019 | 1.44434224 | THY1/SEMA3C/DAB2/PTPRD/ | 62 0.139013452914798 |
| GO:0003179 BP | GO:0003179 heart valve          | 16/1414 | 55/18903  | 1.601712251 | 2.3011792 | 1.47463837 | PRRX1/FLNA/DPYSL3/NTN1/ | 16 0.290909090909091 |
| GO:0071385 BP | GO:0071385 cellular             | 16/1414 | 55/18903  | 1.601712251 | 2.3011792 | 1.47463837 | TWIST1/SOX4/NOTCH2/SNAI | 16 0.290909090909091 |
| GO:0035987 BP | GO:0035987 endodermal           | 15/1414 | 49/18903  | 1.653893369 | 2.3703095 | 1.51893840 | ZFP36L1/AQP1/ZFP36/CFLA | 15 0.306122448979592 |
| GO:0045639 BP | GO:0045639 positive             | 23/1414 | 103/18903 | 1.672237455 | 2.3907257 | 1.53202146 | MMP2/COL12A1/COL5A1/COL | 23 0.223300970873786 |
| GO:0031639 BP | GO:0031639 plasminogen          | 11/1414 | 27/18903  | 1.677197961 | 2.3919549 | 1.53280915 | ZFP36L1/FOS/KLF10/RUNX1 | 11 0.407407407407407 |
| GO:0001935 BP | GO:0001935 endothelial          | 35/1414 | 199/18903 | 1.748277427 | 2.4872444 | 1.59387243 | RUNX1/MELTF/SERPINE2/AN | 35 0.175879396984925 |
| GO:0045669 BP | GO:0045669 positive             | 19/1414 | 75/18903  | 1.786416518 | 2.5353205 | 1.62468051 | JUN/ECM1/CNMD/NR4A1/SPA | 19 0.253333333333333 |
| GO:0061687 BP | GO:0061687 detoxificatio        | 9/1414  | 18/18903  | 1.870059636 | 2.6475868 | 1.69662283 | GLI3/IFITM1/CTHRC1/GDF1 | 9 0.5                |
|               |                                 |         |           |             |           |            | MT1G/MT1M/MT1A/MT1E/MT1 |                      |

|               |                             |         |           |             |           |            |                         |    |                   |
|---------------|-----------------------------|---------|-----------|-------------|-----------|------------|-------------------------|----|-------------------|
| GO:0032233 BP | GO:0032233 positive         | 17/1414 | 62/18903  | 1.897807853 | 2.6803663 | 1.71762856 | TPM1/RHOC/SDC4/LPAR1/RG | 17 | 0.274193548387097 |
| GO:0009267 BP | GO:0009267 cellular         | 32/1414 | 175/18903 | 2.023466248 | 2.8509368 | 1.82693329 | FOS/KLF10/CTSK/LAMP2/FO | 32 | 0.182857142857143 |
| GO:0043523 BP | GO:0043523 regulation of    | 37/1414 | 218/18903 | 2.163816943 | 3.0413359 | 1.94894456 | JUN/SIX1/RETREG1/DDIT3/ | 37 | 0.169724770642202 |
| GO:0032640 BP | GO:0032640 tumor            | 33/1414 | 184/18903 | 2.198027741 | 3.0746033 | 1.97026290 | FOXP1/TWIST1/GPNMB/PLCG | 33 | 0.179347826086957 |
| GO:0032680 BP | GO:0032680 regulation of    | 33/1414 | 184/18903 | 2.198027741 | 3.0746033 | 1.97026290 | FOXP1/TWIST1/GPNMB/PLCG | 33 | 0.179347826086957 |
| GO:0051591 BP | GO:0051591 response to      | 21/1414 | 90/18903  | 2.210672411 | 3.0775303 | 1.97213860 | COL1A1/FOSB/ZFP36L1/AQP | 21 | 0.233333333333333 |
| GO:0060191 BP | GO:0060191 regulation of    | 21/1414 | 90/18903  | 2.210672411 | 3.0775303 | 1.97213860 | PDGFRA/PDGFRB/FGFR1/ANG | 21 | 0.233333333333333 |
| GO:0045619 BP | GO:0045619 regulation of    | 36/1414 | 210/18903 | 2.327252889 | 3.2321109 | 2.07119674 | ZFP36L1/SOX4/ACTB/RUNX1 | 36 | 0.171428571428571 |
| GO:0032760 BP | GO:0032760 positive         | 23/1414 | 105/18903 | 2.378248620 | 3.2950888 | 2.11155415 | TWIST1/PLCG2/PIK3R1/SEL | 23 | 0.219047619047619 |
| GO:0031663 BP | GO:0031663 lipopolysacch    | 17/1414 | 63/18903  | 2.419436043 | 3.3442110 | 2.14303252 | PLCG2/NFKBIA/CD55/TGFB1 | 17 | 0.26984126984127  |
| GO:0007043 BP | GO:0007043 cell-cell        | 29/1414 | 152/18903 | 2.496692937 | 3.4428392 | 2.20623531 | CDH11/GJA1/ACTG1/ACTB/S | 29 | 0.190789473684211 |
| GO:0060349 BP | GO:0060349 bone             | 22/1414 | 98/18903  | 2.545322779 | 3.5016197 | 2.24390297 | COL1A1/COL3A1/SERPINH1/ | 22 | 0.224489795918367 |
| GO:0019058 BP | GO:0019058 viral life cycle | 48/1414 | 319/18903 | 2.634618864 | 3.6159369 | 2.31715952 | ITGB5/LGALS1/IFITM1/HSP | 48 | 0.150470219435737 |
|               |                             |         |           | 59267e-06   | 028633e-  | 648138e-05 | A1A/HSPA1B/HSPA8/WWP2/G |    |                   |
| GO:0051701 BP | GO:0051701 biological       | 35/1414 | 203/18903 | 2.797858644 | 3.8309646 | 2.45495331 | ITGB5/LGALS1/IFITM1/HSP | 35 | 0.172413793103448 |
| GO:0043405 BP | GO:0043405 regulation of    | 33/1414 | 186/18903 | 2.809576203 | 3.8379995 | 2.45946138 | PDGFRB/TNXB/MAP2K6/DNAJ | 33 | 0.17741935483871  |
| GO:0030835 BP | GO:0030835 negative         | 14/1414 | 45/18903  | 2.957057175 | 4.0112824 | 2.57050429 | CAPZB/LIMA1/SCIN/GSN/TW | 14 | 0.311111111111111 |
| GO:0043620 BP | GO:0043620 regulation of    | 14/1414 | 45/18903  | 2.957057175 | 4.0112824 | 2.57050429 | JUN/EGR1/RBPJ/DDIT3/VEG | 14 | 0.311111111111111 |
| GO:1900744 BP | GO:1900744 regulation of    | 14/1414 | 45/18903  | 2.957057175 | 4.0112824 | 2.57050429 | GADD45B/GADD45G/BMP2/VE | 14 | 0.311111111111111 |
| GO:0009408 BP | GO:0009408 response to      | 24/1414 | 114/18903 | 3.043346068 | 4.1187558 | 2.63937523 | IGFBP7/DNAJB1/HSPA1A/HS | 24 | 0.210526315789474 |
| GO:0035306 BP | GO:0035306 positive         | 17/1414 | 64/18903  | 3.066793310 | 4.1313176 | 2.64742507 | PDGFRB/MAGI2/BMP2/CAMTA | 17 | 0.265625          |
| GO:0071384 BP | GO:0071384 cellular         | 17/1414 | 64/18903  | 3.066793310 | 4.1313176 | 2.64742507 | ZFP36L1/AQP1/ZFP36/CFLA | 17 | 0.265625          |
| GO:0002548 BP | GO:0002548 monocyte         | 18/1414 | 71/18903  | 3.285032144 | 4.4151134 | 2.82928671 | NBL1/ANXA1/CCL20/AIF1/C | 18 | 0.253521126760563 |
| GO:1990266 BP | GO:1990266 neutrophil       | 26/1414 | 130/18903 | 3.295359571 | 4.4188120 | 2.83165682 | CD99/SAA1/SELENOK/PDE4B | 26 | 0.2               |
| GO:0036003 BP | GO:0036003 positive         | 9/1414  | 19/18903  | 3.316834908 | 4.4374078 | 2.84357333 | RBPJ/DDIT3/VEGFA/CEBPB/ | 9  | 0.473684210526316 |
| GO:0032743 BP | GO:0032743 positive         | 12/1414 | 34/18903  | 3.406520082 | 4.5469637 | 2.91377883 | RUNX1/PLCG2/PNP/PDE4B/A | 12 | 0.352941176470588 |
| GO:0031529 BP | GO:0031529 ruffle           | 16/1414 | 58/18903  | 3.474498470 | 4.6271117 | 2.96513916 | LIMA1/TPM1/CSPG4/ICAM1/ | 16 | 0.275862068965517 |
| GO:0045088 BP | GO:0045088 regulation of    | 39/1414 | 240/18903 | 3.490760797 | 4.6381794 | 2.97223152 | CADM1/HEXIM1/LAG3/PLCG2 | 39 | 0.1625            |
| GO:0046634 BP | GO:0046634 regulation of    | 24/1414 | 115/18903 | 3.576842530 | 4.7417551 | 3.03860474 | RUNX1/GLI3/JUNB/ZBTB16/ | 24 | 0.208695652173913 |
| GO:0035966 BP | GO:0035966 response to      | 30/1414 | 163/18903 | 3.642473620 | 4.8178114 | 3.08734307 | SERPINH1/COMP/DNAJB1/HS | 30 | 0.184049079754601 |
| GO:0010543 BP | GO:0010543 regulation of    | 15/1414 | 52/18903  | 3.799195868 | 5.0137351 | 3.21289462 | PDGFRA/FLNA/PDPN/SERPIN | 15 | 0.288461538461538 |
| GO:0010273 BP | GO:0010273 detoxificatio    | 8/1414  | 15/18903  | 3.840963641 | 5.0334756 | 3.22554470 | MT1G/MT1M/MT1A/MT1E/MT1 | 8  | 0.533333333333333 |
| GO:1990169 BP | GO:1990169 stress           | 8/1414  | 15/18903  | 3.840963641 | 5.0334756 | 3.22554470 | MT1G/MT1M/MT1A/MT1E/MT1 | 8  | 0.533333333333333 |
| GO:2001028 BP | GO:2001028 positive         | 8/1414  | 15/18903  | 3.840963641 | 5.0334756 | 3.22554470 | SMOC2/FGFR1/FGF2/VEGFA/ | 8  | 0.533333333333333 |
| GO:0048246 BP | GO:0048246 macrophage       | 13/1414 | 40/18903  | 3.858693334 | 5.0334756 | 3.22554470 | MMP2/TRPV4/SAA1/CSF1R/C | 13 | 0.325             |
| GO:0003170 BP | GO:0003170 heart valve      | 17/1414 | 65/18903  | 3.865930238 | 5.0334756 | 3.22554470 | TWIST1/SOX4/RBPJ/NOTCH2 | 17 | 0.261538461538462 |

|               |                          |         |           |             |           |            |                         |                      |
|---------------|--------------------------|---------|-----------|-------------|-----------|------------|-------------------------|----------------------|
| GO:0048247 BP | GO:0048247 lymphocyte    | 17/1414 | 65/18903  | 3.865930238 | 5.0334756 | 3.22554470 | SAA1/CCL20/CCL3/GPR183/ | 17 0.261538461538462 |
| GO:2001026 BP | GO:2001026 regulation of | 10/1414 | 24/18903  | 3.937996136 | 5.1158867 | 3.27835524 | SMOC2/FGFR1/FGF2/FGF1/V | 10 0.416666666666667 |
| GO:0048844 BP | GO:0048844 artery        | 19/1414 | 79/18903  | 4.127352806 | 5.3499664 | 3.42835785 | COL3A1/PDGFRB/SOX4/SIX1 | 19 0.240506329113924 |
| GO:0030042 BP | GO:0030042 actin         | 16/1414 | 59/18903  | 4.438800926 | 5.7409148 | 3.67888483 | CAPZB/LIMA1/SCIN/GSN/PL | 16 0.271186440677966 |
| GO:0034599 BP | GO:0034599 cellular      | 44/1414 | 288/18903 | 4.547502621 | 5.8684917 | 3.76063852 | MMP2/JUN/PDGFRB/FOXP1/A | 44 0.152777777777778 |
| GO:0035304 BP | GO:0035304 regulation of | 21/1414 | 94/18903  | 4.639524566 | 5.9608693 | 3.81983578 | PDGFRB/RCAN1/MAGI2/CAMT | 21 0.223404255319149 |
| GO:0051492 BP | GO:0051492 regulation of | 21/1414 | 94/18903  | 4.639524566 | 5.9608693 | 3.81983578 | ACTG1/TPM1/PIK3R1/RHOC/ | 21 0.223404255319149 |
| GO:0072577 BP | GO:0072577 endothelial   | 17/1414 | 66/18903  | 4.847395802 | 6.2142548 | 3.98220994 | ANGPTL4/ICAM1/RGCC/NDNF | 17 0.257575757575758 |
| GO:0001910 BP | GO:0001910 regulation of | 20/1414 | 87/18903  | 4.891532836 | 6.2570857 | 4.00965676 | CADM1/LAG3/ICAM1/HLA-   | 20 0.229885057471264 |
| GO:0046638 BP | GO:0046638 positive      | 15/1414 | 53/18903  | 4.934885389 | 6.2987278 | 4.03634182 | RUNX1/GLI3/ZBTB16/PNP/A | 15 0.283018867924528 |
| GO:0046637 BP | GO:0046637 regulation of | 18/1414 | 73/18903  | 5.036068167 | 6.3874490 | 4.09319597 | RUNX1/GLI3/JUNB/ZBTB16/ | 18 0.246575342465753 |
| GO:0061035 BP | GO:0061035 regulation of | 18/1414 | 73/18903  | 5.036068167 | 6.3874490 | 4.09319597 | CTSK/GLI3/EFEMP1/LTBP3/ | 18 0.246575342465753 |
| GO:0071230 BP | GO:0071230 cellular      | 19/1414 | 80/18903  | 5.037247647 | 6.3874490 | 4.09319597 | COL1A1/MMP2/COL1A2/COL5 | 19 0.2375            |
| GO:0046631 BP | GO:0046631 alpha-beta T  | 31/1414 | 174/18903 | 5.090906784 | 6.4414879 | 4.12782509 | FOXP1/RUNX1/GLI3/JUNB/Z | 31 0.17816091954023  |
| GO:0061383 BP | GO:0061383 trabecula     | 14/1414 | 47/18903  | 5.253589208 | 6.6045522 | 4.23231974 | COL1A1/MMP2/RBPJ/SLC40A | 14 0.297872340425532 |
| GO:0006458 BP | GO:0006458 'de novo'     | 13/1414 | 41/18903  | 5.265072513 | 6.6045522 | 4.23231974 | DNAJB1/HSPA1A/HSPA1B/HS | 13 0.317073170731707 |
| GO:0042119 BP | GO:0042119 neutrophil    | 13/1414 | 41/18903  | 5.265072513 | 6.6045522 | 4.23231974 | PLA2G2A/ANXA1/TYROBP/FC | 13 0.317073170731707 |
| GO:0046688 BP | GO:0046688 response to   | 13/1414 | 41/18903  | 5.265072513 | 6.6045522 | 4.23231974 | AQP1/MT1G/MT1M/MT1A/MT1 | 13 0.317073170731707 |
| GO:0043393 BP | GO:0043393 regulation of | 34/1414 | 200/18903 | 5.314469349 | 6.6522102 | 4.26285987 | DAB2/ACTB/CDON/CTHRC1/S | 34 0.17              |
| GO:0014909 BP | GO:0014909 smooth muscle | 21/1414 | 95/18903  | 5.541306407 | 6.9065043 | 4.42581625 | PDGFRB/TPM1/DDIT3/S100A | 21 0.221052631578947 |
| GO:1990874 BP | GO:1990874 vascular      | 21/1414 | 95/18903  | 5.541306407 | 6.9065043 | 4.42581625 | MMP2/GJA1/JUN/TPM1/DDIT | 21 0.221052631578947 |
| GO:1901798 BP | GO:1901798 positive      | 11/1414 | 30/18903  | 5.698289723 | 7.0870200 | 4.54149406 | HEXIM1/UBB/RPS20/PMAIP1 | 11 0.366666666666667 |
| GO:0043535 BP | GO:0043535 regulation of | 28/1414 | 150/18903 | 5.737914394 | 7.1211180 | 4.56334468 | FGFR1/ETS1/FGF2/TGFB1/P | 28 0.186666666666667 |
| GO:0031579 BP | GO:0031579 membrane raft | 10/1414 | 25/18903  | 6.123635183 | 7.5836866 | 4.85976724 | GSN/ANXA2/CAV1/PTPRC/DO | 10 0.4               |
| GO:0042063 BP | GO:0042063 gliogenesis   | 46/1414 | 310/18903 | 6.169764582 | 7.6246264 | 4.88600223 | COL3A1/MXRA8/SOX4/ID4/G | 46 0.148387096774194 |
| GO:0035924 BP | GO:0035924 cellular      | 18/1414 | 74/18903  | 6.194048692 | 7.6384537 | 4.89486300 | PDGFRA/PDGFRB/GAS1/SMOC | 18 0.243243243243243 |
| GO:0030834 BP | GO:0030834 regulation of | 15/1414 | 54/18903  | 6.363713036 | 7.8146396 | 5.00776620 | CAPZB/LIMA1/SCIN/GSN/PL | 15 0.277777777777778 |
| GO:0050819 BP | GO:0050819 negative      | 15/1414 | 54/18903  | 6.363713036 | 7.8146396 | 5.00776620 | PDGFRA/FAP/PROCR/SERPIN | 15 0.277777777777778 |
| GO:0051402 BP | GO:0051402 neuron        | 40/1414 | 255/18903 | 6.377726064 | 7.8153941 | 5.00824972 | JUN/SIX1/RETREG1/DDIT3/ | 40 0.156862745098039 |
| GO:0034446 BP | GO:0034446 substrate     | 23/1414 | 111/18903 | 6.433961504 | 7.8513174 | 5.03127005 | ANTXR1/DAB2/FLNA/MELTF/ | 23 0.207207207207207 |
| GO:1901222 BP | GO:1901222 regulation of | 23/1414 | 111/18903 | 6.433961504 | 7.8513174 | 5.03127005 | NFKBIA/PRDX1/RPS3/BIRC2 | 23 0.207207207207207 |
| GO:0032635 BP | GO:0032635 interleukin-6 | 31/1414 | 176/18903 | 6.489380828 | 7.8859496 | 5.05346300 | TWIST1/PLCG2/TRPV4/SELE | 31 0.176136363636364 |
| GO:0032675 BP | GO:0032675 regulation of | 31/1414 | 176/18903 | 6.489380828 | 7.8859496 | 5.05346300 | TWIST1/PLCG2/TRPV4/SELE | 31 0.176136363636364 |
| GO:0042594 BP | GO:0042594 response to   | 35/1414 | 211/18903 | 6.829672880 | 8.2822207 | 5.30740089 | FOS/KLF10/CTSK/LAMP2/FO | 35 0.165876777251185 |
| GO:0002040 BP | GO:0002040 sprouting     | 32/1414 | 185/18903 | 6.862262076 | 8.3044760 | 5.32166251 | PIK3R3/S100A1/NR4A1/FGF | 32 0.172972972972973 |
| GO:0071902 BP | GO:0071902 positive      | 37/1414 | 229/18903 | 7.043329503 | 8.5059505 | 5.45077107 | PDGFRB/MAP2K6/FGFR1/BMP | 37 0.161572052401747 |

|               |                                   |         |           |             |           |            |                                                |    |                    |
|---------------|-----------------------------------|---------|-----------|-------------|-----------|------------|------------------------------------------------|----|--------------------|
| GO:0048678 BP | GO:0048678 response to            | 20/1414 | 89/18903  | 7.069324292 | 8.5197042 | 5.45958472 | MMP2/TNC/JUN/THY1/FLNA/                        | 20 | 0.224719101123595  |
| GO:2000249 BP | GO:2000249 regulation of          | 13/1414 | 42/18903  | 7.105715917 | 8.5283211 | 5.46510661 | PDGFRA/NOTCH2/CSF1R/GMF                        | 13 | 0.30952380952381   |
| GO:2000403 BP | GO:2000403 positive               | 13/1414 | 42/18903  | 7.105715917 | 8.5283211 | 5.46510661 | SELENOK/CCL20/AIF1/CCL3                        | 13 | 0.30952380952381   |
| GO:0097084 BP | GO:0097084 vascular               | 7/1414  | 12/18903  | 7.314873375 | 8.7613257 | 5.61442026 | SGCB/COMP/HES1/VEGFA/AD                        | 7  | 0.5833333333333333 |
| GO:0002704 BP | GO:0002704 negative               | 17/1414 | 68/18903  | 7.505735881 | 8.9531610 | 5.73735187 | CD55/RABGEF1/PTPRC/BST2                        | 17 | 0.25               |
| GO:0060193 BP | GO:0060193 positive               | 17/1414 | 68/18903  | 7.505735881 | 8.9531610 | 5.73735187 | PDGFRA/PDGFRB/FGFR1/FGF                        | 17 | 0.25               |
| GO:0043536 BP | GO:0043536 positive               | 18/1414 | 75/18903  | 7.585932536 | 9.0119642 | 5.77503407 | FGFR1/ETS1/FGF2/TGFB1/P                        | 18 | 0.24               |
| GO:0050818 BP | GO:0050818 regulation of          | 18/1414 | 75/18903  | 7.585932536 | 9.0119642 | 5.77503407 | PDGFRA/FAP/PROCR/SERPIN                        | 18 | 0.24               |
| GO:0051403 BP | GO:0051403 stress-                | 38/1414 | 239/18903 | 7.821639214 | 9.2730938 | 5.94237074 | ZFP36L1/MAP2K6/FOXO1/GA                        | 38 | 0.158995815899582  |
| GO:0032872 BP | GO:0032872 regulation of          | 33/1414 | 195/18903 | 8.024220380 | 9.4939710 | 6.08391300 | FOXO1/GADD45B/GADD45G/D                        | 33 | 0.169230769230769  |
| GO:0051051 BP | GO:0051051 negative regulation of | 63/1414 | 479/18903 | 8.121525288 | 9.5896471 | 6.14522401 | GJA1/TWIST1/ANK3/FOXO1/HES1/GEM/CRYAB/WWP2/APO | 63 | 0.131524008350731  |
| GO:0010518 BP | GO:0010518 positive               | 15/1414 | 55/18903  | 8.149463331 | 9.6031958 | 6.15390628 | PDGFRA/PDGFRB/FGFR1/FGF                        | 15 | 0.272727272727273  |
| GO:1901796 BP | GO:1901796 regulation of          | 22/1414 | 105/18903 | 8.410676737 | 9.8910236 | 6.33835167 | TWIST1/SOX4/HEXIM1/MAP2                        | 22 | 0.20952380952381   |
| GO:0033673 BP | GO:0033673 negative               | 38/1414 | 240/18903 | 8.636358916 | 0.0001013 | 6.49533210 | THY1/HEXIM1/SH3BP5/GADD                        | 38 | 0.1583333333333333 |
| GO:0043030 BP | GO:0043030 regulation of          | 16/1414 | 62/18903  | 8.927848429 | 0.0001045 | 6.70107583 | NR1D1/JUND/HSPD1/CD74/P                        | 16 | 0.258064516129032  |
| GO:0071498 BP | GO:0071498 cellular               | 9/1414  | 21/18903  | 9.198122726 | 0.0001073 | 6.87632290 | MMP2/PTGS2/KLF2/KLF4/MT                        | 9  | 0.428571428571429  |
| GO:1901522 BP | GO:1901522 positive               | 9/1414  | 21/18903  | 9.198122726 | 0.0001073 | 6.87632290 | JUN/RBPJ/DLX5/BMP2/XBP1                        | 9  | 0.428571428571429  |
| GO:0045580 BP | GO:0045580 regulation of          | 31/1414 | 179/18903 | 9.256059529 | 0.0001076 | 6.89534356 | SOX4/ACTB/RUNX1/ZEB1/GL                        | 31 | 0.173184357541899  |
| GO:2000401 BP | GO:2000401 regulation of          | 17/1414 | 69/18903  | 9.272009086 | 0.0001076 | 6.89534356 | ECM1/APOD/SELENOK/CCL20                        | 17 | 0.246376811594203  |
| GO:0032642 BP | GO:0032642 regulation of          | 21/1414 | 98/18903  | 9.278907128 | 0.0001076 | 6.89534356 | EGR1/FOXP1/TWIST1/APOD/                        | 21 | 0.214285714285714  |
| GO:0031952 BP | GO:0031952 regulation of          | 13/1414 | 43/18903  | 9.491203821 | 0.0001098 | 7.03911127 | JUN/GPNMB/CALM2/CAV1/VE                        | 13 | 0.302325581395349  |
| GO:0002703 BP | GO:0002703 regulation of          | 38/1414 | 241/18903 | 9.528557642 | 0.0001100 | 7.05282088 | CADM1/LAG3/PLCG2/CD55/T                        | 38 | 0.157676348547718  |
| GO:0098754 BP | GO:0098754 detoxificatio          | 28/1414 | 154/18903 | 9.653911580 | 0.0001112 | 7.13148325 | GPX8/H19/MT1G/PRDX4/MT1                        | 28 | 0.181818181818182  |
| GO:0061138 BP | GO:0061138 morphogenesis          | 32/1414 | 188/18903 | 9.679371259 | 0.0001113 | 7.13618755 | SOCS3/SEMA3C/SIX1/RSP02                        | 32 | 0.170212765957447  |
| GO:0030593 BP | GO:0030593 neutrophil             | 22/1414 | 106/18903 | 9.873604507 | 0.0001129 | 7.23838793 | SAA1/PDE4B/CCL20/TNFAIP                        | 22 | 0.207547169811321  |
| GO:0042102 BP | GO:0042102 positive               | 22/1414 | 106/18903 | 9.873604507 | 0.0001129 | 7.23838793 | HES1/VCAM1/PNP/SELENOK/                        | 22 | 0.207547169811321  |
| GO:0031647 BP | GO:0031647 regulation of protein  | 47/1414 | 325/18903 | 9.876088298 | 0.0001129 | 7.23838793 | LMNA/SOX4/FLNA/LAMP2/HS                        | 47 | 0.144615384615385  |
| GO:1903707 BP | GO:1903707 negative               | 23/1414 | 114/18903 | 1.024957541 | 0.0001169 | 7.49742348 | MAFB/FBN1/RUNX1/GLI3/LA                        | 23 | 0.201754385964912  |
| GO:0042542 BP | GO:0042542 response to            | 25/1414 | 130/18903 | 1.042678460 | 0.0001187 | 7.61215299 | COL1A1/MMP2/FOXP1/AQP1/                        | 25 | 0.192307692307692  |
| GO:0031397 BP | GO:0031397 negative               | 19/1414 | 84/18903  | 1.076836127 | 0.0001224 | 7.84619901 | SOX4/HSPA1A/HSPA1B/DNAJ                        | 19 | 0.226190476190476  |
| GO:0030512 BP | GO:0030512 negative               | 21/1414 | 99/18903  | 1.095750364 | 0.0001241 | 7.95300877 | LTBP1/FBN1/ASPN/HTRA1/H                        | 21 | 0.212121212121212  |
| GO:0032602 BP | GO:0032602 chemokine              | 21/1414 | 99/18903  | 1.095750364 | 0.0001241 | 7.95300877 | EGR1/FOXP1/TWIST1/APOD/                        | 21 | 0.212121212121212  |
| GO:0003018 BP | GO:0003018 vascular               | 41/1414 | 270/18903 | 1.103602643 | 0.0001247 | 7.99447774 | MMP2/COMP/TRPV4/SLC29A1                        | 41 | 0.151851851851852  |
| GO:2001242 BP | GO:2001242 regulation of          | 30/1414 | 172/18903 | 1.110161953 | 0.0001252 | 8.02520297 | HSPA1A/UBB/SNAI1/DDIT3/                        | 30 | 0.174418604651163  |

|               |                               |         |           |             |           |            |                                                |                      |
|---------------|-------------------------------|---------|-----------|-------------|-----------|------------|------------------------------------------------|----------------------|
| GO:0051604 BP | GO:0051604 protein maturation | 48/1414 | 336/18903 | 1.112138097 | 0.0001252 | 8.02520297 | MAFB/SERPINH1/C1R/SOX4/FLNA/RUNX1/GAS1/GLI3/PC | 48 0.142857142857143 |
| GO:0002699 BP | GO:0002699 positive           | 40/1414 | 261/18903 | 1.126211619 | 0.0001265 | 8.11109919 | CADM1/LAG3/PLCG2/RBP4/X                        | 40 0.153256704980843 |
| GO:0002285 BP | GO:0002285 lymphocyte         | 34/1414 | 207/18903 | 1.141477693 | 0.0001280 | 8.20514493 | FOXP1/LGALS1/NOTCH2/PLC                        | 34 0.164251207729469 |
| GO:0043270 BP | GO:0043270 positive           | 43/1414 | 289/18903 | 1.143659950 | 0.0001280 | 8.20514493 | THY1/PDGFRB/ACTB/FLNA/V                        | 43 0.14878892733564  |
| GO:0006469 BP | GO:0006469 negative           | 35/1414 | 216/18903 | 1.157030295 | 0.0001292 | 8.28516753 | THY1/HEXIM1/SH3BP5/GADD                        | 35 0.162037037037037 |
| GO:0009743 BP | GO:0009743 response to        | 37/1414 | 234/18903 | 1.164168491 | 0.0001298 | 8.32034278 | EGR1/ZFP36L1/SOX4/COL6A                        | 37 0.158119658119658 |
| GO:0043552 BP | GO:0043552 positive           | 11/1414 | 32/18903  | 1.170579127 | 0.0001303 | 8.35019381 | PDGFRA/PDGFRB/FGF2/TGFB                        | 11 0.34375           |
| GO:0030856 BP | GO:0030856 regulation of      | 29/1414 | 164/18903 | 1.178196023 | 0.0001309 | 8.38851945 | ZFP36L1/ZEB1/HES1/ZFP36                        | 29 0.176829268292683 |
| GO:0072507 BP | GO:0072507 divalent inorganic | 50/1414 | 356/18903 | 1.180722166 | 0.0001309 | 8.39052314 | THY1/FLNA/NT5E/ANK3/MT1                        | 50 0.140449438202247 |
| GO:0014911 BP | GO:0014911 positive           | 13/1414 | 44/18903  | 1.255430722 | 0.0001386 | 8.88762857 | PDGFRB/S100A11/LPAR1/AI                        | 13 0.295454545454545 |
| GO:0021762 BP | GO:0021762 substantia         | 13/1414 | 44/18903  | 1.255430722 | 0.0001386 | 8.88762857 | ACTB/S100A1/NDRG2/FGF2/                        | 13 0.295454545454545 |
| GO:0046777 BP | GO:0046777 protein            | 36/1414 | 226/18903 | 1.287225406 | 0.0001419 | 9.09548784 | JUN/THY1/PDGFRB/PDGFRB/                        | 36 0.15929203539823  |
| GO:0031348 BP | GO:0031348 negative           | 41/1414 | 272/18903 | 1.322191332 | 0.0001455 | 9.32492834 | SOCS3/HTRA1/PSMB4/NT5E/                        | 41 0.150735294117647 |
| GO:1902106 BP | GO:1902106 negative           | 22/1414 | 108/18903 | 1.350895595 | 0.0001483 | 9.50942661 | MAFB/FBN1/RUNX1/GLI3/LA                        | 22 0.203703703703704 |
| GO:0043154 BP | GO:0043154 negative           | 18/1414 | 78/18903  | 1.360107057 | 0.0001491 | 9.55627257 | AQP1/NR4A1/CRYAB/PTGS2/                        | 18 0.230769230769231 |
| GO:0032922 BP | GO:0032922 circadian          | 17/1414 | 71/18903  | 1.395593987 | 0.0001527 | 9.78721091 | EGR1/ID4/ZFH3/ID3/NAMP                         | 17 0.23943661971831  |
| GO:0010950 BP | GO:0010950 positive           | 30/1414 | 174/18903 | 1.402712681 | 0.0001532 | 9.81871226 | GSN/CFLAR/CYCS/AKIRIN2/                        | 30 0.172413793103448 |
| GO:1904705 BP | GO:1904705 regulation of      | 20/1414 | 93/18903  | 1.421826234 | 0.0001550 | 9.93390055 | MMP2/GJA1/JUN/TPM1/NDRG                        | 20 0.21505376344086  |
| GO:0032516 BP | GO:0032516 positive           | 9/1414  | 22/18903  | 1.453330068 | 0.0001578 | 0.00010116 | PDGFRB/MAGI2/CALM2/PPP1                        | 9 0.409090909090909  |
| GO:0061042 BP | GO:0061042 vascular           | 9/1414  | 22/18903  | 1.453330068 | 0.0001578 | 0.00010116 | SMOC2/XBP1/VEGFA/NDNF/C                        | 9 0.409090909090909  |
| GO:0007009 BP | GO:0007009 plasma             | 29/1414 | 166/18903 | 1.497248058 | 0.0001617 | 0.00010365 | MAFB/COL5A1/VMP1/ANK3/S                        | 29 0.174698795180723 |
| GO:0030225 BP | GO:0030225 macrophage         | 14/1414 | 51/18903  | 1.497416235 | 0.0001617 | 0.00010365 | TSPAN2/INHBA/TGFB1/VEGF                        | 14 0.274509803921569 |
| GO:1900047 BP | GO:1900047 negative           | 14/1414 | 51/18903  | 1.497416235 | 0.0001617 | 0.00010365 | PDGFRA/FAP/COMP/SERPINE                        | 14 0.274509803921569 |
| GO:0001101 BP | GO:0001101 response to        | 25/1414 | 133/18903 | 1.574846305 | 0.0001694 | 0.00010860 | COL1A1/MMP2/COL1A2/COL5                        | 25 0.18796992481203  |
| GO:0035303 BP | GO:0035303 regulation of      | 25/1414 | 133/18903 | 1.574846305 | 0.0001694 | 0.00010860 | PDGFRB/RCAN1/MAGI2/BMP2                        | 25 0.18796992481203  |
| GO:0090101 BP | GO:0090101 negative           | 28/1414 | 158/18903 | 1.587681048 | 0.0001705 | 0.00010929 | NBL1/LTBP1/FBN1/ASPN/CI                        | 28 0.177215189873418 |
| GO:0045582 BP | GO:0045582 positive           | 23/1414 | 117/18903 | 1.601044458 | 0.0001716 | 0.00011000 | SOX4/ACTB/RUNX1/GLI3/ZB                        | 23 0.196581196581197 |
| GO:0002063 BP | GO:0002063 chondrocyte        | 11/1414 | 33/18903  | 1.637631250 | 0.0001752 | 0.00011231 | SERPINH1/ECM1/COMP/SULF                        | 11 0.333333333333333 |
| GO:0006826 BP | GO:0006826 iron ion           | 15/1414 | 58/18903  | 1.646397651 | 0.0001758 | 0.00011271 | SLC40A1/MELTF/TF/SLC39A                        | 15 0.258620689655172 |
| GO:1900046 BP | GO:1900046 regulation of      | 17/1414 | 72/18903  | 1.700954659 | 0.0001810 | 0.00011602 | PDGFRA/FAP/COMP/SERPINE                        | 17 0.236111111111111 |
| GO:1903317 BP | GO:1903317 regulation of      | 17/1414 | 72/18903  | 1.700954659 | 0.0001810 | 0.00011602 | SOX4/RUNX1/GAS1/MELTF/G                        | 17 0.236111111111111 |
| GO:0038061 BP | GO:0038061 NIK/NF-kappaB      | 26/1414 | 142/18903 | 1.743361086 | 0.0001852 | 0.00011869 | CHI3L1/NFKBIA/PRDX1/RPS                        | 26 0.183098591549296 |
| GO:0060538 BP | GO:0060538 skeletal           | 30/1414 | 176/18903 | 1.764005923 | 0.0001870 | 0.00011988 | EGR1/FOS/TWIST1/SIX1/CD                        | 30 0.170454545454545 |
| GO:0001763 BP | GO:0001763 morphogenesis      | 33/1414 | 203/18903 | 1.900704273 | 0.0002012 | 0.00012894 | SOCS3/SEMA3C/SIX1/RSP02                        | 33 0.16256157635468  |

|               |                                       |         |           |             |           |            |                         |    |                   |
|---------------|---------------------------------------|---------|-----------|-------------|-----------|------------|-------------------------|----|-------------------|
| GO:0010043 BP | GO:0010043 response to                | 14/1414 | 52/18903  | 1.909125526 | 0.0002017 | 0.00012927 | CRIP1/MT1G/MT1M/MT1A/MT | 14 | 0.269230769230769 |
| GO:0014068 BP | GO:0014068 positive                   | 18/1414 | 80/18903  | 1.969446855 | 0.0002074 | 0.00013296 | PDGFRA/PDGFRB/FGFR1/FN1 | 18 | 0.225             |
| GO:0050808 BP | GO:0050808 synapse organization       | 57/1414 | 432/18903 | 1.970661899 | 0.0002074 | 0.00013296 | TNC/THBS2/TUBB/TUBA1A/P | 57 | 0.131944444444444 |
| GO:0002763 BP | GO:0002763 positive                   | 15/1414 | 59/18903  | 2.056346819 | 0.0002157 | 0.00013824 | ZFP36L1/FOS/KLF10/RUNX1 | 15 | 0.254237288135593 |
| GO:0043666 BP | GO:0043666 regulation of              | 15/1414 | 59/18903  | 2.056346819 | 0.0002157 | 0.00013824 | PDGFRB/RCAN1/MAGI2/CALM | 15 | 0.254237288135593 |
| GO:0048144 BP | GO:0048144 fibroblast                 | 21/1414 | 103/18903 | 2.075974183 | 0.0002173 | 0.00013931 | COL3A1/JUN/PDGFRB/AQP1/ | 21 | 0.203883495145631 |
| GO:0001701 BP | GO:0001701 in utero embryonic         | 53/1414 | 393/18903 | 2.084763078 | 0.0002179 | 0.00013965 | COL3A1/PDGFRB/SOCS3/ZFP | 53 | 0.134860050890585 |
| GO:0034605 BP | GO:0034605 cellular                   | 16/1414 | 66/18903  | 2.100914289 | 0.0002192 | 0.00014048 | DNAJB1/HSPA1A/HSPA1B/TR | 16 | 0.242424242424242 |
| GO:0085029 BP | GO:0085029 extracellular              | 13/1414 | 46/18903  | 2.137486285 | 0.0002224 | 0.00014256 | COL1A2/COL3A1/ANTXR1/TN | 13 | 0.282608695652174 |
| GO:0072006 BP | GO:0072006 nephron                    | 27/1414 | 152/18903 | 2.139645396 | 0.0002224 | 0.00014256 | EGR1/PDGFRB/AQP1/PDGFRB | 27 | 0.177631578947368 |
| GO:0061008 BP | GO:0061008 hepaticobilia              | 26/1414 | 144/18903 | 2.248959103 | 0.0002334 | 0.00014957 | JUN/CADM1/NOTCH2/GLI3/H | 26 | 0.180555555555556 |
| GO:0140467 BP | GO:0140467 integrated                 | 12/1414 | 40/18903  | 2.278061234 | 0.0002360 | 0.00015124 | MAFB/JUN/FOS/JUNB/DDIT3 | 12 | 0.3               |
| GO:0032868 BP | GO:0032868 response to                | 40/1414 | 269/18903 | 2.313715331 | 0.0002392 | 0.00015334 | COL1A1/EGR1/SOCS3/ZFP36 | 40 | 0.148698884758364 |
| GO:0072332 BP | GO:0072332 intrinsic                  | 18/1414 | 81/18903  | 2.357166118 | 0.0002433 | 0.00015594 | UBB/CDKN1A/NUPR1/CD44/D | 18 | 0.222222222222222 |
| GO:0060828 BP | GO:0060828 regulation of              | 39/1414 | 260/18903 | 2.382564829 | 0.0002453 | 0.00015721 | COL1A1/IGFBP4/EGR1/DKK3 | 39 | 0.15              |
| GO:0003012 BP | GO:0003012 muscle system process      | 59/1414 | 455/18903 | 2.384763218 | 0.0002453 | 0.00015721 | GJA1/CALD1/TPM4/FOXP1/L | 59 | 0.12967032967033  |
| GO:0046683 BP | GO:0046683 response to                | 24/1414 | 128/18903 | 2.413234439 | 0.0002478 | 0.00015881 | COL1A1/FOSB/ZFP36L1/AQP | 24 | 0.1875            |
| GO:0110020 BP | GO:0110020 regulation of              | 21/1414 | 104/18903 | 2.420399546 | 0.0002481 | 0.00015900 | ACTG1/TPM1/PIK3R1/RHOC/ | 21 | 0.201923076923077 |
| GO:0042267 BP | GO:0042267 natural                    | 17/1414 | 74/18903  | 2.495409229 | 0.0002549 | 0.00016335 | CADM1/TUBB/LAG3/TUBB4B/ | 17 | 0.22972972972973  |
| GO:0048662 BP | GO:0048662 negative                   | 17/1414 | 74/18903  | 2.495409229 | 0.0002549 | 0.00016335 | TPM1/OGN/APOD/NDRG2/SOD | 17 | 0.22972972972973  |
| GO:0046686 BP | GO:0046686 response to                | 15/1414 | 60/18903  | 2.553931940 | 0.0002599 | 0.00016660 | JUN/FOS/MT1G/MT1M/MT1A/ | 15 | 0.25              |
| GO:2000351 BP | GO:2000351 regulation of              | 15/1414 | 60/18903  | 2.553931940 | 0.0002599 | 0.00016660 | ANGPTL4/ICAM1/RGCC/NDNF | 15 | 0.25              |
| GO:0070613 BP | GO:0070613 regulation of              | 16/1414 | 67/18903  | 2.570319551 | 0.0002611 | 0.00016737 | RUNX1/GAS1/MELTF/GSN/SE | 16 | 0.238805970149254 |
| GO:0006470 BP | GO:0006470 protein dephosphorylation  | 39/1414 | 261/18903 | 2.603275528 | 0.0002640 | 0.00016923 | PDGFRB/PTPRD/RCAN1/MAGI | 39 | 0.149425287356322 |
| GO:0016311 BP | GO:0016311 dephosphorylation          | 49/1414 | 357/18903 | 2.660697404 | 0.0002694 | 0.00017266 | PDGFRB/PTPRD/RCAN1/TNS3 | 49 | 0.137254901960784 |
| GO:0007584 BP | GO:0007584 response to                | 27/1414 | 154/18903 | 2.724523442 | 0.0002746 | 0.00017602 | COL1A1/POSTN/STC2/SPP1/ | 27 | 0.175324675324675 |
| GO:0043524 BP | GO:0043524 negative                   | 27/1414 | 154/18903 | 2.724523442 | 0.0002746 | 0.00017602 | JUN/SIX1/RETREG1/SOD2/C | 27 | 0.175324675324675 |
| GO:0050767 BP | GO:0050767 regulation of neurogenesis | 51/1414 | 377/18903 | 2.726569648 | 0.0002746 | 0.00017602 | THY1/SEMA3C/PTPRD/ID4/G | 51 | 0.135278514588859 |
| GO:0045601 BP | GO:0045601 regulation of              | 13/1414 | 47/18903  | 2.753887925 | 0.0002764 | 0.00017717 | ZEB1/BMP6/VEGFA/ROCK1/J | 13 | 0.276595744680851 |
| GO:0045646 BP | GO:0045646 regulation of              | 13/1414 | 47/18903  | 2.753887925 | 0.0002764 | 0.00017717 | MAFB/ZFP36L1/HSPA1A/HSP | 13 | 0.276595744680851 |

|               |                                   |         |           |             |           |            |                         |    |                   |
|---------------|-----------------------------------|---------|-----------|-------------|-----------|------------|-------------------------|----|-------------------|
| GO:0051101 BP | GO:0051101 regulation of          | 23/1414 | 121/18903 | 2.819894256 | 0.0002821 | 0.00018079 | JUN/TWIST1/HES1/DDIT3/N | 23 | 0.190082644628099 |
| GO:0090100 BP | GO:0090100 positive               | 23/1414 | 121/18903 | 2.819894256 | 0.0002821 | 0.00018079 | DAB2/ZEB2/RBPJ/NOTCH2/H | 23 | 0.190082644628099 |
| GO:0010592 BP | GO:0010592 positive               | 10/1414 | 29/18903  | 2.844820803 | 0.0002841 | 0.00018208 | PIK3R1/HSP90AA1/ARPC2/T | 10 | 0.344827586206897 |
| GO:0031333 BP | GO:0031333 negative               | 26/1414 | 146/18903 | 2.883756927 | 0.0002875 | 0.00018425 | CAPZB/CRYAB/SCIN/GSN/BI | 26 | 0.178082191780822 |
| GO:0097305 BP | GO:0097305 response to            | 38/1414 | 253/18903 | 2.925679779 | 0.0002912 | 0.00018661 | FOSE/FOS/CTSK/CD01/IGFB | 38 | 0.150197628458498 |
| GO:0061458 BP | GO:0061458 reproductive system    | 44/1414 | 310/18903 | 2.985885430 | 0.0002967 | 0.00019013 | MMP2/TNC/PDGFR/PAK1/    | 44 | 0.141935483870968 |
| GO:0051693 BP | GO:0051693 actin                  | 12/1414 | 41/18903  | 3.002842193 | 0.0002968 | 0.00019024 | CAPZB/SCIN/GSN/TWF2/CAP | 12 | 0.292682926829268 |
| GO:0150077 BP | GO:0150077 regulation of          | 12/1414 | 41/18903  | 3.002842193 | 0.0002968 | 0.00019024 | PLCG2/MMP3/NR1D1/NUPR1/ | 12 | 0.292682926829268 |
| GO:1905314 BP | GO:1905314 semi-lunar             | 12/1414 | 41/18903  | 3.002842193 | 0.0002968 | 0.00019024 | TWIST1/RBPJ/NOTCH2/SNAI | 12 | 0.292682926829268 |
| GO:0045621 BP | GO:0045621 positive               | 24/1414 | 130/18903 | 3.146192320 | 0.0003105 | 0.00019898 | SOX4/ACTB/RUNX1/GLI3/ZB | 24 | 0.184615384615385 |
| GO:0007519 BP | GO:0007519 skeletal               | 28/1414 | 164/18903 | 3.217399675 | 0.0003170 | 0.00020314 | EGR1/FOS/TWIST1/SIX1/CD | 28 | 0.170731707317073 |
| GO:0007492 BP | GO:0007492 endoderm               | 18/1414 | 83/18903  | 3.342099912 | 0.0003287 | 0.00021066 | MMP2/COL12A1/COL5A1/COL | 18 | 0.216867469879518 |
| GO:0048017 BP | GO:0048017 inositol               | 30/1414 | 182/18903 | 3.414241426 | 0.0003352 | 0.00021484 | PDGFRA/ZFP36L1/PDGFRB/T | 30 | 0.164835164835165 |
| GO:0032930 BP | GO:0032930 positive               | 8/1414  | 19/18903  | 3.438340121 | 0.0003370 | 0.00021600 | TGFB1/TYROBP/ITGB2/CLEC | 8  | 0.421052631578947 |
| GO:1901215 BP | GO:1901215 negative               | 34/1414 | 218/18903 | 3.462762852 | 0.0003388 | 0.00021717 | JUN/GPNMB/SIX1/RETREG1/ | 34 | 0.155963302752294 |
| GO:0002224 BP | GO:0002224 toll-like              | 23/1414 | 123/18903 | 3.699254395 | 0.0003614 | 0.00023161 | PLCG2/NFKBIA/NR1D1/PELI | 23 | 0.186991869918699 |
| GO:0031346 BP | GO:0031346 positive regulation of | 48/1414 | 352/18903 | 3.787088363 | 0.0003693 | 0.00023671 | PTPRD/FLNA/DPYSL3/NTN1/ | 48 | 0.136363636363636 |
| GO:0031099 BP | GO:0031099 regeneration           | 31/1414 | 192/18903 | 3.842479076 | 0.0003741 | 0.00023977 | MMP2/TNC/JUN/THY1/PRRX1 | 31 | 0.161458333333333 |
| GO:0072503 BP | GO:0072503 cellular               | 45/1414 | 323/18903 | 3.873796509 | 0.0003762 | 0.00024110 | THY1/FLNA/MT1G/PLCG2/MT | 45 | 0.139318885448916 |
| GO:1904036 BP | GO:1904036 negative               | 15/1414 | 62/18903  | 3.876679059 | 0.0003762 | 0.00024110 | ANGPTL4/CFLAR/NUPR1/ICA | 15 | 0.241935483870968 |
| GO:0010921 BP | GO:0010921 regulation of          | 18/1414 | 84/18903  | 3.959899127 | 0.0003836 | 0.00024587 | PDGFRB/RCAN1/MAGI2/BMP2 | 18 | 0.214285714285714 |
| GO:0030522 BP | GO:0030522 intracellular          | 39/1414 | 266/18903 | 4.014370870 | 0.0003883 | 0.00024884 | FOXP1/TWIST1/DAB2/LBH/M | 39 | 0.146616541353383 |
| GO:0051250 BP | GO:0051250 negative               | 28/1414 | 166/18903 | 4.030669482 | 0.0003892 | 0.00024944 | GPNMB/RUNX1/GLI3/LAG3/I | 28 | 0.168674698795181 |
| GO:0001569 BP | GO:0001569 branching              | 11/1414 | 36/18903  | 4.125434554 | 0.0003964 | 0.00025404 | VEGFA/NRP1/PLXND1/GNA13 | 11 | 0.305555555555556 |
| GO:0030224 BP | GO:0030224 monocyte               | 11/1414 | 36/18903  | 4.125434554 | 0.0003964 | 0.00025404 | JUN/FOXP1/ZFP36L1/MT1G/ | 11 | 0.305555555555556 |
| GO:0090218 BP | GO:0090218 positive               | 11/1414 | 36/18903  | 4.125434554 | 0.0003964 | 0.00025404 | PDGFRA/PDGFRB/FGF2/TGFB | 11 | 0.305555555555556 |
| GO:0016525 BP | GO:0016525 negative               | 26/1414 | 149/18903 | 4.141811165 | 0.0003973 | 0.00025463 | THBS2/CCN6/CNMD/SPARC/S | 26 | 0.174496644295302 |
| GO:0014706 BP | GO:0014706 striated               | 38/1414 | 257/18903 | 4.157324223 | 0.0003981 | 0.00025516 | GJA1/PDGFR/FOXP1/PDGFR  | 38 | 0.147859922178988 |
| GO:0050731 BP | GO:0050731 positive               | 31/1414 | 193/18903 | 4.256122291 | 0.0004069 | 0.00026080 | PLCG2/HES1/CSPG4/TGFB1/ | 31 | 0.160621761658031 |
| GO:0002228 BP | GO:0002228 natural                | 17/1414 | 77/18903  | 4.306135420 | 0.0004110 | 0.00026343 | CADM1/TUBB/LAG3/TUBB4B/ | 17 | 0.220779220779221 |
| GO:0001889 BP | GO:0001889 liver                  | 25/1414 | 141/18903 | 4.394728466 | 0.0004181 | 0.00026797 | JUN/CADM1/NOTCH2/GLI3/H | 25 | 0.177304964539007 |
| GO:0070555 BP | GO:0070555 response to            | 25/1414 | 141/18903 | 4.394728466 | 0.0004181 | 0.00026797 | MMP2/EGR1/CHI3L1/HES1/G | 25 | 0.177304964539007 |
| GO:0035307 BP | GO:0035307 positive               | 13/1414 | 49/18903  | 4.465864738 | 0.0004235 | 0.00027142 | PDGFRB/MAGI2/CAMTA1/TGF | 13 | 0.26530612244898  |
| GO:0043114 BP | GO:0043114 regulation of          | 13/1414 | 49/18903  | 4.465864738 | 0.0004235 | 0.00027142 | TRPV4/TGFB1/BMP6/VEGFA/ | 13 | 0.26530612244898  |

|               |                                   |         |           |             |           |            |                                                |    |                   |
|---------------|-----------------------------------|---------|-----------|-------------|-----------|------------|------------------------------------------------|----|-------------------|
| GO:0030193 BP | GO:0030193 regulation of          | 16/1414 | 70/18903  | 4.582041121 | 0.0004331 | 0.00027758 | PDGFRA/FAP/SERPINE2/ANX                        | 16 | 0.228571428571429 |
| GO:0032722 BP | GO:0032722 positive               | 16/1414 | 70/18903  | 4.582041121 | 0.0004331 | 0.00027758 | EGR1/TWIST1/TRPV4/SELEN                        | 16 | 0.228571428571429 |
| GO:0050680 BP | GO:0050680 negative               | 29/1414 | 176/18903 | 4.613578099 | 0.0004354 | 0.00027904 | DAB2/ZEB1/CNMD/SPARC/TG                        | 29 | 0.164772727272727 |
| GO:0048608 BP | GO:0048608 reproductive structure | 43/1414 | 306/18903 | 4.649809943 | 0.0004381 | 0.00028078 | MMP2/TNC/PDGFRB/PDGFRB/ID4/CRIP1/GLI3/COL9A3/P | 43 | 0.140522875816993 |
| GO:0034614 BP | GO:0034614 cellular               | 26/1414 | 150/18903 | 4.659896384 | 0.0004383 | 0.00028088 | MMP2/JUN/PDGFRB/FOXP1/A                        | 26 | 0.173333333333333 |
| GO:0042098 BP | GO:0042098 T cell                 | 33/1414 | 212/18903 | 4.666439832 | 0.0004383 | 0.00028088 | GNPMB/HES1/VCAM1/PNP/SE                        | 33 | 0.155660377358491 |
| GO:0043551 BP | GO:0043551 regulation of          | 14/1414 | 56/18903  | 4.721918422 | 0.0004428 | 0.00028376 | PDGFRA/SOCS3/PDGFRB/PIK                        | 14 | 0.25              |
| GO:0002460 BP | GO:0002460 adaptive immune        | 50/1414 | 375/18903 | 4.762509256 | 0.0004459 | 0.00028574 | C1R/JUNB/C1S/CD55/TGFB1/ICAM1/ANXA1/HSPD1/NFKB | 50 | 0.133333333333333 |
| GO:0051960 BP | GO:0051960 regulation of nervous  | 58/1414 | 456/18903 | 4.854035565 | 0.0004537 | 0.00029076 | THBS2/THY1/SEMA3C/PTPRD/ID4/GLI3/NTN1/HES1/PTN | 58 | 0.12719298245614  |
| GO:0002468 BP | GO:0002468 dendritic              | 7/1414  | 15/18903  | 4.862373583 | 0.0004537 | 0.00029080 | HLA-DRB1/HLA-                                  | 7  | 0.466666666666667 |
| GO:0050769 BP | GO:0050769 positive               | 35/1414 | 231/18903 | 4.948205913 | 0.0004610 | 0.00029546 | PTPRD/ID4/GLI3/NTN1/HES                        | 35 | 0.151515151515152 |
| GO:0042554 BP | GO:0042554 superoxide             | 12/1414 | 43/18903  | 5.069671744 | 0.0004708 | 0.00030174 | SOD2/TGFB1/TYROBP/CYBB/                        | 12 | 0.27906976744186  |
| GO:1904037 BP | GO:1904037 positive               | 12/1414 | 43/18903  | 5.069671744 | 0.0004708 | 0.00030174 | H19/GSN/RGCC/ARRB2/CCL2                        | 12 | 0.27906976744186  |
| GO:0016485 BP | GO:0016485 protein                | 37/1414 | 250/18903 | 5.110013558 | 0.0004738 | 0.00030366 | MAFB/C1R/RUNX1/GAS1/GLI                        | 37 | 0.148             |
| GO:0001764 BP | GO:0001764 neuron                 | 29/1414 | 177/18903 | 5.130645211 | 0.0004743 | 0.00030399 | COL3A1/TWIST1/NTN1/TUBB                        | 29 | 0.163841807909605 |
| GO:0007249 BP | GO:0007249 I-kappaB               | 41/1414 | 288/18903 | 5.131842473 | 0.0004743 | 0.00030399 | GJA1/S100A4/ECM1/LGALS1                        | 41 | 0.142361111111111 |
| GO:2000181 BP | GO:2000181 negative               | 26/1414 | 151/18903 | 5.235583464 | 0.0004832 | 0.00030965 | THBS2/CCN6/CNMD/SPARC/S                        | 26 | 0.172185430463576 |
| GO:0048738 BP | GO:0048738 cardiac                | 36/1414 | 241/18903 | 5.271559084 | 0.0004857 | 0.00031128 | GJA1/PDGFR/FOXP1/PDGFR                         | 36 | 0.149377593360996 |
| GO:0002577 BP | GO:0002577 regulation of          | 8/1414  | 20/18903  | 5.355241364 | 0.0004926 | 0.00031573 | CD74/CD68/PYCARD/FGL2/F                        | 8  | 0.4               |
| GO:0003176 BP | GO:0003176 aortic valve           | 11/1414 | 37/18903  | 5.476420731 | 0.0005016 | 0.00032143 | TWIST1/RBPJ/SNAI1/BMP2/                        | 11 | 0.297297297297297 |
| GO:0051084 BP | GO:0051084 'de novo'              | 11/1414 | 37/18903  | 5.476420731 | 0.0005016 | 0.00032143 | DNAJB1/HSPA1A/HSPA1B/HS                        | 11 | 0.297297297297297 |
| GO:0002313 BP | GO:0002313 mature B cell          | 10/1414 | 31/18903  | 5.486424337 | 0.0005016 | 0.00032143 | LGALS1/NOTCH2/PLCG2/ITM                        | 10 | 0.32258064516129  |
| GO:0060055 BP | GO:0060055 angiogenesis           | 10/1414 | 31/18903  | 5.486424337 | 0.0005016 | 0.00032143 | SMOC2/XBP1/VEGFA/NDNF/C                        | 10 | 0.32258064516129  |
| GO:0003208 BP | GO:0003208 cardiac                | 16/1414 | 71/18903  | 5.509007560 | 0.0005028 | 0.00032225 | SOX4/SEMA3C/RBPJ/TPM1/C                        | 16 | 0.225352112676056 |
| GO:0030195 BP | GO:0030195 negative               | 13/1414 | 50/18903  | 5.625261267 | 0.0005110 | 0.00032751 | PDGFRA/FAP/SERPINE2/ANX                        | 13 | 0.26              |
| GO:0032964 BP | GO:0032964 collagen               | 13/1414 | 50/18903  | 5.625261267 | 0.0005110 | 0.00032751 | COL1A1/COL5A1/SERPINH1/                        | 13 | 0.26              |
| GO:1902041 BP | GO:1902041 regulation of          | 13/1414 | 50/18903  | 5.625261267 | 0.0005110 | 0.00032751 | CFLAR/ICAM1/PEA15/ATF3/                        | 13 | 0.26              |
| GO:0043200 BP | GO:0043200 response to            | 22/1414 | 118/18903 | 5.672889546 | 0.0005138 | 0.00032926 | COL1A1/MMP2/COL1A2/COL5                        | 22 | 0.186440677966102 |
| GO:0051261 BP | GO:0051261 protein                | 22/1414 | 118/18903 | 5.672889546 | 0.0005138 | 0.00032926 | CAPZB/LIMA1/HSPA8/SCIN/                        | 22 | 0.186440677966102 |
| GO:0048015 BP | GO:0048015 phosphatidyli          | 29/1414 | 178/18903 | 5.699449722 | 0.0005154 | 0.00033029 | PDGFRA/ZFP36L1/PDGFRB/T                        | 29 | 0.162921348314607 |
| GO:0002042 BP | GO:0002042 cell                   | 19/1414 | 94/18903  | 5.731339610 | 0.0005175 | 0.00033162 | PIK3R3/NR4A1/FGF2/PTGS2                        | 19 | 0.202127659574468 |
| GO:0033632 BP | GO:0033632 regulation of          | 6/1414  | 11/18903  | 5.767543245 | 0.0005199 | 0.00033320 | PIEZO1/FERMT3/SWAP70/PO                        | 6  | 0.545454545454545 |
| GO:1901343 BP | GO:1901343 negative               | 26/1414 | 152/18903 | 5.874427827 | 0.0005287 | 0.00033885 | THBS2/CCN6/CNMD/SPARC/S                        | 26 | 0.171052631578947 |

|               |                                         |         |           |             |           |            |                         |    |                    |
|---------------|-----------------------------------------|---------|-----------|-------------|-----------|------------|-------------------------|----|--------------------|
| GO:0042476 BP | GO:0042476 odontogenesis                | 24/1414 | 135/18903 | 5.928539851 | 0.0005328 | 0.00034145 | COL1A1/COL1A2/PDGFR/AQ  | 24 | 0.1777777777777778 |
| GO:0001704 BP | GO:0001704 formation of                 | 23/1414 | 127/18903 | 6.228885638 | 0.0005589 | 0.00035819 | MMP2/COL12A1/COL5A1/GJA | 23 | 0.181102362204724  |
| GO:0030177 BP | GO:0030177 positive                     | 25/1414 | 144/18903 | 6.294976780 | 0.0005640 | 0.00036144 | COL1A1/SOX4/DAB2/ZEB2/R | 25 | 0.1736111111111111 |
| GO:0060070 BP | GO:0060070 canonical Wnt                | 43/1414 | 310/18903 | 6.321634210 | 0.0005655 | 0.00036241 | COL1A1/IGFBP4/EGR1/DKK3 | 43 | 0.138709677419355  |
| GO:0002833 BP | GO:0002833 positive                     | 30/1414 | 188/18903 | 6.358839990 | 0.0005680 | 0.00036399 | CADM1/HEXIM1/LAG3/PLCG2 | 30 | 0.159574468085106  |
| GO:0014910 BP | GO:0014910 regulation of                | 18/1414 | 87/18903  | 6.464473421 | 0.0005756 | 0.00036890 | PDGFRB/TPM1/S100A11/LPA | 18 | 0.206896551724138  |
| GO:0048145 BP | GO:0048145 regulation of                | 18/1414 | 87/18903  | 6.464473421 | 0.0005756 | 0.00036890 | JUN/PDGFR/AQP1/PDGFRB/  | 18 | 0.206896551724138  |
| GO:0042698 BP | GO:0042698 ovulation                    | 16/1414 | 72/18903  | 6.597022675 | 0.0005848 | 0.00037475 | MMP2/EGR1/PDGFR/TIMP4/  | 16 | 0.2222222222222222 |
| GO:0045600 BP | GO:0045600 positive                     | 16/1414 | 72/18903  | 6.597022675 | 0.0005848 | 0.00037475 | ZFP36L1/SIX1/ZFP36/FRZB | 16 | 0.2222222222222222 |
| GO:1901880 BP | GO:1901880 negative                     | 16/1414 | 72/18903  | 6.597022675 | 0.0005848 | 0.00037475 | CAPZB/LIMA1/SCIN/GSN/TW | 16 | 0.2222222222222222 |
| GO:0014066 BP | GO:0014066 regulation of                | 21/1414 | 111/18903 | 6.647812541 | 0.0005884 | 0.00037706 | PDGFR/PDGFRB/TWIST1/FG  | 21 | 0.189189189189189  |
| GO:0042113 BP | GO:0042113 B cell<br>activation         | 47/1414 | 350/18903 | 6.659342880 | 0.0005885 | 0.00037715 | ZFP36L1/KLF6/LGALS1/RBP | 47 | 0.134285714285714  |
| GO:0006929 BP | GO:0006929 substrate-                   | 9/1414  | 26/18903  | 6.940906051 | 0.0006088 | 0.00039014 | ITGA11/NTN1/CSPG4/FN1/S | 9  | 0.346153846153846  |
| GO:0051016 BP | GO:0051016 barbed-end                   | 9/1414  | 26/18903  | 6.940906051 | 0.0006088 | 0.00039014 | CAPZB/SCIN/GSN/TWF2/CAP | 9  | 0.346153846153846  |
| GO:0060343 BP | GO:0060343 trabecula                    | 9/1414  | 26/18903  | 6.940906051 | 0.0006088 | 0.00039014 | COL1A1/MMP2/SLC40A1/RBP | 9  | 0.346153846153846  |
| GO:1903306 BP | GO:1903306 negative                     | 9/1414  | 26/18903  | 6.940906051 | 0.0006088 | 0.00039014 | RABGEF1/SPI1/CD84/FCGR2 | 9  | 0.346153846153846  |
| GO:1905523 BP | GO:1905523 positive                     | 9/1414  | 26/18903  | 6.940906051 | 0.0006088 | 0.00039014 | TRPV4/CSF1R/CCL3/C3AR1/ | 9  | 0.346153846153846  |
| GO:0001913 BP | GO:0001913 T cell                       | 13/1414 | 51/18903  | 7.037418778 | 0.0006163 | 0.00039497 | HLA-DRB1/HLA-           | 13 | 0.254901960784314  |
| GO:0014065 BP | GO:0014065 phosphatidyl                 | 25/1414 | 145/18903 | 7.075483549 | 0.0006187 | 0.00039651 | PDGFR/ZFP36L1/PDGFRB/T  | 25 | 0.172413793103448  |
| GO:0048010 BP | GO:0048010 vascular                     | 14/1414 | 58/18903  | 7.164606271 | 0.0006246 | 0.00040030 | MAPKAPK2/VEGFA/ITGA5/HS | 14 | 0.241379310344828  |
| GO:0060350 BP | GO:0060350 endochondral                 | 14/1414 | 58/18903  | 7.164606271 | 0.0006246 | 0.00040030 | COL1A1/COL3A1/SERPINH1/ | 14 | 0.241379310344828  |
| GO:0045773 BP | GO:0045773 positive                     | 11/1414 | 38/18903  | 7.190093475 | 0.0006259 | 0.00040113 | NTN1/FN1/VEGFA/SHTN1/NR | 11 | 0.289473684210526  |
| GO:0051085 BP | GO:0051085 chaperone                    | 10/1414 | 32/18903  | 7.448172159 | 0.0006465 | 0.00041429 | DNAJB1/HSPA1A/HSPA1B/HS | 10 | 0.3125             |
| GO:0061036 BP | GO:0061036 positive                     | 10/1414 | 32/18903  | 7.448172159 | 0.0006465 | 0.00041429 | GLI3/SOX5/ZBTB16/BMP2/B | 10 | 0.3125             |
| GO:1901879 BP | GO:1901879 regulation of                | 18/1414 | 88/18903  | 7.566334651 | 0.0006557 | 0.00042024 | CAPZB/LIMA1/SCIN/GSN/TR | 18 | 0.204545454545455  |
| GO:0045445 BP | GO:0045445 myoblast                     | 21/1414 | 112/18903 | 7.614225834 | 0.0006589 | 0.00042227 | ZFP36L1/SOX4/LGALS1/ACT | 21 | 0.1875             |
| GO:0150063 BP | GO:0150063 visual system<br>development | 51/1414 | 392/18903 | 7.630749884 | 0.0006594 | 0.00042256 | COL5A1/COL5A2/JUN/THY1/ | 51 | 0.130102040816327  |
| GO:0007411 BP | GO:0007411 axon guidance                | 35/1414 | 236/18903 | 7.721711705 | 0.0006658 | 0.00042670 | ENAH/SEMA3C/NOTCH2/GLI3 | 35 | 0.148305084745763  |
| GO:0002275 BP | GO:0002275 myeloid cell                 | 19/1414 | 96/18903  | 7.739816568 | 0.0006658 | 0.00042670 | S100A13/PLCG2/RABGEF1/T | 19 | 0.197916666666667  |
| GO:1903321 BP | GO:1903321 negative                     | 19/1414 | 96/18903  | 7.739816568 | 0.0006658 | 0.00042670 | SOX4/HSPA1A/HSPA1B/DNAJ | 19 | 0.197916666666667  |
| GO:0043409 BP | GO:0043409 negative                     | 29/1414 | 181/18903 | 7.763100195 | 0.0006668 | 0.00042735 | DAB2/FOXO1/DNAJA1/NDRG2 | 29 | 0.160220994475138  |
| GO:0043122 BP | GO:0043122 regulation of                | 37/1414 | 255/18903 | 7.816677534 | 0.0006705 | 0.00042967 | GJA1/S100A4/ECM1/LGALS1 | 37 | 0.145098039215686  |
| GO:0030032 BP | GO:0030032 lamellipodium                | 16/1414 | 73/18903  | 7.869327916 | 0.0006730 | 0.00043130 | CAPZB/PIK3R1/RHOD/HSP90 | 16 | 0.219178082191781  |
| GO:0071677 BP | GO:0071677 positive                     | 16/1414 | 73/18903  | 7.869327916 | 0.0006730 | 0.00043130 | SELENOK/CCL20/AIF1/CCL3 | 16 | 0.219178082191781  |

|               |                                |         |           |             |           |            |                         |    |                   |
|---------------|--------------------------------|---------|-----------|-------------|-----------|------------|-------------------------|----|-------------------|
| GO:0072073 BP | GO:0072073 kidney              | 25/1414 | 146/18903 | 7.941542768 | 0.0006782 | 0.00043462 | AQP1/SIX1/NOTCH2/GLI3/H | 25 | 0.171232876712329 |
| GO:0150105 BP | GO:0150105 protein             | 8/1414  | 21/18903  | 8.084736190 | 0.0006865 | 0.00043995 | ACTG1/ACTB/PAK2/TJP1/VC | 8  | 0.380952380952381 |
| GO:0010715 BP | GO:0010715 regulation of       | 7/1414  | 16/18903  | 8.086015568 | 0.0006865 | 0.00043995 | FAP/MELTF/PDPN/TGFB1/CS | 7  | 0.4375            |
| GO:0034112 BP | GO:0034112 positive            | 7/1414  | 16/18903  | 8.086015568 | 0.0006865 | 0.00043995 | ANK3/PDPN/PLAUR/EMILIN2 | 7  | 0.4375            |
| GO:0051014 BP | GO:0051014 actin               | 7/1414  | 16/18903  | 8.086015568 | 0.0006865 | 0.00043995 | SCIN/GSN/GMFG/CAPG/CFL1 | 7  | 0.4375            |
| GO:0035148 BP | GO:0035148 tube                | 26/1414 | 155/18903 | 8.232317790 | 0.0006979 | 0.00044726 | TWIST1/SOX4/SIX1/CTHRC1 | 26 | 0.167741935483871 |
| GO:0031623 BP | GO:0031623 receptor            | 22/1414 | 121/18903 | 8.391275047 | 0.0007098 | 0.00045491 | PLCG2/MAGI2/SDCBP/ANXA2 | 22 | 0.181818181818182 |
| GO:0006879 BP | GO:0006879 cellular iron       | 15/1414 | 66/18903  | 8.421276624 | 0.0007098 | 0.00045491 | SLC40A1/TF/SLC39A14/CP/ | 15 | 0.227272727272727 |
| GO:0030837 BP | GO:0030837 negative            | 15/1414 | 66/18903  | 8.421276624 | 0.0007098 | 0.00045491 | CAPZB/SCIN/GSN/TMSB4X/T | 15 | 0.227272727272727 |
| GO:0097485 BP | GO:0097485 neuron              | 35/1414 | 237/18903 | 8.421866136 | 0.0007098 | 0.00045491 | ENAH/SEMA3C/NOTCH2/GLI3 | 35 | 0.147679324894515 |
| GO:0032272 BP | GO:0032272 negative            | 17/1414 | 81/18903  | 8.478185102 | 0.0007136 | 0.00045729 | CAPZB/SCIN/GSN/TMSB4X/T | 17 | 0.209876543209877 |
| GO:0006909 BP | GO:0006909 phagocytosis        | 43/1414 | 314/18903 | 8.524388522 | 0.0007164 | 0.00045912 | PLCG2/GSN/TGM2/ANXA1/TY | 43 | 0.136942675159236 |
| GO:0042129 BP | GO:0042129 regulation of       | 29/1414 | 182/18903 | 8.587393688 | 0.0007207 | 0.00046185 | GPNMB/HES1/VCAM1/PNP/SE | 29 | 0.159340659340659 |
| GO:0046849 BP | GO:0046849 bone                | 18/1414 | 89/18903  | 8.830693122 | 0.0007400 | 0.00047425 | GJA1/CTSK/NOTCH2/LTBP3/ | 18 | 0.202247191011236 |
| GO:0031396 BP | GO:0031396 regulation of       | 32/1414 | 210/18903 | 9.151370758 | 0.0007658 | 0.00049077 | SOX4/HSPA1A/UBB/UBE2S/H | 32 | 0.152380952380952 |
| GO:0045730 BP | GO:0045730 respiratory         | 11/1414 | 39/18903  | 9.342828758 | 0.0007770 | 0.00049794 | SELENOK/CD55/CYBB/CLEC7 | 11 | 0.282051282051282 |
| GO:0097242 BP | GO:0097242 amyloid-beta        | 11/1414 | 39/18903  | 9.342828758 | 0.0007770 | 0.00049794 | MSR1/ITGB2/ITGAM/C5AR1/ | 11 | 0.282051282051282 |
| GO:0002381 BP | GO:0002381 immunoglobuli       | 16/1414 | 74/18903  | 9.351788243 | 0.0007770 | 0.00049794 | TGFB1/HSPD1/HLA-        | 16 | 0.216216216216216 |
| GO:0006801 BP | GO:0006801 superoxide          | 16/1414 | 74/18903  | 9.351788243 | 0.0007770 | 0.00049794 | H19/SOD2/TGFB1/PRDX1/SO | 16 | 0.216216216216216 |
| GO:0051145 BP | GO:0051145 smooth muscle       | 16/1414 | 74/18903  | 9.351788243 | 0.0007770 | 0.00049794 | SIX1/SGCB/ZEB1/COMP/HES | 16 | 0.216216216216216 |
| GO:0051494 BP | GO:0051494 negative            | 27/1414 | 165/18903 | 9.376379924 | 0.0007779 | 0.00049854 | CAPZB/LIM1/SCIN/GSN/PI  | 27 | 0.163636363636364 |
| GO:0008361 BP | GO:0008361 regulation of       | 29/1414 | 183/18903 | 9.489488932 | 0.0007862 | 0.00050384 | AQP1/SEMA3C/NTN1/TRPV4/ | 29 | 0.158469945355191 |
| GO:0031954 BP | GO:0031954 positive            | 9/1414  | 27/18903  | 9.723373199 | 0.0008033 | 0.00051480 | GPNMB/CALM2/VEGFA/PDGFC | 9  | 0.333333333333333 |
| GO:0032967 BP | GO:0032967 positive            | 9/1414  | 27/18903  | 9.723373199 | 0.0008033 | 0.00051480 | PDGFRB/RUNX1/INHBA/LARP | 9  | 0.333333333333333 |
| GO:0002526 BP | GO:0002526 acute               | 21/1414 | 114/18903 | 9.928935146 | 0.0008191 | 0.00052494 | OSMR/SA1/VCAM1/FN1/A2M  | 21 | 0.184210526315789 |
| GO:0060395 BP | GO:0060395 SMAD protein        | 17/1414 | 82/18903  | 9.960246887 | 0.0008205 | 0.00052585 | JUN/FOS/DAB2/CILP/GDF10 | 17 | 0.207317073170732 |
| GO:0030888 BP | GO:0030888 regulation of       | 15/1414 | 67/18903  | 0.000101090 | 0.0008316 | 0.00053295 | CDKN1A/PELI1/CD74/TYROB | 15 | 0.223880597014925 |
| GO:0051924 BP | GO:0051924 regulation of       | 38/1414 | 268/18903 | 0.000103522 | 0.0008504 | 0.00054500 | THY1/PDGFRB/VMP1/PLCG2/ | 38 | 0.141791044776119 |
| GO:0097178 BP | GO:0097178 ruffle              | 12/1414 | 46/18903  | 0.000104281 | 0.0008555 | 0.00054823 | CSPG4/ICAM1/CAV1/EPS8L2 | 12 | 0.260869565217391 |
| GO:0050728 BP | GO:0050728 negative            | 29/1414 | 184/18903 | 0.000104757 | 0.0008582 | 0.00054996 | SOCS3/PSMB4/NT5E/ZFP36/ | 29 | 0.157608695652174 |
| GO:1905517 BP | GO:1905517 macrophage          | 14/1414 | 60/18903  | 0.000106407 | 0.0008705 | 0.00055784 | MMP2/TRPV4/SA1/CSF1R/C  | 14 | 0.233333333333333 |
| GO:0019216 BP | GO:0019216 regulation of lipid | 46/1414 | 347/18903 | 0.000107984 | 0.0008789 | 0.00056323 | EGR1/PDGFRB/DKK3/PDGFRB | 46 | 0.132564841498559 |
| GO:0072015 BP | GO:0072015 podocyte            | 6/1414  | 12/18903  | 0.000108035 | 0.0008789 | 0.00056323 | NOTCH2/MAGI2/IQGAP1/JAG | 6  | 0.5               |
| GO:2001214 BP | GO:2001214 positive            | 6/1414  | 12/18903  | 0.000108035 | 0.0008789 | 0.00056323 | RIN2/ADM/RAP1A/RAMP2/CD | 6  | 0.5               |
| GO:0071622 BP | GO:0071622 regulation of       | 13/1414 | 53/18903  | 0.000108039 | 0.0008789 | 0.00056323 | TRPV4/TNFAIP6/CD74/CSF1 | 13 | 0.245283018867925 |

|               |                                   |         |           |                          |                        |                          |                                                    |                      |
|---------------|-----------------------------------|---------|-----------|--------------------------|------------------------|--------------------------|----------------------------------------------------|----------------------|
| GO:0048880 BP | GO:0048880 sensory system         | 51/1414 | 398/18903 | 0.000112424<br>35030589  | 0.0009133<br>304113290 | 0.00058527<br>9090948856 | COL5A1/COL5A2/JUN/THY1/<br>PDGFRA/AQP1/PDGFRB/TWIS | 51 0.128140703517588 |
| GO:0001938 BP | GO:0001938 positive               | 21/1414 | 115/18903 | 0.000113049              | 0.0009171              | 0.00058771               | JUN/ECM1/NR4A1/FGFR1/NR                            | 21 0.182608695652174 |
| GO:0070304 BP | GO:0070304 positive               | 23/1414 | 132/18903 | 0.000114987              | 0.0009315              | 0.00059695               | GADD45B/GADD45G/TRPV4/I                            | 23 0.174242424242424 |
| GO:0030728 BP | GO:0030728 ovulation              | 8/1414  | 22/18903  | 0.000118741              | 0.0009553              | 0.00061219               | MMP2/INHBA/PTGS2/TNFAIP                            | 8 0.363636363636364  |
| GO:0032928 BP | GO:0032928 regulation of          | 8/1414  | 22/18903  | 0.000118741              | 0.0009553              | 0.00061219               | TGFB1/TYROBP/ITGB2/CLEC                            | 8 0.363636363636364  |
| GO:0060713 BP | GO:0060713 labyrinthine           | 8/1414  | 22/18903  | 0.000118741              | 0.0009553              | 0.00061219               | SOCS3/ZFP36L1/SPINT2/AD                            | 8 0.363636363636364  |
| GO:0072574 BP | GO:0072574 hepatocyte             | 8/1414  | 22/18903  | 0.000118741              | 0.0009553              | 0.00061219               | NOTCH2/PTN/CFLAR/XBP1/F                            | 8 0.363636363636364  |
| GO:0072575 BP | GO:0072575 epithelial             | 8/1414  | 22/18903  | 0.000118741              | 0.0009553              | 0.00061219               | NOTCH2/PTN/CFLAR/XBP1/F                            | 8 0.363636363636364  |
| GO:0006882 BP | GO:0006882 cellular zinc          | 11/1414 | 40/18903  | 0.000120225              | 0.0009619              | 0.00061644               | MT1G/MT1M/MT1A/MT1E/MT1                            | 11 0.275             |
| GO:0010762 BP | GO:0010762 regulation of          | 11/1414 | 40/18903  | 0.000120225              | 0.0009619              | 0.00061644               | AQP1/FGF2/TGFB1/SDC4/SL                            | 11 0.275             |
| GO:0030866 BP | GO:0030866 cortical               | 11/1414 | 40/18903  | 0.000120225              | 0.0009619              | 0.00061644               | EPB41L2/RAB13/LCP1/PLEK                            | 11 0.275             |
| GO:0035886 BP | GO:0035886 vascular               | 11/1414 | 40/18903  | 0.000120225              | 0.0009619              | 0.00061644               | SGCB/COMP/HES1/SOD2/VEG                            | 11 0.275             |
| GO:0043550 BP | GO:0043550 regulation of          | 15/1414 | 68/18903  | 0.000120841              | 0.0009655              | 0.00061875               | PDGFRA/SOCS3/PDGFRB/PIK                            | 15 0.220588235294118 |
| GO:1903729 BP | GO:1903729 regulation of          | 7/1414  | 17/18903  | 0.000128596              | 0.0010256              | 0.00065722               | GSN/ANXA2/S100A10/MYH9/                            | 7 0.411764705882353  |
| GO:0034113 BP | GO:0034113 heterotypic            | 14/1414 | 61/18903  | 0.000128706              | 0.0010256              | 0.00065722               | THY1/GLDN/VCAM1/CD44/IT                            | 14 0.229508196721311 |
| GO:0050821 BP | GO:0050821 protein                | 32/1414 | 214/18903 | 0.000131382              | 0.0010455              | 0.00066997               | SOX4/FLNA/LAMP2/HSPA1A/                            | 32 0.149532710280374 |
| GO:0003382 BP | GO:0003382 epithelial             | 10/1414 | 34/18903  | 0.000131897              | 0.0010467              | 0.00067077               | FRMD6/COL15A1/SPINT2/RO                            | 10 0.294117647058824 |
| GO:0090322 BP | GO:0090322 regulation of          | 10/1414 | 34/18903  | 0.000131897              | 0.0010467              | 0.00067077               | H19/TGFB1/TYROBP/ITGB2/                            | 10 0.294117647058824 |
| GO:0032330 BP | GO:0032330 regulation of          | 13/1414 | 54/18903  | 0.000132654              | 0.0010498              | 0.00067279               | GLI3/EFEMP1/LTBP3/SOX5/                            | 13 0.240740740740741 |
| GO:1902743 BP | GO:1902743 regulation of          | 13/1414 | 54/18903  | 0.000132654              | 0.0010498              | 0.00067279               | CAPZB/PDPN/PIK3R1/CD44/                            | 13 0.240740740740741 |
| GO:1903320 BP | GO:1903320 regulation of          | 36/1414 | 252/18903 | 0.000133575              | 0.0010537              | 0.00067529               | EGR1/SOX4/HSPA1A/UBB/UB                            | 36 0.142857142857143 |
| GO:0010714 BP | GO:0010714 positive               | 9/1414  | 28/18903  | 0.000133830              | 0.0010537              | 0.00067529               | PDGFRB/RUNX1/INHBA/LARP                            | 9 0.321428571428571  |
| GO:0032703 BP | GO:0032703 negative               | 9/1414  | 28/18903  | 0.000133830              | 0.0010537              | 0.00067529               | LAG3/ZFP36/LAPTM5/PTPRC                            | 9 0.321428571428571  |
| GO:0060560 BP | GO:0060560 developmental          | 34/1414 | 233/18903 | 0.000133869              | 0.0010537              | 0.00067529               | SEMA3C/SIX1/NTN1/SPP1/N                            | 34 0.145922746781116 |
| GO:0034620 BP | GO:0034620 cellular               | 19/1414 | 100/18903 | 0.000137007              | 0.0010755              | 0.00068926               | HSPA1A/HSPA1B/HSPA8/DDI                            | 19 0.19              |
| GO:0098869 BP | GO:0098869 cellular               | 19/1414 | 100/18903 | 0.000137007              | 0.0010755              | 0.00068926               | GPX8/H19/PRDX4/GPX3/SOD                            | 19 0.19              |
| GO:0045664 BP | GO:0045664 regulation of          | 30/1414 | 196/18903 | 0.000137876              | 0.0010809              | 0.00069269               | NBL1/TCF4/SIX1/ID4/ZFHX                            | 30 0.153061224489796 |
| GO:0002221 BP | GO:0002221 pattern                | 29/1414 | 187/18903 | 0.000140096              | 0.0010956              | 0.00070214               | MAP2K6/PLCG2/HSPA1A/HSP                            | 29 0.155080213903743 |
| GO:0001818 BP | GO:0001818 negative regulation of | 48/1414 | 371/18903 | 0.000140131<br>690136657 | 0.0010956<br>945691248 | 0.00070214<br>1430330564 | TWIST1/GPNMB/LAG3/ZFP36<br>/DDIT3/APOD/NDRG2/FN1/I | 48 0.129380053908356 |
| GO:0046632 BP | GO:0046632 alpha-beta T           | 21/1414 | 117/18903 | 0.000145723              | 0.0011378              | 0.00072918               | FOXP1/RUNX1/GLI3/JUNB/Z                            | 21 0.179487179487179 |
| GO:0048511 BP | GO:0048511 rhythmic               | 41/1414 | 302/18903 | 0.000149086              | 0.0011625              | 0.00074501               | MMP2/EGR1/PDGFRB/TWIST1                            | 41 0.135761589403974 |
| GO:0019221 BP | GO:0019221 cytokine-mediated      | 60/1414 | 496/18903 | 0.000150341<br>261533139 | 0.0011708<br>151916192 | 0.00075028<br>012044716  | EGR1/ECM1/IFITM1/HSPA1A<br>/HSPA1B/NFKBIA/OSMR/IFI | 60 0.120967741935484 |
| GO:0046545 BP | GO:0046545 development            | 20/1414 | 109/18903 | 0.000152308              | 0.0011845              | 0.00075908               | MMP2/PDGFRB/COL9A3/UBB/                            | 20 0.18348623853211  |

|               |                                  |         |           |             |           |            |                                                |    |                   |
|---------------|----------------------------------|---------|-----------|-------------|-----------|------------|------------------------------------------------|----|-------------------|
| GO:0001914 BP | GO:0001914 regulation of         | 11/1414 | 41/18903  | 0.000153298 | 0.0011906 | 0.00076299 | HLA-DRB1/HLA-                                  | 11 | 0.268292682926829 |
| GO:1903036 BP | GO:1903036 positive              | 16/1414 | 77/18903  | 0.000153623 | 0.0011916 | 0.00076360 | ACTG1/FLNA/SMOC2/PTN/XB                        | 16 | 0.207792207792208 |
| GO:0030183 BP | GO:0030183 B cell                | 25/1414 | 152/18903 | 0.000154322 | 0.0011954 | 0.00076605 | ZFP36L1/KLF6/LGALS1/RBP                        | 25 | 0.164473684210526 |
| GO:0022617 BP | GO:0022617 extracellular         | 14/1414 | 62/18903  | 0.000154938 | 0.0011970 | 0.00076707 | MMP2/CTSK/FAP/MELTF/PDP                        | 14 | 0.225806451612903 |
| GO:0045428 BP | GO:0045428 regulation of         | 14/1414 | 62/18903  | 0.000154938 | 0.0011970 | 0.00076707 | SOD2/PTGS2/CAV1/HSP90AA                        | 14 | 0.225806451612903 |
| GO:0003231 BP | GO:0003231 cardiac               | 22/1414 | 126/18903 | 0.000155497 | 0.0011997 | 0.00076882 | SOX4/SEMA3C/RBPJ/TPM1/H                        | 22 | 0.174603174603175 |
| GO:0030900 BP | GO:0030900 forebrain development | 49/1414 | 383/18903 | 0.000157810 | 0.0012159 | 0.00077923 | COL3A1/FAT4/FOXP1/AQP1/RBPJ/ID4/ZEB1/GLI3/CDON | 49 | 0.127937336814621 |
| GO:0071320 BP | GO:0071320 cellular              | 13/1414 | 55/18903  | 0.000161950 | 0.0012446 | 0.00079757 | ZFP36L1/AQP1/HSPA5/AHR/                        | 13 | 0.236363636363636 |
| GO:1904645 BP | GO:1904645 response to           | 13/1414 | 55/18903  | 0.000161950 | 0.0012446 | 0.00079757 | MMP2/GJA1/MMP3/VCAM1/IC                        | 13 | 0.236363636363636 |
| GO:0002819 BP | GO:0002819 regulation of         | 30/1414 | 198/18903 | 0.000165764 | 0.0012722 | 0.00081527 | JUNB/CD55/TGFB1/ANXA1/A                        | 30 | 0.151515151515152 |
| GO:0050650 BP | GO:0050650 chondroitin           | 8/1414  | 23/18903  | 0.000170179 | 0.0013009 | 0.00083370 | DSE/CYTL1/XYL1/CHST3/C                         | 8  | 0.347826086956522 |
| GO:0072576 BP | GO:0072576 liver                 | 8/1414  | 23/18903  | 0.000170179 | 0.0013009 | 0.00083370 | NOTCH2/PTN/CFLAR/XBP1/F                        | 8  | 0.347826086956522 |
| GO:0150146 BP | GO:0150146 cell junction         | 8/1414  | 23/18903  | 0.000170179 | 0.0013009 | 0.00083370 | PIK3R1/C1QC/C1QA/C1QB/I                        | 8  | 0.347826086956522 |
| GO:0043627 BP | GO:0043627 response to           | 15/1414 | 70/18903  | 0.000170606 | 0.0013025 | 0.00083469 | MMP2/PDGFRB/GLI3/TNFRSF                        | 15 | 0.214285714285714 |
| GO:0050654 BP | GO:0050654 chondroitin           | 10/1414 | 35/18903  | 0.000172370 | 0.0013091 | 0.00083893 | DSEL/DSE/CYTL1/XYL1/CH                         | 10 | 0.285714285714286 |
| GO:0090050 BP | GO:0090050 positive              | 10/1414 | 35/18903  | 0.000172370 | 0.0013091 | 0.00083893 | FGF2/PTGS2/ANXA1/VEGFA/                        | 10 | 0.285714285714286 |
| GO:2000352 BP | GO:2000352 negative              | 10/1414 | 35/18903  | 0.000172370 | 0.0013091 | 0.00083893 | ANGPTL4/ICAM1/NDNF/NFE2                        | 10 | 0.285714285714286 |
| GO:2000406 BP | GO:2000406 positive              | 10/1414 | 35/18903  | 0.000172370 | 0.0013091 | 0.00083893 | SELENOK/CCL20/AIF1/PYCA                        | 10 | 0.285714285714286 |
| GO:0032869 BP | GO:0032869 cellular              | 31/1414 | 208/18903 | 0.000176497 | 0.0013387 | 0.00085790 | SOCS3/ZFP36L1/PIK3R3/FO                        | 31 | 0.149038461538462 |
| GO:0008630 BP | GO:0008630 intrinsic             | 19/1414 | 102/18903 | 0.000179750 | 0.0013616 | 0.00087258 | CRIP1/SNAI1/SOD2/PIK3R1                        | 19 | 0.186274509803922 |
| GO:0097066 BP | GO:0097066 response to           | 9/1414  | 29/18903  | 0.000181253 | 0.0013712 | 0.00087873 | HES1/CTSL/CTSS/CTSH/CTS                        | 9  | 0.310344827586207 |
| GO:0032092 BP | GO:0032092 positive              | 17/1414 | 86/18903  | 0.000184053 | 0.0013906 | 0.00089115 | CTHRC1/BMP2/RAN/ANXA2/C                        | 17 | 0.197674418604651 |
| GO:0034333 BP | GO:0034333 adherens              | 6/1414  | 13/18903  | 0.000187933 | 0.0014126 | 0.00090525 | ACTB/PAK2/HIPK1/SMAD7/V                        | 6  | 0.461538461538462 |
| GO:0034616 BP | GO:0034616 response to           | 6/1414  | 13/18903  | 0.000187933 | 0.0014126 | 0.00090525 | KLF2/KLF4/ABCA1/NFE2L2/                        | 6  | 0.461538461538462 |
| GO:0070424 BP | GO:0070424 regulation of         | 6/1414  | 13/18903  | 0.000187933 | 0.0014126 | 0.00090525 | HSPA1A/HSPA1B/BIRC2/TLR                        | 6  | 0.461538461538462 |
| GO:0072310 BP | GO:0072310 glomerular            | 6/1414  | 13/18903  | 0.000187933 | 0.0014126 | 0.00090525 | NOTCH2/MAGI2/IQGAP1/JAG                        | 6  | 0.461538461538462 |
| GO:1905475 BP | GO:1905475 regulation of         | 27/1414 | 172/18903 | 0.000191017 | 0.0014339 | 0.00091892 | DAB2/ACTB/ANK3/GPC6/GSN                        | 27 | 0.156976744186047 |
| GO:0010591 BP | GO:0010591 regulation of         | 11/1414 | 42/18903  | 0.000193785 | 0.0014491 | 0.00092865 | CAPZB/PIK3R1/HSP90AA1/A                        | 11 | 0.261904761904762 |
| GO:0034142 BP | GO:0034142 toll-like             | 11/1414 | 42/18903  | 0.000193785 | 0.0014491 | 0.00092865 | NFKBIA/NR1D1/PELI1/CD14                        | 11 | 0.261904761904762 |
| GO:0055069 BP | GO:0055069 zinc ion              | 11/1414 | 42/18903  | 0.000193785 | 0.0014491 | 0.00092865 | MT1G/MT1M/MT1A/MT1E/MT1                        | 11 | 0.261904761904762 |
| GO:0001954 BP | GO:0001954 positive              | 13/1414 | 56/18903  | 0.000196637 | 0.0014573 | 0.00093387 | THY1/RIN2/SDC4/VEGFA/NR                        | 13 | 0.232142857142857 |
| GO:0010718 BP | GO:0010718 positive              | 13/1414 | 56/18903  | 0.000196637 | 0.0014573 | 0.00093387 | COL1A1/TWIST1/DAB2/SNAI                        | 13 | 0.232142857142857 |
| GO:0043370 BP | GO:0043370 regulation of         | 13/1414 | 56/18903  | 0.000196637 | 0.0014573 | 0.00093387 | RUNX1/JUNB/ANXA1/NFKBIZ                        | 13 | 0.232142857142857 |
| GO:0030510 BP | GO:0030510 regulation of         | 20/1414 | 111/18903 | 0.000196756 | 0.0014573 | 0.00093387 | NBL1/FSTL1/RBPJ/FBN1/NO                        | 20 | 0.18018018018018  |
| GO:0071347 BP | GO:0071347 cellular              | 20/1414 | 111/18903 | 0.000196756 | 0.0014573 | 0.00093387 | MMP2/EGR1/HES1/GBP2/NR1                        | 20 | 0.18018018018018  |

|               |                                  |         |           |             |           |            |                              |    |                   |
|---------------|----------------------------------|---------|-----------|-------------|-----------|------------|------------------------------|----|-------------------|
| GO:0030206 BP | GO:0030206 chondroitin           | 7/1414  | 18/18903  | 0.000196873 | 0.0014573 | 0.00093387 | DSE/XYLT1/CHST3/CSGALNA      | 7  | 0.388888888888889 |
| GO:0036035 BP | GO:0036035 osteoclast            | 7/1414  | 18/18903  | 0.000196873 | 0.0014573 | 0.00093387 | FOXP1/FBN1/NOTCH2/FAM20      | 7  | 0.388888888888889 |
| GO:0097067 BP | GO:0097067 cellular              | 7/1414  | 18/18903  | 0.000196873 | 0.0014573 | 0.00093387 | CTSL/CTSS/CTSH/CTSB/KLF      | 7  | 0.388888888888889 |
| GO:0033628 BP | GO:0033628 regulation of         | 12/1414 | 49/18903  | 0.000200573 | 0.0014809 | 0.00094901 | PIEZO1/LYN/FERMT3/NCKAP      | 12 | 0.244897959183673 |
| GO:2000404 BP | GO:2000404 regulation of         | 12/1414 | 49/18903  | 0.000200573 | 0.0014809 | 0.00094901 | ECM1/APOD/SELENOK/CCL20      | 12 | 0.244897959183673 |
| GO:1903510 BP | GO:1903510 mucopolysacch         | 18/1414 | 95/18903  | 0.000210972 | 0.0015557 | 0.00099695 | DSEL/DSE/XYLT1/CHST3/CS      | 18 | 0.189473684210526 |
| GO:0021915 BP | GO:0021915 neural tube           | 26/1414 | 164/18903 | 0.000211855 | 0.0015602 | 0.00099986 | MARCKS/ZFP36L1/TWIST1/S      | 26 | 0.158536585365854 |
| GO:0001654 BP | GO:0001654 eye development       | 49/1414 | 388/18903 | 0.000215562 | 0.0015855 | 0.00101607 | COL5A1/COL5A2/JUN/THY1/PDGFR | 49 | 0.126288659793814 |
| GO:2000027 BP | GO:2000027 regulation of         | 22/1414 | 129/18903 | 0.000220684 | 0.0016212 | 0.00103891 | DAB2/SIX1/RSP02/CTHRC1/      | 22 | 0.170542635658915 |
| GO:0050869 BP | GO:0050869 negative              | 10/1414 | 36/18903  | 0.000222800 | 0.0016326 | 0.00104623 | INHBA/ID2/TYROBP/LAPTM5      | 10 | 0.277777777777778 |
| GO:0060323 BP | GO:0060323 head                  | 10/1414 | 36/18903  | 0.000222800 | 0.0016326 | 0.00104623 | COL1A1/MMP2/PDGFR/CRIS       | 10 | 0.277777777777778 |
| GO:1903038 BP | GO:1903038 negative              | 24/1414 | 147/18903 | 0.000232313 | 0.0017002 | 0.00108953 | GPNMB/RUNX1/GLI3/LAG3/S      | 24 | 0.163265306122449 |
| GO:0035914 BP | GO:0035914 skeletal              | 15/1414 | 72/18903  | 0.000237226 | 0.0017316 | 0.00110969 | EGR1/FOS/SIX1/CDON/NR4A      | 15 | 0.208333333333333 |
| GO:0008347 BP | GO:0008347 glial cell            | 13/1414 | 57/18903  | 0.000237501 | 0.0017316 | 0.00110969 | COL3A1/GLI3/NTN1/CSPG4/      | 13 | 0.228070175438596 |
| GO:0043388 BP | GO:0043388 positive              | 13/1414 | 57/18903  | 0.000237501 | 0.0017316 | 0.00110969 | TWIST1/HES1/TXN/TGFB1/C      | 13 | 0.228070175438596 |
| GO:0036303 BP | GO:0036303 lymph vessel          | 8/1414  | 24/18903  | 0.000238616 | 0.0017354 | 0.00111212 | PDPN/FGF2/VEGFA/PKD1/CL      | 8  | 0.333333333333333 |
| GO:0071294 BP | GO:0071294 cellular              | 8/1414  | 24/18903  | 0.000238616 | 0.0017354 | 0.00111212 | MT1G/MT1M/MT1A/MT1E/MT1      | 8  | 0.333333333333333 |
| GO:0010464 BP | GO:0010464 regulation of         | 9/1414  | 30/18903  | 0.000241866 | 0.0017503 | 0.00112167 | LMNA/SIX1/PRRX1/ZEB1/FG      | 9  | 0.3               |
| GO:0030204 BP | GO:0030204 chondroitin           | 9/1414  | 30/18903  | 0.000241866 | 0.0017503 | 0.00112167 | DSEL/DSE/XYLT1/CHST3/CS      | 9  | 0.3               |
| GO:0060325 BP | GO:0060325 face                  | 9/1414  | 30/18903  | 0.000241866 | 0.0017503 | 0.00112167 | COL1A1/MMP2/PDGFR/CRIS       | 9  | 0.3               |
| GO:0070168 BP | GO:0070168 negative              | 9/1414  | 30/18903  | 0.000241866 | 0.0017503 | 0.00112167 | ECM1/ASPN/LTBP3/TGFB1/R      | 9  | 0.3               |
| GO:0002347 BP | GO:0002347 response to           | 11/1414 | 43/18903  | 0.000242971 | 0.0017562 | 0.00112540 | NOTCH2/TXNIP/HSPD1/KLF4      | 11 | 0.255813953488372 |
| GO:0035023 BP | GO:0035023 regulation of         | 17/1414 | 88/18903  | 0.000245948 | 0.0017755 | 0.00113778 | COL3A1/PDGFR/LPAR1/EP        | 17 | 0.193181818181818 |
| GO:0002456 BP | GO:0002456 T cell                | 20/1414 | 113/18903 | 0.000252212 | 0.0018184 | 0.00116531 | CD55/ICAM1/HSPD1/HLA-        | 20 | 0.176991150442478 |
| GO:0048754 BP | GO:0048754 branching             | 25/1414 | 157/18903 | 0.000259178 | 0.0018644 | 0.00119475 | SIX1/RSP02/GLI3/BMP2/FG      | 25 | 0.159235668789809 |
| GO:0043010 BP | GO:0043010 camera-type eye       | 44/1414 | 340/18903 | 0.000259221 | 0.0018644 | 0.00119475 | JUN/THY1/PDGFR/AQP1/PD       | 44 | 0.129411764705882 |
| GO:0048857 BP | GO:0048857 neural                | 14/1414 | 65/18903  | 0.000263132 | 0.0018878 | 0.00120979 | ACTB/S100A1/NDRG2/FGF2/      | 14 | 0.215384615384615 |
| GO:0080164 BP | GO:0080164 regulation of         | 14/1414 | 65/18903  | 0.000263132 | 0.0018878 | 0.00120979 | SOD2/PTGS2/CAV1/HSP90A       | 14 | 0.215384615384615 |
| GO:0008585 BP | GO:0008585 female gonad          | 19/1414 | 105/18903 | 0.000265734 | 0.0019042 | 0.00122025 | MMP2/PDGFR/COL9A3/UBB/       | 19 | 0.180952380952381 |
| GO:0071901 BP | GO:0071901 negative              | 21/1414 | 122/18903 | 0.000266383 | 0.0019065 | 0.00122173 | HEXIM1/DNAJA1/BMP2/CDKN      | 21 | 0.172131147540984 |
| GO:0031345 BP | GO:0031345 negative              | 29/1414 | 194/18903 | 0.000267031 | 0.0019088 | 0.00122320 | THY1/CAPZB/SEMA3C/DAB2/      | 29 | 0.149484536082474 |
| GO:0042176 BP | GO:0042176 regulation of protein | 46/1414 | 361/18903 | 0.000270873 | 0.0019339 | 0.00123928 | DAB2/TIMP2/FLNA/TIMP4/F      | 46 | 0.127423822714681 |
| GO:0032984 BP | GO:0032984 protein-              | 34/1414 | 242/18903 | 0.000278301 | 0.0019845 | 0.00127171 | OXO1/HSPA1A/UBB/HSPA1B/      | 34 | 0.140495867768595 |

|               |                          |         |           |             |           |            |                         |                      |
|---------------|--------------------------|---------|-----------|-------------|-----------|------------|-------------------------|----------------------|
| GO:0002335 BP | GO:0002335 mature B cell | 10/1414 | 37/18903  | 0.000285035 | 0.0020251 | 0.00129772 | LGALS1/NOTCH2/PLCG2/ITM | 10 0.27027027027027  |
| GO:0034110 BP | GO:0034110 regulation of | 10/1414 | 37/18903  | 0.000285035 | 0.0020251 | 0.00129772 | ANK3/PDPN/SERPINE2/PLAU | 10 0.27027027027027  |
| GO:1902745 BP | GO:1902745 positive      | 10/1414 | 37/18903  | 0.000285035 | 0.0020251 | 0.00129772 | PIK3R1/HSP90AA1/ARPC2/T | 10 0.27027027027027  |
| GO:0002483 BP | GO:0002483 antigen       | 7/1414  | 19/18903  | 0.000291659 | 0.0020596 | 0.00131984 | HLA-DRB1/HLA-           | 7 0.368421052631579  |
| GO:0010759 BP | GO:0010759 positive      | 7/1414  | 19/18903  | 0.000291659 | 0.0020596 | 0.00131984 | TRPV4/CSF1R/C3AR1/C5AR1 | 7 0.368421052631579  |
| GO:0010801 BP | GO:0010801 negative      | 7/1414  | 19/18903  | 0.000291659 | 0.0020596 | 0.00131984 | CALM2/SPRY2/DDIT4/SPRED | 7 0.368421052631579  |
| GO:0032026 BP | GO:0032026 response to   | 7/1414  | 19/18903  | 0.000291659 | 0.0020596 | 0.00131984 | ANK3/TNFRSF11B/BMP6/CCN | 7 0.368421052631579  |
| GO:0043031 BP | GO:0043031 negative      | 7/1414  | 19/18903  | 0.000291659 | 0.0020596 | 0.00131984 | NR1D1/PTPRC/VSIG4/FCGR2 | 7 0.368421052631579  |
| GO:0001709 BP | GO:0001709 cell fate     | 11/1414 | 44/18903  | 0.000302295 | 0.0021295 | 0.00136467 | PRRX1/NOTCH2/TNXB/HES1/ | 11 0.25              |
| GO:0071526 BP | GO:0071526 semaphorin-   | 11/1414 | 44/18903  | 0.000302295 | 0.0021295 | 0.00136467 | SEMA3C/FLNA/NRP2/NRP1/P | 11 0.25              |
| GO:0042117 BP | GO:0042117 monocyte      | 6/1414  | 14/18903  | 0.000308090 | 0.0021599 | 0.00138414 | FOXP1/MT1G/FN1/ADAM9/AD | 6 0.428571428571429  |
| GO:0043301 BP | GO:0043301 negative      | 6/1414  | 14/18903  | 0.000308090 | 0.0021599 | 0.00138414 | RABGEF1/SPI1/CD84/FCGR2 | 6 0.428571428571429  |
| GO:0071801 BP | GO:0071801 regulation of | 6/1414  | 14/18903  | 0.000308090 | 0.0021599 | 0.00138414 | GSN/LCP1/RHOA/MSN/ASAP1 | 6 0.428571428571429  |
| GO:1902043 BP | GO:1902043 positive      | 6/1414  | 14/18903  | 0.000308090 | 0.0021599 | 0.00138414 | PEA15/ATF3/PMAIP1/STK4/ | 6 0.428571428571429  |
| GO:0010812 BP | GO:0010812 negative      | 14/1414 | 66/18903  | 0.000311303 | 0.0021746 | 0.00139355 | COL1A1/MELTF/APOD/SPOCK | 14 0.212121212121212 |
| GO:0031343 BP | GO:0031343 positive      | 14/1414 | 66/18903  | 0.000311303 | 0.0021746 | 0.00139355 | CADM1/LAG3/HLA-         | 14 0.212121212121212 |
| GO:0060389 BP | GO:0060389 pathway-      | 14/1414 | 66/18903  | 0.000311303 | 0.0021746 | 0.00139355 | DAB2/GDF10/BMP2/SDCBP/I | 14 0.212121212121212 |
| GO:0120162 BP | GO:0120162 positive      | 18/1414 | 98/18903  | 0.000315400 | 0.0021953 | 0.00140684 | GJA1/DIO2/GADD45G/LCN2/ | 18 0.183673469387755 |
| GO:1990868 BP | GO:1990868 response to   | 18/1414 | 98/18903  | 0.000315400 | 0.0021953 | 0.00140684 | CCL20/CCL3/CCL3L1/CXCL8 | 18 0.183673469387755 |
| GO:1990869 BP | GO:1990869 cellular      | 18/1414 | 98/18903  | 0.000315400 | 0.0021953 | 0.00140684 | CCL20/CCL3/CCL3L1/CXCL8 | 18 0.183673469387755 |
| GO:0030010 BP | GO:0030010 establishment | 24/1414 | 150/18903 | 0.000316968 | 0.0022036 | 0.00141215 | GJA1/HES1/GSN/SPRY2/HSP | 24 0.16              |
| GO:0110150 BP | GO:0110150 negative      | 9/1414  | 31/18903  | 0.000318366 | 0.0022061 | 0.00141375 | ECM1/ASPN/LTBP3/TGFB1/R | 9 0.290322580645161  |
| GO:1900745 BP | GO:1900745 positive      | 9/1414  | 31/18903  | 0.000318366 | 0.0022061 | 0.00141375 | GADD45B/GADD45G/BMP2/VE | 9 0.290322580645161  |
| GO:0007369 BP | GO:0007369 gastrulation  | 29/1414 | 196/18903 | 0.000318462 | 0.0022061 | 0.00141375 | MMP2/COL12A1/COL5A1/GJA | 29 0.147959183673469 |
| GO:0051146 BP | GO:0051146 striated      | 39/1414 | 293/18903 | 0.000321028 | 0.0022213 | 0.00142345 | PDGFRA/FOXP1/PDGFRB/LMN | 39 0.133105802047782 |
| GO:0055006 BP | GO:0055006 cardiac cell  | 17/1414 | 90/18903  | 0.000325179 | 0.0022447 | 0.00143847 | PDGFRA/FOXP1/PDGFRB/LMN | 17 0.188888888888889 |
| GO:0030330 BP | GO:0030330 DNA damage    | 15/1414 | 74/18903  | 0.000325186 | 0.0022447 | 0.00143847 | TWIST1/SOX4/SNAI1/NDRG1 | 15 0.202702702702703 |
| GO:0001911 BP | GO:0001911 negative      | 8/1414  | 25/18903  | 0.000328037 | 0.0022590 | 0.00144766 | PTPRC/ARRB2/FCGR2B/NCKA | 8 0.32               |
| GO:0070423 BP | GO:0070423 nucleotide-   | 8/1414  | 25/18903  | 0.000328037 | 0.0022590 | 0.00144766 | MAP2K6/HSPA1A/HSPA1B/NF | 8 0.32               |
| GO:0043242 BP | GO:0043242 negative      | 16/1414 | 82/18903  | 0.000329099 | 0.0022610 | 0.00144892 | CAPZB/LIMA1/SCIN/GSN/TW | 16 0.195121951219512 |
| GO:0048708 BP | GO:0048708 astrocyte     | 16/1414 | 82/18903  | 0.000329099 | 0.0022610 | 0.00144892 | ID4/TSPAN2/HES1/NR1D1/S | 16 0.195121951219512 |
| GO:0046660 BP | GO:0046660 female sex    | 21/1414 | 124/18903 | 0.000335063 | 0.0022993 | 0.00147344 | MMP2/PDGFRB/COL9A3/UBB/ | 21 0.169354838709677 |
| GO:0010717 BP | GO:0010717 regulation of | 19/1414 | 107/18903 | 0.000341294 | 0.0023314 | 0.00149401 | COL1A1/TWIST1/DAB2/SNAI | 19 0.177570093457944 |
| GO:0062207 BP | GO:0062207 regulation of | 19/1414 | 107/18903 | 0.000341294 | 0.0023314 | 0.00149401 | HSPA1A/HSPA1B/NR1D1/PEL | 19 0.177570093457944 |
| GO:0001912 BP | GO:0001912 positive      | 13/1414 | 59/18903  | 0.000341337 | 0.0023314 | 0.00149401 | CADM1/LAG3/HLA-         | 13 0.220338983050847 |
| GO:0045010 BP | GO:0045010 actin         | 13/1414 | 59/18903  | 0.000341337 | 0.0023314 | 0.00149401 | SCIN/GSN/GMFG/IQGAP2/AR | 13 0.220338983050847 |

|               |                                 |         |           |                        |                        |                         |                                                    |    |                   |
|---------------|---------------------------------|---------|-----------|------------------------|------------------------|-------------------------|----------------------------------------------------|----|-------------------|
| GO:0010977 BP | GO:0010977 negative             | 23/1414 | 142/18903 | 0.000349416            | 0.0023810              | 0.00152579              | THY1/SEMA3C/DAB2/FLNA/D                            | 23 | 0.161971830985915 |
| GO:0014074 BP | GO:0014074 response to          | 23/1414 | 142/18903 | 0.000349416            | 0.0023810              | 0.00152579              | COL1A1/FOSB/ZFP36L1/AQP                            | 23 | 0.161971830985915 |
| GO:2001237 BP | GO:2001237 negative             | 18/1414 | 99/18903  | 0.000358998            | 0.0024434              | 0.00156581              | LMNA/HSPA1A/COL2A1/HSPA                            | 18 | 0.181818181818182 |
| GO:0043516 BP | GO:0043516 regulation of        | 10/1414 | 38/18903  | 0.000361155            | 0.0024524              | 0.00157155              | TWIST1/SOX4/SNAI1/CD44/                            | 10 | 0.263157894736842 |
| GO:0045920 BP | GO:0045920 negative             | 10/1414 | 38/18903  | 0.000361155            | 0.0024524              | 0.00157155              | ANXA1/RABGEF1/SPI1/CD84                            | 10 | 0.263157894736842 |
| GO:0021872 BP | GO:0021872 forebrain            | 12/1414 | 52/18903  | 0.000364062            | 0.0024664              | 0.00158051              | GLI3/HES1/UBB/NRP2/INHB                            | 12 | 0.230769230769231 |
| GO:0051496 BP | GO:0051496 positive             | 12/1414 | 52/18903  | 0.000364062            | 0.0024664              | 0.00158051              | TPM1/RHOC/SDC4/LPAR1/RG                            | 12 | 0.230769230769231 |
| GO:1901224 BP | GO:1901224 positive             | 14/1414 | 67/18903  | 0.000366830            | 0.0024822              | 0.00159069              | RPS3/LAPTM5/CD14/CD86/T                            | 14 | 0.208955223880597 |
| GO:0060021 BP | GO:0060021 roof of mouth        | 17/1414 | 91/18903  | 0.000372478            | 0.0025118              | 0.00160965              | PDGFRA/TWIST1/PRRX1/GLI                            | 17 | 0.186813186813187 |
| GO:0010712 BP | GO:0010712 regulation of        | 11/1414 | 45/18903  | 0.000373356            | 0.0025118              | 0.00160965              | PDGFRB/RUNX1/FAP/INHBA/                            | 11 | 0.244444444444444 |
| GO:0010799 BP | GO:0010799 regulation of        | 11/1414 | 45/18903  | 0.000373356            | 0.0025118              | 0.00160965              | CHI3L1/TGFB1/CALM2/SPRY                            | 11 | 0.244444444444444 |
| GO:0030574 BP | GO:0030574 collagen             | 11/1414 | 45/18903  | 0.000373356            | 0.0025118              | 0.00160965              | MMP2/MRC2/CTSK/FAP/RETR                            | 11 | 0.244444444444444 |
| GO:0062208 BP | GO:0062208 positive             | 11/1414 | 45/18903  | 0.000373356            | 0.0025118              | 0.00160965              | HSPA1A/HSPA1B/PELI1/CAV                            | 11 | 0.244444444444444 |
| GO:1904375 BP | GO:1904375 regulation of        | 21/1414 | 125/18903 | 0.000374870            | 0.0025191              | 0.00161431              | EPB41L2/DAB2/ACTB/GPC6/                            | 21 | 0.168             |
| GO:0090257 BP | GO:0090257 regulation of        | 35/1414 | 256/18903 | 0.000384912            | 0.0025836              | 0.00165565              | FOXP1/LMNA/MYL9/TPM1/FO                            | 35 | 0.13671875        |
| GO:2001056 BP | GO:2001056 positive             | 23/1414 | 143/18903 | 0.000387498            | 0.0025980              | 0.00166485              | GSN/CFLAR/CYCS/RPS3/HSP                            | 23 | 0.160839160839161 |
| GO:0043123 BP | GO:0043123 positive             | 28/1414 | 189/18903 | 0.000392078            | 0.0026257              | 0.00168260              | GJA1/S100A4/ECM1/LGALS1                            | 28 | 0.148148148148148 |
| GO:0009615 BP | GO:0009615 response to<br>virus | 50/1414 | 409/18903 | 0.000404771<br>6657361 | 0.0027076<br>067961452 | 0.00173508<br>472359837 | NPC2/HTRA1/H19/IFITM1/R<br>PS15A/IVNS1ABP/IFITM2/S | 50 | 0.122249388753056 |
| GO:0043406 BP | GO:0043406 positive             | 20/1414 | 117/18903 | 0.000405368            | 0.0027084              | 0.00173565              | PDGFRB/MAP2K6/FGFR1/FGF                            | 20 | 0.170940170940171 |
| GO:0009144 BP | GO:0009144 purine               | 34/1414 | 247/18903 | 0.000408213            | 0.0027243              | 0.00174583              | NT5E/H19/NDUFB1/ATP5ME/                            | 34 | 0.137651821862348 |
| GO:0046685 BP | GO:0046685 response to          | 9/1414  | 32/18903  | 0.000413800            | 0.0027522              | 0.00176367              | TNFRSF11B/GSTO1/ATF4/AT                            | 9  | 0.28125           |
| GO:0061384 BP | GO:0061384 heart                | 9/1414  | 32/18903  | 0.000413800            | 0.0027522              | 0.00176367              | RBPJ/RBP4/TGFBR3/FKBP1A                            | 9  | 0.28125           |
| GO:1990776 BP | GO:1990776 response to          | 9/1414  | 32/18903  | 0.000413800            | 0.0027522              | 0.00176367              | COL3A1/INHBA/PTGS2/CAV1                            | 9  | 0.28125           |
| GO:0032332 BP | GO:0032332 positive             | 7/1414  | 20/18903  | 0.000419871            | 0.0027830              | 0.00178344              | GLI3/SOX5/ZBTB16/BMP6/G                            | 7  | 0.35              |
| GO:0055093 BP | GO:0055093 response to          | 7/1414  | 20/18903  | 0.000419871            | 0.0027830              | 0.00178344              | COL1A1/MMP2/PDGFRB/FOXO                            | 7  | 0.35              |
| GO:1903978 BP | GO:1903978 regulation of        | 7/1414  | 20/18903  | 0.000419871            | 0.0027830              | 0.00178344              | NR1D1/PTPRC/CCL3/TREM2/                            | 7  | 0.35              |
| GO:0072091 BP | GO:0072091 regulation of        | 17/1414 | 92/18903  | 0.000425605            | 0.0028172              | 0.00180532              | GJA1/ZFP36L1/RBPJ/PRRX1                            | 17 | 0.184782608695652 |
| GO:2000347 BP | GO:2000347 positive             | 5/1414  | 10/18903  | 0.000425987            | 0.0028172              | 0.00180532              | PTN/CFLAR/XBP1/FGF1/TNF                            | 5  | 0.5               |
| GO:0030100 BP | GO:0030100 regulation of        | 30/1414 | 209/18903 | 0.000429417            | 0.0028366              | 0.00181779              | DAB2/PLCG2/TF/MAGI2/SDC                            | 30 | 0.143540669856459 |
| GO:0045670 BP | GO:0045670 regulation of        | 14/1414 | 68/18903  | 0.000430605            | 0.0028413              | 0.00182076              | MAFB/FOS/KLF10/FBN1/NOT                            | 14 | 0.205882352941176 |
| GO:0009409 BP | GO:0009409 response to          | 12/1414 | 53/18903  | 0.000438995            | 0.0028893              | 0.00185156              | FOS/DIO2/PCSK1N/FOXO1/N                            | 12 | 0.226415094339623 |
| GO:0048146 BP | GO:0048146 positive             | 12/1414 | 53/18903  | 0.000438995            | 0.0028893              | 0.00185156              | JUN/PDGFRB/AQP1/PDGFRB/                            | 12 | 0.226415094339623 |
| GO:0006809 BP | GO:0006809 nitric oxide         | 15/1414 | 76/18903  | 0.000439821            | 0.0028893              | 0.00185156              | SOD2/PTGS2/CAV1/HSP90AA                            | 15 | 0.197368421052632 |
| GO:0048863 BP | GO:0048863 stem cell            | 34/1414 | 248/18903 | 0.000439871            | 0.0028893              | 0.00185156              | PDGFRA/TWIST1/SEMA3C/LB                            | 34 | 0.137096774193548 |
| GO:0019883 BP | GO:0019883 antigen              | 8/1414  | 26/18903  | 0.000442983            | 0.0028967              | 0.00185630              | HLA-DRB1/HLA-                                      | 8  | 0.307692307692308 |

|               |                               |         |           |             |           |            |                         |       |                 |
|---------------|-------------------------------|---------|-----------|-------------|-----------|------------|-------------------------|-------|-----------------|
| GO:0035872 BP | GO:0035872 nucleotide-        | 8/1414  | 26/18903  | 0.000442983 | 0.0028967 | 0.00185630 | MAP2K6/HSPA1A/HSPA1B/NF | 8 0.  | 307692307692308 |
| GO:0060669 BP | GO:0060669 embryonic          | 8/1414  | 26/18903  | 0.000442983 | 0.0028967 | 0.00185630 | SOCS3/ZFP36L1/SPINT2/AD | 8 0.  | 307692307692308 |
| GO:0072010 BP | GO:0072010 glomerular         | 8/1414  | 26/18903  | 0.000442983 | 0.0028967 | 0.00185630 | NOTCH2/MAGI2/IQGAP1/JAG | 8 0.  | 307692307692308 |
| GO:0002286 BP | GO:0002286 T cell             | 20/1414 | 118/18903 | 0.000454425 | 0.0029682 | 0.00190212 | FOXP1/JUNB/ICAM1/ANXA1/ | 20 0. | 169491525423729 |
| GO:2001243 BP | GO:2001243 negative           | 18/1414 | 101/18903 | 0.000462080 | 0.0030148 | 0.00193199 | HSPA1A/SNAI1/DNAJA1/IVN | 18 0. | 178217821782178 |
| GO:0055001 BP | GO:0055001 muscle cell        | 28/1414 | 191/18903 | 0.000466234 | 0.0030385 | 0.00194718 | PDGFRA/FOXP1/PDGFRB/LMN | 28 0. | 146596858638743 |
| GO:0045834 BP | GO:0045834 positive           | 24/1414 | 154/18903 | 0.000471423 | 0.0030689 | 0.00196666 | PDGFRA/PDGFRB/TWIST1/DA | 24 0. | 155844155844156 |
| GO:0010649 BP | GO:0010649 regulation of      | 6/1414  | 15/18903  | 0.000481067 | 0.0031103 | 0.00199315 | ANK3/CALM2/CAV1/SLC8A1/ | 6     | 0.4             |
| GO:0032488 BP | GO:0032488 Cdc42 protein      | 6/1414  | 15/18903  | 0.000481067 | 0.0031103 | 0.00199315 | NTN1/APOE/SHTN1/NRP1/AB | 6     | 0.4             |
| GO:0061307 BP | GO:0061307 cardiac            | 6/1414  | 15/18903  | 0.000481067 | 0.0031103 | 0.00199315 | TWIST1/SEMA3C/HES1/CITE | 6     | 0.4             |
| GO:0061308 BP | GO:0061308 cardiac            | 6/1414  | 15/18903  | 0.000481067 | 0.0031103 | 0.00199315 | TWIST1/SEMA3C/HES1/CITE | 6     | 0.4             |
| GO:1902563 BP | GO:1902563 regulation of      | 6/1414  | 15/18903  | 0.000481067 | 0.0031103 | 0.00199315 | PLA2G2A/ITGB2/SPI1/ITGA | 6     | 0.4             |
| GO:2000345 BP | GO:2000345 regulation of      | 6/1414  | 15/18903  | 0.000481067 | 0.0031103 | 0.00199315 | PTN/CFLAR/XBP1/FGF1/LIM | 6     | 0.4             |
| GO:1900024 BP | GO:1900024 regulation of      | 13/1414 | 61/18903  | 0.000481505 | 0.0031103 | 0.00199315 | DAB2/FLNA/MELTF/PDPN/NR | 13 0. | 213114754098361 |
| GO:0051962 BP | GO:0051962 positive           | 37/1414 | 279/18903 | 0.000484276 | 0.0031247 | 0.00200240 | THBS2/PTPRD/ID4/GLI3/NT | 37 0. | 132616487455197 |
| GO:2000106 BP | GO:2000106 regulation of      | 17/1414 | 93/18903  | 0.000485141 | 0.0031268 | 0.00200376 | FOXP1/ANXA1/PRELI1/TCP  | 17 0. | 182795698924731 |
| GO:0008625 BP | GO:0008625 extrinsic          | 16/1414 | 85/18903  | 0.000501763 | 0.0032268 | 0.00206784 | PIK3R1/CFLAR/ICAM1/PEA1 | 16 0. | 188235294117647 |
| GO:0034103 BP | GO:0034103 regulation of      | 16/1414 | 85/18903  | 0.000501763 | 0.0032268 | 0.00206784 | GNMB/RUNX1/LTBP3/TF/SP  | 16 0. | 188235294117647 |
| GO:0048645 BP | GO:0048645 animal organ       | 14/1414 | 69/18903  | 0.000503593 | 0.0032350 | 0.00207310 | SIX1/RBPJ/GLI3/HES1/BMP | 14 0. | 202898550724638 |
| GO:0043297 BP | GO:0043297 apical             | 15/1414 | 77/18903  | 0.000509062 | 0.0032666 | 0.00209331 | SNAI1/RHOC/RAB13/AFDN/R | 15 0. | 194805194805195 |
| GO:0006936 BP | GO:0006936 muscle contraction | 44/1414 | 351/18903 | 0.000517427 | 0.0033166 | 0.00212537 | GJA1/CALD1/TPM4/MYL9/SS | 44 0. | 125356125356125 |
| GO:0043583 BP | GO:0043583 ear                | 31/1414 | 221/18903 | 0.000520104 | 0.0033301 | 0.00213402 | MAFB/PDGFRB/TWIST1/SIX1 | 31 0. | 14027149321267  |
| GO:0030857 BP | GO:0030857 negative           | 12/1414 | 54/18903  | 0.000526521 | 0.0033675 | 0.00215798 | ZEB1/HES1/FRZB/SPRY2/CA | 12 0. | 222222222222222 |
| GO:0048839 BP | GO:0048839 inner ear          | 28/1414 | 193/18903 | 0.000552466 | 0.0035296 | 0.00226184 | MAFB/PDGFRB/SIX1/RBPJ/P | 28 0. | 145077720207254 |
| GO:0034314 BP | GO:0034314 Arp2/3             | 11/1414 | 47/18903  | 0.000557940 | 0.0035451 | 0.00227181 | GMFG/IQGAP2/ARPC1B/ARPC | 11 0. | 234042553191489 |
| GO:0060711 BP | GO:0060711 labyrinthine       | 11/1414 | 47/18903  | 0.000557940 | 0.0035451 | 0.00227181 | SOCS3/ZFP36L1/RBPJ/HES1 | 11 0. | 234042553191489 |
| GO:0097028 BP | GO:0097028 dendritic          | 11/1414 | 47/18903  | 0.000557940 | 0.0035451 | 0.00227181 | RBPJ/NOTCH2/CEBPB/SPI1/ | 11 0. | 234042553191489 |
| GO:0120163 BP | GO:0120163 negative           | 11/1414 | 47/18903  | 0.000557940 | 0.0035451 | 0.00227181 | RBPJ/ACOT13/MAP2K6/DDIT | 11 0. | 234042553191489 |
| GO:1902622 BP | GO:1902622 regulation of      | 11/1414 | 47/18903  | 0.000557940 | 0.0035451 | 0.00227181 | CD99/SELENOK/TNFAIP6/CD | 11 0. | 234042553191489 |
| GO:1990000 BP | GO:1990000 amyloid            | 10/1414 | 40/18903  | 0.000564558 | 0.0035832 | 0.00229622 | FUS/CRYAB/GSN/APOE/TREM | 10    | 0.25            |
| GO:0031102 BP | GO:0031102 neuron             | 13/1414 | 62/18903  | 0.000568145 | 0.0035832 | 0.00229622 | MMP2/TNC/JUN/THY1/PRRX1 | 13 0. | 209677419354839 |
| GO:0060393 BP | GO:0060393 regulation of      | 13/1414 | 62/18903  | 0.000568145 | 0.0035832 | 0.00229622 | DAB2/GDF10/BMP2/SDCBP/I | 13 0. | 209677419354839 |
| GO:0090303 BP | GO:0090303 positive           | 13/1414 | 62/18903  | 0.000568145 | 0.0035832 | 0.00229622 | ACTG1/SMOC2/XBP1/ANXA1/ | 13 0. | 209677419354839 |
| GO:0035967 BP | GO:0035967 cellular           | 20/1414 | 120/18903 | 0.000568195 | 0.0035832 | 0.00229622 | HSPA1A/HSPA1B/HSPA8/DDI | 20 0. | 166666666666667 |
| GO:0051897 BP | GO:0051897 positive           | 20/1414 | 120/18903 | 0.000568195 | 0.0035832 | 0.00229622 | CHI3L1/H19/FGFR1/FGF2/T | 20 0. | 166666666666667 |

|               |                                     |         |           |             |           |            |                                                          |    |                   |
|---------------|-------------------------------------|---------|-----------|-------------|-----------|------------|----------------------------------------------------------|----|-------------------|
| GO:0048638 BP | GO:0048638 regulation of            | 42/1414 | 332/18903 | 0.000568236 | 0.0035832 | 0.00229622 | FOXP1/SEMA3C/SIX1/RBPJ/                                  | 42 | 0.126506024096386 |
| GO:0050770 BP | GO:0050770 regulation of            | 24/1414 | 156/18903 | 0.000570848 | 0.0035958 | 0.00230428 | THY1/SEMA3C/NTN1/SPP1/F                                  | 24 | 0.153846153846154 |
| GO:0051592 BP | GO:0051592 response to              | 23/1414 | 147/18903 | 0.000578580 | 0.0036406 | 0.00233298 | JUN/FOSB/FOS/ACTG1/PLCG                                  | 23 | 0.156462585034014 |
| GO:0050772 BP | GO:0050772 positive                 | 15/1414 | 78/18903  | 0.000587401 | 0.0036715 | 0.00235279 | NTN1/FN1/TIAM2/VEGFA/DI                                  | 15 | 0.192307692307692 |
| GO:0061045 BP | GO:0061045 negative                 | 15/1414 | 78/18903  | 0.000587401 | 0.0036715 | 0.00235279 | PDGFRA/FAP/SERPINE2/FGF                                  | 15 | 0.192307692307692 |
| GO:0090049 BP | GO:0090049 regulation of            | 15/1414 | 78/18903  | 0.000587401 | 0.0036715 | 0.00235279 | FGF2/PTGS2/ANXA1/VEGFA/                                  | 15 | 0.192307692307692 |
| GO:0034143 BP | GO:0034143 regulation of            | 8/1414  | 27/18903  | 0.000588563 | 0.0036715 | 0.00235279 | NR1D1/PELI1/CD14/LYN/TR                                  | 8  | 0.296296296296296 |
| GO:0036296 BP | GO:0036296 response to              | 8/1414  | 27/18903  | 0.000588563 | 0.0036715 | 0.00235279 | COL1A1/MMP2/PDGFRB/FOXO                                  | 8  | 0.296296296296296 |
| GO:0071549 BP | GO:0071549 cellular                 | 8/1414  | 27/18903  | 0.000588563 | 0.0036715 | 0.00235279 | AQP1/CFLAR/EIF4E/DDIT4/                                  | 8  | 0.296296296296296 |
| GO:2000737 BP | GO:2000737 negative                 | 8/1414  | 27/18903  | 0.000588563 | 0.0036715 | 0.00235279 | LBH/HES1/ZFP36/HSPA9/ZF                                  | 8  | 0.296296296296296 |
| GO:0007042 BP | GO:0007042 lysosomal                | 7/1414  | 21/18903  | 0.000589383 | 0.0036715 | 0.00235279 | ATP6VOC/ATP6VOB/GRN/PPT                                  | 7  | 0.333333333333333 |
| GO:1902307 BP | GO:1902307 positive                 | 7/1414  | 21/18903  | 0.000589383 | 0.0036715 | 0.00235279 | ANK3/FXYD1/GLRX/ATP1B3/                                  | 7  | 0.333333333333333 |
| GO:0032677 BP | GO:0032677 regulation of            | 18/1414 | 103/18903 | 0.000589787 | 0.0036715 | 0.00235279 | CHI3L1/HSPA1A/HSPA1B/DD                                  | 18 | 0.174757281553398 |
| GO:0090596 BP | GO:0090596 sensory organ            | 36/1414 | 272/18903 | 0.000594844 | 0.0036990 | 0.00237043 | MAFB/COL5A1/COL5A2/THY1                                  | 36 | 0.132352941176471 |
| GO:0006457 BP | GO:0006457 protein                  | 31/1414 | 223/18903 | 0.000607306 | 0.0037725 | 0.00241751 | WIPF1/LTBP4/PPIC/PRDX4/                                  | 31 | 0.139013452914798 |
| GO:0010976 BP | GO:0010976 positive                 | 24/1414 | 157/18903 | 0.000627089 | 0.0038912 | 0.00249361 | FLNA/DPYSL3/PTN/TUBB2B/                                  | 24 | 0.152866242038217 |
| GO:0070169 BP | GO:0070169 positive                 | 12/1414 | 55/18903  | 0.000628262 | 0.0038944 | 0.00249562 | PTN/FAM20C/BMP2/TGFB1/B                                  | 12 | 0.218181818181818 |
| GO:0032874 BP | GO:0032874 positive                 | 21/1414 | 130/18903 | 0.000642090 | 0.0039759 | 0.00254784 | GADD45B/GADD45G/TRPV4/I                                  | 21 | 0.161538461538462 |
| GO:0072175 BP | GO:0072175 epithelial               | 22/1414 | 139/18903 | 0.000642942 | 0.0039769 | 0.00254851 | TWIST1/SOX4/SIX1/CTHRC1                                  | 22 | 0.158273381294964 |
| GO:0140694 BP | GO:0140694 non-membrane-<br>bounded | 47/1414 | 386/18903 | 0.000649066 | 0.0040105 | 0.00257006 | PDGFRA/PDGFRB/MYL9/TUBB<br>426900174 979535049 565780834 | 47 | 0.121761658031088 |
| GO:0032637 BP | GO:0032637 interleukin-8            | 18/1414 | 104/18903 | 0.000664304 | 0.0040960 | 0.00262484 | CHI3L1/HSPA1A/HSPA1B/DD                                  | 18 | 0.173076923076923 |
| GO:0042100 BP | GO:0042100 B cell                   | 18/1414 | 104/18903 | 0.000664304 | 0.0040960 | 0.00262484 | CDKN1A/PELI1/HSPD1/CD74                                  | 18 | 0.173076923076923 |
| GO:0043087 BP | GO:0043087 regulation of<br>GTPase  | 46/1414 | 376/18903 | 0.000665556 | 0.0040994 | 0.00262701 | THY1/CCPG1/ASAP2/RGS16/<br>170554704 605521072 046144584 | 46 | 0.122340425531915 |
| GO:0032757 BP | GO:0032757 positive                 | 13/1414 | 63/18903  | 0.000667590 | 0.0041033 | 0.00262948 | CHI3L1/HSPA1A/HSPA1B/DD                                  | 13 | 0.206349206349206 |
| GO:0045453 BP | GO:0045453 bone                     | 13/1414 | 63/18903  | 0.000667590 | 0.0041033 | 0.00262948 | CTSK/LTBP3/TF/SPP1/TNFR                                  | 13 | 0.206349206349206 |
| GO:0060563 BP | GO:0060563 neuroepitheli            | 9/1414  | 34/18903  | 0.000675453 | 0.0041232 | 0.00264226 | SOX4/TUBB/HES1/FAM20C/B                                  | 9  | 0.264705882352941 |
| GO:0001974 BP | GO:0001974 blood vessel             | 11/1414 | 48/18903  | 0.000675536 | 0.0041232 | 0.00264226 | SEMA3C/RBPJ/FLNA/TGFB1/                                  | 11 | 0.229166666666667 |
| GO:0006953 BP | GO:0006953 acute-phase              | 11/1414 | 48/18903  | 0.000675536 | 0.0041232 | 0.00264226 | SAA1/FN1/A2M/SERPINA1/S                                  | 11 | 0.229166666666667 |
| GO:0010171 BP | GO:0010171 body                     | 11/1414 | 48/18903  | 0.000675536 | 0.0041232 | 0.00264226 | COL1A1/MMP2/PDGFRB/CDON                                  | 11 | 0.229166666666667 |
| GO:1904738 BP | GO:1904738 vascular                 | 11/1414 | 48/18903  | 0.000675536 | 0.0041232 | 0.00264226 | TPM1/DDIT3/DOCK4/MEF2C/                                  | 11 | 0.229166666666667 |
| GO:0043299 BP | GO:0043299 leukocyte                | 15/1414 | 79/18903  | 0.000675782 | 0.0041232 | 0.00264226 | S100A13/RABGEF1/VAMP8/I                                  | 15 | 0.189873417721519 |
| GO:2000514 BP | GO:2000514 regulation of            | 15/1414 | 79/18903  | 0.000675782 | 0.0041232 | 0.00264226 | RUNX1/JUNB/CD55/ANXA1/N                                  | 15 | 0.189873417721519 |
| GO:0061077 BP | GO:0061077 chaperone-               | 14/1414 | 71/18903  | 0.000681474 | 0.0041536 | 0.00266173 | DNAJB1/HSPA1A/HSPA1B/HS                                  | 14 | 0.197183098591549 |
| GO:1905954 BP | GO:1905954 positive                 | 19/1414 | 113/18903 | 0.000690467 | 0.0042040 | 0.00269404 | DAB2/ABCA5/MAP2K6/NFKBI                                  | 19 | 0.168141592920354 |

|               |                                      |         |           |             |           |            |                                                    |    |                   |
|---------------|--------------------------------------|---------|-----------|-------------|-----------|------------|----------------------------------------------------|----|-------------------|
| GO:0016064 BP | GO:0016064 immunoglobuli             | 30/1414 | 215/18903 | 0.000692846 | 0.0042097 | 0.00269769 | C1R/C1S/CD55/TGFB1/HSPD                            | 30 | 0.13953488372093  |
| GO:0050803 BP | GO:0050803 regulation of             | 30/1414 | 215/18903 | 0.000692846 | 0.0042097 | 0.00269769 | THBS2/TUBB/TUBA1A/PTPRD                            | 30 | 0.13953488372093  |
| GO:0030513 BP | GO:0030513 positive                  | 10/1414 | 41/18903  | 0.000697223 | 0.0042319 | 0.00271191 | RBPJ/NOTCH2/HES1/CCN1/N                            | 10 | 0.24390243902439  |
| GO:0048675 BP | GO:0048675 axon                      | 20/1414 | 122/18903 | 0.000705834 | 0.0042797 | 0.00274255 | SEMA3C/NTN1/NRP2/FN1/VE                            | 20 | 0.163934426229508 |
| GO:0061097 BP | GO:0061097 regulation of             | 17/1414 | 96/18903  | 0.000708641 | 0.0042923 | 0.00275059 | THY1/SH3BP5/GPRC5A/CAV1                            | 17 | 0.177083333333333 |
| GO:0030214 BP | GO:0030214 hyaluronan                | 6/1414  | 16/18903  | 0.000721192 | 0.0043412 | 0.00278198 | FGF2/TGFB1/CD44/HEXB/HY                            | 6  | 0.375             |
| GO:0046184 BP | GO:0046184 aldehyde                  | 6/1414  | 16/18903  | 0.000721192 | 0.0043412 | 0.00278198 | DKK3/DAB2/BMP2/BMP6/TKT                            | 6  | 0.375             |
| GO:0048268 BP | GO:0048268 clathrin coat             | 6/1414  | 16/18903  | 0.000721192 | 0.0043412 | 0.00278198 | DAB2/FCH02/PICALM/EPS15                            | 6  | 0.375             |
| GO:0060841 BP | GO:0060841 venous blood              | 6/1414  | 16/18903  | 0.000721192 | 0.0043412 | 0.00278198 | SEMA3C/VEGFA/EFNB2/HEG1                            | 6  | 0.375             |
| GO:0070431 BP | GO:0070431 nucleotide-               | 6/1414  | 16/18903  | 0.000721192 | 0.0043412 | 0.00278198 | HSPA1A/HSPA1B/NFKBIA/TL                            | 6  | 0.375             |
| GO:2001212 BP | GO:2001212 regulation of             | 6/1414  | 16/18903  | 0.000721192 | 0.0043412 | 0.00278198 | RIN2/ADM/RAP1A/RAMP2/CD                            | 6  | 0.375             |
| GO:0002604 BP | GO:0002604 regulation of             | 5/1414  | 11/18903  | 0.000732914 | 0.0043757 | 0.00280404 | CD74/CD68/FGL2/FCGR2B/T                            | 5  | 0.454545454545455 |
| GO:0032060 BP | GO:0032060 bleb assembly             | 5/1414  | 11/18903  | 0.000732914 | 0.0043757 | 0.00280404 | PMP22/LPAR1/EMP3/EMP1/R                            | 5  | 0.454545454545455 |
| GO:0033212 BP | GO:0033212 iron import               | 5/1414  | 11/18903  | 0.000732914 | 0.0043757 | 0.00280404 | SLC39A14/STEAP4/STEAP2/                            | 5  | 0.454545454545455 |
| GO:0042989 BP | GO:0042989 sequestering              | 5/1414  | 11/18903  | 0.000732914 | 0.0043757 | 0.00280404 | SCIN/GSN/TMSB4X/TMSB10/                            | 5  | 0.454545454545455 |
| GO:0061418 BP | GO:0061418 regulation of             | 5/1414  | 11/18903  | 0.000732914 | 0.0043757 | 0.00280404 | EGR1/RBPJ/VEGFA/CITED2/                            | 5  | 0.454545454545455 |
| GO:0071803 BP | GO:0071803 positive                  | 5/1414  | 11/18903  | 0.000732914 | 0.0043757 | 0.00280404 | LCP1/RHOA/MSN/ASAP1/FSC                            | 5  | 0.454545454545455 |
| GO:0098883 BP | GO:0098883 synapse                   | 5/1414  | 11/18903  | 0.000732914 | 0.0043757 | 0.00280404 | C1QC/C1QA/C1QB/ITGAM/TR                            | 5  | 0.454545454545455 |
| GO:1990440 BP | GO:1990440 positive                  | 5/1414  | 11/18903  | 0.000732914 | 0.0043757 | 0.00280404 | DDIT3/CEBPB/ATF4/HSPA5/                            | 5  | 0.454545454545455 |
| GO:0002707 BP | GO:0002707 negative                  | 12/1414 | 56/18903  | 0.000745978 | 0.0044364 | 0.00284296 | CD55/PTPRC/ARRB2/AHR/FC                            | 12 | 0.214285714285714 |
| GO:0110151 BP | GO:0110151 positive                  | 12/1414 | 56/18903  | 0.000745978 | 0.0044364 | 0.00284296 | PTN/FAM20C/BMP2/TGFB1/B                            | 12 | 0.214285714285714 |
| GO:2000630 BP | GO:2000630 positive                  | 12/1414 | 56/18903  | 0.000745978 | 0.0044364 | 0.00284296 | JUN/EGR1/FOS/KCNQ1OT1/E                            | 12 | 0.214285714285714 |
| GO:0032370 BP | GO:0032370 positive                  | 16/1414 | 88/18903  | 0.000746888 | 0.0044364 | 0.00284296 | DAB2/ABCA5/MAP2K6/NFKBI                            | 16 | 0.181818181818182 |
| GO:0043367 BP | GO:0043367 CD4-positive,             | 16/1414 | 88/18903  | 0.000746888 | 0.0044364 | 0.00284296 | FOXP1/RUNX1/JUNB/ANXA1/                            | 16 | 0.181818181818182 |
| GO:0010758 BP | GO:0010758 regulation of             | 8/1414  | 28/18903  | 0.000770455 | 0.0045532 | 0.00291781 | TRPV4/CSF1R/C3AR1/C5AR1                            | 8  | 0.285714285714286 |
| GO:0010818 BP | GO:0010818 T cell                    | 8/1414  | 28/18903  | 0.000770455 | 0.0045532 | 0.00291781 | CCL3/GPR183/CXCL16/ADAM                            | 8  | 0.285714285714286 |
| GO:0031342 BP | GO:0031342 negative                  | 8/1414  | 28/18903  | 0.000770455 | 0.0045532 | 0.00291781 | PTPRC/ARRB2/FCGR2B/NCKA                            | 8  | 0.285714285714286 |
| GO:0044331 BP | GO:0044331 cell-cell                 | 8/1414  | 28/18903  | 0.000770455 | 0.0045532 | 0.00291781 | BMP6/RGCC/VEGFA/AFDN/TJ                            | 8  | 0.285714285714286 |
| GO:1903672 BP | GO:1903672 positive                  | 8/1414  | 28/18903  | 0.000770455 | 0.0045532 | 0.00291781 | S100A1/FGF2/FGF1/VEGFA/                            | 8  | 0.285714285714286 |
| GO:0048644 BP | GO:0048644 muscle organ              | 15/1414 | 80/18903  | 0.000775216 | 0.0045721 | 0.00292990 | COL3A1/RBPJ/TPM1/COL11A                            | 15 | 0.1875            |
| GO:1903201 BP | GO:1903201 regulation of             | 15/1414 | 80/18903  | 0.000775216 | 0.0045721 | 0.00292990 | FOXP1/STK26/MMP3/SOD2/T                            | 15 | 0.1875            |
| GO:0050918 BP | GO:0050918 positive                  | 13/1414 | 64/18903  | 0.000781298 | 0.0046033 | 0.00294991 | GPNMB/FGF2/VEGFA/CCL3/C                            | 13 | 0.203125          |
| GO:0046328 BP | GO:0046328 regulation of             | 22/1414 | 141/18903 | 0.000783154 | 0.0046096 | 0.00295393 | GADD45B/GADD45G/DNAJA1/                            | 22 | 0.156028368794326 |
| GO:0034284 BP | GO:0034284 response to               | 29/1414 | 207/18903 | 0.000790133 | 0.0046460 | 0.00297725 | EGR1/SOX4/COL6A2/SLC29A                            | 29 | 0.140096618357488 |
| GO:0009410 BP | GO:0009410 response to<br>xenobiotic | 51/1414 | 432/18903 | 0.000798302 | 0.0046893 | 0.00300500 | COL1A1/MMP2/JUN/FOSB/FO<br>S/SEMA3C/TIMP4/MAP2K6/S | 51 | 0.118055555555556 |

|               |                                    |         |           |             |           |            |                                                    |    |                   |
|---------------|------------------------------------|---------|-----------|-------------|-----------|------------|----------------------------------------------------|----|-------------------|
| GO:0002902 BP | GO:0002902 regulation of           | 7/1414  | 22/18903  | 0.000809016 | 0.0047331 | 0.00303311 | FOXP1/ORMDL3/CD74/LYN/B                            | 7  | 0.318181818181818 |
| GO:0006907 BP | GO:0006907 pinocytosis             | 7/1414  | 22/18903  | 0.000809016 | 0.0047331 | 0.00303311 | CAV1/MAPKAPK2/PYCARD/DO                            | 7  | 0.318181818181818 |
| GO:0010042 BP | GO:0010042 response to             | 7/1414  | 22/18903  | 0.000809016 | 0.0047331 | 0.00303311 | FIBIN/SOD2/PTGS2/ATF4/H                            | 7  | 0.318181818181818 |
| GO:0030449 BP | GO:0030449 regulation of           | 7/1414  | 22/18903  | 0.000809016 | 0.0047331 | 0.00303311 | CFH/A2M/CD55/CD59/VSIG4                            | 7  | 0.318181818181818 |
| GO:0010862 BP | GO:0010862 positive                | 11/1414 | 49/18903  | 0.000813026 | 0.0047518 | 0.00304509 | DAB2/GDF10/BMP2/SDCBP/I                            | 11 | 0.224489795918367 |
| GO:0002709 BP | GO:0002709 regulation of           | 16/1414 | 89/18903  | 0.000848525 | 0.0049544 | 0.00317487 | CD55/HSPD1/HLA-                                    | 16 | 0.179775280898876 |
| GO:0001893 BP | GO:0001893 maternal                | 9/1414  | 35/18903  | 0.000849596 | 0.0049556 | 0.00317570 | PTN/JUNB/STC2/SPP1/PTGS                            | 9  | 0.257142857142857 |
| GO:0010463 BP | GO:0010463 mesenchymal             | 10/1414 | 42/18903  | 0.000854547 | 0.0049746 | 0.00318783 | LMNA/SIX1/PRRX1/ZEB1/BM                            | 10 | 0.238095238095238 |
| GO:0045429 BP | GO:0045429 positive                | 10/1414 | 42/18903  | 0.000854547 | 0.0049746 | 0.00318783 | SOD2/PTGS2/HSP90AA1/KLF                            | 10 | 0.238095238095238 |
| GO:0035710 BP | GO:0035710 CD4-positive,           | 19/1414 | 115/18903 | 0.000860814 | 0.0050011 | 0.00320481 | FOXP1/RUNX1/JUNB/CD55/A                            | 19 | 0.165217391304348 |
| GO:1990748 BP | GO:1990748 cellular                | 19/1414 | 115/18903 | 0.000860814 | 0.0050011 | 0.00320481 | GPX8/H19/PRDX4/GPX3/SOD                            | 19 | 0.165217391304348 |
| GO:0019724 BP | GO:0019724 B cell                  | 30/1414 | 218/18903 | 0.000871256 | 0.0050517 | 0.00323724 | C1R/C1S/CD55/TGFB1/HSPD                            | 30 | 0.137614678899083 |
| GO:0044706 BP | GO:0044706 multi-                  | 30/1414 | 218/18903 | 0.000871256 | 0.0050517 | 0.00323724 | MMP2/GJA1/FOSB/FOS/VMP1                            | 30 | 0.137614678899083 |
| GO:0007565 BP | GO:0007565 female                  | 27/1414 | 189/18903 | 0.000873268 | 0.0050583 | 0.00324149 | MMP2/GJA1/FOSB/FOS/VMP1                            | 27 | 0.142857142857143 |
| GO:0045137 BP | GO:0045137 development             | 32/1414 | 238/18903 | 0.000892184 | 0.0051628 | 0.00330842 | MMP2/PDGFRB/PDGFRB/COL9                            | 32 | 0.134453781512605 |
| GO:1902414 BP | GO:1902414 protein                 | 17/1414 | 98/18903  | 0.000902282 | 0.0052160 | 0.00334255 | ACTG1/ACTB/GPC6/HSPB1/L                            | 17 | 0.173469387755102 |
| GO:0071260 BP | GO:0071260 cellular                | 14/1414 | 73/18903  | 0.000909837 | 0.0052545 | 0.00336720 | COL1A1/AQP1/PIEZO1/FGF2                            | 14 | 0.191780821917808 |
| GO:0055074 BP | GO:0055074 calcium ion             | 39/1414 | 309/18903 | 0.000916935 | 0.0052902 | 0.00339011 | THY1/FLNA/NT5E/PLCG2/DD                            | 39 | 0.12621359223301  |
| GO:0044703 BP | GO:0044703 multi-                  | 29/1414 | 209/18903 | 0.000922495 | 0.0053118 | 0.00340394 | MMP2/GJA1/FOSB/FOS/VMP1                            | 29 | 0.138755980861244 |
| GO:0050807 BP | GO:0050807 regulation of           | 29/1414 | 209/18903 | 0.000922495 | 0.0053118 | 0.00340394 | THBS2/TUBB/TUBA1A/PTPRD                            | 29 | 0.138755980861244 |
| GO:0071322 BP | GO:0071322 cellular                | 23/1414 | 152/18903 | 0.000928921 | 0.0053435 | 0.00342426 | ZFP36L1/SOX4/MAP2K6/SLC                            | 23 | 0.151315789473684 |
| GO:0006959 BP | GO:0006959 humoral                 | 40/1414 | 320/18903 | 0.000958270 | 0.0055041 | 0.00352715 | C1R/RBPJ/NOTCH2/RPL39/T                            | 40 | 0.125             |
| GO:0072009 BP | GO:0072009 nephron                 | 19/1414 | 116/18903 | 0.000958719 | 0.0055041 | 0.00352715 | AQP1/SIX1/NOTCH2/GLI3/H                            | 19 | 0.163793103448276 |
| GO:0006029 BP | GO:0006029 proteoglycan            | 16/1414 | 90/18903  | 0.000961681 | 0.0055066 | 0.00352878 | DSEL/SULF2/DSE/COL2A1/C                            | 16 | 0.177777777777778 |
| GO:0010586 BP | GO:0010586 miRNA                   | 16/1414 | 90/18903  | 0.000961681 | 0.0055066 | 0.00352878 | JUN/EGR1/FOS/KCNQ10T1/E                            | 16 | 0.177777777777778 |
| GO:0006022 BP | GO:0006022 aminoglycan             | 21/1414 | 134/18903 | 0.000961994 | 0.0055066 | 0.00352878 | PDGFRB/DSEL/CHI3L1/DSE/                            | 21 | 0.156716417910448 |
| GO:0043280 BP | GO:0043280 positive                | 20/1414 | 125/18903 | 0.000965888 | 0.0055235 | 0.00353959 | GSN/CFLAR/CYCS/RPS3/HSP                            | 20 | 0.16              |
| GO:0038084 BP | GO:0038084 vascular                | 11/1414 | 50/18903  | 0.000972914 | 0.0055474 | 0.00355489 | PDGFRB/PDGFRB/SMOC2/NRP                            | 11 | 0.22              |
| GO:0061082 BP | GO:0061082 myeloid                 | 11/1414 | 50/18903  | 0.000972914 | 0.0055474 | 0.00355489 | TWIST1/PLCG2/TGFB1/RABG                            | 11 | 0.22              |
| GO:1904707 BP | GO:1904707 positive                | 11/1414 | 50/18903  | 0.000972914 | 0.0055474 | 0.00355489 | MMP2/GJA1/JUN/FGF2/GNAI                            | 11 | 0.22              |
| GO:0010575 BP | GO:0010575 positive                | 8/1414  | 29/18903  | 0.000994914 | 0.0056507 | 0.00362111 | SULF2/TGFB1/PTGS2/ATF4/                            | 8  | 0.275862068965517 |
| GO:0010955 BP | GO:0010955 negative                | 8/1414  | 29/18903  | 0.000994914 | 0.0056507 | 0.00362111 | GAS1/SERPINE2/NOL3/CTSZ                            | 8  | 0.275862068965517 |
| GO:0034123 BP | GO:0034123 positive                | 8/1414  | 29/18903  | 0.000994914 | 0.0056507 | 0.00362111 | PELI1/CAV1/CD14/CYBA/RT                            | 8  | 0.275862068965517 |
| GO:1903318 BP | GO:1903318 negative                | 8/1414  | 29/18903  | 0.000994914 | 0.0056507 | 0.00362111 | GAS1/SERPINE2/NOL3/CTSZ                            | 8  | 0.275862068965517 |
| GO:1904062 BP | GO:1904062 regulation of<br>cation | 47/1414 | 394/18903 | 0.001008229 | 0.0057208 | 0.00366600 | THY1/TWIST1/FLNA/VMP1/F<br>HL1/ANK3/NDUFA4/PLCG2/G | 47 | 0.119289340101523 |

|               |                          |         |           |             |           |            |                         |    |                   |
|---------------|--------------------------|---------|-----------|-------------|-----------|------------|-------------------------|----|-------------------|
| GO:0046209 BP | GO:0046209 nitric oxide  | 15/1414 | 82/18903  | 0.001011638 | 0.0057345 | 0.00367482 | SOD2/PTGS2/CAV1/HSP90AA | 15 | 0.182926829268293 |
| GO:0032755 BP | GO:0032755 positive      | 17/1414 | 99/18903  | 0.001014914 | 0.0057475 | 0.00368314 | TWIST1/PLCG2/TRPV4/SELE | 17 | 0.171717171717172 |
| GO:0061005 BP | GO:0061005 cell          | 12/1414 | 58/18903  | 0.001037090 | 0.0058465 | 0.00374660 | NOTCH2/GLI3/HES1/MAGI2/ | 12 | 0.206896551724138 |
| GO:0021879 BP | GO:0021879 forebrain     | 10/1414 | 43/18903  | 0.001039873 | 0.0058465 | 0.00374660 | HES1/UBB/NRP2/INHBA/FGF | 10 | 0.232558139534884 |
| GO:0033574 BP | GO:0033574 response to   | 10/1414 | 43/18903  | 0.001039873 | 0.0058465 | 0.00374660 | FOXP1/SPP1/CFLAR/CA9/NC | 10 | 0.232558139534884 |
| GO:0060412 BP | GO:0060412 ventricular   | 10/1414 | 43/18903  | 0.001039873 | 0.0058465 | 0.00374660 | SOX4/RBPJ/HES1/FGFRL1/F | 10 | 0.232558139534884 |
| GO:0071364 BP | GO:0071364 cellular      | 10/1414 | 43/18903  | 0.001039873 | 0.0058465 | 0.00374660 | COL1A1/ZFP36L1/FOS/DAB2 | 10 | 0.232558139534884 |
| GO:0071548 BP | GO:0071548 response to   | 10/1414 | 43/18903  | 0.001039873 | 0.0058465 | 0.00374660 | AQP1/FIBIN/CFLAR/EIF4E/ | 10 | 0.232558139534884 |
| GO:0002921 BP | GO:0002921 negative      | 6/1414  | 17/18903  | 0.001044427 | 0.0058465 | 0.00374660 | A2M/CD55/CD59/VSIG4/FCG | 6  | 0.352941176470588 |
| GO:0010566 BP | GO:0010566 regulation of | 6/1414  | 17/18903  | 0.001044427 | 0.0058465 | 0.00374660 | EGR1/DKK3/DAB2/BMP2/BMP | 6  | 0.352941176470588 |
| GO:0010763 BP | GO:0010763 positive      | 6/1414  | 17/18903  | 0.001044427 | 0.0058465 | 0.00374660 | AQP1/TGFB1/SLC8A1/THBS1 | 6  | 0.352941176470588 |
| GO:0072224 BP | GO:0072224 metanephric   | 6/1414  | 17/18903  | 0.001044427 | 0.0058465 | 0.00374660 | EGR1/PDGFRB/AQP1/PDGFRB | 6  | 0.352941176470588 |
| GO:1901550 BP | GO:1901550 regulation of | 6/1414  | 17/18903  | 0.001044427 | 0.0058465 | 0.00374660 | VEGFA/ROCK1/VCL/CDH5/CL | 6  | 0.352941176470588 |
| GO:1903140 BP | GO:1903140 regulation of | 6/1414  | 17/18903  | 0.001044427 | 0.0058465 | 0.00374660 | VEGFA/ROCK1/VCL/CDH5/CL | 6  | 0.352941176470588 |
| GO:0050766 BP | GO:0050766 positive      | 14/1414 | 74/18903  | 0.001046255 | 0.0058512 | 0.00374956 | PLCG2/FCER1G/PTPRC/CLEC | 14 | 0.189189189189189 |
| GO:0090263 BP | GO:0090263 positive      | 18/1414 | 108/18903 | 0.001048810 | 0.0058598 | 0.00375511 | COL1A1/SOX4/ZEB2/RSP02/ | 18 | 0.166666666666667 |
| GO:0050854 BP | GO:0050854 regulation of | 13/1414 | 66/18903  | 0.001057896 | 0.0058916 | 0.00377544 | THY1/FOXP1/RPS3/LAPTM5/ | 13 | 0.196969696969697 |
| GO:0006026 BP | GO:0006026 aminoglycan   | 9/1414  | 36/18903  | 0.001058529 | 0.0058916 | 0.00377544 | CHI3L1/CHI3L2/FGF2/TGFB | 9  | 0.25              |
| GO:0035909 BP | GO:0035909 aorta         | 9/1414  | 36/18903  | 0.001058529 | 0.0058916 | 0.00377544 | COL3A1/PDGFRB/SOX4/SIX1 | 9  | 0.25              |
| GO:0071711 BP | GO:0071711 basement      | 9/1414  | 36/18903  | 0.001058529 | 0.0058916 | 0.00377544 | COL3A1/SPINT2/CAV1/CTSS | 9  | 0.25              |
| GO:0071887 BP | GO:0071887 leukocyte     | 19/1414 | 117/18903 | 0.001066001 | 0.0059275 | 0.00379847 | FOXP1/GLI3/ANXA1/CTSL/P | 19 | 0.162393162393162 |
| GO:0002822 BP | GO:0002822 regulation of | 26/1414 | 182/18903 | 0.001077443 | 0.0059854 | 0.00383559 | JUNB/CD55/TGFB1/ANXA1/H | 26 | 0.142857142857143 |
| GO:0030901 BP | GO:0030901 midbrain      | 16/1414 | 91/18903  | 0.001087378 | 0.0060348 | 0.00386727 | ACTB/S100A1/HES1/NDRG2/ | 16 | 0.175824175824176 |
| GO:0048143 BP | GO:0048143 astrocyte     | 7/1414  | 23/18903  | 0.001088506 | 0.0060354 | 0.00386760 | NR1D1/C1QA/C5AR1/TREM2/ | 7  | 0.304347826086957 |
| GO:0002429 BP | GO:0002429 immune        | 39/1414 | 312/18903 | 0.001101439 | 0.0060955 | 0.00390613 | THY1/FOXP1/PLCG2/PDE4B/ | 39 | 0.125             |
| GO:0002757 BP | GO:0002757 immune        | 39/1414 | 312/18903 | 0.001101439 | 0.0060955 | 0.00390613 | THY1/FOXP1/PLCG2/PDE4B/ | 39 | 0.125             |
| GO:0050848 BP | GO:0050848 regulation of | 15/1414 | 83/18903  | 0.001151006 | 0.0063577 | 0.00407418 | RCAN1/PLCG2/SELENOK/CAM | 15 | 0.180722891566265 |
| GO:2001057 BP | GO:2001057 reactive      | 15/1414 | 83/18903  | 0.001151006 | 0.0063577 | 0.00407418 | SOD2/PTGS2/CAV1/HSP90AA | 15 | 0.180722891566265 |
| GO:0045165 BP | GO:0045165 cell fate     | 36/1414 | 282/18903 | 0.001153226 | 0.0063640 | 0.00407818 | SIX1/RBPJ/PRRX1/NOTCH2/ | 36 | 0.127659574468085 |
| GO:0002887 BP | GO:0002887 negative      | 5/1414  | 12/18903  | 0.001179256 | 0.0064648 | 0.00414279 | RABGEF1/SPI1/CD84/FCGR2 | 5  | 0.416666666666667 |
| GO:0003157 BP | GO:0003157 endocardium   | 5/1414  | 12/18903  | 0.001179256 | 0.0064648 | 0.00414279 | RBPJ/STK4/SOX18/KDR/SOX | 5  | 0.416666666666667 |
| GO:0021979 BP | GO:0021979 hypothalamus  | 5/1414  | 12/18903  | 0.001179256 | 0.0064648 | 0.00414279 | UBB/NRP2/NDNF/NRP1/SEMA | 5  | 0.416666666666667 |
| GO:0045602 BP | GO:0045602 negative      | 5/1414  | 12/18903  | 0.001179256 | 0.0064648 | 0.00414279 | ZEB1/VEGFA/JAG1/NOTCH4/ | 5  | 0.416666666666667 |
| GO:0061309 BP | GO:0061309 cardiac       | 5/1414  | 12/18903  | 0.001179256 | 0.0064648 | 0.00414279 | TWIST1/SEMA3C/HES1/CDC4 | 5  | 0.416666666666667 |
| GO:0061795 BP | GO:0061795 Golgi lumen   | 5/1414  | 12/18903  | 0.001179256 | 0.0064648 | 0.00414279 | ATP6V0C/ATP6V0B/ATP6V1F | 5  | 0.416666666666667 |
| GO:1904667 BP | GO:1904667 negative      | 5/1414  | 12/18903  | 0.001179256 | 0.0064648 | 0.00414279 | RPS20/RPS15/RPS7/RPL11/ | 5  | 0.416666666666667 |

|               |                                     |         |           |             |           |            |                                                         |    |                   |
|---------------|-------------------------------------|---------|-----------|-------------|-----------|------------|---------------------------------------------------------|----|-------------------|
| GO:0009205 BP | GO:0009205 purine                   | 32/1414 | 242/18903 | 0.001181803 | 0.0064727 | 0.00414784 | NT5E/H19/NDUFB1/ATP5ME/                                 | 32 | 0.132231404958678 |
| GO:0002718 BP | GO:0002718 regulation of            | 19/1414 | 118/18903 | 0.001183375 | 0.0064752 | 0.00414946 | TWIST1/PLCG2/CD55/TGFB1                                 | 19 | 0.161016949152542 |
| GO:0006816 BP | GO:0006816 calcium ion<br>transport | 51/1414 | 440/18903 | 0.001200222 | 0.0065612 | 0.00420459 | THY1/PDGFRB/FLNA/VMP1/P<br>48505659 912421134 729140823 | 51 | 0.115909090909091 |
| GO:0046578 BP | GO:0046578 regulation of            | 27/1414 | 193/18903 | 0.001201929 | 0.0065644 | 0.00420663 | COL3A1/PDGFRB/NOTCH2/SQ                                 | 27 | 0.139896373056995 |
| GO:0001656 BP | GO:0001656 metanephros              | 16/1414 | 92/18903  | 0.001226699 | 0.0066809 | 0.00428130 | EGR1/PDGFRB/AQP1/PDGFRB                                 | 16 | 0.173913043478261 |
| GO:0009791 BP | GO:0009791 post-                    | 16/1414 | 92/18903  | 0.001226699 | 0.0066809 | 0.00428130 | SEMA3C/FBN1/EFEMP1/SCUB                                 | 16 | 0.173913043478261 |
| GO:0032273 BP | GO:0032273 positive                 | 16/1414 | 92/18903  | 0.001226699 | 0.0066809 | 0.00428130 | HSPA1A/HSPA1B/RPS3/HSP9                                 | 16 | 0.173913043478261 |
| GO:0042771 BP | GO:0042771 intrinsic                | 10/1414 | 44/18903  | 0.001256808 | 0.0068258 | 0.00437413 | CDKN1A/NUPR1/CD44/DDIT4                                 | 10 | 0.227272727272727 |
| GO:1904407 BP | GO:1904407 positive                 | 10/1414 | 44/18903  | 0.001256808 | 0.0068258 | 0.00437413 | SOD2/PTGS2/HSP90AA1/KLF                                 | 10 | 0.227272727272727 |
| GO:1905521 BP | GO:1905521 regulation of            | 10/1414 | 44/18903  | 0.001256808 | 0.0068258 | 0.00437413 | TRPV4/CSF1R/CCL3/C3AR1/                                 | 10 | 0.227272727272727 |
| GO:0008406 BP | GO:0008406 gonad                    | 31/1414 | 233/18903 | 0.001264771 | 0.0068575 | 0.00439442 | MMP2/PDGFRB/PDGFRB/COL9                                 | 31 | 0.133047210300429 |
| GO:0021700 BP | GO:0021700 developmental            | 38/1414 | 304/18903 | 0.001266165 | 0.0068575 | 0.00439442 | MMP2/RBPJ/HES1/DDIT3/ZB                                 | 38 | 0.125             |
| GO:0051047 BP | GO:0051047 positive                 | 38/1414 | 304/18903 | 0.001266165 | 0.0068575 | 0.00439442 | AQP1/SOX4/DAB2/MAP2K6/R                                 | 38 | 0.125             |
| GO:0048562 BP | GO:0048562 embryonic                | 37/1414 | 294/18903 | 0.001288452 | 0.0069717 | 0.00446762 | MAFB/PDGFRB/TWIST1/SIX1                                 | 37 | 0.125850340136054 |
| GO:0050868 BP | GO:0050868 negative                 | 20/1414 | 128/18903 | 0.001304178 | 0.0070502 | 0.00451796 | GPNUMB/RUNX1/GLI3/LAG3/S                                | 20 | 0.15625           |
| GO:0010092 BP | GO:0010092 specification            | 9/1414  | 37/18903  | 0.001307152 | 0.0070598 | 0.00452407 | SIX1/RBPJ/GLI3/BMP2/FGF                                 | 9  | 0.243243243243243 |
| GO:0032386 BP | GO:0032386 regulation of            | 41/1414 | 336/18903 | 0.001333043 | 0.0071930 | 0.00460941 | DAB2/FLNA/GAS1/GLI3/ANK                                 | 41 | 0.12202380952381  |
| GO:0030516 BP | GO:0030516 regulation of            | 16/1414 | 93/18903  | 0.001380789 | 0.0074437 | 0.00477009 | SEMA3C/NTN1/FN1/VEGFA/A                                 | 16 | 0.172043010752688 |
| GO:0030879 BP | GO:0030879 mammary gland            | 21/1414 | 138/18903 | 0.001410389 | 0.0075959 | 0.00486762 | LBH/CD01/GLI3/NTN1/SLC2                                 | 21 | 0.152173913043478 |
| GO:0002886 BP | GO:0002886 regulation of            | 12/1414 | 60/18903  | 0.001416832 | 0.0075959 | 0.00486762 | RABGEF1/TYROBP/VAMP8/IT                                 | 12 | 0.2               |
| GO:0043407 BP | GO:0043407 negative                 | 12/1414 | 60/18903  | 0.001416832 | 0.0075959 | 0.00486762 | DNAJA1/BMP2/SPRY2/CAV1/                                 | 12 | 0.2               |
| GO:0045599 BP | GO:0045599 negative                 | 12/1414 | 60/18903  | 0.001416832 | 0.0075959 | 0.00486762 | ID4/FOXO1/DDIT3/TRPV4/S                                 | 12 | 0.2               |
| GO:0055008 BP | GO:0055008 cardiac                  | 12/1414 | 60/18903  | 0.001416832 | 0.0075959 | 0.00486762 | RBPJ/TPM1/COL11A1/BMP2/                                 | 12 | 0.2               |
| GO:1903670 BP | GO:1903670 regulation of            | 12/1414 | 60/18903  | 0.001416832 | 0.0075959 | 0.00486762 | S100A1/FGF2/FGF1/VEGFA/                                 | 12 | 0.2               |
| GO:0034504 BP | GO:0034504 protein                  | 38/1414 | 306/18903 | 0.001427715 | 0.0076472 | 0.00490050 | COL1A1/LMNA/SIX1/FLNA/G                                 | 38 | 0.124183006535948 |
| GO:0051928 BP | GO:0051928 positive                 | 20/1414 | 129/18903 | 0.001437366 | 0.0076836 | 0.00492382 | THY1/PDGFRB/VMP1/PLCG2/                                 | 20 | 0.155038759689922 |
| GO:0003181 BP | GO:0003181 atrioventricu            | 7/1414  | 24/18903  | 0.001438461 | 0.0076836 | 0.00492382 | TWIST1/SOX4/BMP2/CCN1/E                                 | 7  | 0.291666666666667 |
| GO:0050855 BP | GO:0050855 regulation of            | 7/1414  | 24/18903  | 0.001438461 | 0.0076836 | 0.00492382 | FOXP1/FCGR2B/LYN/CMTM3/                                 | 7  | 0.291666666666667 |
| GO:0022900 BP | GO:0022900 electron                 | 25/1414 | 176/18903 | 0.001442612 | 0.0076987 | 0.00493351 | P4HA2/NDUFA4/NDUFB1/UQC                                 | 25 | 0.142045454545455 |
| GO:0042177 BP | GO:0042177 negative                 | 18/1414 | 111/18903 | 0.001449263 | 0.0077246 | 0.00495010 | TIMP2/FLNA/TIMP4/SERPIN                                 | 18 | 0.162162162162162 |
| GO:0002367 BP | GO:0002367 cytokine                 | 19/1414 | 120/18903 | 0.001451436 | 0.0077246 | 0.00495010 | TWIST1/PLCG2/CD55/TGFB1                                 | 19 | 0.158333333333333 |
| GO:0002821 BP | GO:0002821 positive                 | 19/1414 | 120/18903 | 0.001451436 | 0.0077246 | 0.00495010 | CD55/TGFB1/AKIRIN2/HSPD                                 | 19 | 0.158333333333333 |
| GO:0003159 BP | GO:0003159 morphogenesis            | 6/1414  | 18/18903  | 0.001468203 | 0.0077502 | 0.00496650 | FOXP1/RBPJ/FGF1/CXCR4/R                                 | 6  | 0.333333333333333 |
| GO:0034138 BP | GO:0034138 toll-like                | 6/1414  | 18/18903  | 0.001468203 | 0.0077502 | 0.00496650 | PELI1/CAV1/UNC93B1/COLE                                 | 6  | 0.333333333333333 |
| GO:0043117 BP | GO:0043117 positive                 | 6/1414  | 18/18903  | 0.001468203 | 0.0077502 | 0.00496650 | TRPV4/TGFB1/BMP6/VEGFA/                                 | 6  | 0.333333333333333 |

|               |                          |         |           |             |           |            |                         |                       |
|---------------|--------------------------|---------|-----------|-------------|-----------|------------|-------------------------|-----------------------|
| GO:0048569 BP | GO:0048569 post-         | 6/1414  | 18/18903  | 0.001468203 | 0.0077502 | 0.00496650 | FBN1/EFEMP1/VEGFA/KLF4/ | 6 0.3333333333333333  |
| GO:0061154 BP | GO:0061154 endothelial   | 6/1414  | 18/18903  | 0.001468203 | 0.0077502 | 0.00496650 | FOXP1/RBPJ/FGF1/CXCR4/R | 6 0.3333333333333333  |
| GO:0086103 BP | GO:0086103 G protein-    | 6/1414  | 18/18903  | 0.001468203 | 0.0077502 | 0.00496650 | PDE4B/CAV1/CDC42/GNAI2/ | 6 0.3333333333333333  |
| GO:0150078 BP | GO:0150078 positive      | 6/1414  | 18/18903  | 0.001468203 | 0.0077502 | 0.00496650 | PLCG2/NUPR1/CCL3/TREM2/ | 6 0.3333333333333333  |
| GO:2000641 BP | GO:2000641 regulation of | 6/1414  | 18/18903  | 0.001468203 | 0.0077502 | 0.00496650 | DAB2/EZR/MSN/RDX/SNX3/C | 6 0.3333333333333333  |
| GO:2000811 BP | GO:2000811 negative      | 6/1414  | 18/18903  | 0.001468203 | 0.0077502 | 0.00496650 | PIK3R3/CAV1/ITGA5/MCL1/ | 6 0.3333333333333333  |
| GO:0034767 BP | GO:0034767 positive      | 26/1414 | 186/18903 | 0.001483270 | 0.0078227 | 0.00501293 | THY1/FLNA/VMP1/ANK3/NDU | 26 0.139784946236559  |
| GO:0030501 BP | GO:0030501 positive      | 10/1414 | 45/18903  | 0.001509222 | 0.0079308 | 0.00508226 | PTN/FAM20C/BMP2/TGFB1/B | 10 0.2222222222222222 |
| GO:0030890 BP | GO:0030890 positive      | 10/1414 | 45/18903  | 0.001509222 | 0.0079308 | 0.00508226 | CDKN1A/PELI1/CD74/PTPRC | 10 0.2222222222222222 |
| GO:1904646 BP | GO:1904646 cellular      | 10/1414 | 45/18903  | 0.001509222 | 0.0079308 | 0.00508226 | GJA1/VCAM1/ICAM1/FCGR2B | 10 0.2222222222222222 |
| GO:2000516 BP | GO:2000516 positive      | 10/1414 | 45/18903  | 0.001509222 | 0.0079308 | 0.00508226 | CD55/ANXA1/NFKBIZ/HLA-  | 10 0.2222222222222222 |
| GO:1903035 BP | GO:1903035 negative      | 16/1414 | 94/18903  | 0.001550857 | 0.0081423 | 0.00521776 | PDGFRA/FAP/SPP1/SERPINE | 16 0.170212765957447  |
| GO:0034121 BP | GO:0034121 regulation of | 14/1414 | 77/18903  | 0.001562503 | 0.0081961 | 0.00525222 | NR1D1/PELI1/BIRC2/CAV1/ | 14 0.181818181818182  |
| GO:0032612 BP | GO:0032612 interleukin-1 | 20/1414 | 130/18903 | 0.001581961 | 0.0082832 | 0.00530808 | EGR1/FOXP1/S100A13/SAA1 | 20 0.153846153846154  |
| GO:0032652 BP | GO:0032652 regulation of | 20/1414 | 130/18903 | 0.001581961 | 0.0082832 | 0.00530808 | EGR1/FOXP1/S100A13/SAA1 | 20 0.153846153846154  |
| GO:0001916 BP | GO:0001916 positive      | 8/1414  | 31/18903  | 0.001599317 | 0.0083441 | 0.00534708 | HLA-DRB1/HLA-           | 8 0.258064516129032   |
| GO:0010039 BP | GO:0010039 response to   | 8/1414  | 31/18903  | 0.001599317 | 0.0083441 | 0.00534708 | SLC40A1/TF/BMP6/MAP1LC3 | 8 0.258064516129032   |
| GO:0060390 BP | GO:0060390 regulation of | 8/1414  | 31/18903  | 0.001599317 | 0.0083441 | 0.00534708 | DAB2/CILP/BMP2/TGFB1/BM | 8 0.258064516129032   |
| GO:0010742 BP | GO:0010742 macrophage    | 9/1414  | 38/18903  | 0.001600737 | 0.0083441 | 0.00534708 | ABCA5/PLA2G2A/NFKBIA/SE | 9 0.236842105263158   |
| GO:0048009 BP | GO:0048009 insulin-like  | 9/1414  | 38/18903  | 0.001600737 | 0.0083441 | 0.00534708 | IGFBP4/CILP/IGFBP6/PIK3 | 9 0.236842105263158   |
| GO:0002700 BP | GO:0002700 regulation of | 26/1414 | 187/18903 | 0.001603213 | 0.0083495 | 0.00535057 | TWIST1/PLCG2/RBP4/XBP1/ | 26 0.13903743315508   |
| GO:0014015 BP | GO:0014015 positive      | 13/1414 | 69/18903  | 0.001622703 | 0.0084411 | 0.00540921 | NTN1/HES1/PTN/SERPINE2/ | 13 0.188405797101449  |
| GO:0009141 BP | GO:0009141 nucleoside    | 34/1414 | 267/18903 | 0.001623678 | 0.0084411 | 0.00540921 | NT5E/H19/NDUFB1/ATP5ME/ | 34 0.127340823970037  |
| GO:0010001 BP | GO:0010001 glial cell    | 30/1414 | 227/18903 | 0.001668137 | 0.0086643 | 0.00555228 | MXRA8/SOX4/ID4/GLI3/TSP | 30 0.13215859030837   |
| GO:0033273 BP | GO:0033273 response to   | 15/1414 | 86/18903  | 0.001669593 | 0.0086643 | 0.00555228 | COL1A1/POSTN/STC2/SPP1/ | 15 0.174418604651163  |
| GO:0002705 BP | GO:0002705 positive      | 21/1414 | 140/18903 | 0.001694659 | 0.0087866 | 0.00563062 | CADM1/LAG3/PLCG2/CD55/T | 21 0.15               |
| GO:0048592 BP | GO:0048592 eye           | 23/1414 | 159/18903 | 0.001718444 | 0.0089020 | 0.00570458 | COL5A1/COL5A2/THY1/AQP1 | 23 0.144654088050314  |
| GO:1900407 BP | GO:1900407 regulation of | 16/1414 | 95/18903  | 0.001738175 | 0.0089962 | 0.00576496 | FOXP1/H19/STK26/MMP3/SO | 16 0.168421052631579  |
| GO:0000041 BP | GO:0000041 transition    | 17/1414 | 104/18903 | 0.001773980 | 0.0091653 | 0.00587329 | SLC40A1/MELTF/TF/SLC39A | 17 0.163461538461538  |
| GO:1902882 BP | GO:1902882 regulation of | 17/1414 | 104/18903 | 0.001773980 | 0.0091653 | 0.00587329 | FOXP1/H19/STK26/MMP3/SO | 17 0.163461538461538  |
| GO:0043491 BP | GO:0043491 protein       | 29/1414 | 218/18903 | 0.001785898 | 0.0092187 | 0.00590752 | ZFP36L1/PIK3R3/CHI3L1/H | 29 0.13302752293578   |
| GO:0098876 BP | GO:0098876 vesicle-      | 22/1414 | 150/18903 | 0.001789853 | 0.0092309 | 0.00591537 | ANK3/STEAP2/RAB13/ARL4C | 22 0.146666666666667  |
| GO:0045916 BP | GO:0045916 negative      | 5/1414  | 13/18903  | 0.001798832 | 0.0092407 | 0.00592162 | A2M/CD55/CD59/VSIG4/SER | 5 0.384615384615385   |
| GO:0060213 BP | GO:0060213 positive      | 5/1414  | 13/18903  | 0.001798832 | 0.0092407 | 0.00592162 | TNRC6A/ZFP36/BTG2/TOB1/ | 5 0.384615384615385   |
| GO:0060670 BP | GO:0060670 branching     | 5/1414  | 13/18903  | 0.001798832 | 0.0092407 | 0.00592162 | SOCS3/SPINT2/ADM/FGFR2/ | 5 0.384615384615385   |
| GO:1903054 BP | GO:1903054 negative      | 5/1414  | 13/18903  | 0.001798832 | 0.0092407 | 0.00592162 | ANTXR1/FAP/CHADL/TGFB1/ | 5 0.384615384615385   |

|               |                          |         |           |             |           |            |                         |    |                   |
|---------------|--------------------------|---------|-----------|-------------|-----------|------------|-------------------------|----|-------------------|
| GO:0055010 BP | GO:0055010 ventricular   | 10/1414 | 46/18903  | 0.001801250 | 0.0092407 | 0.00592162 | RBPJ/TPM1/COL11A1/TGFB1 | 10 | 0.217391304347826 |
| GO:1904752 BP | GO:1904752 regulation of | 10/1414 | 46/18903  | 0.001801250 | 0.0092407 | 0.00592162 | TPM1/DOCK4/MEF2C/GNA13/ | 10 | 0.217391304347826 |
| GO:0090090 BP | GO:0090090 negative      | 21/1414 | 141/18903 | 0.001854172 | 0.0095038 | 0.00609024 | IGFBP4/EGR1/DKK3/DAB2/G | 21 | 0.148936170212766 |
| GO:0003148 BP | GO:0003148 outflow tract | 7/1414  | 25/18903  | 0.001870292 | 0.0095278 | 0.00610564 | SEMA3C/NRP2/FGFR2/NRP1/ | 7  | 0.28              |
| GO:0046641 BP | GO:0046641 positive      | 7/1414  | 25/18903  | 0.001870292 | 0.0095278 | 0.00610564 | CD55/PTPRC/IL18/HLA-    | 7  | 0.28              |
| GO:0046697 BP | GO:0046697 decidualizati | 7/1414  | 25/18903  | 0.001870292 | 0.0095278 | 0.00610564 | PTN/JUNB/STC2/SPP1/PTGS | 7  | 0.28              |
| GO:0046885 BP | GO:0046885 regulation of | 7/1414  | 25/18903  | 0.001870292 | 0.0095278 | 0.00610564 | EGR1/DKK3/DAB2/STC2/BMP | 7  | 0.28              |
| GO:0086064 BP | GO:0086064 cell          | 7/1414  | 25/18903  | 0.001870292 | 0.0095278 | 0.00610564 | GJA1/CALM2/CAV1/ATP1B1/ | 7  | 0.28              |
| GO:0098581 BP | GO:0098581 detection of  | 7/1414  | 25/18903  | 0.001870292 | 0.0095278 | 0.00610564 | HLA-                    | 7  | 0.28              |
| GO:2000209 BP | GO:2000209 regulation of | 7/1414  | 25/18903  | 0.001870292 | 0.0095278 | 0.00610564 | PIK3R3/CAV1/ITGA5/MCL1/ | 7  | 0.28              |
| GO:0008543 BP | GO:0008543 fibroblast    | 15/1414 | 87/18903  | 0.001880798 | 0.0095730 | 0.00613457 | SMOC2/SULF2/FGFRL1/FGFR | 15 | 0.172413793103448 |
| GO:0009199 BP | GO:0009199 ribonucleosid | 32/1414 | 249/18903 | 0.001888092 | 0.0096017 | 0.00615299 | NT5E/H19/NDUFB1/ATP5ME/ | 32 | 0.1285140562249   |
| GO:0042149 BP | GO:0042149 cellular      | 11/1414 | 54/18903  | 0.001893385 | 0.0096058 | 0.00615563 | XBP1/UPP1/ATF4/HSPA5/PM | 11 | 0.203703703703704 |
| GO:0045778 BP | GO:0045778 positive      | 11/1414 | 54/18903  | 0.001893385 | 0.0096058 | 0.00615563 | PTN/ZBTB16/FAM20C/BMP2/ | 11 | 0.203703703703704 |
| GO:0120032 BP | GO:0120032 regulation of | 27/1414 | 199/18903 | 0.001893841 | 0.0096058 | 0.00615563 | CAPZB/DPYSL3/PIK3R1/ICA | 27 | 0.135678391959799 |
| GO:0061614 BP | GO:0061614 miRNA         | 12/1414 | 62/18903  | 0.001904552 | 0.0096434 | 0.00617970 | JUN/EGR1/FOS/ETS1/BMP2/ | 12 | 0.193548387096774 |
| GO:0061951 BP | GO:0061951 establishment | 12/1414 | 62/18903  | 0.001904552 | 0.0096434 | 0.00617970 | ANK3/AFDN/RAB31/RAB10/A | 12 | 0.193548387096774 |
| GO:0048588 BP | GO:0048588 developmental | 30/1414 | 229/18903 | 0.001913032 | 0.0096779 | 0.00620183 | FOXP1/SEMA3C/NTN1/SPP1/ | 30 | 0.131004366812227 |
| GO:0034250 BP | GO:0034250 positive      | 24/1414 | 170/18903 | 0.001931068 | 0.0097607 | 0.00625487 | SOX4/LARP6/RPS4X/PPP1R1 | 24 | 0.141176470588235 |
| GO:0045807 BP | GO:0045807 positive      | 16/1414 | 96/18903  | 0.001944082 | 0.0098052 | 0.00628339 | DAB2/PLCG2/TF/MAGI2/ANX | 16 | 0.166666666666667 |
| GO:0032570 BP | GO:0032570 response to   | 9/1414  | 39/18903  | 0.001944915 | 0.0098052 | 0.00628339 | FOSE/FOS/TGFB1/CAV1/TXN | 9  | 0.230769230769231 |
| GO:0090077 BP | GO:0090077 foam cell     | 9/1414  | 39/18903  | 0.001944915 | 0.0098052 | 0.00628339 | ABCA5/PLA2G2A/NFKBIA/SE | 9  | 0.230769230769231 |
| GO:0030203 BP | GO:0030203 glycosaminogl | 19/1414 | 123/18903 | 0.001949245 | 0.0098101 | 0.00628651 | PDGFRB/DSEL/DSE/XYL1/C  | 19 | 0.154471544715447 |
| GO:0097237 BP | GO:0097237 cellular      | 19/1414 | 123/18903 | 0.001949245 | 0.0098101 | 0.00628651 | GPX8/H19/PRDX4/GPX3/SOD | 19 | 0.154471544715447 |
| GO:0035265 BP | GO:0035265 organ growth  | 25/1414 | 180/18903 | 0.001979319 | 0.0099529 | 0.00637800 | FOXP1/PDGFRB/ECM1/RSP02 | 25 | 0.138888888888889 |
| GO:0003180 BP | GO:0003180 aortic valve  | 8/1414  | 32/18903  | 0.001994490 | 0.0099861 | 0.00639930 | TWIST1/SNAI1/TGFB1/RB1/ | 8  | 0.25              |
| GO:0007435 BP | GO:0007435 salivary      | 8/1414  | 32/18903  | 0.001994490 | 0.0099861 | 0.00639930 | SEMA3C/TGM2/TGFB1/FGFR2 | 8  | 0.25              |
| GO:0010644 BP | GO:0010644 cell          | 8/1414  | 32/18903  | 0.001994490 | 0.0099861 | 0.00639930 | GJA1/ANK3/CALM2/CAV1/AT | 8  | 0.25              |
| GO:0048710 BP | GO:0048710 regulation of | 8/1414  | 32/18903  | 0.001994490 | 0.0099861 | 0.00639930 | ID4/HES1/NR1D1/SERPINE2 | 8  | 0.25              |
| GO:0060674 BP | GO:0060674 placenta      | 8/1414  | 32/18903  | 0.001994490 | 0.0099861 | 0.00639930 | SOCS3/RBPJ/NOTCH2/HES1/ | 8  | 0.25              |
| GO:0000028 BP | GO:0000028 ribosomal     | 6/1414  | 19/18903  | 0.002011224 | 0.0099996 | 0.00640793 | RPL38/RPS27L/RPS27/RPS1 | 6  | 0.315789473684211 |
| GO:0002283 BP | GO:0002283 neutrophil    | 6/1414  | 19/18903  | 0.002011224 | 0.0099996 | 0.00640793 | TYROBP/FCER1G/ITGB2/SPI | 6  | 0.315789473684211 |
| GO:0060977 BP | GO:0060977 coronary      | 6/1414  | 19/18903  | 0.002011224 | 0.0099996 | 0.00640793 | PDGFRB/FGF2/VEGFA/TGFBR | 6  | 0.315789473684211 |
| GO:0061298 BP | GO:0061298 retina        | 6/1414  | 19/18903  | 0.002011224 | 0.0099996 | 0.00640793 | PDGFRA/PDGFRB/NRP1/CYP1 | 6  | 0.315789473684211 |
| GO:0071800 BP | GO:0071800 podosome      | 6/1414  | 19/18903  | 0.002011224 | 0.0099996 | 0.00640793 | GSN/LCP1/RHOA/MSN/ASAP1 | 6  | 0.315789473684211 |
| GO:0097284 BP | GO:0097284 hepatocyte    | 6/1414  | 19/18903  | 0.002011224 | 0.0099996 | 0.00640793 | H19/GSN/CFLAR/RB1/STK4/ | 6  | 0.315789473684211 |

|               |                          |         |           |             |           |            |                         |    |                   |
|---------------|--------------------------|---------|-----------|-------------|-----------|------------|-------------------------|----|-------------------|
| GO:2001185 BP | GO:2001185 regulation of | 6/1414  | 19/18903  | 0.002011224 | 0.0099996 | 0.00640793 | RUNX1/NCKAP1L/HLA-      | 6  | 0.315789473684211 |
| GO:0002437 BP | GO:0002437 inflammatory  | 14/1414 | 79/18903  | 0.002012735 | 0.0099996 | 0.00640793 | RBPJ/NOTCH2/PSMB4/A2M/H | 14 | 0.177215189873418 |
| GO:0071695 BP | GO:0071695 anatomical    | 32/1414 | 250/18903 | 0.002014056 | 0.0099996 | 0.00640793 | MMP2/RBPJ/HES1/DDIT3/ZB | 32 | 0.128             |
| GO:0043433 BP | GO:0043433 negative      | 26/1414 | 190/18903 | 0.002014322 | 0.0099996 | 0.00640793 | TWIST1/FLNA/ID3/HES1/DD | 26 | 0.136842105263158 |
| GO:1904064 BP | GO:1904064 positive      | 24/1414 | 171/18903 | 0.002090985 | 0.0103678 | 0.00664388 | THY1/FLNA/VMP1/ANK3/PLC | 24 | 0.140350877192982 |
| GO:0002244 BP | GO:0002244 hematopoietic | 20/1414 | 133/18903 | 0.002092048 | 0.0103678 | 0.00664388 | PDGFRA/SOX4/HES1/ZFP36/ | 20 | 0.150375939849624 |
| GO:0002312 BP | GO:0002312 B cell        | 15/1414 | 88/18903  | 0.002113793 | 0.0104666 | 0.00670724 | LGALS1/NOTCH2/PLCG2/ITM | 15 | 0.170454545454545 |
| GO:0070849 BP | GO:0070849 response to   | 10/1414 | 47/18903  | 0.002137280 | 0.0105650 | 0.00677027 | COL1A1/ZFP36L1/FOS/DAB2 | 10 | 0.212765957446809 |
| GO:1902895 BP | GO:1902895 positive      | 10/1414 | 47/18903  | 0.002137280 | 0.0105650 | 0.00677027 | JUN/EGR1/FOS/ETS1/BMP2/ | 10 | 0.212765957446809 |
| GO:0072089 BP | GO:0072089 stem cell     | 19/1414 | 124/18903 | 0.002144297 | 0.0105907 | 0.00678675 | GJA1/ZFP36L1/RBPJ/PRRX1 | 19 | 0.153225806451613 |
| GO:0032414 BP | GO:0032414 positive      | 18/1414 | 115/18903 | 0.002178462 | 0.0107503 | 0.00688905 | VMP1/ANK3/NDUFA4/PLCG2/ | 18 | 0.156521739130435 |
| GO:0001841 BP | GO:0001841 neural tube   | 17/1414 | 106/18903 | 0.002189134 | 0.0107893 | 0.00691404 | TWIST1/SOX4/CTHRC1/SPIN | 17 | 0.160377358490566 |
| GO:0060491 BP | GO:0060491 regulation of | 27/1414 | 201/18903 | 0.002190063 | 0.0107893 | 0.00691404 | CAPZB/DPYSL3/PIK3R1/ICA | 27 | 0.134328358208955 |
| GO:0070542 BP | GO:0070542 response to   | 12/1414 | 63/18903  | 0.002195601 | 0.0108075 | 0.00692567 | FOXO1/ID3/HES1/PTGS2/PI | 12 | 0.19047619047619  |
| GO:0002931 BP | GO:0002931 response to   | 11/1414 | 55/18903  | 0.002209666 | 0.0108401 | 0.00694659 | EGR1/RCAN1/MAP2K6/SQSTM | 11 | 0.2               |
| GO:0003229 BP | GO:0003229 ventricular   | 11/1414 | 55/18903  | 0.002209666 | 0.0108401 | 0.00694659 | RBPJ/TPM1/COL11A1/TGFB1 | 11 | 0.2               |
| GO:0043525 BP | GO:0043525 positive      | 11/1414 | 55/18903  | 0.002209666 | 0.0108401 | 0.00694659 | DDIT3/NUPR1/ATF4/TYROBP | 11 | 0.2               |
| GO:2000107 BP | GO:2000107 negative      | 11/1414 | 55/18903  | 0.002209666 | 0.0108401 | 0.00694659 | FOXP1/ORMDL3/CD74/HCLS1 | 11 | 0.2               |
| GO:0010324 BP | GO:0010324 membrane      | 21/1414 | 143/18903 | 0.002211668 | 0.0108408 | 0.00694704 | PLCG2/GSN/AIF1/MSR1/ITG | 21 | 0.146853146853147 |
| GO:1990138 BP | GO:1990138 neuron        | 24/1414 | 172/18903 | 0.002262044 | 0.0110785 | 0.00709931 | SEMA3C/NTN1/NRP2/FN1/VE | 24 | 0.13953488372093  |
| GO:0019932 BP | GO:0019932 second-       | 38/1414 | 314/18903 | 0.002267307 | 0.0110949 | 0.00710986 | AQP1/RCAN1/PLCG2/RASD1/ | 38 | 0.121019108280255 |
| GO:0001953 BP | GO:0001953 negative      | 9/1414  | 40/18903  | 0.002345664 | 0.0114304 | 0.00732485 | APOD/PIK3R1/THBS1/SEMA3 | 9  | 0.225             |
| GO:0010863 BP | GO:0010863 positive      | 9/1414  | 40/18903  | 0.002345664 | 0.0114304 | 0.00732485 | PDGFRA/PDGFBR/FGFR1/FGF | 9  | 0.225             |
| GO:0032965 BP | GO:0032965 regulation of | 9/1414  | 40/18903  | 0.002345664 | 0.0114304 | 0.00732485 | PDGFBR/RUNX1/INHBA/LARP | 9  | 0.225             |
| GO:0042307 BP | GO:0042307 positive      | 9/1414  | 40/18903  | 0.002345664 | 0.0114304 | 0.00732485 | FLNA/GLI3/PIK3R1/RAN/TG | 9  | 0.225             |
| GO:0098751 BP | GO:0098751 bone cell     | 9/1414  | 40/18903  | 0.002345664 | 0.0114304 | 0.00732485 | FOXP1/FLNA/FBN1/NOTCH2/ | 9  | 0.225             |
| GO:0033622 BP | GO:0033622 integrin      | 7/1414  | 26/18903  | 0.002396143 | 0.0116278 | 0.00745135 | PIEZO1/FN1/PLEK/FERMT3/ | 7  | 0.269230769230769 |
| GO:0035751 BP | GO:0035751 regulation of | 7/1414  | 26/18903  | 0.002396143 | 0.0116278 | 0.00745135 | ATP6VOC/ATP6VOB/GRN/PPT | 7  | 0.269230769230769 |
| GO:0035994 BP | GO:0035994 response to   | 7/1414  | 26/18903  | 0.002396143 | 0.0116278 | 0.00745135 | JUN/FOS/NFKBIA/GSN/SLC8 | 7  | 0.269230769230769 |
| GO:0036119 BP | GO:0036119 response to   | 7/1414  | 26/18903  | 0.002396143 | 0.0116278 | 0.00745135 | PDGFBR/DDIT3/TLR4/IQGAP | 7  | 0.269230769230769 |
| GO:1900151 BP | GO:1900151 regulation of | 7/1414  | 26/18903  | 0.002396143 | 0.0116278 | 0.00745135 | ZFP36L1/ZFP36/ZFP36L2/T | 7  | 0.269230769230769 |
| GO:0035567 BP | GO:0035567 non-canonical | 13/1414 | 72/18903  | 0.002416838 | 0.0116918 | 0.00749232 | DAB2/CTHRC1/FRZB/GPC6/M | 13 | 0.180555555555556 |
| GO:0070265 BP | GO:0070265 necrotic cell | 13/1414 | 72/18903  | 0.002416838 | 0.0116918 | 0.00749232 | CFLAR/NUPR1/PELI1/BIRC2 | 13 | 0.180555555555556 |
| GO:0007040 BP | GO:0007040 lysosome      | 16/1414 | 98/18903  | 0.002417335 | 0.0116918 | 0.00749232 | ATP6VOC/CHMP4B/ATP6VOB/ | 16 | 0.163265306122449 |
| GO:0080171 BP | GO:0080171 lytic vacuole | 16/1414 | 98/18903  | 0.002417335 | 0.0116918 | 0.00749232 | ATP6VOC/CHMP4B/ATP6VOB/ | 16 | 0.163265306122449 |
| GO:0014013 BP | GO:0014013 regulation of | 17/1414 | 107/18903 | 0.002425406 | 0.0117211 | 0.00751111 | ID4/NTN1/HES1/PTN/NR1D1 | 17 | 0.158878504672897 |

|               |                          |         |           |             |           |            |                         |    |                   |
|---------------|--------------------------|---------|-----------|-------------|-----------|------------|-------------------------|----|-------------------|
| GO:0006874 BP | GO:0006874 cellular      | 35/1414 | 284/18903 | 0.002444753 | 0.0118048 | 0.00756476 | THY1/FLNA/PLCG2/DDIT3/S | 35 | 0.123239436619718 |
| GO:0051056 BP | GO:0051056 regulation of | 37/1414 | 305/18903 | 0.002464395 | 0.0118898 | 0.00761923 | COL3A1/PDGFRB/NOTCH2/CD | 37 | 0.121311475409836 |
| GO:0035850 BP | GO:0035850 epithelial    | 10/1414 | 48/18903  | 0.002521949 | 0.0121475 | 0.00778438 | NOTCH2/MAGI2/MTSS1/MEF2 | 10 | 0.208333333333333 |
| GO:0002218 BP | GO:0002218 activation of | 12/1414 | 64/18903  | 0.002521979 | 0.0121475 | 0.00778438 | HEXIM1/PLCG2/HSP90AA1/T | 12 | 0.1875            |
| GO:0120193 BP | GO:0120193 tight         | 14/1414 | 81/18903  | 0.002565365 | 0.0123462 | 0.00791169 | ACTG1/SNAI1/RAB13/AFDN/ | 14 | 0.172839506172839 |
| GO:0001836 BP | GO:0001836 release of    | 11/1414 | 56/18903  | 0.002567456 | 0.0123462 | 0.00791169 | LMNA/SOD2/PLAUR/PRELID1 | 11 | 0.196428571428571 |
| GO:0032411 BP | GO:0032411 positive      | 19/1414 | 126/18903 | 0.002583947 | 0.0123961 | 0.00794368 | VMP1/ANK3/NDUFA4/PLCG2/ | 19 | 0.150793650793651 |
| GO:0043244 BP | GO:0043244 regulation of | 19/1414 | 126/18903 | 0.002583947 | 0.0123961 | 0.00794368 | CAPZB/LIMA1/SCIN/GSN/TR | 19 | 0.150793650793651 |
| GO:0051100 BP | GO:0051100 negative      | 23/1414 | 164/18903 | 0.002584214 | 0.0123961 | 0.00794368 | JUN/DAB2/ACTB/DDIT3/NFK | 23 | 0.140243902439024 |
| GO:0006596 BP | GO:0006596 polyamine     | 5/1414  | 14/18903  | 0.002627022 | 0.0125396 | 0.00803562 | SRM/SAT1/OAZ1/ODC1/SMS  | 5  | 0.357142857142857 |
| GO:0032486 BP | GO:0032486 Rap protein   | 5/1414  | 14/18903  | 0.002627022 | 0.0125396 | 0.00803562 | RAP2B/RAP1A/RAP1B/PLK2/ | 5  | 0.357142857142857 |
| GO:0048388 BP | GO:0048388 endosomal     | 5/1414  | 14/18903  | 0.002627022 | 0.0125396 | 0.00803562 | ATP6VOC/ATP6VOB/ATP6V1F | 5  | 0.357142857142857 |
| GO:0048711 BP | GO:0048711 positive      | 5/1414  | 14/18903  | 0.002627022 | 0.0125396 | 0.00803562 | HES1/SERPINE2/BMP2/ID2/ | 5  | 0.357142857142857 |
| GO:0051764 BP | GO:0051764 actin         | 5/1414  | 14/18903  | 0.002627022 | 0.0125396 | 0.00803562 | MARCKS/FLNA/DPYSL3/AIF1 | 5  | 0.357142857142857 |
| GO:0061043 BP | GO:0061043 regulation of | 5/1414  | 14/18903  | 0.002627022 | 0.0125396 | 0.00803562 | SMOC2/XBP1/CXCR4/SLC12A | 5  | 0.357142857142857 |
| GO:0006937 BP | GO:0006937 regulation of | 24/1414 | 174/18903 | 0.002640049 | 0.0125812 | 0.00806227 | MYL9/TPM1/TNNT3/NR4A1/T | 24 | 0.137931034482759 |
| GO:0030178 BP | GO:0030178 negative      | 24/1414 | 174/18903 | 0.002640049 | 0.0125812 | 0.00806227 | IGFBP4/EGR1/DKK3/DAB2/G | 24 | 0.137931034482759 |
| GO:0070098 BP | GO:0070098 chemokine-    | 15/1414 | 90/18903  | 0.002651984 | 0.0126174 | 0.00808551 | CCL20/CCL3/CCL3L1/CXCL8 | 15 | 0.166666666666667 |
| GO:2000177 BP | GO:2000177 regulation of | 15/1414 | 90/18903  | 0.002651984 | 0.0126174 | 0.00808551 | ID4/GLI3/CDON/FOXO1/PTN | 15 | 0.166666666666667 |
| GO:0008637 BP | GO:0008637 apoptotic     | 17/1414 | 108/18903 | 0.002682572 | 0.0127422 | 0.00816545 | LMNA/HSPA1A/SOD2/SLC25A | 17 | 0.157407407407407 |
| GO:0061387 BP | GO:0061387 regulation of | 17/1414 | 108/18903 | 0.002682572 | 0.0127422 | 0.00816545 | SEMA3C/NTN1/SPP1/FN1/VE | 17 | 0.157407407407407 |
| GO:0006700 BP | GO:0006700 C21-steroid   | 6/1414  | 20/18903  | 0.002693232 | 0.0127616 | 0.00817792 | EGR1/DKK3/DAB2/BMP2/BMP | 6  | 0.3               |
| GO:0044794 BP | GO:0044794 positive      | 6/1414  | 20/18903  | 0.002693232 | 0.0127616 | 0.00817792 | HSPA8/CSF1R/APOE/CFL1/S | 6  | 0.3               |
| GO:0071243 BP | GO:0071243 cellular      | 6/1414  | 20/18903  | 0.002693232 | 0.0127616 | 0.00817792 | GSTO1/ATF4/ATF3/HMOX1/D | 6  | 0.3               |
| GO:0060415 BP | GO:0060415 muscle tissue | 13/1414 | 73/18903  | 0.002743355 | 0.0129886 | 0.00832335 | COL3A1/RBPJ/TPM1/COL11A | 13 | 0.178082191780822 |
| GO:0045124 BP | GO:0045124 regulation of | 9/1414  | 41/18903  | 0.002809288 | 0.0132792 | 0.00850958 | LTBP3/TF/SPP1/TNFRSF11B | 9  | 0.219512195121951 |
| GO:0050850 BP | GO:0050850 positive      | 9/1414  | 41/18903  | 0.002809288 | 0.0132792 | 0.00850958 | PLCG2/CAMTA1/LMCD1/CCL3 | 9  | 0.219512195121951 |
| GO:2000045 BP | GO:2000045 regulation of | 25/1414 | 185/18903 | 0.002882276 | 0.0135903 | 0.00870898 | GPNMB/ACTB/FHL1/CDKN1A/ | 25 | 0.135135135135135 |
| GO:1902117 BP | GO:1902117 positive      | 14/1414 | 82/18903  | 0.002885250 | 0.0135903 | 0.00870898 | SDCBP/SDC4/LCP1/RHOA/MS | 14 | 0.170731707317073 |
| GO:1905897 BP | GO:1905897 regulation of | 14/1414 | 82/18903  | 0.002885250 | 0.0135903 | 0.00870898 | HSPA1A/DDIT3/PIK3R1/XBP | 14 | 0.170731707317073 |
| GO:2000736 BP | GO:2000736 regulation of | 14/1414 | 82/18903  | 0.002885250 | 0.0135903 | 0.00870898 | PDGFRA/LBH/LTBP3/SOX5/H | 14 | 0.170731707317073 |
| GO:0031100 BP | GO:0031100 animal organ  | 12/1414 | 65/18903  | 0.002886765 | 0.0135903 | 0.00870898 | GLI3/CEBPB/ADM/TGFBR3/C | 12 | 0.184615384615385 |
| GO:0043300 BP | GO:0043300 regulation of | 10/1414 | 49/18903  | 0.002960134 | 0.0139222 | 0.00892162 | RABGEF1/VAMP8/ITGB2/SPI | 10 | 0.204081632653061 |
| GO:0046822 BP | GO:0046822 regulation of | 17/1414 | 109/18903 | 0.002962024 | 0.0139222 | 0.00892162 | FLNA/GLI3/APOD/PIK3R1/R | 17 | 0.155963302752294 |
| GO:0002532 BP | GO:0002532 production of | 16/1414 | 100/18903 | 0.002982616 | 0.0139964 | 0.00896919 | H19/APOD/ALOX5AP/VAMP8/ | 16 | 0.16              |
| GO:0036473 BP | GO:0036473 cell death in | 16/1414 | 100/18903 | 0.002982616 | 0.0139964 | 0.00896919 | FOXP1/STK26/MMP3/SOD2/T | 16 | 0.16              |

|               |                                    |         |           |             |           |            |                                                    |                      |
|---------------|------------------------------------|---------|-----------|-------------|-----------|------------|----------------------------------------------------|----------------------|
| GO:0007431 BP | GO:0007431 salivary                | 8/1414  | 34/18903  | 0.003012523 | 0.0140688 | 0.00901560 | SEMA3C/TGM2/TGFB1/FGFR2                            | 8 0.235294117647059  |
| GO:0010765 BP | GO:0010765 positive                | 8/1414  | 34/18903  | 0.003012523 | 0.0140688 | 0.00901560 | ANK3/FXYD1/GLRX/ATP1B3/                            | 8 0.235294117647059  |
| GO:0055094 BP | GO:0055094 response to             | 8/1414  | 34/18903  | 0.003012523 | 0.0140688 | 0.00901560 | GAS5/FCER1G/ITGB2/CD68/                            | 8 0.235294117647059  |
| GO:0090022 BP | GO:0090022 regulation of           | 8/1414  | 34/18903  | 0.003012523 | 0.0140688 | 0.00901560 | TNFAIP6/CD74/C3AR1/CXCL                            | 8 0.235294117647059  |
| GO:0090162 BP | GO:0090162 establishment           | 8/1414  | 34/18903  | 0.003012523 | 0.0140688 | 0.00901560 | HES1/FRMD4B/CDC42/RHOA/                            | 8 0.235294117647059  |
| GO:1902624 BP | GO:1902624 positive                | 8/1414  | 34/18903  | 0.003012523 | 0.0140688 | 0.00901560 | CD99/SELENOK/CD74/C3AR1                            | 8 0.235294117647059  |
| GO:0001783 BP | GO:0001783 B cell                  | 7/1414  | 27/18903  | 0.003028796 | 0.0141110 | 0.00904259 | FOXP1/ORMDL3/CD74/LYN/B                            | 7 0.259259259259259  |
| GO:0003171 BP | GO:0003171 atrioventricu           | 7/1414  | 27/18903  | 0.003028796 | 0.0141110 | 0.00904259 | TWIST1/SOX4/BMP2/CCN1/E                            | 7 0.259259259259259  |
| GO:0042730 BP | GO:0042730 fibrinolysis            | 7/1414  | 27/18903  | 0.003028796 | 0.0141110 | 0.00904259 | FAP/ANXA2/PLAUR/THBS1/S                            | 7 0.259259259259259  |
| GO:0007548 BP | GO:0007548 sex                     | 35/1414 | 288/18903 | 0.003080657 | 0.0143411 | 0.00919008 | MMP2/PDGFRB/PDGFRB/COL9                            | 35 0.121527777777777 |
| GO:0045471 BP | GO:0045471 response to             | 19/1414 | 128/18903 | 0.003096726 | 0.0144044 | 0.00923065 | FOS/CTSK/CD01/SOD2/VCAM                            | 19 0.1484375         |
| GO:0003281 BP | GO:0003281 ventricular             | 13/1414 | 74/18903  | 0.003105032 | 0.0144171 | 0.00923874 | SOX4/RBPJ/HES1/FGFRL1/F                            | 13 0.175675675675676 |
| GO:2000628 BP | GO:2000628 regulation of           | 13/1414 | 74/18903  | 0.003105032 | 0.0144171 | 0.00923874 | JUN/EGR1/FOS/KCNQ10T1/E                            | 13 0.175675675675676 |
| GO:0002768 BP | GO:0002768 immune                  | 40/1414 | 341/18903 | 0.003106857 | 0.0144171 | 0.00923874 | THY1/FOXP1/PLCG2/PDE4B/                            | 40 0.117302052785924 |
| GO:0032609 BP | GO:0032609 interferon-             | 18/1414 | 119/18903 | 0.003193306 | 0.0147947 | 0.00948073 | DDIT3/INHBA/PDE4B/HSPD1                            | 18 0.151260504201681 |
| GO:0032649 BP | GO:0032649 regulation of           | 18/1414 | 119/18903 | 0.003193306 | 0.0147947 | 0.00948073 | DDIT3/INHBA/PDE4B/HSPD1                            | 18 0.151260504201681 |
| GO:1905477 BP | GO:1905477 positive                | 16/1414 | 101/18903 | 0.003303799 | 0.0152861 | 0.00979563 | ANK3/PIK3R1/SQSTM1/NMT1                            | 16 0.158415841584158 |
| GO:0046034 BP | GO:0046034 ATP metabolic           | 28/1414 | 217/18903 | 0.003304611 | 0.0152861 | 0.00979563 | NT5E/H19/NDUFBI/ATP5ME/                            | 28 0.129032258064516 |
| GO:0016050 BP | GO:0016050 vesicle<br>organization | 41/1414 | 353/18903 | 0.003321440 | 0.0153517 | 0.00983771 | AQP1/ZEB2/EEA1/SERPINE2<br>/SDCBP/ATP6VOC/SQSTM1/R | 41 0.11614730878187  |
| GO:1902115 BP | GO:1902115 regulation of           | 27/1414 | 207/18903 | 0.003327241 | 0.0153664 | 0.00984709 | PTPRD/HSPA1A/HSPA1B/GSN                            | 27 0.130434782608696 |
| GO:0000910 BP | GO:0000910 cytokinesis             | 25/1414 | 187/18903 | 0.003330423 | 0.0153689 | 0.00984871 | SEPTIN11/ANK3/RHOC/CHMP                            | 25 0.133689839572193 |
| GO:0014002 BP | GO:0014002 astrocyte               | 9/1414  | 42/18903  | 0.003342399 | 0.0153755 | 0.00985294 | TSPAN2/NR1D1/C1QA/C5AR1                            | 9 0.214285714285714  |
| GO:0031670 BP | GO:0031670 cellular                | 9/1414  | 42/18903  | 0.003342399 | 0.0153755 | 0.00985294 | COL1A1/POSTN/XBP1/FOLR2                            | 9 0.214285714285714  |
| GO:0071604 BP | GO:0071604 transforming            | 9/1414  | 42/18903  | 0.003342399 | 0.0153755 | 0.00985294 | COL3A1/LTBP1/LUM/FN1/PT                            | 9 0.214285714285714  |
| GO:1900274 BP | GO:1900274 regulation of           | 9/1414  | 42/18903  | 0.003342399 | 0.0153755 | 0.00985294 | PDGFRA/PDGFRB/FGFR1/FGF                            | 9 0.214285714285714  |
| GO:0045931 BP | GO:0045931 positive                | 19/1414 | 129/18903 | 0.003383343 | 0.0155516 | 0.00996578 | SMOC2/HES1/ANXA1/RGCC/D                            | 19 0.147286821705426 |
| GO:0045620 BP | GO:0045620 negative                | 11/1414 | 58/18903  | 0.003423126 | 0.0157221 | 0.01007502 | RUNX1/GLI3/LAG3/INHBA/A                            | 11 0.189655172413793 |
| GO:0045661 BP | GO:0045661 regulation of           | 13/1414 | 75/18903  | 0.003504591 | 0.0160583 | 0.01029049 | ZFP36L1/SOX4/ACTB/CDON/                            | 13 0.173333333333333 |
| GO:0050810 BP | GO:0050810 regulation of           | 13/1414 | 75/18903  | 0.003504591 | 0.0160583 | 0.01029049 | EGR1/DKK3/DAB2/IGFBP7/S                            | 13 0.173333333333333 |
| GO:0120192 BP | GO:0120192 tight                   | 13/1414 | 75/18903  | 0.003504591 | 0.0160583 | 0.01029049 | ACTG1/SNAI1/RAB13/AFDN/                            | 13 0.173333333333333 |
| GO:0048639 BP | GO:0048639 positive                | 23/1414 | 168/18903 | 0.003519573 | 0.0161143 | 0.01032636 | RBPJ/NTN1/FN1/FGF2/VEGF                            | 23 0.136904761904762 |
| GO:0060445 BP | GO:0060445 branching               | 6/1414  | 21/18903  | 0.003534772 | 0.0161215 | 0.01033098 | SEMA3C/TGM2/FGFR2/NRP1/                            | 6 0.285714285714286  |
| GO:0071605 BP | GO:0071605 monocyte                | 6/1414  | 21/18903  | 0.003534772 | 0.0161215 | 0.01033098 | TWIST1/APOD/TRPV4/SELEN                            | 6 0.285714285714286  |
| GO:0071637 BP | GO:0071637 regulation of           | 6/1414  | 21/18903  | 0.003534772 | 0.0161215 | 0.01033098 | TWIST1/APOD/TRPV4/SELEN                            | 6 0.285714285714286  |
| GO:2000047 BP | GO:2000047 regulation of           | 6/1414  | 21/18903  | 0.003534772 | 0.0161215 | 0.01033098 | BMP6/RGCC/VEGFA/AFDN/TJ                            | 6 0.285714285714286  |

|               |                                         |         |           |                         |                        |                        |                                                    |    |                   |
|---------------|-----------------------------------------|---------|-----------|-------------------------|------------------------|------------------------|----------------------------------------------------|----|-------------------|
| GO:0008277 BP | GO:0008277 regulation of                | 20/1414 | 139/18903 | 0.003534964             | 0.0161215              | 0.01033098             | RGS16/SLC39A14/PDE4B/AD                            | 20 | 0.143884892086331 |
| GO:0019722 BP | GO:0019722 calcium-                     | 27/1414 | 208/18903 | 0.003558504             | 0.0162162              | 0.01039165             | RCAN1/PLCG2/VCAM1/SELEN                            | 27 | 0.129807692307692 |
| GO:0002440 BP | GO:0002440 production of<br>molecular   | 39/1414 | 333/18903 | 0.003567621<br>49838105 | 0.0162450<br>711944236 | 0.01041014<br>33425787 | TWIST1/PLCG2/RBP4/XBP1/<br>CD55/DNAJB9/TGFB1/RABGE | 39 | 0.117117117117117 |
| GO:0120034 BP | GO:0120034 positive                     | 17/1414 | 111/18903 | 0.003593623             | 0.0163507              | 0.01047783             | DPYSL3/PIK3R1/HSP90AA1/                            | 17 | 0.153153153153153 |
| GO:0051851 BP | GO:0051851 modulation by                | 14/1414 | 84/18903  | 0.003623312             | 0.0164729              | 0.01055616             | JUN/EEA1/HSPA8/SAP30/CS                            | 14 | 0.166666666666667 |
| GO:0090150 BP | GO:0090150 establishment                | 33/1414 | 270/18903 | 0.003637388             | 0.0165240              | 0.01058892             | ANK3/SDCBP/CHMP4B/RABGE                            | 33 | 0.122222222222222 |
| GO:0022898 BP | GO:0022898 regulation of                | 35/1414 | 291/18903 | 0.003646016             | 0.0165323              | 0.01059424             | TWIST1/ACTB/VMP1/FHL1/A                            | 35 | 0.120274914089347 |
| GO:0061351 BP | GO:0061351 neural                       | 21/1414 | 149/18903 | 0.003651503             | 0.0165323              | 0.01059424             | ID4/GLI3/CDON/SOX5/FOXO                            | 21 | 0.140939597315436 |
| GO:0030212 BP | GO:0030212 hyaluronan                   | 8/1414  | 35/18903  | 0.003653390             | 0.0165323              | 0.01059424             | FGF2/TGFB1/CD44/TNFAIP6                            | 8  | 0.228571428571429 |
| GO:0043372 BP | GO:0043372 positive                     | 8/1414  | 35/18903  | 0.003653390             | 0.0165323              | 0.01059424             | ANXA1/NFKBIZ/HLA-                                  | 8  | 0.228571428571429 |
| GO:1905898 BP | GO:1905898 positive                     | 8/1414  | 35/18903  | 0.003653390             | 0.0165323              | 0.01059424             | DDIT3/PIK3R1/XBP1/CAV1/                            | 8  | 0.228571428571429 |
| GO:0022406 BP | GO:0022406 membrane                     | 15/1414 | 93/18903  | 0.003667406             | 0.0165572              | 0.01061020             | VMP1/VCAM1/ICAM1/RAB13/                            | 15 | 0.161290322580645 |
| GO:0051781 BP | GO:0051781 positive                     | 15/1414 | 93/18903  | 0.003667406             | 0.0165572              | 0.01061020             | LBH/PTN/FGF2/TGFB1/FGF1                            | 15 | 0.161290322580645 |
| GO:0070301 BP | GO:0070301 cellular                     | 15/1414 | 93/18903  | 0.003667406             | 0.0165572              | 0.01061020             | FOXP1/AQP1/STK26/TXN/AN                            | 15 | 0.161290322580645 |
| GO:0002679 BP | GO:0002679 respiratory                  | 5/1414  | 15/18903  | 0.003700000             | 0.0165633              | 0.01061412             | SELENOK/NCF1/TREM2/GRN/                            | 5  | 0.333333333333333 |
| GO:0002903 BP | GO:0002903 negative                     | 5/1414  | 15/18903  | 0.003700000             | 0.0165633              | 0.01061412             | FOXP1/ORMDL3/CD74/SLC39                            | 5  | 0.333333333333333 |
| GO:0032905 BP | GO:0032905 transforming                 | 5/1414  | 15/18903  | 0.003700000             | 0.0165633              | 0.01061412             | COL3A1/LUM/TYROBP/ATP6A                            | 5  | 0.333333333333333 |
| GO:0035358 BP | GO:0035358 regulation of                | 5/1414  | 15/18903  | 0.003700000             | 0.0165633              | 0.01061412             | TWIST1/BMP2/FABP5/CITED                            | 5  | 0.333333333333333 |
| GO:0043129 BP | GO:0043129 surfactant                   | 5/1414  | 15/18903  | 0.003700000             | 0.0165633              | 0.01061412             | VEGFA/CTSH/EPAS1/ADGRF5                            | 5  | 0.333333333333333 |
| GO:0043518 BP | GO:0043518 negative                     | 5/1414  | 15/18903  | 0.003700000             | 0.0165633              | 0.01061412             | TWIST1/SNAI1/CD44/PTTG1                            | 5  | 0.333333333333333 |
| GO:0060211 BP | GO:0060211 regulation of                | 5/1414  | 15/18903  | 0.003700000             | 0.0165633              | 0.01061412             | TNRC6A/ZFP36/BTG2/TOB1/                            | 5  | 0.333333333333333 |
| GO:0060347 BP | GO:0060347 heart                        | 5/1414  | 15/18903  | 0.003700000             | 0.0165633              | 0.01061412             | RBP4/TGFBR3/FKBP1A/ADAM                            | 5  | 0.333333333333333 |
| GO:0071639 BP | GO:0071639 positive                     | 5/1414  | 15/18903  | 0.003700000             | 0.0165633              | 0.01061412             | TWIST1/TRPV4/SELENOK/CL                            | 5  | 0.333333333333333 |
| GO:0090280 BP | GO:0090280 positive                     | 5/1414  | 15/18903  | 0.003700000             | 0.0165633              | 0.01061412             | PDGFRB/CCL3/CCL2/PDGFB/                            | 5  | 0.333333333333333 |
| GO:1900153 BP | GO:1900153 positive                     | 5/1414  | 15/18903  | 0.003700000             | 0.0165633              | 0.01061412             | ZFP36L1/ZFP36/ZFP36L2/T                            | 5  | 0.333333333333333 |
| GO:0000303 BP | GO:0000303 response to                  | 7/1414  | 28/18903  | 0.003781577             | 0.0168896              | 0.01082322             | H19/SOD2/PRDX1/SOD3/GLR                            | 7  | 0.25              |
| GO:0003416 BP | GO:0003416 endochondral                 | 7/1414  | 28/18903  | 0.003781577             | 0.0168896              | 0.01082322             | ECM1/COMP/COL27A1/FGFR3                            | 7  | 0.25              |
| GO:1903319 BP | GO:1903319 positive                     | 7/1414  | 28/18903  | 0.003781577             | 0.0168896              | 0.01082322             | SOX4/MELTF/GSN/ANXA2/EN                            | 7  | 0.25              |
| GO:0051090 BP | GO:0051090 regulation of<br>DNA-binding | 50/1414 | 454/18903 | 0.003826397<br>54244541 | 0.0170563<br>079108074 | 0.01092999<br>8897611  | TWIST1/FLNA/GLI3/ID3/PL<br>CG2/HSPA1A/HES1/HSPA1B/ | 50 | 0.110132158590308 |
| GO:0009746 BP | GO:0009746 response to                  | 26/1414 | 199/18903 | 0.003827654             | 0.0170563              | 0.01092999             | EGR1/SOX4/COL6A2/SLC29A                            | 26 | 0.130653266331658 |
| GO:0032388 BP | GO:0032388 positive                     | 26/1414 | 199/18903 | 0.003827654             | 0.0170563              | 0.01092999             | DAB2/FLNA/GLI3/ANK3/PIK                            | 26 | 0.130653266331658 |
| GO:0042306 BP | GO:0042306 regulation of                | 11/1414 | 59/18903  | 0.003929217             | 0.0174821              | 0.01120289             | FLNA/GLI3/APOD/PIK3R1/R                            | 11 | 0.186440677966102 |
| GO:0071709 BP | GO:0071709 membrane                     | 11/1414 | 59/18903  | 0.003929217             | 0.0174821              | 0.01120289             | MAFB/PTPRD/ANK3/ANXA2/C                            | 11 | 0.186440677966102 |
| GO:0001937 BP | GO:0001937 negative                     | 13/1414 | 76/18903  | 0.003944862             | 0.0175295              | 0.01123327             | CNMD/SPARC/RGCC/CAV1/CC                            | 13 | 0.171052631578947 |

|               |                          |         |           |             |           |            |                         |    |                   |
|---------------|--------------------------|---------|-----------|-------------|-----------|------------|-------------------------|----|-------------------|
| GO:0048259 BP | GO:0048259 regulation of | 17/1414 | 112/18903 | 0.003948824 | 0.0175295 | 0.01123327 | DAB2/PLCG2/TF/MAGI2/SDC | 17 | 0.151785714285714 |
| GO:0045622 BP | GO:0045622 regulation of | 9/1414  | 43/18903  | 0.003951892 | 0.0175295 | 0.01123327 | JUNB/ANXA1/NFKBIZ/HLA-  | 9  | 0.209302325581395 |
| GO:0045687 BP | GO:0045687 positive      | 9/1414  | 43/18903  | 0.003951892 | 0.0175295 | 0.01123327 | HES1/PTN/SERPINE2/BMP2/ | 9  | 0.209302325581395 |
| GO:0022602 BP | GO:0022602 ovulation     | 10/1414 | 51/18903  | 0.004017680 | 0.0177538 | 0.01137701 | MMP2/PDGFR/ALPHA2/      | 10 | 0.196078431372549 |
| GO:0032873 BP | GO:0032873 negative      | 10/1414 | 51/18903  | 0.004017680 | 0.0177538 | 0.01137701 | FOXO1/DNAJA1/TREM2/TAOK | 10 | 0.196078431372549 |
| GO:0043277 BP | GO:0043277 apoptotic     | 10/1414 | 51/18903  | 0.004017680 | 0.0177538 | 0.01137701 | TGM2/ANXA1/TYROBP/CCL2/ | 10 | 0.196078431372549 |
| GO:0050873 BP | GO:0050873 brown fat     | 10/1414 | 51/18903  | 0.004017680 | 0.0177538 | 0.01137701 | SIX1/DIO2/TRPV4/METRN/  | 10 | 0.196078431372549 |
| GO:0070303 BP | GO:0070303 negative      | 10/1414 | 51/18903  | 0.004017680 | 0.0177538 | 0.01137701 | FOXO1/DNAJA1/TREM2/TAOK | 10 | 0.196078431372549 |
| GO:0050764 BP | GO:0050764 regulation of | 16/1414 | 103/18903 | 0.004031874 | 0.0177896 | 0.01139994 | PLCG2/TGM2/FCER1G/PTPRC | 16 | 0.155339805825243 |
| GO:1903076 BP | GO:1903076 regulation of | 16/1414 | 103/18903 | 0.004031874 | 0.0177896 | 0.01139994 | DAB2/ACTB/PIK3R1/SQSTM1 | 16 | 0.155339805825243 |
| GO:0051302 BP | GO:0051302 regulation of | 25/1414 | 190/18903 | 0.004111950 | 0.0181292 | 0.01161756 | LBH/PTN/FGF2/TGFB1/CALM | 25 | 0.131578947368421 |
| GO:1903531 BP | GO:1903531 negative      | 21/1414 | 151/18903 | 0.004278271 | 0.0188483 | 0.01207834 | GJA1/FOXO1/PIM3/INHBA/N | 21 | 0.139072847682119 |
| GO:0030968 BP | GO:0030968 endoplasmic   | 13/1414 | 77/18903  | 0.004428779 | 0.0194966 | 0.01249382 | DDIT3/STC2/PIK3R1/XBP1/ | 13 | 0.168831168831169 |
| GO:0002011 BP | GO:0002011 morphogenesis | 11/1414 | 60/18903  | 0.004493222 | 0.0196456 | 0.01258930 | COL5A1/FLNA/NOTCH2/PDPN | 11 | 0.183333333333333 |
| GO:0002711 BP | GO:0002711 positive      | 11/1414 | 60/18903  | 0.004493222 | 0.0196456 | 0.01258930 | CD55/HSPD1/HLA-         | 11 | 0.183333333333333 |
| GO:0045638 BP | GO:0045638 negative      | 15/1414 | 95/18903  | 0.004506365 | 0.0196456 | 0.01258930 | MAFB/ZFP36L1/FBN1/ZFP36 | 15 | 0.157894736842105 |
| GO:0002088 BP | GO:0002088 lens          | 14/1414 | 86/18903  | 0.004508341 | 0.0196456 | 0.01258930 | CDON/CRYAB/FGF2/SPRY2/A | 14 | 0.162790697674419 |
| GO:0001765 BP | GO:0001765 membrane raft | 4/1414  | 10/18903  | 0.004538588 | 0.0196456 | 0.01258930 | ANXA2/CAV1/S100A10/CAV2 | 4  | 0.4               |
| GO:0001915 BP | GO:0001915 negative      | 4/1414  | 10/18903  | 0.004538588 | 0.0196456 | 0.01258930 | PTPRC/FCGR2B/NCKAP1L/IL | 4  | 0.4               |
| GO:0002291 BP | GO:0002291 T cell        | 4/1414  | 10/18903  | 0.004538588 | 0.0196456 | 0.01258930 | ICAM1/HLA-              | 4  | 0.4               |
| GO:0003183 BP | GO:0003183 mitral valve  | 4/1414  | 10/18903  | 0.004538588 | 0.0196456 | 0.01258930 | TWIST1/SOX4/EFNA1/BMPR2 | 4  | 0.4               |
| GO:0014012 BP | GO:0014012 peripheral    | 4/1414  | 10/18903  | 0.004538588 | 0.0196456 | 0.01258930 | MMP2/TNC/APOD/MAP1B     | 4  | 0.4               |
| GO:0018401 BP | GO:0018401 peptidyl-     | 4/1414  | 10/18903  | 0.004538588 | 0.0196456 | 0.01258930 | P4HA2/PRDX4/P4HA1/EGLN3 | 4  | 0.4               |
| GO:0031666 BP | GO:0031666 positive      | 4/1414  | 10/18903  | 0.004538588 | 0.0196456 | 0.01258930 | BMP6/CD14/LY96/SASH1    | 4  | 0.4               |
| GO:0035747 BP | GO:0035747 natural       | 4/1414  | 10/18903  | 0.004538588 | 0.0196456 | 0.01258930 | CCL3/CCL2/CCL4/CCL5     | 4  | 0.4               |
| GO:0045657 BP | GO:0045657 positive      | 4/1414  | 10/18903  | 0.004538588 | 0.0196456 | 0.01258930 | ZFP36L1/HLA-            | 4  | 0.4               |
| GO:0046886 BP | GO:0046886 positive      | 4/1414  | 10/18903  | 0.004538588 | 0.0196456 | 0.01258930 | EGR1/DAB2/BMP6/ADM      | 4  | 0.4               |
| GO:0050861 BP | GO:0050861 positive      | 4/1414  | 10/18903  | 0.004538588 | 0.0196456 | 0.01258930 | FOXP1/CMTM3/SLC39A10/PR | 4  | 0.4               |
| GO:0051342 BP | GO:0051342 regulation of | 4/1414  | 10/18903  | 0.004538588 | 0.0196456 | 0.01258930 | SLC39A14/CALM2/CALM3/CA | 4  | 0.4               |
| GO:0062042 BP | GO:0062042 regulation of | 4/1414  | 10/18903  | 0.004538588 | 0.0196456 | 0.01258930 | TWIST1/JAG1/ENG/TGFBR2  | 4  | 0.4               |
| GO:1902946 BP | GO:1902946 protein       | 4/1414  | 10/18903  | 0.004538588 | 0.0196456 | 0.01258930 | NRP1/EZR/MSN/RDX        | 4  | 0.4               |
| GO:1990034 BP | GO:1990034 calcium ion   | 4/1414  | 10/18903  | 0.004538588 | 0.0196456 | 0.01258930 | CALM2/ATP2B1/CALM3/CALM | 4  | 0.4               |
| GO:2000048 BP | GO:2000048 negative      | 4/1414  | 10/18903  | 0.004538588 | 0.0196456 | 0.01258930 | BMP6/RGCC/VEGFA/NOTCH4  | 4  | 0.4               |
| GO:2000271 BP | GO:2000271 positive      | 4/1414  | 10/18903  | 0.004538588 | 0.0196456 | 0.01258930 | NUPR1/STK17A/STK17B/BTG | 4  | 0.4               |
| GO:0002223 BP | GO:0002223 stimulatory   | 6/1414  | 22/18903  | 0.004556931 | 0.0196456 | 0.01258930 | PLCG2/TYROBP/CLEC7A/LYN | 6  | 0.272727272727273 |
| GO:0051220 BP | GO:0051220 cytoplasmic   | 6/1414  | 22/18903  | 0.004556931 | 0.0196456 | 0.01258930 | FLNA/NFKBIA/MDF1/TMSB4X | 6  | 0.272727272727273 |

|               |                          |         |           |             |           |            |                          |       |                 |
|---------------|--------------------------|---------|-----------|-------------|-----------|------------|--------------------------|-------|-----------------|
| GO:0051444 BP | GO:0051444 negative      | 6/1414  | 22/18903  | 0.004556931 | 0.0196456 | 0.01258930 | RPS20/SMAD7/RPS15/RPS7/  | 6 0.  | 272727272727273 |
| GO:0061318 BP | GO:0061318 renal         | 6/1414  | 22/18903  | 0.004556931 | 0.0196456 | 0.01258930 | NOTCH2/MAGI2/IQGAP1/JAG  | 6 0.  | 272727272727273 |
| GO:0072112 BP | GO:0072112 podocyte      | 6/1414  | 22/18903  | 0.004556931 | 0.0196456 | 0.01258930 | NOTCH2/MAGI2/IQGAP1/JAG  | 6 0.  | 272727272727273 |
| GO:1990840 BP | GO:1990840 response to   | 6/1414  | 22/18903  | 0.004556931 | 0.0196456 | 0.01258930 | PLCG2/TYROBP/CLEC7A/LYN  | 6 0.  | 272727272727273 |
| GO:1990858 BP | GO:1990858 cellular      | 6/1414  | 22/18903  | 0.004556931 | 0.0196456 | 0.01258930 | PLCG2/TYROBP/CLEC7A/LYN  | 6 0.  | 272727272727273 |
| GO:1900026 BP | GO:1900026 positive      | 9/1414  | 44/18903  | 0.004644913 | 0.0199194 | 0.01276474 | DAB2/FLNA/NRP1/ARPC2/RA  | 9 0.  | 204545454545455 |
| GO:1904706 BP | GO:1904706 negative      | 9/1414  | 44/18903  | 0.004644913 | 0.0199194 | 0.01276474 | TPM1/NDRG2/SOD2/CDKN1A/  | 9 0.  | 204545454545455 |
| GO:0002762 BP | GO:0002762 negative      | 10/1414 | 52/18903  | 0.004647869 | 0.0199194 | 0.01276474 | MAFB/FBN1/PIK3R1/INHBA/  | 10 0. | 192307692307692 |
| GO:0010939 BP | GO:0010939 regulation of | 10/1414 | 52/18903  | 0.004647869 | 0.0199194 | 0.01276474 | CFLAR/NUPR1/PELI1/BIRC2  | 10 0. | 192307692307692 |
| GO:0099172 BP | GO:0099172 presynapse    | 10/1414 | 52/18903  | 0.004647869 | 0.0199194 | 0.01276474 | PTPRD/FARP1/GPC6/SDCBP/  | 10 0. | 192307692307692 |
| GO:0000305 BP | GO:0000305 response to   | 7/1414  | 29/18903  | 0.004668242 | 0.0199194 | 0.01276474 | H19/SOD2/PRDX1/SOD3/GLR  | 7 0.  | 241379310344828 |
| GO:0001773 BP | GO:0001773 myeloid       | 7/1414  | 29/18903  | 0.004668242 | 0.0199194 | 0.01276474 | RBPJ/NOTCH2/SPI1/PYCARD  | 7 0.  | 241379310344828 |
| GO:0001958 BP | GO:0001958 endochondral  | 7/1414  | 29/18903  | 0.004668242 | 0.0199194 | 0.01276474 | COL1A1/COL2A1/DLX5/BMP6  | 7 0.  | 241379310344828 |
| GO:0003094 BP | GO:0003094 glomerular    | 7/1414  | 29/18903  | 0.004668242 | 0.0199194 | 0.01276474 | AQP1/SULF2/CYBA/GAS6/AD  | 7 0.  | 241379310344828 |
| GO:0003209 BP | GO:0003209 cardiac       | 7/1414  | 29/18903  | 0.004668242 | 0.0199194 | 0.01276474 | SOX4/NOTCH2/BMP2/CCN1/H  | 7 0.  | 241379310344828 |
| GO:0010800 BP | GO:0010800 positive      | 7/1414  | 29/18903  | 0.004668242 | 0.0199194 | 0.01276474 | CHI3L1/TGFB1/CALM2/CAB3  | 7 0.  | 241379310344828 |
| GO:0036075 BP | GO:0036075 replacement   | 7/1414  | 29/18903  | 0.004668242 | 0.0199194 | 0.01276474 | COL1A1/COL2A1/DLX5/BMP6  | 7 0.  | 241379310344828 |
| GO:0070977 BP | GO:0070977 bone          | 7/1414  | 29/18903  | 0.004668242 | 0.0199194 | 0.01276474 | ZBTB16/XYLTI1/BMP2/RFLNB | 7 0.  | 241379310344828 |
| GO:0090025 BP | GO:0090025 regulation of | 7/1414  | 29/18903  | 0.004668242 | 0.0199194 | 0.01276474 | NBL1/AIF1/LYN/LGMN/DUSP  | 7 0.  | 241379310344828 |
| GO:0050792 BP | GO:0050792 regulation of | 22/1414 | 162/18903 | 0.004689504 | 0.0199955 | 0.01281350 | LGALS1/HEXIM1/IFITM1/ZF  | 22 0. | 135802469135802 |
| GO:0002702 BP | GO:0002702 positive      | 19/1414 | 133/18903 | 0.004759609 | 0.0202796 | 0.01299555 | PLCG2/RBP4/XBP1/CD55/DN  | 19 0. | 142857142857143 |
| GO:0070830 BP | GO:0070830 bicellular    | 12/1414 | 69/18903  | 0.004796397 | 0.0204214 | 0.01308644 | SNAI1/RAB13/AFDN/PAK2/R  | 12 0. | 173913043478261 |
| GO:0010212 BP | GO:0010212 response to   | 20/1414 | 143/18903 | 0.004897271 | 0.0208357 | 0.01335192 | EGR1/CRYAB/SOD2/VCAM1/C  | 20 0. | 13986013986014  |
| GO:1902806 BP | GO:1902806 regulation of | 27/1414 | 213/18903 | 0.004928534 | 0.0209534 | 0.01342736 | GPNMB/ACTB/FHL1/PLCG2/C  | 27 0. | 126760563380282 |
| GO:0070373 BP | GO:0070373 negative      | 13/1414 | 78/18903  | 0.004959373 | 0.0210692 | 0.01350154 | DAB2/NDRG2/SPRY2/ATF3/P  | 13 0. | 166666666666667 |
| GO:0001738 BP | GO:0001738 morphogenesis | 15/1414 | 96/18903  | 0.004980862 | 0.0210990 | 0.01352065 | DAB2/ACTG1/ACTB/CTHRC1/  | 15    | 0.15625         |
| GO:0014033 BP | GO:0014033 neural crest  | 15/1414 | 96/18903  | 0.004980862 | 0.0210990 | 0.01352065 | TWIST1/SEMA3C/SIX1/HES1  | 15    | 0.15625         |
| GO:0032091 BP | GO:0032091 negative      | 15/1414 | 96/18903  | 0.004980862 | 0.0210990 | 0.01352065 | DAB2/ACTB/SLPI/CDKN1A/C  | 15    | 0.15625         |
| GO:0046330 BP | GO:0046330 positive      | 15/1414 | 96/18903  | 0.004980862 | 0.0210990 | 0.01352065 | GADD45B/GADD45G/TRPV4/S  | 15    | 0.15625         |
| GO:0055007 BP | GO:0055007 cardiac       | 18/1414 | 124/18903 | 0.004985685 | 0.0211041 | 0.01352392 | PDGFRA/FOXP1/PDGFRB/LMN  | 18 0. | 145161290322581 |
| GO:0034349 BP | GO:0034349 glial cell    | 5/1414  | 16/18903  | 0.005054003 | 0.0213314 | 0.01366956 | CCL2/TREM2/RB1/GAS6/PRK  | 5     | 0.3125          |
| GO:0045986 BP | GO:0045986 negative      | 5/1414  | 16/18903  | 0.005054003 | 0.0213314 | 0.01366956 | KCNMA1/PTGS2/DOCK4/RGS2  | 5     | 0.3125          |
| GO:1902285 BP | GO:1902285 semaphorin-   | 5/1414  | 16/18903  | 0.005054003 | 0.0213314 | 0.01366956 | NRP2/NRP1/PLXND1/PLXNB2  | 5     | 0.3125          |
| GO:1905906 BP | GO:1905906 regulation of | 5/1414  | 16/18903  | 0.005054003 | 0.0213314 | 0.01366956 | CRYAB/APOE/TREM2/APP/PF  | 5     | 0.3125          |
| GO:0042255 BP | GO:0042255 ribosome      | 11/1414 | 61/18903  | 0.005119634 | 0.0215616 | 0.01381708 | RPL23A/RPL38/NOP53/RPS2  | 11 0. | 180327868852459 |
| GO:0046456 BP | GO:0046456 icosanoid     | 11/1414 | 61/18903  | 0.005119634 | 0.0215616 | 0.01381708 | PTGS2/ANXA1/FABP5/PTGES  | 11 0. | 180327868852459 |

|               |                          |         |           |             |           |            |                         |    |                   |
|---------------|--------------------------|---------|-----------|-------------|-----------|------------|-------------------------|----|-------------------|
| GO:1902893 BP | GO:1902893 regulation of | 11/1414 | 61/18903  | 0.005119634 | 0.0215616 | 0.01381708 | JUN/EGR1/FOS/ETS1/BMP2/ | 11 | 0.180327868852459 |
| GO:0003230 BP | GO:0003230 cardiac       | 8/1414  | 37/18903  | 0.005246538 | 0.0219691 | 0.01407825 | SOX4/NOTCH2/BMP2/CCN1/N | 8  | 0.216216216216216 |
| GO:0010934 BP | GO:0010934 macrophage    | 8/1414  | 37/18903  | 0.005246538 | 0.0219691 | 0.01407825 | TWIST1/PLCG2/TGFB1/MAPK | 8  | 0.216216216216216 |
| GO:0010935 BP | GO:0010935 regulation of | 8/1414  | 37/18903  | 0.005246538 | 0.0219691 | 0.01407825 | TWIST1/PLCG2/TGFB1/MAPK | 8  | 0.216216216216216 |
| GO:0044319 BP | GO:0044319 wound         | 8/1414  | 37/18903  | 0.005246538 | 0.0219691 | 0.01407825 | COL5A1/FLNA/PDPN/RHOC/C | 8  | 0.216216216216216 |
| GO:0051385 BP | GO:0051385 response to   | 8/1414  | 37/18903  | 0.005246538 | 0.0219691 | 0.01407825 | FOSB/FOS/CCND1/CYBB/SGK | 8  | 0.216216216216216 |
| GO:0070229 BP | GO:0070229 negative      | 8/1414  | 37/18903  | 0.005246538 | 0.0219691 | 0.01407825 | FOXP1/ORMDL3/CD74/SLC39 | 8  | 0.216216216216216 |
| GO:0071402 BP | GO:0071402 cellular      | 8/1414  | 37/18903  | 0.005246538 | 0.0219691 | 0.01407825 | GAS5/FCER1G/ITGB2/CD68/ | 8  | 0.216216216216216 |
| GO:0090505 BP | GO:0090505 epiboly       | 8/1414  | 37/18903  | 0.005246538 | 0.0219691 | 0.01407825 | COL5A1/FLNA/PDPN/RHOC/C | 8  | 0.216216216216216 |
| GO:0050864 BP | GO:0050864 regulation of | 26/1414 | 204/18903 | 0.005327476 | 0.0222920 | 0.01428518 | ZFP36L1/CDKN1A/INHBA/XB | 26 | 0.127450980392157 |
| GO:0048260 BP | GO:0048260 positive      | 10/1414 | 53/18903  | 0.005353200 | 0.0223516 | 0.01432333 | DAB2/PLCG2/TF/MAGI2/ANX | 10 | 0.188679245283019 |
| GO:0052372 BP | GO:0052372 modulation by | 10/1414 | 53/18903  | 0.005353200 | 0.0223516 | 0.01432333 | LGALS1/IFITM1/GSN/IFITM | 10 | 0.188679245283019 |
| GO:0060071 BP | GO:0060071 Wnt signaling | 10/1414 | 53/18903  | 0.005353200 | 0.0223516 | 0.01432333 | DAB2/CTHRC1/GPC6/MAGI2/ | 10 | 0.188679245283019 |
| GO:0006754 BP | GO:0006754 ATP           | 16/1414 | 106/18903 | 0.005365964 | 0.0223728 | 0.01433696 | H19/NDUFB1/ATP5ME/ATP6V | 16 | 0.150943396226415 |
| GO:1901890 BP | GO:1901890 positive      | 16/1414 | 106/18903 | 0.005365964 | 0.0223728 | 0.01433696 | THBS2/THY1/PTPRD/SDC4/C | 16 | 0.150943396226415 |
| GO:0009749 BP | GO:0009749 response to   | 25/1414 | 194/18903 | 0.005388071 | 0.0224490 | 0.01438574 | EGR1/SOX4/COL6A2/SLC29A | 25 | 0.128865979381443 |
| GO:0014823 BP | GO:0014823 response to   | 12/1414 | 70/18903  | 0.005404144 | 0.0224999 | 0.01441836 | MMP2/FOS/ZEB1/SOD2/METR | 12 | 0.171428571428571 |
| GO:0010596 BP | GO:0010596 negative      | 15/1414 | 97/18903  | 0.005495048 | 0.0228620 | 0.01465043 | FGF2/TGFB1/RGCC/KLF4/AP | 15 | 0.154639175257732 |
| GO:0002292 BP | GO:0002292 T cell        | 13/1414 | 79/18903  | 0.005539772 | 0.0230317 | 0.01475914 | FOXP1/JUNB/ANXA1/NFKBIZ | 13 | 0.164556962025316 |
| GO:0002065 BP | GO:0002065 columnar/cubo | 17/1414 | 116/18903 | 0.005670372 | 0.0235578 | 0.01509633 | SOX4/TUBB/HES1/FAM20C/C | 17 | 0.146551724137931 |
| GO:1903532 BP | GO:1903532 positive      | 33/1414 | 278/18903 | 0.005685827 | 0.0236052 | 0.01512670 | SOX4/DAB2/MAP2K6/RBP4/S | 33 | 0.118705035971223 |
| GO:0001778 BP | GO:0001778 plasma        | 7/1414  | 30/18903  | 0.005702871 | 0.0236088 | 0.01512897 | ANXA2/CHMP4B/S100A10/MY | 7  | 0.233333333333333 |
| GO:0002474 BP | GO:0002474 antigen       | 7/1414  | 30/18903  | 0.005702871 | 0.0236088 | 0.01512897 | FCER1G/IFI30/B2M/HLA-   | 7  | 0.233333333333333 |
| GO:0006027 BP | GO:0006027 glycosaminogl | 7/1414  | 30/18903  | 0.005702871 | 0.0236088 | 0.01512897 | FGF2/TGFB1/CD44/HEXB/GN | 7  | 0.233333333333333 |
| GO:0043032 BP | GO:0043032 positive      | 7/1414  | 30/18903  | 0.005702871 | 0.0236088 | 0.01512897 | JUND/HSPD1/CCL3/TREM2/T | 7  | 0.233333333333333 |
| GO:0045089 BP | GO:0045089 positive      | 20/1414 | 145/18903 | 0.005725842 | 0.0236871 | 0.01517914 | CADM1/HEXIM1/LAG3/PLCG2 | 20 | 0.137931034482759 |
| GO:0051457 BP | GO:0051457 maintenance   | 6/1414  | 23/18903  | 0.005781081 | 0.0238817 | 0.01530387 | TXN/SP100/CHCHD10/SUN2/ | 6  | 0.260869565217391 |
| GO:0072311 BP | GO:0072311 glomerular    | 6/1414  | 23/18903  | 0.005781081 | 0.0238817 | 0.01530387 | NOTCH2/MAGI2/IQGAP1/JAG | 6  | 0.260869565217391 |
| GO:0035904 BP | GO:0035904 aorta         | 11/1414 | 62/18903  | 0.005813084 | 0.0239630 | 0.01535596 | COL3A1/PDGFBR/SOX4/SIX1 | 11 | 0.17741935483871  |
| GO:0070228 BP | GO:0070228 regulation of | 11/1414 | 62/18903  | 0.005813084 | 0.0239630 | 0.01535596 | FOXP1/PRELI1/ORMDL3/CD  | 11 | 0.17741935483871  |
| GO:1903409 BP | GO:1903409 reactive      | 11/1414 | 62/18903  | 0.005813084 | 0.0239630 | 0.01535596 | CCN6/H19/PLCG2/SOD2/CFL | 11 | 0.17741935483871  |
| GO:0051048 BP | GO:0051048 negative      | 23/1414 | 175/18903 | 0.005836519 | 0.0240426 | 0.01540698 | GJA1/FOXO1/PIM3/INHBA/N | 23 | 0.131428571428571 |
| GO:0031330 BP | GO:0031330 negative      | 30/1414 | 247/18903 | 0.005881839 | 0.0241998 | 0.01550774 | FUS/TIMP2/TIMP4/ZFP36/Q | 30 | 0.121457489878543 |
| GO:0002444 BP | GO:0002444 myeloid       | 16/1414 | 107/18903 | 0.005882985 | 0.0241998 | 0.01550774 | S100A13/RABGEF1/TYROBP/ | 16 | 0.149532710280374 |
| GO:0016358 BP | GO:0016358 dendrite      | 29/1414 | 237/18903 | 0.006036968 | 0.0247983 | 0.01589123 | PTPRD/NTN1/FARP1/PTN/LP | 29 | 0.122362869198312 |
| GO:0034764 BP | GO:0034764 positive      | 29/1414 | 237/18903 | 0.006036968 | 0.0247983 | 0.01589123 | THY1/FLNA/VMP1/ANK3/NDU | 29 | 0.122362869198312 |

|               |                          |         |           |             |           |            |                         |    |                   |
|---------------|--------------------------|---------|-----------|-------------|-----------|------------|-------------------------|----|-------------------|
| GO:0014020 BP | GO:0014020 primary       | 15/1414 | 98/18903  | 0.006051261 | 0.0248395 | 0.01591764 | TWIST1/CTHRC1/SPINT2/TG | 15 | 0.153061224489796 |
| GO:0099024 BP | GO:0099024 plasma        | 19/1414 | 136/18903 | 0.006069784 | 0.0248980 | 0.01595514 | PLCG2/GSN/AIF1/MSR1/ITG | 19 | 0.139705882352941 |
| GO:0045744 BP | GO:0045744 negative      | 10/1414 | 54/18903  | 0.006139521 | 0.0251664 | 0.01612711 | PDE4B/ADM/PLEK/ARRB2/CX | 10 | 0.185185185185185 |
| GO:0040036 BP | GO:0040036 regulation of | 8/1414  | 38/18903  | 0.006218751 | 0.0254375 | 0.01630086 | SMOC2/SULF2/FAM20C/FGF2 | 8  | 0.210526315789474 |
| GO:0048821 BP | GO:0048821 erythrocyte   | 8/1414  | 38/18903  | 0.006218751 | 0.0254375 | 0.01630086 | KLF2/CITED2/NCKAP1L/PTB | 8  | 0.210526315789474 |
| GO:0090504 BP | GO:0090504 epiboly       | 8/1414  | 38/18903  | 0.006218751 | 0.0254375 | 0.01630086 | COL5A1/FLNA/PDPN/RHOC/C | 8  | 0.210526315789474 |
| GO:0099173 BP | GO:0099173 postsynapse   | 22/1414 | 166/18903 | 0.006266080 | 0.0256132 | 0.01641342 | PTPRD/ACTG1/ACTB/ACTN1/ | 22 | 0.132530120481928 |
| GO:0002920 BP | GO:0002920 regulation of | 9/1414  | 46/18903  | 0.006311222 | 0.0257436 | 0.01649698 | CFH/A2M/CD55/CD59/PTPRC | 9  | 0.195652173913043 |
| GO:0044788 BP | GO:0044788 modulation by | 9/1414  | 46/18903  | 0.006311222 | 0.0257436 | 0.01649698 | EEA1/HSPA8/CSF1R/APOE/C | 9  | 0.195652173913043 |
| GO:0048701 BP | GO:0048701 embryonic     | 9/1414  | 46/18903  | 0.006311222 | 0.0257436 | 0.01649698 | PDGFRA/TWIST1/SIX1/PRRX | 9  | 0.195652173913043 |
| GO:0001838 BP | GO:0001838 embryonic     | 18/1414 | 127/18903 | 0.006409401 | 0.0261075 | 0.01673021 | TWIST1/SOX4/SIX1/CTHRC1 | 18 | 0.141732283464567 |
| GO:0006911 BP | GO:0006911 phagocytosis, | 18/1414 | 127/18903 | 0.006409401 | 0.0261075 | 0.01673021 | PLCG2/GSN/AIF1/MSR1/ITG | 18 | 0.141732283464567 |
| GO:0032526 BP | GO:0032526 response to   | 16/1414 | 108/18903 | 0.006439578 | 0.0261939 | 0.01678554 | COL1A1/MMP2/AQP1/PDGFRB | 16 | 0.148148148148148 |
| GO:0090398 BP | GO:0090398 cellular      | 16/1414 | 108/18903 | 0.006439578 | 0.0261939 | 0.01678554 | TWIST1/LMNA/PRELP/MAP2K | 16 | 0.148148148148148 |
| GO:0044091 BP | GO:0044091 membrane      | 11/1414 | 63/18903  | 0.006578320 | 0.0266344 | 0.01706786 | MAFB/PTPRD/ANK3/ANXA2/C | 11 | 0.174603174603175 |
| GO:2001244 BP | GO:2001244 positive      | 11/1414 | 63/18903  | 0.006578320 | 0.0266344 | 0.01706786 | UBB/DDIT3/NUPR1/RPS3/CA | 11 | 0.174603174603175 |
| GO:0035296 BP | GO:0035296 regulation of | 20/1414 | 147/18903 | 0.006666086 | 0.0266344 | 0.01706786 | MMP2/COMP/SOD2/KCNMA1/P | 20 | 0.136054421768707 |
| GO:0097746 BP | GO:0097746 blood vessel  | 20/1414 | 147/18903 | 0.006666086 | 0.0266344 | 0.01706786 | MMP2/COMP/SOD2/KCNMA1/P | 20 | 0.136054421768707 |
| GO:0032412 BP | GO:0032412 regulation of | 33/1414 | 281/18903 | 0.006670308 | 0.0266344 | 0.01706786 | VMP1/FHL1/ANK3/NDUFA4/P | 33 | 0.117437722419929 |
| GO:0003174 BP | GO:0003174 mitral valve  | 4/1414  | 11/18903  | 0.006713260 | 0.0266344 | 0.01706786 | TWIST1/SOX4/EFNA1/BMPR2 | 4  | 0.363636363636364 |
| GO:0019065 BP | GO:0019065 receptor-     | 4/1414  | 11/18903  | 0.006713260 | 0.0266344 | 0.01706786 | CTSL/CAV1/EPS15/CAV2    | 4  | 0.363636363636364 |
| GO:0032342 BP | GO:0032342 aldosterone   | 4/1414  | 11/18903  | 0.006713260 | 0.0266344 | 0.01706786 | DKK3/DAB2/BMP2/BMP6     | 4  | 0.363636363636364 |
| GO:0034350 BP | GO:0034350 regulation of | 4/1414  | 11/18903  | 0.006713260 | 0.0266344 | 0.01706786 | CCL2/TREM2/GAS6/PRKCH   | 4  | 0.363636363636364 |
| GO:0042167 BP | GO:0042167 heme          | 4/1414  | 11/18903  | 0.006713260 | 0.0266344 | 0.01706786 | SLCO2B1/HMOX1/BLVRB/BLV | 4  | 0.363636363636364 |
| GO:0042451 BP | GO:0042451 purine        | 4/1414  | 11/18903  | 0.006713260 | 0.0266344 | 0.01706786 | NT5E/PNP/ADK/APRT       | 4  | 0.363636363636364 |
| GO:0042455 BP | GO:0042455 ribonucleosid | 4/1414  | 11/18903  | 0.006713260 | 0.0266344 | 0.01706786 | NT5E/PNP/ADK/APRT       | 4  | 0.363636363636364 |
| GO:0042487 BP | GO:0042487 regulation of | 4/1414  | 11/18903  | 0.006713260 | 0.0266344 | 0.01706786 | RSPO2/BMP2/TNFRSF11B/RU | 4  | 0.363636363636364 |
| GO:0045060 BP | GO:0045060 negative      | 4/1414  | 11/18903  | 0.006713260 | 0.0266344 | 0.01706786 | GLI3/CD74/PTPRC/DOCK2   | 4  | 0.363636363636364 |
| GO:0045628 BP | GO:0045628 regulation of | 4/1414  | 11/18903  | 0.006713260 | 0.0266344 | 0.01706786 | ANXA1/CD86/IL18/BCL6    | 4  | 0.363636363636364 |
| GO:0046129 BP | GO:0046129 purine        | 4/1414  | 11/18903  | 0.006713260 | 0.0266344 | 0.01706786 | NT5E/PNP/ADK/APRT       | 4  | 0.363636363636364 |
| GO:0046149 BP | GO:0046149 pigment       | 4/1414  | 11/18903  | 0.006713260 | 0.0266344 | 0.01706786 | SLCO2B1/HMOX1/BLVRB/BLV | 4  | 0.363636363636364 |
| GO:0048505 BP | GO:0048505 regulation of | 4/1414  | 11/18903  | 0.006713260 | 0.0266344 | 0.01706786 | RBPJ/HES1/SERPINE2/JAG1 | 4  | 0.363636363636364 |
| GO:0048563 BP | GO:0048563 post-         | 4/1414  | 11/18903  | 0.006713260 | 0.0266344 | 0.01706786 | FBN1/EFEMP1/BAX/KDR     | 4  | 0.363636363636364 |
| GO:0060174 BP | GO:0060174 limb bud      | 4/1414  | 11/18903  | 0.006713260 | 0.0266344 | 0.01706786 | SOX4/SEMA3C/COL2A1/FGFR | 4  | 0.363636363636364 |
| GO:0060315 BP | GO:0060315 negative      | 4/1414  | 11/18903  | 0.006713260 | 0.0266344 | 0.01706786 | CALM2/GSTO1/CALM3/CALM1 | 4  | 0.363636363636364 |
| GO:0061314 BP | GO:0061314 Notch         | 4/1414  | 11/18903  | 0.006713260 | 0.0266344 | 0.01706786 | RBPJ/NOTCH2/SNAI1/JAG1  | 4  | 0.363636363636364 |

|               |                          |         |           |             |           |            |                         |                      |
|---------------|--------------------------|---------|-----------|-------------|-----------|------------|-------------------------|----------------------|
| GO:0071394 BP | GO:0071394 cellular      | 4/1414  | 11/18903  | 0.006713260 | 0.0266344 | 0.01706786 | SPP1/NCF1/NCOA4/MSN     | 4 0.363636363636364  |
| GO:0071679 BP | GO:0071679 commissural   | 4/1414  | 11/18903  | 0.006713260 | 0.0266344 | 0.01706786 | VEGFA/NRP1/NFIB/NCAM1   | 4 0.363636363636364  |
| GO:0090084 BP | GO:0090084 negative      | 4/1414  | 11/18903  | 0.006713260 | 0.0266344 | 0.01706786 | DNAJB1/HSPA1A/HSPA1B/DN | 4 0.363636363636364  |
| GO:1901844 BP | GO:1901844 regulation of | 4/1414  | 11/18903  | 0.006713260 | 0.0266344 | 0.01706786 | CALM2/CAV1/CALM3/CALM1  | 4 0.363636363636364  |
| GO:2000727 BP | GO:2000727 positive      | 4/1414  | 11/18903  | 0.006713260 | 0.0266344 | 0.01706786 | TGFB1/ARRB2/MEF2C/EFNB2 | 4 0.363636363636364  |
| GO:0030307 BP | GO:0030307 positive      | 22/1414 | 167/18903 | 0.006721786 | 0.0266344 | 0.01706786 | NTN1/FN1/SDCBP/VEGFA/CX | 22 0.131736526946108 |
| GO:0019885 BP | GO:0019885 antigen       | 5/1414  | 17/18903  | 0.006724660 | 0.0266344 | 0.01706786 | B2M/HLA-B/HLA-E/HLA-    | 5 0.294117647058824  |
| GO:0036005 BP | GO:0036005 response to   | 5/1414  | 17/18903  | 0.006724660 | 0.0266344 | 0.01706786 | SPP1/CSF1R/TREM2/TLR4/B | 5 0.294117647058824  |
| GO:0038065 BP | GO:0038065 collagen-     | 5/1414  | 17/18903  | 0.006724660 | 0.0266344 | 0.01706786 | COL1A1/ITGA11/DDR2/COL4 | 5 0.294117647058824  |
| GO:0042481 BP | GO:0042481 regulation of | 5/1414  | 17/18903  | 0.006724660 | 0.0266344 | 0.01706786 | RSPO2/BMP2/TNFRSF11B/RU | 5 0.294117647058824  |
| GO:0048875 BP | GO:0048875 chemical      | 5/1414  | 17/18903  | 0.006724660 | 0.0266344 | 0.01706786 | VEGFA/CTSH/EPAS1/ADGRF5 | 5 0.294117647058824  |
| GO:0051412 BP | GO:0051412 response to   | 5/1414  | 17/18903  | 0.006724660 | 0.0266344 | 0.01706786 | FOSB/FOS/CCND1/ATP2B1/C | 5 0.294117647058824  |
| GO:0055119 BP | GO:0055119 relaxation of | 5/1414  | 17/18903  | 0.006724660 | 0.0266344 | 0.01706786 | GSN/PDE4B/ATP1B1/SLC8A1 | 5 0.294117647058824  |
| GO:0072109 BP | GO:0072109 glomerular    | 5/1414  | 17/18903  | 0.006724660 | 0.0266344 | 0.01706786 | EGR1/PDGFRB/CFLAR/CD34/ | 5 0.294117647058824  |
| GO:1900034 BP | GO:1900034 regulation of | 5/1414  | 17/18903  | 0.006724660 | 0.0266344 | 0.01706786 | DNAJB1/IER5/MAPKAPK2/DN | 5 0.294117647058824  |
| GO:2000651 BP | GO:2000651 positive      | 5/1414  | 17/18903  | 0.006724660 | 0.0266344 | 0.01706786 | ANK3/GLRX/ATP1B1/ACTN4/ | 5 0.294117647058824  |
| GO:0071214 BP | GO:0071214 cellular      | 38/1414 | 335/18903 | 0.006730536 | 0.0266344 | 0.01706786 | COL1A1/MMP2/EGR1/ZFP36L | 38 0.113432835820896 |
| GO:0104004 BP | GO:0104004 cellular      | 38/1414 | 335/18903 | 0.006730536 | 0.0266344 | 0.01706786 | COL1A1/MMP2/EGR1/ZFP36L | 38 0.113432835820896 |
| GO:0009145 BP | GO:0009145 purine        | 17/1414 | 118/18903 | 0.006735994 | 0.0266380 | 0.01707012 | H19/NDUFB1/ATP5ME/ATP6V | 17 0.144067796610169 |
| GO:0071692 BP | GO:0071692 protein       | 41/1414 | 368/18903 | 0.006812648 | 0.0269228 | 0.01725268 | NBL1/LTBP2/LTBP1/SOX4/C | 41 0.111413043478261 |
| GO:0014855 BP | GO:0014855 striated      | 13/1414 | 81/18903  | 0.006862920 | 0.0271031 | 0.01736822 | FOS/SIX1/RBPJ/RUNX1/RBP | 13 0.160493827160494 |
| GO:0061311 BP | GO:0061311 cell surface  | 7/1414  | 31/18903  | 0.006899740 | 0.0271383 | 0.01739076 | RBPJ/NOTCH2/SNAI1/BMP2/ | 7 0.225806451612903  |
| GO:0071295 BP | GO:0071295 cellular      | 7/1414  | 31/18903  | 0.006899740 | 0.0271383 | 0.01739076 | COL1A1/POSTN/FOLR2/ATP2 | 7 0.225806451612903  |
| GO:0097205 BP | GO:0097205 renal         | 7/1414  | 31/18903  | 0.006899740 | 0.0271383 | 0.01739076 | AQP1/SULF2/CYBA/GAS6/AD | 7 0.225806451612903  |
| GO:0098868 BP | GO:0098868 bone growth   | 7/1414  | 31/18903  | 0.006899740 | 0.0271383 | 0.01739076 | ECM1/COMP/COL27A1/FGFR3 | 7 0.225806451612903  |
| GO:1900027 BP | GO:1900027 regulation of | 7/1414  | 31/18903  | 0.006899740 | 0.0271383 | 0.01739076 | ICAM1/CAV1/EPS8L2/RHOG/ | 7 0.225806451612903  |
| GO:1902042 BP | GO:1902042 negative      | 7/1414  | 31/18903  | 0.006899740 | 0.0271383 | 0.01739076 | CFLAR/ICAM1/PEA15/HMOX1 | 7 0.225806451612903  |
| GO:0048706 BP | GO:0048706 embryonic     | 18/1414 | 128/18903 | 0.006951475 | 0.0273234 | 0.01750935 | COL1A1/PDGFRB/TWIST1/SI | 18 0.140625          |
| GO:0031103 BP | GO:0031103 axon          | 10/1414 | 55/18903  | 0.007012822 | 0.0275459 | 0.01765198 | MMP2/TNC/JUN/FLNA/PTN/A | 10 0.181818181818182 |
| GO:0045927 BP | GO:0045927 positive      | 31/1414 | 261/18903 | 0.007134124 | 0.0280035 | 0.01794522 | RBPJ/NTN1/FN1/FGF2/SDCB | 31 0.118773946360153 |
| GO:0035150 BP | GO:0035150 regulation of | 20/1414 | 148/18903 | 0.007181401 | 0.0281097 | 0.01801321 | MMP2/COMP/SOD2/KCNMA1/P | 20 0.135135135135135 |
| GO:0046546 BP | GO:0046546 development   | 20/1414 | 148/18903 | 0.007181401 | 0.0281097 | 0.01801321 | PDGFRA/PDGFRB/COL9A3/PR | 20 0.135135135135135 |
| GO:0007097 BP | GO:0007097 nuclear       | 6/1414  | 24/18903  | 0.007228621 | 0.0281097 | 0.01801321 | LMNA/NTN1/CDC42/SUN2/SY | 6 0.25               |
| GO:0021884 BP | GO:0021884 forebrain     | 6/1414  | 24/18903  | 0.007228621 | 0.0281097 | 0.01801321 | UBB/NRP2/FGFR2/NDNF/NRP | 6 0.25               |
| GO:0032528 BP | GO:0032528 microvillus   | 6/1414  | 24/18903  | 0.007228621 | 0.0281097 | 0.01801321 | STK26/GLDN/TWF2/EZR/POD | 6 0.25               |
| GO:0035357 BP | GO:0035357 peroxisome    | 6/1414  | 24/18903  | 0.007228621 | 0.0281097 | 0.01801321 | TWIST1/BMP2/FABP5/CITED | 6 0.25               |

|               |                                        |         |           |                         |                        |                        |                                                    |    |                   |
|---------------|----------------------------------------|---------|-----------|-------------------------|------------------------|------------------------|----------------------------------------------------|----|-------------------|
| GO:0036010 BP | GO:0036010 protein                     | 6/1414  | 24/18903  | 0.007228621             | 0.0281097              | 0.01801321             | NRP1/EZR/MSN/ARF6/VPS35                            | 6  | 0.25              |
| GO:0036120 BP | GO:0036120 cellular                    | 6/1414  | 24/18903  | 0.007228621             | 0.0281097              | 0.01801321             | PDGFRB/TLR4/IQGAP1/PDGF                            | 6  | 0.25              |
| GO:0051043 BP | GO:0051043 regulation of               | 6/1414  | 24/18903  | 0.007228621             | 0.0281097              | 0.01801321             | TIMP2/TIMP4/APOE/ADAM9/                            | 6  | 0.25              |
| GO:0060706 BP | GO:0060706 cell                        | 6/1414  | 24/18903  | 0.007228621             | 0.0281097              | 0.01801321             | SNAI1/SPINT2/MDFI/STK4/                            | 6  | 0.25              |
| GO:0060907 BP | GO:0060907 positive                    | 6/1414  | 24/18903  | 0.007228621             | 0.0281097              | 0.01801321             | PLCG2/MAPKAPK2/CD74/LAP                            | 6  | 0.25              |
| GO:0061162 BP | GO:0061162 establishment               | 6/1414  | 24/18903  | 0.007228621             | 0.0281097              | 0.01801321             | CDC42/RHOA/MSN/MAP1B/FA                            | 6  | 0.25              |
| GO:0120255 BP | GO:0120255 olefinic                    | 6/1414  | 24/18903  | 0.007228621             | 0.0281097              | 0.01801321             | EGR1/DKK3/DAB2/BMP2/BMP                            | 6  | 0.25              |
| GO:1904666 BP | GO:1904666 regulation of               | 6/1414  | 24/18903  | 0.007228621             | 0.0281097              | 0.01801321             | UBE2S/RPS20/RPS15/RPS7/                            | 6  | 0.25              |
| GO:0045732 BP | GO:0045732 positive                    | 26/1414 | 209/18903 | 0.007287742             | 0.0282642              | 0.01811228             | DAB2/FOXO1/HSPA1A/HSPA1                            | 26 | 0.124401913875598 |
| GO:0010769 BP | GO:0010769 regulation of               | 15/1414 | 100/18903 | 0.007299421             | 0.0282642              | 0.01811228             | DAB2/PTPRD/FLNA/MELTF/P                            | 15 | 0.15              |
| GO:1990830 BP | GO:1990830 cellular                    | 15/1414 | 100/18903 | 0.007299421             | 0.0282642              | 0.01811228             | SOCS3/PCOLCE2/NRP2/SRM/                            | 15 | 0.15              |
| GO:0030521 BP | GO:0030521 androgen                    | 9/1414  | 47/18903  | 0.007299787             | 0.0282642              | 0.01811228             | FOXP1/DAB2/DNAJA1/PMEPA                            | 9  | 0.191489361702128 |
| GO:0090199 BP | GO:0090199 regulation of               | 9/1414  | 47/18903  | 0.007299787             | 0.0282642              | 0.01811228             | LMNA/PLAUR/PRELI1D1/NOL3                           | 9  | 0.191489361702128 |
| GO:0009595 BP | GO:0009595 detection of                | 8/1414  | 39/18903  | 0.007321677             | 0.0282642              | 0.01811228             | FAP/HLA-                                           | 8  | 0.205128205128205 |
| GO:0030279 BP | GO:0030279 negative                    | 8/1414  | 39/18903  | 0.007321677             | 0.0282642              | 0.01811228             | ECM1/RBPJ/LTBP3/RFLNB/C                            | 8  | 0.205128205128205 |
| GO:0032373 BP | GO:0032373 positive                    | 8/1414  | 39/18903  | 0.007321677             | 0.0282642              | 0.01811228             | ABCA5/NFKBIA/ANXA2/CAV1                            | 8  | 0.205128205128205 |
| GO:0032376 BP | GO:0032376 positive                    | 8/1414  | 39/18903  | 0.007321677             | 0.0282642              | 0.01811228             | ABCA5/NFKBIA/ANXA2/CAV1                            | 8  | 0.205128205128205 |
| GO:0042401 BP | GO:0042401 cellular                    | 8/1414  | 39/18903  | 0.007321677             | 0.0282642              | 0.01811228             | SRM/SAT1/OAZ1/ODC1/SMS/                            | 8  | 0.205128205128205 |
| GO:0071634 BP | GO:0071634 regulation of               | 8/1414  | 39/18903  | 0.007321677             | 0.0282642              | 0.01811228             | LTBP1/LUM/FN1/PTGS2/TYR                            | 8  | 0.205128205128205 |
| GO:0032409 BP | GO:0032409 regulation of               | 37/1414 | 326/18903 | 0.007356153             | 0.0283786              | 0.01818553             | TWIST1/ACTB/VMP1/FHL1/A                            | 37 | 0.113496932515337 |
| GO:0048593 BP | GO:0048593 camera-type                 | 18/1414 | 129/18903 | 0.007530091             | 0.0290304              | 0.01860323             | THY1/AQP1/TWIST1/ZEB1/N                            | 18 | 0.13953488372093  |
| GO:0051896 BP | GO:0051896 regulation of               | 24/1414 | 189/18903 | 0.007551871             | 0.0290951              | 0.01864471             | CHI3L1/H19/DDIT3/FGFR1/                            | 24 | 0.126984126984127 |
| GO:0002706 BP | GO:0002706 regulation of               | 23/1414 | 179/18903 | 0.007648646             | 0.0294485              | 0.01887117             | CADM1/LAG3/CD55/TGFB1/H                            | 23 | 0.128491620111732 |
| GO:0050852 BP | GO:0050852 T cell                      | 19/1414 | 139/18903 | 0.007660589             | 0.0294750              | 0.01888817             | THY1/PLCG2/PDE4B/RPS3/N                            | 19 | 0.136690647482014 |
| GO:0050851 BP | GO:0050851 antigen                     | 30/1414 | 252/18903 | 0.007779386             | 0.0299124              | 0.01916844             | THY1/FOXP1/PLCG2/PDE4B/                            | 30 | 0.119047619047619 |
| GO:0072594 BP | GO:0072594 establishment<br>of protein | 48/1414 | 449/18903 | 0.007862419<br>53957058 | 0.0302117<br>873348585 | 0.01936027<br>44504647 | LMNA/FLNA/LAMP2/GLI3/HS<br>PA8/DDIT3/DNAJA1/NFKBIA | 48 | 0.106904231625835 |
| GO:1990823 BP | GO:1990823 response to                 | 15/1414 | 101/18903 | 0.007996332             | 0.0307061              | 0.01967705             | SOCS3/PCOLCE2/NRP2/SRM/                            | 15 | 0.148514851485149 |
| GO:0001843 BP | GO:0001843 neural tube                 | 14/1414 | 92/18903  | 0.008254077             | 0.0316236              | 0.02026500             | TWIST1/CTHRC1/SPINT2/TG                            | 14 | 0.152173913043478 |
| GO:0002028 BP | GO:0002028 regulation of               | 14/1414 | 92/18903  | 0.008254077             | 0.0316236              | 0.02026500             | ANK3/FXYD1/GLRX/SERPINE                            | 14 | 0.152173913043478 |
| GO:0002862 BP | GO:0002862 negative                    | 7/1414  | 32/18903  | 0.008273211             | 0.0316236              | 0.02026500             | PSMB4/HLA-                                         | 7  | 0.21875           |
| GO:0010743 BP | GO:0010743 regulation of               | 7/1414  | 32/18903  | 0.008273211             | 0.0316236              | 0.02026500             | ABCA5/PLA2G2A/NFKBIA/MS                            | 7  | 0.21875           |
| GO:0045671 BP | GO:0045671 negative                    | 7/1414  | 32/18903  | 0.008273211             | 0.0316236              | 0.02026500             | MAFB/FBN1/PIK3R1/TNFRSF                            | 7  | 0.21875           |
| GO:0061037 BP | GO:0061037 negative                    | 7/1414  | 32/18903  | 0.008273211             | 0.0316236              | 0.02026500             | CTSK/GLI3/EFEMP1/LTBP3/                            | 7  | 0.21875           |
| GO:0061099 BP | GO:0061099 negative                    | 7/1414  | 32/18903  | 0.008273211             | 0.0316236              | 0.02026500             | THY1/SH3BP5/GPRC5A/CAV1                            | 7  | 0.21875           |
| GO:0051147 BP | GO:0051147 regulation of               | 21/1414 | 160/18903 | 0.008304375             | 0.0317219              | 0.02032801             | FOXP1/ZEB1/PIEZO1/SOD2/                            | 21 | 0.13125           |

|               |                                      |         |           |                         |                        |                        |                                                    |    |                   |
|---------------|--------------------------------------|---------|-----------|-------------------------|------------------------|------------------------|----------------------------------------------------|----|-------------------|
| GO:0032613 BP | GO:0032613 interleukin-              | 11/1414 | 65/18903  | 0.008343680             | 0.0318304              | 0.02039751             | PLCG2/HSPD1/HLA-                                   | 11 | 0.169230769230769 |
| GO:0032653 BP | GO:0032653 regulation of             | 11/1414 | 65/18903  | 0.008343680             | 0.0318304              | 0.02039751             | PLCG2/HSPD1/HLA-                                   | 11 | 0.169230769230769 |
| GO:0032611 BP | GO:0032611 interleukin-1             | 16/1414 | 111/18903 | 0.008368258             | 0.0318824              | 0.02043087             | EGR1/FOXP1/HSPB1/SERPIN                            | 16 | 0.144144144144144 |
| GO:0032651 BP | GO:0032651 regulation of             | 16/1414 | 111/18903 | 0.008368258             | 0.0318824              | 0.02043087             | EGR1/FOXP1/HSPB1/SERPIN                            | 16 | 0.144144144144144 |
| GO:0003197 BP | GO:0003197 endocardial               | 9/1414  | 48/18903  | 0.008402365             | 0.0319498              | 0.02047402             | TWIST1/RBPJ/SNAI1/BMP2/                            | 9  | 0.1875            |
| GO:0045581 BP | GO:0045581 negative                  | 9/1414  | 48/18903  | 0.008402365             | 0.0319498              | 0.02047402             | RUNX1/GLI3/LAG3/ANXA1/C                            | 9  | 0.1875            |
| GO:0046850 BP | GO:0046850 regulation of             | 9/1414  | 48/18903  | 0.008402365             | 0.0319498              | 0.02047402             | LTBP3/TF/SPPI1/TNFRSF11B                           | 9  | 0.1875            |
| GO:0042310 BP | GO:0042310 vasoconstrict             | 13/1414 | 83/18903  | 0.008424875             | 0.0320145              | 0.02051550             | MMP2/COMP/PTGS2/CAV1/AD                            | 13 | 0.156626506024096 |
| GO:0032732 BP | GO:0032732 positive                  | 12/1414 | 74/18903  | 0.008471153             | 0.0321484              | 0.02060135             | EGR1/S100A13/SAA1/HSPB1                            | 12 | 0.162162162162162 |
| GO:0045123 BP | GO:0045123 cellular                  | 12/1414 | 74/18903  | 0.008471153             | 0.0321484              | 0.02060135             | THY1/CD99/VCAM1/ICAM1/C                            | 12 | 0.162162162162162 |
| GO:1903829 BP | GO:1903829 positive<br>regulation of | 48/1414 | 451/18903 | 0.008514165<br>11816219 | 0.0322907<br>185528219 | 0.02069249<br>21871151 | EPB41L2/SOX4/FLNA/GLI3/<br>ANK3/RBP4/PIK3R1/RAN/SQ | 48 | 0.106430155210643 |
| GO:0009309 BP | GO:0009309 amine                     | 8/1414  | 40/18903  | 0.008565680             | 0.0324649              | 0.02080416             | SRM/SAT1/OAZ1/ODC1/SMS/                            | 8  | 0.2               |
| GO:0008217 BP | GO:0008217 regulation of             | 24/1414 | 191/18903 | 0.008573012             | 0.0324716              | 0.02080845             | COL1A2/TPM1/SOD2/PTGS2/                            | 24 | 0.12565445026178  |
| GO:0032355 BP | GO:0032355 response to               | 17/1414 | 121/18903 | 0.008632265             | 0.0326748              | 0.02093867             | COL1A1/MMP2/PDGFRB/CRYA                            | 17 | 0.140495867768595 |
| GO:0001946 BP | GO:0001946 lymphangiogen             | 5/1414  | 18/18903  | 0.008746374             | 0.0327666              | 0.02099744             | PDPN/CLEC14A/SOX18/TIE1                            | 5  | 0.277777777777778 |
| GO:0002076 BP | GO:0002076 osteoblast                | 5/1414  | 18/18903  | 0.008746374             | 0.0327666              | 0.02099744             | JUND/BGLAP/SATB2/RUNX2/                            | 5  | 0.277777777777778 |
| GO:0006595 BP | GO:0006595 polyamine                 | 5/1414  | 18/18903  | 0.008746374             | 0.0327666              | 0.02099744             | SRM/SAT1/OAZ1/ODC1/SMS                             | 5  | 0.277777777777778 |
| GO:0008356 BP | GO:0008356 asymmetric                | 5/1414  | 18/18903  | 0.008746374             | 0.0327666              | 0.02099744             | SOX5/ZBTB16/ACTR2/ACTR3                            | 5  | 0.277777777777778 |
| GO:0036499 BP | GO:0036499 PERK-mediated             | 5/1414  | 18/18903  | 0.008746374             | 0.0327666              | 0.02099744             | DDIT3/PPP1R15A/ATF4/HSP                            | 5  | 0.277777777777778 |
| GO:0051770 BP | GO:0051770 positive                  | 5/1414  | 18/18903  | 0.008746374             | 0.0327666              | 0.02099744             | MAP2K6/NAMPT/CCL2/TLR4/                            | 5  | 0.277777777777778 |
| GO:0051917 BP | GO:0051917 regulation of             | 5/1414  | 18/18903  | 0.008746374             | 0.0327666              | 0.02099744             | FAP/PLAUR/THBS1/PLAT/TH                            | 5  | 0.277777777777778 |
| GO:0060263 BP | GO:0060263 regulation of             | 5/1414  | 18/18903  | 0.008746374             | 0.0327666              | 0.02099744             | CLEC7A/NCF1/GRN/RAC1/RP                            | 5  | 0.277777777777778 |
| GO:0060391 BP | GO:0060391 positive                  | 5/1414  | 18/18903  | 0.008746374             | 0.0327666              | 0.02099744             | DAB2/BMP2/TGFB1/BMP6/BM                            | 5  | 0.277777777777778 |
| GO:0060602 BP | GO:0060602 branch                    | 5/1414  | 18/18903  | 0.008746374             | 0.0327666              | 0.02099744             | SIX1/SPRY2/FGF1/FGFR2/S                            | 5  | 0.277777777777778 |
| GO:0060644 BP | GO:0060644 mammary gland             | 5/1414  | 18/18903  | 0.008746374             | 0.0327666              | 0.02099744             | LBH/FGF2/CEBPB/ID2/MGMT                            | 5  | 0.277777777777778 |
| GO:0072567 BP | GO:0072567 chemokine (C-             | 5/1414  | 18/18903  | 0.008746374             | 0.0327666              | 0.02099744             | FOXP1/KLF4/CD74/MBP/TLR                            | 5  | 0.277777777777778 |
| GO:0072673 BP | GO:0072673 lamellipodium             | 5/1414  | 18/18903  | 0.008746374             | 0.0327666              | 0.02099744             | PDPN/CD44/PLEKH01/SNX2/                            | 5  | 0.277777777777778 |
| GO:0150079 BP | GO:0150079 negative                  | 5/1414  | 18/18903  | 0.008746374             | 0.0327666              | 0.02099744             | NR1D1/PTPRC/TREM2/GRN/C                            | 5  | 0.277777777777778 |
| GO:1902683 BP | GO:1902683 regulation of             | 5/1414  | 18/18903  | 0.008746374             | 0.0327666              | 0.02099744             | GPC6/TYROBP/ADAM10/STX7                            | 5  | 0.277777777777778 |
| GO:2000341 BP | GO:2000341 regulation of             | 5/1414  | 18/18903  | 0.008746374             | 0.0327666              | 0.02099744             | FOXP1/KLF4/CD74/MBP/TLR                            | 5  | 0.277777777777778 |
| GO:0021854 BP | GO:0021854 hypothalamus              | 6/1414  | 25/18903  | 0.008920725             | 0.0332277              | 0.02129293             | UBB/NRP2/NDNF/NRP1/BAX/                            | 6  | 0.24              |
| GO:0043567 BP | GO:0043567 regulation of             | 6/1414  | 25/18903  | 0.008920725             | 0.0332277              | 0.02129293             | IGFBP4/CILP/IGFBP6/BMP2                            | 6  | 0.24              |
| GO:0045649 BP | GO:0045649 regulation of             | 6/1414  | 25/18903  | 0.008920725             | 0.0332277              | 0.02129293             | INHBA/TGFB1/ID2/C1QC/HC                            | 6  | 0.24              |
| GO:0050927 BP | GO:0050927 positive                  | 6/1414  | 25/18903  | 0.008920725             | 0.0332277              | 0.02129293             | VEGFA/CXCL8/PGF/S1PR1/K                            | 6  | 0.24              |
| GO:0061339 BP | GO:0061339 establishment             | 6/1414  | 25/18903  | 0.008920725             | 0.0332277              | 0.02129293             | CDC42/RHOA/MSN/MAP1B/FA                            | 6  | 0.24              |

|               |                          |         |           |             |           |            |                         |    |                    |
|---------------|--------------------------|---------|-----------|-------------|-----------|------------|-------------------------|----|--------------------|
| GO:0071450 BP | GO:0071450 cellular      | 6/1414  | 25/18903  | 0.008920725 | 0.0332277 | 0.02129293 | H19/SOD2/PRDX1/SOD3/GLR | 6  | 0.24               |
| GO:0071451 BP | GO:0071451 cellular      | 6/1414  | 25/18903  | 0.008920725 | 0.0332277 | 0.02129293 | H19/SOD2/PRDX1/SOD3/GLR | 6  | 0.24               |
| GO:0090023 BP | GO:0090023 positive      | 6/1414  | 25/18903  | 0.008920725 | 0.0332277 | 0.02129293 | CD74/C3AR1/CXCL8/C5AR1/ | 6  | 0.24               |
| GO:2000679 BP | GO:2000679 positive      | 6/1414  | 25/18903  | 0.008920725 | 0.0332277 | 0.02129293 | TWIST1/TGFB1/GTF2B/KLF4 | 6  | 0.24               |
| GO:0090175 BP | GO:0090175 regulation of | 10/1414 | 57/18903  | 0.009044867 | 0.0336686 | 0.02157547 | DAB2/CTHRC1/GPC6/MAGI2/ | 10 | 0.175438596491228  |
| GO:0045666 BP | GO:0045666 positive      | 14/1414 | 93/18903  | 0.009066904 | 0.0337076 | 0.02160046 | NBL1/TCF4/ZEB1/CDON/FGF | 14 | 0.150537634408602  |
| GO:0060606 BP | GO:0060606 tube closure  | 14/1414 | 93/18903  | 0.009066904 | 0.0337076 | 0.02160046 | TWIST1/CTHRC1/SPINT2/TG | 14 | 0.150537634408602  |
| GO:0043500 BP | GO:0043500 muscle        | 17/1414 | 122/18903 | 0.009351614 | 0.0346698 | 0.02221706 | FOXP1/LMNA/FOXO1/GSN/CF | 17 | 0.139344262295082  |
| GO:0071479 BP | GO:0071479 cellular      | 12/1414 | 75/18903  | 0.009417165 | 0.0346698 | 0.02221706 | EGR1/CRYAB/CDKN1A/HSPA5 | 12 | 0.16               |
| GO:0007254 BP | GO:0007254 JNK cascade   | 22/1414 | 172/18903 | 0.009425726 | 0.0346698 | 0.02221706 | GADD45B/GADD45G/DNAJA1/ | 22 | 0.127906976744186  |
| GO:0001553 BP | GO:0001553 luteinization | 4/1414  | 12/18903  | 0.009480262 | 0.0346698 | 0.02221706 | MMP2/PDGFR/A2M/INHBA    | 4  | 0.3333333333333333 |
| GO:0001886 BP | GO:0001886 endothelial   | 4/1414  | 12/18903  | 0.009480262 | 0.0346698 | 0.02221706 | COL15A1/COL18A1/NOTCH4/ | 4  | 0.3333333333333333 |
| GO:0002424 BP | GO:0002424 T cell        | 4/1414  | 12/18903  | 0.009480262 | 0.0346698 | 0.02221706 | HSPD1/HLA-DRB1/AHR/HLA- | 4  | 0.3333333333333333 |
| GO:0006705 BP | GO:0006705 mineralocorti | 4/1414  | 12/18903  | 0.009480262 | 0.0346698 | 0.02221706 | DKK3/DAB2/BMP2/BMP6     | 4  | 0.3333333333333333 |
| GO:0014745 BP | GO:0014745 negative      | 4/1414  | 12/18903  | 0.009480262 | 0.0346698 | 0.02221706 | LMNA/FOXO1/NOL3/IGFBP5  | 4  | 0.3333333333333333 |
| GO:0014889 BP | GO:0014889 muscle        | 4/1414  | 12/18903  | 0.009480262 | 0.0346698 | 0.02221706 | GSN/CFLAR/NOL3/GATM     | 4  | 0.3333333333333333 |
| GO:0031953 BP | GO:0031953 negative      | 4/1414  | 12/18903  | 0.009480262 | 0.0346698 | 0.02221706 | JUN/CAV1/PTPRC/ENG      | 4  | 0.3333333333333333 |
| GO:0032817 BP | GO:0032817 regulation of | 4/1414  | 12/18903  | 0.009480262 | 0.0346698 | 0.02221706 | FCGR3A/IL18/HLA-        | 4  | 0.3333333333333333 |
| GO:0032908 BP | GO:0032908 regulation of | 4/1414  | 12/18903  | 0.009480262 | 0.0346698 | 0.02221706 | LUM/TYROBP/ATP6AP2/THBS | 4  | 0.3333333333333333 |
| GO:0034135 BP | GO:0034135 regulation of | 4/1414  | 12/18903  | 0.009480262 | 0.0346698 | 0.02221706 | LYN/TREM2/CYBA/TNFAIP3  | 4  | 0.3333333333333333 |
| GO:0034145 BP | GO:0034145 positive      | 4/1414  | 12/18903  | 0.009480262 | 0.0346698 | 0.02221706 | PELI1/CD14/NINJ1/PTPN22 | 4  | 0.3333333333333333 |
| GO:0038063 BP | GO:0038063 collagen-     | 4/1414  | 12/18903  | 0.009480262 | 0.0346698 | 0.02221706 | COL1A1/DDR2/COL4A1/COL4 | 4  | 0.3333333333333333 |
| GO:0040034 BP | GO:0040034 regulation of | 4/1414  | 12/18903  | 0.009480262 | 0.0346698 | 0.02221706 | RBPJ/HES1/SERPINE2/JAG1 | 4  | 0.3333333333333333 |
| GO:0042447 BP | GO:0042447 hormone       | 4/1414  | 12/18903  | 0.009480262 | 0.0346698 | 0.02221706 | DI02/SPP1/HSD17B11/ECE1 | 4  | 0.3333333333333333 |
| GO:0043380 BP | GO:0043380 regulation of | 4/1414  | 12/18903  | 0.009480262 | 0.0346698 | 0.02221706 | HLA-DRB1/HLA-           | 4  | 0.3333333333333333 |
| GO:0043383 BP | GO:0043383 negative T    | 4/1414  | 12/18903  | 0.009480262 | 0.0346698 | 0.02221706 | GLI3/CD74/PTPRC/DOCK2   | 4  | 0.3333333333333333 |
| GO:0071472 BP | GO:0071472 cellular      | 4/1414  | 12/18903  | 0.009480262 | 0.0346698 | 0.02221706 | ZFP36L1/AQP1/TRPV4/FBP1 | 4  | 0.3333333333333333 |
| GO:0072110 BP | GO:0072110 glomerular    | 4/1414  | 12/18903  | 0.009480262 | 0.0346698 | 0.02221706 | EGR1/PDGFRB/CFLAR/PDGFB | 4  | 0.3333333333333333 |
| GO:0099010 BP | GO:0099010 modification  | 4/1414  | 12/18903  | 0.009480262 | 0.0346698 | 0.02221706 | CTTNBP2/PFN1/CYFIP1/RHO | 4  | 0.3333333333333333 |
| GO:1900152 BP | GO:1900152 negative      | 4/1414  | 12/18903  | 0.009480262 | 0.0346698 | 0.02221706 | TOB1/PABPC1/YBX1/HNRNPU | 4  | 0.3333333333333333 |
| GO:1900272 BP | GO:1900272 negative      | 4/1414  | 12/18903  | 0.009480262 | 0.0346698 | 0.02221706 | PTN/TYROBP/APOE/APP     | 4  | 0.3333333333333333 |
| GO:1902950 BP | GO:1902950 regulation of | 4/1414  | 12/18903  | 0.009480262 | 0.0346698 | 0.02221706 | FCGR2B/APOE/VPS35/FYN   | 4  | 0.3333333333333333 |
| GO:1905245 BP | GO:1905245 regulation of | 4/1414  | 12/18903  | 0.009480262 | 0.0346698 | 0.02221706 | LYN/GRN/PICALM/EFNA1    | 4  | 0.3333333333333333 |
| GO:0042552 BP | GO:0042552 myelination   | 19/1414 | 142/18903 | 0.009573129 | 0.0349875 | 0.02242064 | ID4/TSPAN2/PTN/NDRG1/TY | 19 | 0.133802816901408  |
| GO:0070509 BP | GO:0070509 calcium ion   | 9/1414  | 49/18903  | 0.009626867 | 0.0351178 | 0.02250420 | PDGFRB/HES1/TRPV4/CCL3/ | 9  | 0.183673469387755  |
| GO:0099054 BP | GO:0099054 presynapse    | 9/1414  | 49/18903  | 0.009626867 | 0.0351178 | 0.02250420 | PTPRD/FARP1/GPC6/SDCBP/ | 9  | 0.183673469387755  |

|               |                          |         |           |             |           |            |                         |    |                   |
|---------------|--------------------------|---------|-----------|-------------|-----------|------------|-------------------------|----|-------------------|
| GO:1903426 BP | GO:1903426 regulation of | 9/1414  | 49/18903  | 0.009626867 | 0.0351178 | 0.02250420 | CCN6/H19/PLCG2/SOD2/CFL | 9  | 0.183673469387755 |
| GO:0009895 BP | GO:0009895 negative      | 37/1414 | 332/18903 | 0.009739775 | 0.0355075 | 0.02275391 | FUS/TIMP2/FLNA/TIMP4/ZF | 37 | 0.11144578313253  |
| GO:0001782 BP | GO:0001782 B cell        | 7/1414  | 33/18903  | 0.009837599 | 0.0356193 | 0.02282552 | CD74/LYN/NCKAP1L/MEF2C/ | 7  | 0.212121212121212 |
| GO:0002431 BP | GO:0002431 Fc receptor   | 7/1414  | 33/18903  | 0.009837599 | 0.0356193 | 0.02282552 | RABGEF1/FCER1G/PTPRC/FC | 7  | 0.212121212121212 |
| GO:0007035 BP | GO:0007035 vacuolar      | 7/1414  | 33/18903  | 0.009837599 | 0.0356193 | 0.02282552 | ATP6VOC/ATP6VOB/GRN/PPT | 7  | 0.212121212121212 |
| GO:0038094 BP | GO:0038094 Fc-gamma      | 7/1414  | 33/18903  | 0.009837599 | 0.0356193 | 0.02282552 | FCER1G/PTPRC/FCGR3A/FCG | 7  | 0.212121212121212 |
| GO:0045577 BP | GO:0045577 regulation of | 7/1414  | 33/18903  | 0.009837599 | 0.0356193 | 0.02282552 | ZFP36L1/INHBA/XBP1/ZFP3 | 7  | 0.212121212121212 |
| GO:0048799 BP | GO:0048799 animal organ  | 7/1414  | 33/18903  | 0.009837599 | 0.0356193 | 0.02282552 | ZBTB16/XYL1/BMP2/RFLNB  | 7  | 0.212121212121212 |
| GO:0051497 BP | GO:0051497 negative      | 7/1414  | 33/18903  | 0.009837599 | 0.0356193 | 0.02282552 | PIK3R1/PFN1/PAK2/TJP1/S | 7  | 0.212121212121212 |
| GO:0060351 BP | GO:0060351 cartilage     | 7/1414  | 33/18903  | 0.009837599 | 0.0356193 | 0.02282552 | COL1A1/SERPINH1/COMP/CO | 7  | 0.212121212121212 |
| GO:0090169 BP | GO:0090169 regulation of | 7/1414  | 33/18903  | 0.009837599 | 0.0356193 | 0.02282552 | HSPA1A/HSPA1B/CHMP4B/NU | 7  | 0.212121212121212 |
| GO:0090279 BP | GO:0090279 regulation of | 7/1414  | 33/18903  | 0.009837599 | 0.0356193 | 0.02282552 | PDGFRB/HES1/CCL3/CCL2/S | 7  | 0.212121212121212 |
| GO:1902253 BP | GO:1902253 regulation of | 7/1414  | 33/18903  | 0.009837599 | 0.0356193 | 0.02282552 | UBB/CD44/PTTG1IP/CD74/R | 7  | 0.212121212121212 |
| GO:0007219 BP | GO:0007219 Notch         | 23/1414 | 183/18903 | 0.009896824 | 0.0358115 | 0.02294869 | POSTN/SIX1/RBPJ/NOTCH2/ | 23 | 0.12568306010929  |
| GO:0048704 BP | GO:0048704 embryonic     | 14/1414 | 94/18903  | 0.009941488 | 0.0359328 | 0.02302646 | PDGFRA/TWIST1/SIX1/PRRX | 14 | 0.148936170212766 |
| GO:0006040 BP | GO:0006040 amino sugar   | 8/1414  | 41/18903  | 0.009961169 | 0.0359328 | 0.02302646 | CHI3L1/CHST3/CSGALNACT1 | 8  | 0.195121951219512 |
| GO:0032733 BP | GO:0032733 positive      | 8/1414  | 41/18903  | 0.009961169 | 0.0359328 | 0.02302646 | PLCG2/HSPD1/CLEC7A/CD83 | 8  | 0.195121951219512 |
| GO:0072210 BP | GO:0072210 metanephric   | 8/1414  | 41/18903  | 0.009961169 | 0.0359328 | 0.02302646 | EGR1/PDGFRB/AQP1/PDGFRB | 8  | 0.195121951219512 |
| GO:0072595 BP | GO:0072595 maintenance   | 8/1414  | 41/18903  | 0.009961169 | 0.0359328 | 0.02302646 | TXN/INSIG1/HSPA5/SP100/ | 8  | 0.195121951219512 |
| GO:0006413 BP | GO:0006413 translational | 17/1414 | 123/18903 | 0.010117959 | 0.0364759 | 0.02337445 | RPS3/EIF1/PPP1R15A/EIF1 | 17 | 0.138211382113821 |
| GO:0015980 BP | GO:0015980 energy        | 37/1414 | 333/18903 | 0.010193128 | 0.0367242 | 0.02353356 | NDUFA4/NDUFB1/ATP5ME/UQ | 37 | 0.111111111111111 |
| GO:0033619 BP | GO:0033619 membrane      | 10/1414 | 58/18903  | 0.010216063 | 0.0367841 | 0.02357195 | TIMP2/TIMP4/TGFB1/CTSH/ | 10 | 0.172413793103448 |
| GO:0045727 BP | GO:0045727 positive      | 19/1414 | 143/18903 | 0.010289591 | 0.0370260 | 0.02372696 | SOX4/LARP6/RPS4X/PPP1R1 | 19 | 0.132867132867133 |
| GO:0045685 BP | GO:0045685 regulation of | 12/1414 | 76/18903  | 0.010443221 | 0.0375325 | 0.02405154 | ID4/HES1/PTN/NR1D1/SERP | 12 | 0.157894736842105 |
| GO:0060420 BP | GO:0060420 regulation of | 12/1414 | 76/18903  | 0.010443221 | 0.0375325 | 0.02405154 | FOXP1/RBPJ/RUNX1/RBP4/F | 12 | 0.157894736842105 |
| GO:1904377 BP | GO:1904377 positive      | 11/1414 | 67/18903  | 0.010455587 | 0.0375538 | 0.02406520 | EPB41L2/PIK3R1/SQSTM1/T | 11 | 0.164179104477612 |
| GO:0016197 BP | GO:0016197 endosomal     | 29/1414 | 247/18903 | 0.010527615 | 0.0377892 | 0.02421607 | EEA1/SQSTM1/CHMP4B/GOLT | 29 | 0.117408906882591 |
| GO:0002824 BP | GO:0002824 positive      | 16/1414 | 114/18903 | 0.010732192 | 0.0384999 | 0.02467146 | CD55/TGFB1/HSPD1/NFKBIZ | 16 | 0.140350877192982 |
| GO:0010259 BP | GO:0010259 multicellular | 6/1414  | 26/18903  | 0.010878100 | 0.0388560 | 0.02489969 | COMP/CRYAB/INHBA/GNA13/ | 6  | 0.230769230769231 |
| GO:0010882 BP | GO:0010882 regulation of | 6/1414  | 26/18903  | 0.010878100 | 0.0388560 | 0.02489969 | CALM2/GSTO1/ATP1B1/SLC8 | 6  | 0.230769230769231 |
| GO:0010954 BP | GO:0010954 positive      | 6/1414  | 26/18903  | 0.010878100 | 0.0388560 | 0.02489969 | MELTF/GSN/ANXA2/ENO1/S1 | 6  | 0.230769230769231 |
| GO:0043931 BP | GO:0043931 ossification  | 6/1414  | 26/18903  | 0.010878100 | 0.0388560 | 0.02489969 | ZBTB16/XYL1/BMP2/RFLNB  | 6  | 0.230769230769231 |
| GO:0046639 BP | GO:0046639 negative      | 6/1414  | 26/18903  | 0.010878100 | 0.0388560 | 0.02489969 | RUNX1/GLI3/ANXA1/BCL6/S | 6  | 0.230769230769231 |
| GO:0050857 BP | GO:0050857 positive      | 6/1414  | 26/18903  | 0.010878100 | 0.0388560 | 0.02489969 | FOXP1/RPS3/PTPRC/CMTM3/ | 6  | 0.230769230769231 |
| GO:0050926 BP | GO:0050926 regulation of | 6/1414  | 26/18903  | 0.010878100 | 0.0388560 | 0.02489969 | VEGFA/CXCL8/PGF/S1PR1/K | 6  | 0.230769230769231 |
| GO:0051209 BP | GO:0051209 release of    | 17/1414 | 124/18903 | 0.010933367 | 0.0390295 | 0.02501087 | THY1/FLNA/PLCG2/DDIT3/F | 17 | 0.137096774193548 |

|               |                          |         |           |             |           |            |                         |    |                    |
|---------------|--------------------------|---------|-----------|-------------|-----------|------------|-------------------------|----|--------------------|
| GO:0060043 BP | GO:0060043 regulation of | 9/1414  | 50/18903  | 0.010981242 | 0.0391765 | 0.02510503 | RBPJ/RUNX1/RBP4/FGF2/FG | 9  | 0.18               |
| GO:0030048 BP | GO:0030048 actin         | 18/1414 | 134/18903 | 0.011032904 | 0.0393367 | 0.02520772 | GJA1/FRMD6/WIPF1/TPM1/F | 18 | 0.134328358208955  |
| GO:0007272 BP | GO:0007272 ensheathment  | 19/1414 | 144/18903 | 0.011048276 | 0.0393434 | 0.02521202 | ID4/TSPAN2/PTN/NDRG1/TY | 19 | 0.1319444444444444 |
| GO:0008366 BP | GO:0008366 axon          | 19/1414 | 144/18903 | 0.011048276 | 0.0393434 | 0.02521202 | ID4/TSPAN2/PTN/NDRG1/TY | 19 | 0.1319444444444444 |
| GO:0007213 BP | GO:0007213 G protein-    | 5/1414  | 19/18903  | 0.011151784 | 0.0396153 | 0.02538623 | RGS10/GNAQ/GNAI2/PLCB1/ | 5  | 0.263157894736842  |
| GO:0010544 BP | GO:0010544 negative      | 5/1414  | 19/18903  | 0.011151784 | 0.0396153 | 0.02538623 | PDGFRA/SERPINE2/APOE/PD | 5  | 0.263157894736842  |
| GO:0099563 BP | GO:0099563 modification  | 5/1414  | 19/18903  | 0.011151784 | 0.0396153 | 0.02538623 | CTTNBP2/PFN1/CYFIP1/CDC | 5  | 0.263157894736842  |
| GO:2000136 BP | GO:2000136 regulation of | 5/1414  | 19/18903  | 0.011151784 | 0.0396153 | 0.02538623 | SIX1/RBPJ/HES1/GNG5/BMP | 5  | 0.263157894736842  |
| GO:1903050 BP | GO:1903050 regulation of | 27/1414 | 227/18903 | 0.011267978 | 0.0400037 | 0.02563513 | DAB2/HSPA1A/UBB/HSPA1B/ | 27 | 0.118942731277533  |
| GO:0032456 BP | GO:0032456 endocytic     | 13/1414 | 86/18903  | 0.011276448 | 0.0400094 | 0.02563879 | RAB13/ARL4C/CMTM6/RAB8B | 13 | 0.151162790697674  |
| GO:0007566 BP | GO:0007566 embryo        | 10/1414 | 59/18903  | 0.011499093 | 0.0407498 | 0.02611324 | MMP2/GJA1/VMP1/IGFBP7/S | 10 | 0.169491525423729  |
| GO:0043903 BP | GO:0043903 regulation of | 10/1414 | 59/18903  | 0.011499093 | 0.0407498 | 0.02611324 | LGALS1/IFITM1/GSN/IFITM | 10 | 0.169491525423729  |
| GO:0045022 BP | GO:0045022 early         | 8/1414  | 42/18903  | 0.011518526 | 0.0407939 | 0.02614149 | DAB2/FLNA/EEA1/EZR/MSN/ | 8  | 0.19047619047619   |
| GO:0032729 BP | GO:0032729 positive      | 12/1414 | 77/18903  | 0.011553580 | 0.0408684 | 0.02618924 | PDE4B/HSPD1/HLA-        | 12 | 0.155844155844156  |
| GO:0045824 BP | GO:0045824 negative      | 12/1414 | 77/18903  | 0.011553580 | 0.0408684 | 0.02618924 | A2M/ARRB2/VSIG4/SAMHD1/ | 12 | 0.155844155844156  |
| GO:0000289 BP | GO:0000289 nuclear-      | 7/1414  | 34/18903  | 0.011607064 | 0.0409830 | 0.02626270 | TNRC6A/ZFP36/BTG2/TOB1/ | 7  | 0.205882352941176  |
| GO:0035308 BP | GO:0035308 negative      | 7/1414  | 34/18903  | 0.011607064 | 0.0409830 | 0.02626270 | PPP1R15A/NCKAP1L/YWHAB/ | 7  | 0.205882352941176  |
| GO:0070570 BP | GO:0070570 regulation of | 7/1414  | 34/18903  | 0.011607064 | 0.0409830 | 0.02626270 | THY1/PRRX1/FLNA/PTN/SPP | 7  | 0.205882352941176  |
| GO:0048640 BP | GO:0048640 negative      | 16/1414 | 115/18903 | 0.011627664 | 0.0410309 | 0.02629339 | FOXP1/SEMA3C/NTN1/RBP4/ | 16 | 0.139130434782609  |
| GO:0000288 BP | GO:0000288 nuclear-      | 11/1414 | 68/18903  | 0.011654228 | 0.0410501 | 0.02630572 | ZFP36L1/TNRC6A/ZFP36/BT | 11 | 0.161764705882353  |
| GO:0030239 BP | GO:0030239 myofibril     | 11/1414 | 68/18903  | 0.011654228 | 0.0410501 | 0.02630572 | PDGFRA/PDGFRA/MYL9/ACTG | 11 | 0.161764705882353  |
| GO:0042093 BP | GO:0042093 T-helper cell | 11/1414 | 68/18903  | 0.011654228 | 0.0410501 | 0.02630572 | FOXP1/JUNB/ANXA1/NFKBIZ | 11 | 0.161764705882353  |
| GO:0051283 BP | GO:0051283 negative      | 17/1414 | 125/18903 | 0.011799930 | 0.0415383 | 0.02661852 | THY1/FLNA/PLCG2/DDIT3/F | 17 | 0.136              |
| GO:0003073 BP | GO:0003073 regulation of | 14/1414 | 96/18903  | 0.011888214 | 0.0417986 | 0.02678534 | TPM1/SOD2/ADM/CTSZ/CYBA | 14 | 0.1458333333333333 |
| GO:0070664 BP | GO:0070664 negative      | 14/1414 | 96/18903  | 0.011888214 | 0.0417986 | 0.02678534 | GNPMB/SDC4/PELI1/CEBPB/ | 14 | 0.1458333333333333 |
| GO:1901136 BP | GO:1901136 carbohydrate  | 22/1414 | 176/18903 | 0.012171194 | 0.0427678 | 0.02740641 | NT5E/CHI3L1/FBXO2/CHI3L | 22 | 0.125              |
| GO:0030850 BP | GO:0030850 prostate      | 9/1414  | 51/18903  | 0.012473434 | 0.0437244 | 0.02801946 | MMP2/TNC/ID4/CRIP1/GLI3 | 9  | 0.176470588235294  |
| GO:0050982 BP | GO:0050982 detection of  | 9/1414  | 51/18903  | 0.012473434 | 0.0437244 | 0.02801946 | PIEZO1/COL11A1/SERPINE2 | 9  | 0.176470588235294  |
| GO:0060324 BP | GO:0060324 face          | 9/1414  | 51/18903  | 0.012473434 | 0.0437244 | 0.02801946 | COL1A1/MMP2/PDGFRA/CRIS | 9  | 0.176470588235294  |
| GO:0060425 BP | GO:0060425 lung          | 9/1414  | 51/18903  | 0.012473434 | 0.0437244 | 0.02801946 | RSPO2/SPRY2/FGFR2/CTSZ/ | 9  | 0.176470588235294  |
| GO:0002832 BP | GO:0002832 negative      | 16/1414 | 116/18903 | 0.012580830 | 0.0440480 | 0.02822678 | HTRA1/A2M/ARRB2/VSIG4/S | 16 | 0.137931034482759  |
| GO:0051702 BP | GO:0051702 biological    | 16/1414 | 116/18903 | 0.012580830 | 0.0440480 | 0.02822678 | JUN/EEA1/HSPA8/FN1/HSPD | 16 | 0.137931034482759  |
| GO:0043547 BP | GO:0043547 positive      | 32/1414 | 283/18903 | 0.012664195 | 0.0443132 | 0.02839677 | THY1/ASAP2/RGS16/TGM2/T | 32 | 0.113074204946996  |
| GO:0003084 BP | GO:0003084 positive      | 4/1414  | 13/18903  | 0.012894230 | 0.0446306 | 0.02860014 | CYBA/RHOA/NR2F2/WNK1    | 4  | 0.307692307692308  |
| GO:0006787 BP | GO:0006787 porphyrin-    | 4/1414  | 13/18903  | 0.012894230 | 0.0446306 | 0.02860014 | SLCO2B1/HMOX1/BLVRB/BLV | 4  | 0.307692307692308  |
| GO:0031392 BP | GO:0031392 regulation of | 4/1414  | 13/18903  | 0.012894230 | 0.0446306 | 0.02860014 | PTGS2/ANXA1/FABP5/CD74  | 4  | 0.307692307692308  |

|               |                          |         |           |             |           |            |                         |       |                  |
|---------------|--------------------------|---------|-----------|-------------|-----------|------------|-------------------------|-------|------------------|
| GO:0032341 BP | GO:0032341 aldosterone   | 4/1414  | 13/18903  | 0.012894230 | 0.0446306 | 0.02860014 | DDK3/DAB2/BMP2/BMP6     | 4 0.  | 307692307692308  |
| GO:0032530 BP | GO:0032530 regulation of | 4/1414  | 13/18903  | 0.012894230 | 0.0446306 | 0.02860014 | TWF2/EZR/PODXL/FSCN1    | 4 0.  | 307692307692308  |
| GO:0033015 BP | GO:0033015 tetrapyrrole  | 4/1414  | 13/18903  | 0.012894230 | 0.0446306 | 0.02860014 | SLCO2B1/HMOX1/BLVRB/BLV | 4 0.  | 307692307692308  |
| GO:0034144 BP | GO:0034144 negative      | 4/1414  | 13/18903  | 0.012894230 | 0.0446306 | 0.02860014 | NR1D1/LYN/TREM2/TNFAIP3 | 4 0.  | 307692307692308  |
| GO:0043379 BP | GO:0043379 memory T cell | 4/1414  | 13/18903  | 0.012894230 | 0.0446306 | 0.02860014 | HLA-DRB1/HLA-           | 4 0.  | 307692307692308  |
| GO:0051280 BP | GO:0051280 negative      | 4/1414  | 13/18903  | 0.012894230 | 0.0446306 | 0.02860014 | CALM2/GSTO1/CALM3/CALM1 | 4 0.  | 307692307692308  |
| GO:0051451 BP | GO:0051451 myoblast      | 4/1414  | 13/18903  | 0.012894230 | 0.0446306 | 0.02860014 | SIX1/ANXA1/PLEKH01/ROCK | 4 0.  | 307692307692308  |
| GO:0060100 BP | GO:0060100 positive      | 4/1414  | 13/18903  | 0.012894230 | 0.0446306 | 0.02860014 | PLCG2/NCKAP1L/TREM2/RAB | 4 0.  | 307692307692308  |
| GO:0075509 BP | GO:0075509 endocytosis   | 4/1414  | 13/18903  | 0.012894230 | 0.0446306 | 0.02860014 | CTSL/CAV1/EPS15/CAV2    | 4 0.  | 307692307692308  |
| GO:1901857 BP | GO:1901857 positive      | 4/1414  | 13/18903  | 0.012894230 | 0.0446306 | 0.02860014 | NUPR1/PRELID1/IFNAR1/IS | 4 0.  | 307692307692308  |
| GO:1903651 BP | GO:1903651 positive      | 4/1414  | 13/18903  | 0.012894230 | 0.0446306 | 0.02860014 | DAB2/EZR/MSN/RDX        | 4 0.  | 307692307692308  |
| GO:1905155 BP | GO:1905155 positive      | 4/1414  | 13/18903  | 0.012894230 | 0.0446306 | 0.02860014 | PLCG2/NCKAP1L/TREM2/RAB | 4 0.  | 307692307692308  |
| GO:1905907 BP | GO:1905907 negative      | 4/1414  | 13/18903  | 0.012894230 | 0.0446306 | 0.02860014 | CRYAB/APOE/TREM2/PFDN2  | 4 0.  | 307692307692308  |
| GO:2001046 BP | GO:2001046 positive      | 4/1414  | 13/18903  | 0.012894230 | 0.0446306 | 0.02860014 | FLNA/LIMS1/LIMS2/LAMB1  | 4 0.  | 307692307692308  |
| GO:2001198 BP | GO:2001198 regulation of | 4/1414  | 13/18903  | 0.012894230 | 0.0446306 | 0.02860014 | CEBPB/FCGR2B/HLA-       | 4 0.  | 307692307692308  |
| GO:0002753 BP | GO:0002753 cytoplasmic   | 10/1414 | 60/18903  | 0.012900267 | 0.0446306 | 0.02860014 | MAP2K6/HSPA1A/HSPA1B/NF | 10 0. | 1666666666666667 |
| GO:0055002 BP | GO:0055002 striated      | 11/1414 | 69/18903  | 0.012954851 | 0.0447398 | 0.02867014 | PDGFRA/PDGFRB/MYL9/ACTG | 11 0. | 159420289855072  |
| GO:0055021 BP | GO:0055021 regulation of | 11/1414 | 69/18903  | 0.012954851 | 0.0447398 | 0.02867014 | FOXP1/RBPJ/RUNX1/RBP4/F | 11 0. | 159420289855072  |
| GO:0061180 BP | GO:0061180 mammary gland | 11/1414 | 69/18903  | 0.012954851 | 0.0447398 | 0.02867014 | LBH/NTN1/FGF2/CEBPB/FGF | 11 0. | 159420289855072  |
| GO:0006942 BP | GO:0006942 regulation of | 14/1414 | 97/18903  | 0.012966579 | 0.0447538 | 0.02867911 | TNNT3/NR4A1/TRPV4/PDE4B | 14 0. | 144329896907216  |
| GO:0002418 BP | GO:0002418 immune        | 6/1414  | 27/18903  | 0.013120758 | 0.0450726 | 0.02888340 | HSPD1/HLA-              | 6 0.  | 2222222222222222 |
| GO:0002710 BP | GO:0002710 negative      | 6/1414  | 27/18903  | 0.013120758 | 0.0450726 | 0.02888340 | PTPRC/AHR/FCGR2B/NCKAP1 | 6 0.  | 2222222222222222 |
| GO:0003401 BP | GO:0003401 axis          | 6/1414  | 27/18903  | 0.013120758 | 0.0450726 | 0.02888340 | SIX1/MAGI2/SPRY2/FGF1/F | 6 0.  | 2222222222222222 |
| GO:0010875 BP | GO:0010875 positive      | 6/1414  | 27/18903  | 0.013120758 | 0.0450726 | 0.02888340 | NFKBIA/CAV1/APOE/TREM2/ | 6 0.  | 2222222222222222 |
| GO:0014829 BP | GO:0014829 vascular      | 6/1414  | 27/18903  | 0.013120758 | 0.0450726 | 0.02888340 | COMP/SLC8A1/DOCK4/ATP2B | 6 0.  | 2222222222222222 |
| GO:0036037 BP | GO:0036037 CD8-positive, | 6/1414  | 27/18903  | 0.013120758 | 0.0450726 | 0.02888340 | RUNX1/NCKAP1L/HLA-      | 6 0.  | 2222222222222222 |
| GO:0044342 BP | GO:0044342 type B        | 6/1414  | 27/18903  | 0.013120758 | 0.0450726 | 0.02888340 | IGFBP4/NR4A1/NR1D1/NUPR | 6 0.  | 2222222222222222 |
| GO:1901623 BP | GO:1901623 regulation of | 6/1414  | 27/18903  | 0.013120758 | 0.0450726 | 0.02888340 | CCL3/CCL2/CCL4/ADAM10/W | 6 0.  | 2222222222222222 |
| GO:0060236 BP | GO:0060236 regulation of | 8/1414  | 43/18903  | 0.013248042 | 0.0454831 | 0.02914643 | HSPA1A/HSPA1B/CHMP4B/PK | 8 0.  | 186046511627907  |
| GO:0010721 BP | GO:0010721 negative      | 23/1414 | 188/18903 | 0.013428622 | 0.0460759 | 0.02952633 | THY1/SEMA3C/FBN1/ID4/NT | 23 0. | 122340425531915  |
| GO:0009206 BP | GO:0009206 purine        | 16/1414 | 117/18903 | 0.013594095 | 0.0463215 | 0.02968369 | H19/NDUFB1/ATP5ME/ATP6V | 16 0. | 136752136752137  |
| GO:0021782 BP | GO:0021782 glial cell    | 16/1414 | 117/18903 | 0.013594095 | 0.0463215 | 0.02968369 | MXRA8/SOX4/ID4/TSPAN2/N | 16 0. | 136752136752137  |
| GO:0006119 BP | GO:0006119 oxidative     | 19/1414 | 147/18903 | 0.013594580 | 0.0463215 | 0.02968369 | NDUFA4/NDUFB1/ATP5ME/UQ | 19 0. | 129251700680272  |
| GO:0008584 BP | GO:0008584 male gonad    | 19/1414 | 147/18903 | 0.013594580 | 0.0463215 | 0.02968369 | PDGFRA/PDGFRB/COL9A3/PR | 19 0. | 129251700680272  |
| GO:0002719 BP | GO:0002719 negative      | 7/1414  | 35/18903  | 0.013595482 | 0.0463215 | 0.02968369 | TWIST1/TGFB1/RABGEF1/BS | 7     | 0.2              |
| GO:0014808 BP | GO:0014808 release of    | 7/1414  | 35/18903  | 0.013595482 | 0.0463215 | 0.02968369 | CALM2/GSTO1/NOL3/CCL3/S | 7     | 0.2              |

|               |                          |         |           |             |           |            |                         |    |                   |
|---------------|--------------------------|---------|-----------|-------------|-----------|------------|-------------------------|----|-------------------|
| GO:0032633 BP | GO:0032633 interleukin-4 | 7/1414  | 35/18903  | 0.013595482 | 0.0463215 | 0.02968369 | DDIT3/CEBPB/HLA-        | 7  | 0.2               |
| GO:0032673 BP | GO:0032673 regulation of | 7/1414  | 35/18903  | 0.013595482 | 0.0463215 | 0.02968369 | DDIT3/CEBPB/HLA-        | 7  | 0.2               |
| GO:0043276 BP | GO:0043276 anoikis       | 7/1414  | 35/18903  | 0.013595482 | 0.0463215 | 0.02968369 | PIK3R3/CAV1/ITGA5/MCL1/ | 7  | 0.2               |
| GO:0048048 BP | GO:0048048 embryonic eye | 7/1414  | 35/18903  | 0.013595482 | 0.0463215 | 0.02968369 | TWIST1/FBN1/ZEB1/EFEMP1 | 7  | 0.2               |
| GO:0060914 BP | GO:0060914 heart         | 7/1414  | 35/18903  | 0.013595482 | 0.0463215 | 0.02968369 | SIX1/RBPJ/HES1/BMP2/GNG | 7  | 0.2               |
| GO:0062098 BP | GO:0062098 regulation of | 7/1414  | 35/18903  | 0.013595482 | 0.0463215 | 0.02968369 | CFLAR/NUPR1/PELI1/BIRC2 | 7  | 0.2               |
| GO:0098657 BP | GO:0098657 import into   | 29/1414 | 252/18903 | 0.013631096 | 0.0464157 | 0.02974407 | ACTB/TRPV4/SLC29A1/SLC3 | 29 | 0.115079365079365 |
| GO:0051282 BP | GO:0051282 regulation of | 17/1414 | 127/18903 | 0.013695001 | 0.0466061 | 0.02986608 | THY1/FLNA/PLCG2/DDIT3/F | 17 | 0.133858267716535 |
| GO:0002888 BP | GO:0002888 positive      | 5/1414  | 20/18903  | 0.013971301 | 0.0472432 | 0.03027435 | TYROBP/ITGB2/SPI1/ITGAM | 5  | 0.25              |
| GO:0014856 BP | GO:0014856 skeletal      | 5/1414  | 20/18903  | 0.013971301 | 0.0472432 | 0.03027435 | FOS/SIX1/CFLAR/FGF2/CAV | 5  | 0.25              |
| GO:0035455 BP | GO:0035455 response to   | 5/1414  | 20/18903  | 0.013971301 | 0.0472432 | 0.03027435 | IFITM1/IFITM2/BST2/IFNA | 5  | 0.25              |
| GO:0042053 BP | GO:0042053 regulation of | 5/1414  | 20/18903  | 0.013971301 | 0.0472432 | 0.03027435 | ITGB2/ITGAM/ALDH2/NR4A2 | 5  | 0.25              |
| GO:0042069 BP | GO:0042069 regulation of | 5/1414  | 20/18903  | 0.013971301 | 0.0472432 | 0.03027435 | ITGB2/ITGAM/ALDH2/NR4A2 | 5  | 0.25              |
| GO:0045655 BP | GO:0045655 regulation of | 5/1414  | 20/18903  | 0.013971301 | 0.0472432 | 0.03027435 | FOXP1/ZFP36L1/HLA-      | 5  | 0.25              |
| GO:0061323 BP | GO:0061323 cell          | 5/1414  | 20/18903  | 0.013971301 | 0.0472432 | 0.03027435 | SIX1/RBPJ/HES1/GNG5/BMP | 5  | 0.25              |
| GO:0072376 BP | GO:0072376 protein       | 5/1414  | 20/18903  | 0.013971301 | 0.0472432 | 0.03027435 | FLNA/FN1/F13A1/PRCP/THB | 5  | 0.25              |
| GO:0098543 BP | GO:0098543 detection of  | 5/1414  | 20/18903  | 0.013971301 | 0.0472432 | 0.03027435 | HLA-                    | 5  | 0.25              |
| GO:1903579 BP | GO:1903579 negative      | 5/1414  | 20/18903  | 0.013971301 | 0.0472432 | 0.03027435 | H19/NUPR1/DDIT4/PID1/FB | 5  | 0.25              |
| GO:2000269 BP | GO:2000269 regulation of | 5/1414  | 20/18903  | 0.013971301 | 0.0472432 | 0.03027435 | NUPR1/STK17A/STK17B/GAS | 5  | 0.25              |
| GO:0002720 BP | GO:0002720 positive      | 12/1414 | 79/18903  | 0.014044363 | 0.0474627 | 0.03041503 | PLCG2/CD55/MAPKAPK2/CD7 | 12 | 0.151898734177215 |
| GO:0043392 BP | GO:0043392 negative      | 9/1414  | 52/18903  | 0.014111342 | 0.0476615 | 0.03054239 | JUN/DDIT3/NFKBIA/MDFI/T | 9  | 0.173076923076923 |
| GO:0045055 BP | GO:0045055 regulated     | 28/1414 | 242/18903 | 0.014172795 | 0.0478413 | 0.03065764 | S100A13/SCIN/STEAP2/RAB | 28 | 0.115702479338843 |
| GO:0002294 BP | GO:0002294 CD4-positive, | 11/1414 | 70/18903  | 0.014362610 | 0.0483980 | 0.03101439 | FOXP1/JUNB/ANXA1/NFKBIZ | 11 | 0.157142857142857 |
| GO:0006081 BP | GO:0006081 cellular      | 11/1414 | 70/18903  | 0.014362610 | 0.0483980 | 0.03101439 | DKK3/DAB2/BMP2/BMP6/TKT | 11 | 0.157142857142857 |
| GO:0051881 BP | GO:0051881 regulation of | 11/1414 | 70/18903  | 0.014362610 | 0.0483980 | 0.03101439 | CCN6/UBB/SOD2/PRELI1/P  | 11 | 0.157142857142857 |
| GO:0060135 BP | GO:0060135 maternal      | 10/1414 | 61/18903  | 0.014425881 | 0.0485832 | 0.03113304 | PTN/JUNB/STC2/SPP1/PTGS | 10 | 0.163934426229508 |
| GO:0032147 BP | GO:0032147 activation of | 19/1414 | 148/18903 | 0.014539156 | 0.0489364 | 0.03135939 | CHI3L1/GPRC5C/GPRC5A/TX | 19 | 0.128378378378378 |
| GO:0048864 BP | GO:0048864 stem cell     | 13/1414 | 89/18903  | 0.014824585 | 0.0498683 | 0.03195659 | TWIST1/SEMA3C/HES1/NRP2 | 13 | 0.146067415730337 |
| GO:0006509 BP | GO:0006509 membrane      | 8/1414  | 44/18903  | 0.015159849 | 0.0509374 | 0.03264165 | TIMP2/TIMP4/APOE/ADAM9/ | 8  | 0.181818181818182 |
| GO:0045663 BP | GO:0045663 positive      | 8/1414  | 44/18903  | 0.015159849 | 0.0509374 | 0.03264165 | SOX4/ACTB/CDON/BOC/MEF2 | 8  | 0.181818181818182 |
| GO:0061326 BP | GO:0061326 renal tubule  | 14/1414 | 99/18903  | 0.015349030 | 0.0515434 | 0.03302997 | AQP1/SIX1/NOTCH2/GLI3/H | 14 | 0.141414141414141 |
| GO:0070227 BP | GO:0070227 lymphocyte    | 12/1414 | 80/18903  | 0.015433394 | 0.0517968 | 0.03319240 | FOXP1/GLI3/PRELI1/ORMD  | 12 | 0.15              |
| GO:0014072 BP | GO:0014072 response to   | 6/1414  | 28/18903  | 0.015667807 | 0.0522529 | 0.03348462 | FOSB/PEA15/MAP1LC3A/AIF | 6  | 0.214285714285714 |
| GO:0031664 BP | GO:0031664 regulation of | 6/1414  | 28/18903  | 0.015667807 | 0.0522529 | 0.03348462 | CD55/BMP6/CD14/LY96/SAS | 6  | 0.214285714285714 |
| GO:0032801 BP | GO:0032801 receptor      | 6/1414  | 28/18903  | 0.015667807 | 0.0522529 | 0.03348462 | TGFB1/ANXA2/LAPTM5/APOE | 6  | 0.214285714285714 |
| GO:0032878 BP | GO:0032878 regulation of | 6/1414  | 28/18903  | 0.015667807 | 0.0522529 | 0.03348462 | GSN/SHTN1/RAP1B/ROCK1/C | 6  | 0.214285714285714 |

|               |                          |         |           |             |           |            |                         |                      |
|---------------|--------------------------|---------|-----------|-------------|-----------|------------|-------------------------|----------------------|
| GO:0043278 BP | GO:0043278 response to   | 6/1414  | 28/18903  | 0.015667807 | 0.0522529 | 0.03348462 | FOSB/PEA15/MAP1LC3A/AIF | 6 0.214285714285714  |
| GO:0051647 BP | GO:0051647 nucleus       | 6/1414  | 28/18903  | 0.015667807 | 0.0522529 | 0.03348462 | LMNA/NTN1/CDC42/SUN2/SY | 6 0.214285714285714  |
| GO:0060547 BP | GO:0060547 negative      | 6/1414  | 28/18903  | 0.015667807 | 0.0522529 | 0.03348462 | NUPR1/PELI1/BIRC2/CAV1/ | 6 0.214285714285714  |
| GO:0071624 BP | GO:0071624 positive      | 6/1414  | 28/18903  | 0.015667807 | 0.0522529 | 0.03348462 | CD74/C3AR1/CXCL8/C5AR1/ | 6 0.214285714285714  |
| GO:1902883 BP | GO:1902883 negative      | 6/1414  | 28/18903  | 0.015667807 | 0.0522529 | 0.03348462 | H19/TXN/MCTP1/NFE2L2/DD | 6 0.214285714285714  |
| GO:1903649 BP | GO:1903649 regulation of | 6/1414  | 28/18903  | 0.015667807 | 0.0522529 | 0.03348462 | DAB2/EZR/MSN/RDX/SNX3/C | 6 0.214285714285714  |
| GO:1904385 BP | GO:1904385 cellular      | 6/1414  | 28/18903  | 0.015667807 | 0.0522529 | 0.03348462 | INHBA/CAV1/CYBA/NFE2L2/ | 6 0.214285714285714  |
| GO:0000423 BP | GO:0000423 mitophagy     | 7/1414  | 36/18903  | 0.015816342 | 0.0525269 | 0.03366024 | RETREG1/MAP1LC3B/SQSTM1 | 7 0.194444444444444  |
| GO:0016486 BP | GO:0016486 peptide       | 7/1414  | 36/18903  | 0.015816342 | 0.0525269 | 0.03366024 | PCSK1N/CPE/CTSL/CTSZ/AT | 7 0.194444444444444  |
| GO:0018149 BP | GO:0018149 peptide       | 7/1414  | 36/18903  | 0.015816342 | 0.0525269 | 0.03366024 | COL3A1/TGM2/FN1/ANXA1/N | 7 0.194444444444444  |
| GO:0031112 BP | GO:0031112 positive      | 7/1414  | 36/18903  | 0.015816342 | 0.0525269 | 0.03366024 | HSPA1A/HSPA1B/TRPV4/RPS | 7 0.194444444444444  |
| GO:0032232 BP | GO:0032232 negative      | 7/1414  | 36/18903  | 0.015816342 | 0.0525269 | 0.03366024 | PIK3R1/PFN1/PAK2/TJP1/S | 7 0.194444444444444  |
| GO:0070306 BP | GO:0070306 lens fiber    | 7/1414  | 36/18903  | 0.015816342 | 0.0525269 | 0.03366024 | FGF2/SPRY2/ATF4/MAF/SPR | 7 0.194444444444444  |
| GO:1903514 BP | GO:1903514 release of    | 7/1414  | 36/18903  | 0.015816342 | 0.0525269 | 0.03366024 | CALM2/GSTO1/NOL3/CCL3/S | 7 0.194444444444444  |
| GO:0021537 BP | GO:0021537 telencephalon | 29/1414 | 255/18903 | 0.015822023 | 0.0525269 | 0.03366024 | COL3A1/FAT4/FOXP1/AQP1/ | 29 0.113725490196078 |
| GO:0002287 BP | GO:0002287 alpha-beta T  | 11/1414 | 71/18903  | 0.015882643 | 0.0526383 | 0.03373161 | FOXP1/JUNB/ANXA1/NFKBIZ | 11 0.154929577464789 |
| GO:0002293 BP | GO:0002293 alpha-beta T  | 11/1414 | 71/18903  | 0.015882643 | 0.0526383 | 0.03373161 | FOXP1/JUNB/ANXA1/NFKBIZ | 11 0.154929577464789 |
| GO:0032715 BP | GO:0032715 negative      | 11/1414 | 71/18903  | 0.015882643 | 0.0526383 | 0.03373161 | NMB/RABGEF1/KLF2/ARRB2/ | 11 0.154929577464789 |
| GO:0030838 BP | GO:0030838 positive      | 9/1414  | 53/18903  | 0.015902781 | 0.0526452 | 0.03373605 | PYCARD/NCKAP1L/GRB2/PFN | 9 0.169811320754717  |
| GO:2000677 BP | GO:2000677 regulation of | 9/1414  | 53/18903  | 0.015902781 | 0.0526452 | 0.03373605 | TWIST1/DDIT3/TGFB1/GTF2 | 9 0.169811320754717  |
| GO:0030166 BP | GO:0030166 proteoglycan  | 10/1414 | 62/18903  | 0.016082189 | 0.0531788 | 0.03407796 | DSEL/DSE/CYTL1/XYL1/CH  | 10 0.161290322580645 |
| GO:0046824 BP | GO:0046824 positive      | 10/1414 | 62/18903  | 0.016082189 | 0.0531788 | 0.03407796 | FLNA/GLI3/PIK3R1/RAN/TG | 10 0.161290322580645 |
| GO:0010639 BP | GO:0010639 negative      | 39/1414 | 366/18903 | 0.016161748 | 0.0534116 | 0.03422714 | CAPZB/LMNA/LIMA1/HSPA1A | 39 0.10655737704918  |
| GO:0010821 BP | GO:0010821 regulation of | 19/1414 | 150/18903 | 0.016582469 | 0.0547709 | 0.03509825 | LMNA/HSPA1A/SQSTM1/SLC2 | 19 0.126666666666667 |
| GO:0019080 BP | GO:0019080 viral gene    | 14/1414 | 100/18903 | 0.016659431 | 0.0549940 | 0.03524120 | JUN/GALNT1/HEXIM1/ZFP36 | 14 0.14              |
| GO:0007033 BP | GO:0007033 vacuole       | 25/1414 | 213/18903 | 0.016704209 | 0.0551106 | 0.03531593 | VMP1/MAP1LC3B/ATP6VOC/R | 25 0.117370892018779 |
| GO:0060048 BP | GO:0060048 cardiac       | 18/1414 | 140/18903 | 0.016821558 | 0.0554664 | 0.03554393 | GJA1/TPM1/FLNA/MAP2K6/G | 18 0.128571428571429 |
| GO:0046661 BP | GO:0046661 male sex      | 21/1414 | 171/18903 | 0.016911700 | 0.0554938 | 0.03556148 | PDGFRA/PDGFRB/COL9A3/PR | 21 0.12280701754386  |
| GO:0008212 BP | GO:0008212 mineralocorti | 4/1414  | 14/18903  | 0.017001114 | 0.0554938 | 0.03556148 | DKK3/DAB2/BMP2/BMP6     | 4 0.285714285714286  |
| GO:0030007 BP | GO:0030007 cellular      | 4/1414  | 14/18903  | 0.017001114 | 0.0554938 | 0.03556148 | KCNMA1/ATP1B3/ATP1B1/SL | 4 0.285714285714286  |
| GO:0034309 BP | GO:0034309 primary       | 4/1414  | 14/18903  | 0.017001114 | 0.0554938 | 0.03556148 | DKK3/DAB2/BMP2/BMP6     | 4 0.285714285714286  |
| GO:0035791 BP | GO:0035791 platelet-     | 4/1414  | 14/18903  | 0.017001114 | 0.0554938 | 0.03556148 | PDGFRB/PDGFRB/PTPN12/PD | 4 0.285714285714286  |
| GO:0043584 BP | GO:0043584 nose          | 4/1414  | 14/18903  | 0.017001114 | 0.0554938 | 0.03556148 | SIX1/GLI3/DLX5/SMCHD1   | 4 0.285714285714286  |
| GO:0043922 BP | GO:0043922 negative      | 4/1414  | 14/18903  | 0.017001114 | 0.0554938 | 0.03556148 | JUN/CCL3/CCL4/CCL5      | 4 0.285714285714286  |
| GO:0045059 BP | GO:0045059 positive      | 4/1414  | 14/18903  | 0.017001114 | 0.0554938 | 0.03556148 | CD74/PTPRC/DOCK2/CD3D   | 4 0.285714285714286  |
| GO:0046598 BP | GO:0046598 positive      | 4/1414  | 14/18903  | 0.017001114 | 0.0554938 | 0.03556148 | LGALS1/HLA-             | 4 0.285714285714286  |

|               |                          |         |           |             |           |            |                         |                       |
|---------------|--------------------------|---------|-----------|-------------|-----------|------------|-------------------------|-----------------------|
| GO:0050930 BP | GO:0050930 induction of  | 4/1414  | 14/18903  | 0.017001114 | 0.0554938 | 0.03556148 | VEGFA/CXCL8/PGF/CXCL12  | 4 0.285714285714286   |
| GO:0071236 BP | GO:0071236 cellular      | 4/1414  | 14/18903  | 0.017001114 | 0.0554938 | 0.03556148 | CRIP1/HSPA5/MEF2C/ACTR2 | 4 0.285714285714286   |
| GO:0075294 BP | GO:0075294 positive      | 4/1414  | 14/18903  | 0.017001114 | 0.0554938 | 0.03556148 | LGALS1/HLA-             | 4 0.285714285714286   |
| GO:0090715 BP | GO:0090715 immunological | 4/1414  | 14/18903  | 0.017001114 | 0.0554938 | 0.03556148 | HLA-DRB1/HLA-           | 4 0.285714285714286   |
| GO:1901533 BP | GO:1901533 negative      | 4/1414  | 14/18903  | 0.017001114 | 0.0554938 | 0.03556148 | HES1/ZFP36/HSPA9/NFE2L2 | 4 0.285714285714286   |
| GO:1901841 BP | GO:1901841 regulation of | 4/1414  | 14/18903  | 0.017001114 | 0.0554938 | 0.03556148 | GEM/PDE4B/CALM3/CALM1   | 4 0.285714285714286   |
| GO:1902287 BP | GO:1902287 semaphorin-   | 4/1414  | 14/18903  | 0.017001114 | 0.0554938 | 0.03556148 | NRP1/PLXND1/PLXNB2/ECE1 | 4 0.285714285714286   |
| GO:1902947 BP | GO:1902947 regulation of | 4/1414  | 14/18903  | 0.017001114 | 0.0554938 | 0.03556148 | EGR1/HSP90AA1/C5AR1/RB1 | 4 0.285714285714286   |
| GO:2001171 BP | GO:2001171 positive      | 4/1414  | 14/18903  | 0.017001114 | 0.0554938 | 0.03556148 | ENO1/PID1/TMSB4X/TREM2  | 4 0.285714285714286   |
| GO:0018210 BP | GO:0018210 peptidyl-     | 16/1414 | 120/18903 | 0.017018714 | 0.0555202 | 0.03557839 | GALNT1/CHI3L1/TGFB1/CAL | 16 0.1333333333333333 |
| GO:0030502 BP | GO:0030502 negative      | 5/1414  | 21/18903  | 0.017232717 | 0.0559056 | 0.03582540 | ECM1/LTBP3/RFLNB/CCL3/S | 5 0.238095238095238   |
| GO:0034755 BP | GO:0034755 iron ion      | 5/1414  | 21/18903  | 0.017232717 | 0.0559056 | 0.03582540 | SLC40A1/SLC39A14/SLC25A | 5 0.238095238095238   |
| GO:0060973 BP | GO:0060973 cell          | 5/1414  | 21/18903  | 0.017232717 | 0.0559056 | 0.03582540 | PDGFRB/TWIST1/SEMA3C/CD | 5 0.238095238095238   |
| GO:0071636 BP | GO:0071636 positive      | 5/1414  | 21/18903  | 0.017232717 | 0.0559056 | 0.03582540 | LUM/PTGS2/ATP6AP2/THBS1 | 5 0.238095238095238   |
| GO:0071731 BP | GO:0071731 response to   | 5/1414  | 21/18903  | 0.017232717 | 0.0559056 | 0.03582540 | AQP1/FOXO1/MMP3/CFLAR/T | 5 0.238095238095238   |
| GO:0097062 BP | GO:0097062 dendritic     | 5/1414  | 21/18903  | 0.017232717 | 0.0559056 | 0.03582540 | FCGR2B/APOE/TREM2/VPS35 | 5 0.238095238095238   |
| GO:0099515 BP | GO:0099515 actin         | 5/1414  | 21/18903  | 0.017232717 | 0.0559056 | 0.03582540 | MYO5A/SUN2/MYO1B/ACTN4/ | 5 0.238095238095238   |
| GO:0140131 BP | GO:0140131 positive      | 5/1414  | 21/18903  | 0.017232717 | 0.0559056 | 0.03582540 | CCL3/CCL4/ADAM10/WNK1/C | 5 0.238095238095238   |
| GO:1904754 BP | GO:1904754 positive      | 5/1414  | 21/18903  | 0.017232717 | 0.0559056 | 0.03582540 | DOCK4/DDR2/ADAMTS1/IGFB | 5 0.238095238095238   |
| GO:2000725 BP | GO:2000725 regulation of | 5/1414  | 21/18903  | 0.017232717 | 0.0559056 | 0.03582540 | BMP2/TGFB1/ARRB2/MEF2C/ | 5 0.238095238095238   |
| GO:0032781 BP | GO:0032781 positive      | 8/1414  | 45/18903  | 0.017263852 | 0.0559444 | 0.03585025 | TPM1/VMP1/DNAJB1/TNNT3/ | 8 0.1777777777777778  |
| GO:0098927 BP | GO:0098927 vesicle-      | 8/1414  | 45/18903  | 0.017263852 | 0.0559444 | 0.03585025 | DAB2/FLNA/EEA1/EZR/MSN/ | 8 0.1777777777777778  |
| GO:0046890 BP | GO:0046890 regulation of | 22/1414 | 182/18903 | 0.017449914 | 0.0565160 | 0.03621651 | EGR1/DKK3/DAB2/IGFBP7/S | 22 0.120879120879121  |
| GO:0014009 BP | GO:0014009 glial cell    | 9/1414  | 54/18903  | 0.017855433 | 0.0576698 | 0.03695589 | SOX4/NTN1/HES1/CSF1R/LY | 9 0.1666666666666667  |
| GO:0033157 BP | GO:0033157 regulation of | 26/1414 | 225/18903 | 0.017864358 | 0.0576698 | 0.03695589 | FLNA/GLI3/ANK3/APOD/PIK | 26 0.1155555555555556 |
| GO:0032481 BP | GO:0032481 positive      | 10/1414 | 63/18903  | 0.017875371 | 0.0576698 | 0.03695589 | PLCG2/NMB/HSP90AA1/HSPD | 10 0.158730158730159  |
| GO:0032615 BP | GO:0032615 interleukin-  | 10/1414 | 63/18903  | 0.017875371 | 0.0576698 | 0.03695589 | FOXP1/PLCG2/HSPD1/LAPTM | 10 0.158730158730159  |
| GO:0032655 BP | GO:0032655 regulation of | 10/1414 | 63/18903  | 0.017875371 | 0.0576698 | 0.03695589 | FOXP1/PLCG2/HSPD1/LAPTM | 10 0.158730158730159  |
| GO:0032731 BP | GO:0032731 positive      | 10/1414 | 63/18903  | 0.017875371 | 0.0576698 | 0.03695589 | EGR1/HSPB1/TYROBP/CCL3/ | 10 0.158730158730159  |
| GO:0099072 BP | GO:0099072 regulation of | 10/1414 | 63/18903  | 0.017875371 | 0.0576698 | 0.03695589 | GPC6/AP2A2/ADAM10/RAP1A | 10 0.158730158730159  |
| GO:0007259 BP | GO:0007259 receptor      | 21/1414 | 172/18903 | 0.017952796 | 0.0578875 | 0.03709544 | SOCS3/PTPRD/HES1/CAV1/F | 21 0.122093023255814  |
| GO:0051208 BP | GO:0051208 sequestering  | 17/1414 | 131/18903 | 0.018193149 | 0.0586301 | 0.03757131 | THY1/FLNA/PLCG2/DDIT3/F | 17 0.129770992366412  |
| GO:0006887 BP | GO:0006887 exocytosis    | 39/1414 | 369/18903 | 0.018211572 | 0.0586571 | 0.03758859 | S100A13/SCIN/STEAP2/SDC | 39 0.105691056910569  |
| GO:0018107 BP | GO:0018107 peptidyl-     | 15/1414 | 111/18903 | 0.018262231 | 0.0586915 | 0.03761064 | CHI3L1/TGFB1/CALM2/SPRY | 15 0.135135135135135  |
| GO:0043588 BP | GO:0043588 skin          | 33/1414 | 302/18903 | 0.018278590 | 0.0586915 | 0.03761064 | COL1A1/COL1A2/MAFB/COL5 | 33 0.109271523178808  |
| GO:0033144 BP | GO:0033144 negative      | 7/1414  | 37/18903  | 0.018282630 | 0.0586915 | 0.03761064 | FOXP1/DAB2/LBH/RHOA/PER | 7 0.189189189189189   |

|               |                          |         |           |             |           |            |                         |    |                   |
|---------------|--------------------------|---------|-----------|-------------|-----------|------------|-------------------------|----|-------------------|
| GO:0048846 BP | GO:0048846 axon          | 7/1414  | 37/18903  | 0.018282630 | 0.0586915 | 0.03761064 | SEMA3C/NRP2/VEGFA/NRP1/ | 7  | 0.189189189189189 |
| GO:0060416 BP | GO:0060416 response to   | 7/1414  | 37/18903  | 0.018282630 | 0.0586915 | 0.03761064 | PIK3R1/LYN/ASS1/IGFBP5/ | 7  | 0.189189189189189 |
| GO:1902284 BP | GO:1902284 neuron        | 7/1414  | 37/18903  | 0.018282630 | 0.0586915 | 0.03761064 | SEMA3C/NRP2/VEGFA/NRP1/ | 7  | 0.189189189189189 |
| GO:0044843 BP | GO:0044843 cell cycle    | 31/1414 | 280/18903 | 0.018349468 | 0.0588737 | 0.03772738 | GNPMB/ACTB/ID4/FHL1/PLC | 31 | 0.110714285714286 |
| GO:0097696 BP | GO:0097696 receptor      | 22/1414 | 183/18903 | 0.018482013 | 0.0592664 | 0.03797901 | SOCS3/PTPRD/HES1/TGFB1/ | 22 | 0.120218579234973 |
| GO:0006446 BP | GO:0006446 regulation of | 12/1414 | 82/18903  | 0.018520181 | 0.0592806 | 0.03798811 | EIF1/PPP1R15A/EIF1B/EIF | 12 | 0.146341463414634 |
| GO:0003156 BP | GO:0003156 regulation of | 6/1414  | 29/18903  | 0.018537259 | 0.0592806 | 0.03798811 | SIX1/BMP2/FGF2/FGF1/CIT | 6  | 0.206896551724138 |
| GO:0007263 BP | GO:0007263 nitric oxide  | 6/1414  | 29/18903  | 0.018537259 | 0.0592806 | 0.03798811 | RASD1/VEGFA/NDNF/APOE/D | 6  | 0.206896551724138 |
| GO:0060441 BP | GO:0060441 epithelial    | 6/1414  | 29/18903  | 0.018537259 | 0.0592806 | 0.03798811 | RSPO2/SPRY2/FGFR2/CTSZ/ | 6  | 0.206896551724138 |
| GO:1902175 BP | GO:1902175 regulation of | 6/1414  | 29/18903  | 0.018537259 | 0.0592806 | 0.03798811 | SOD2/HSPB1/NOL3/TREM2/M | 6  | 0.206896551724138 |
| GO:0009306 BP | GO:0009306 protein       | 38/1414 | 359/18903 | 0.019147816 | 0.0611995 | 0.03921782 | LTBP2/SOX4/CAVIN1/COMP/ | 38 | 0.105849582172702 |
| GO:1903578 BP | GO:1903578 regulation of | 11/1414 | 73/18903  | 0.019279890 | 0.0615879 | 0.03946670 | H19/NUPR1/DDIT4/ENO1/PI | 11 | 0.150684931506849 |
| GO:0042742 BP | GO:0042742 defense       | 40/1414 | 382/18903 | 0.019450966 | 0.0621004 | 0.03979510 | FOXP1/AQP1/RBPJ/NOTCH2/ | 40 | 0.104712041884817 |
| GO:0048565 BP | GO:0048565 digestive     | 17/1414 | 132/18903 | 0.019477833 | 0.0621521 | 0.03982827 | COL3A1/PDGFR/GLI3/HES1  | 17 | 0.128787878787879 |
| GO:0060419 BP | GO:0060419 heart growth  | 14/1414 | 102/18903 | 0.019534359 | 0.0622409 | 0.03988514 | FOXP1/RBPJ/RUNX1/RBP4/F | 14 | 0.137254901960784 |
| GO:0035272 BP | GO:0035272 exocrine      | 8/1414  | 46/18903  | 0.019569668 | 0.0622409 | 0.03988514 | SEMA3C/TGM2/TGFB1/FGFR2 | 8  | 0.173913043478261 |
| GO:0046596 BP | GO:0046596 regulation of | 8/1414  | 46/18903  | 0.019569668 | 0.0622409 | 0.03988514 | LGALS1/IFITM1/GSN/IFITM | 8  | 0.173913043478261 |
| GO:0060443 BP | GO:0060443 mammary gland | 8/1414  | 46/18903  | 0.019569668 | 0.0622409 | 0.03988514 | GLI3/NTN1/CAV1/FGFR2/CS | 8  | 0.173913043478261 |
| GO:1990090 BP | GO:1990090 cellular      | 8/1414  | 46/18903  | 0.019569668 | 0.0622409 | 0.03988514 | HES1/MAGI2/HSPA5/ARF6/R | 8  | 0.173913043478261 |
| GO:2001239 BP | GO:2001239 regulation of | 8/1414  | 46/18903  | 0.019569668 | 0.0622409 | 0.03988514 | HSPA1A/COL2A1/HSPA1B/FG | 8  | 0.173913043478261 |
| GO:0000768 BP | GO:0000768 syncytium     | 10/1414 | 64/18903  | 0.019811514 | 0.0629072 | 0.04031211 | CDON/CFLAR/TYROBP/CD53/ | 10 | 0.15625           |
| GO:0019229 BP | GO:0019229 regulation of | 10/1414 | 64/18903  | 0.019811514 | 0.0629072 | 0.04031211 | MMP2/PTGS2/CAV1/ADM/TBX | 10 | 0.15625           |
| GO:0140253 BP | GO:0140253 cell-cell     | 10/1414 | 64/18903  | 0.019811514 | 0.0629072 | 0.04031211 | CDON/CFLAR/TYROBP/CD53/ | 10 | 0.15625           |
| GO:0035592 BP | GO:0035592 establishment | 38/1414 | 360/18903 | 0.019918031 | 0.0631912 | 0.04049415 | LTBP2/SOX4/CAVIN1/COMP/ | 38 | 0.105555555555556 |
| GO:0002686 BP | GO:0002686 negative      | 9/1414  | 55/18903  | 0.019976813 | 0.0631912 | 0.04049415 | NBL1/APOD/RABGEF1/TNFAI | 9  | 0.163636363636364 |
| GO:0042743 BP | GO:0042743 hydrogen      | 9/1414  | 55/18903  | 0.019976813 | 0.0631912 | 0.04049415 | PRDX4/GPX3/MMP3/SOD2/PR | 9  | 0.163636363636364 |
| GO:1900087 BP | GO:1900087 positive      | 9/1414  | 55/18903  | 0.019976813 | 0.0631912 | 0.04049415 | ANXA1/RGCC/CCND1/AIF1/D | 9  | 0.163636363636364 |
| GO:1902991 BP | GO:1902991 regulation of | 9/1414  | 55/18903  | 0.019976813 | 0.0631912 | 0.04049415 | LYN/APOE/RTN3/IFNGR1/RT | 9  | 0.163636363636364 |
| GO:1903202 BP | GO:1903202 negative      | 9/1414  | 55/18903  | 0.019976813 | 0.0631912 | 0.04049415 | SOD2/TXN/ATF4/HSPB1/NOL | 9  | 0.163636363636364 |
| GO:2000648 BP | GO:2000648 positive      | 9/1414  | 55/18903  | 0.019976813 | 0.0631912 | 0.04049415 | GJA1/PRRX1/ID4/LTBP3/FG | 9  | 0.163636363636364 |
| GO:0016331 BP | GO:0016331 morphogenesis | 19/1414 | 153/18903 | 0.020059227 | 0.0634175 | 0.04063917 | TWIST1/SOX4/SIX1/CTHRC1 | 19 | 0.124183006535948 |
| GO:0098742 BP | GO:0098742 cell-cell     | 31/1414 | 282/18903 | 0.020079728 | 0.0634480 | 0.04065867 | CDH11/CADM1/FAT4/PTPRD/ | 31 | 0.109929078014184 |
| GO:0055013 BP | GO:0055013 cardiac       | 12/1414 | 83/18903  | 0.020226430 | 0.0638769 | 0.04093355 | PDGFRA/FOXP1/PDGFRB/LMN | 12 | 0.144578313253012 |
| GO:0033135 BP | GO:0033135 regulation of | 18/1414 | 143/18903 | 0.020485095 | 0.0646588 | 0.04143459 | TXN/TGFB1/PTGS2/SPRY2/C | 18 | 0.125874125874126 |
| GO:0050886 BP | GO:0050886 endocrine     | 13/1414 | 93/18903  | 0.020809175 | 0.0656107 | 0.04204459 | GJA1/AQP1/DAB2/SPP1/INH | 13 | 0.139784946236559 |
| GO:0055017 BP | GO:0055017 cardiac       | 13/1414 | 93/18903  | 0.020809175 | 0.0656107 | 0.04204459 | FOXP1/RBPJ/RUNX1/RBP4/F | 13 | 0.139784946236559 |

|               |                          |         |           |             |           |            |                          |    |                   |
|---------------|--------------------------|---------|-----------|-------------|-----------|------------|--------------------------|----|-------------------|
| GO:0051222 BP | GO:0051222 positive      | 32/1414 | 294/18903 | 0.020912854 | 0.0656279 | 0.04205560 | SOX4/FLNA/GLI3/ANK3/RBP  | 32 | 0.108843537414966 |
| GO:0010881 BP | GO:0010881 regulation of | 5/1414  | 22/18903  | 0.020960889 | 0.0656279 | 0.04205560 | CALM2/GSTO1/SLC8A1/CALM  | 5  | 0.227272727272727 |
| GO:0033630 BP | GO:0033630 positive      | 5/1414  | 22/18903  | 0.020960889 | 0.0656279 | 0.04205560 | PIEZO1/NCKAP1L/ADAM9/PO  | 5  | 0.227272727272727 |
| GO:0035089 BP | GO:0035089 establishment | 5/1414  | 22/18903  | 0.020960889 | 0.0656279 | 0.04205560 | CDC42/RHOA/MSN/FAT1/FSC  | 5  | 0.227272727272727 |
| GO:0043371 BP | GO:0043371 negative      | 5/1414  | 22/18903  | 0.020960889 | 0.0656279 | 0.04205560 | RUNX1/ANXA1/BCL6/SMAD7/  | 5  | 0.227272727272727 |
| GO:0045061 BP | GO:0045061 thymic T cell | 5/1414  | 22/18903  | 0.020960889 | 0.0656279 | 0.04205560 | GLI3/CD74/PTPRC/DOCK2/C  | 5  | 0.227272727272727 |
| GO:0051767 BP | GO:0051767 nitric-oxide  | 5/1414  | 22/18903  | 0.020960889 | 0.0656279 | 0.04205560 | MAP2K6/NAMPT/CCL2/TLR4/  | 5  | 0.227272727272727 |
| GO:0051769 BP | GO:0051769 regulation of | 5/1414  | 22/18903  | 0.020960889 | 0.0656279 | 0.04205560 | MAP2K6/NAMPT/CCL2/TLR4/  | 5  | 0.227272727272727 |
| GO:0072111 BP | GO:0072111 cell          | 5/1414  | 22/18903  | 0.020960889 | 0.0656279 | 0.04205560 | EGR1/PDGFRB/CFLAR/BMP2/  | 5  | 0.227272727272727 |
| GO:1900424 BP | GO:1900424 regulation of | 5/1414  | 22/18903  | 0.020960889 | 0.0656279 | 0.04205560 | FOXP1/EMILIN2/GRN/CYBA/  | 5  | 0.227272727272727 |
| GO:1903428 BP | GO:1903428 positive      | 5/1414  | 22/18903  | 0.020960889 | 0.0656279 | 0.04205560 | H19/PLCG2/SOD2/TLR4/CYB  | 5  | 0.227272727272727 |
| GO:2000810 BP | GO:2000810 regulation of | 5/1414  | 22/18903  | 0.020960889 | 0.0656279 | 0.04205560 | SNAI1/ROCK1/TJP1/CLDN5/  | 5  | 0.227272727272727 |
| GO:2001044 BP | GO:2001044 regulation of | 5/1414  | 22/18903  | 0.020960889 | 0.0656279 | 0.04205560 | FLNA/LIMS1/LIMS2/LAMB1/  | 5  | 0.227272727272727 |
| GO:0140448 BP | GO:0140448 signaling     | 7/1414  | 38/18903  | 0.021006731 | 0.0657084 | 0.04210718 | PCSK1N/CPE/CTSL/CTSZ/AT  | 7  | 0.184210526315789 |
| GO:0000082 BP | GO:0000082 G1/S          | 28/1414 | 250/18903 | 0.021009123 | 0.0657084 | 0.04210718 | GPNMB/ACTB/ID4/FHL1/CDK  | 28 | 0.112             |
| GO:0003015 BP | GO:0003015 heart process | 29/1414 | 261/18903 | 0.021044573 | 0.0657840 | 0.04215562 | GJA1/TPM1/FLNA/MAP2K6/S  | 29 | 0.111111111111111 |
| GO:0009201 BP | GO:0009201 ribonucleosid | 16/1414 | 123/18903 | 0.021071723 | 0.0658336 | 0.04218740 | H19/NDUFB1/ATP5ME/ATP6V  | 16 | 0.130081300813008 |
| GO:0046620 BP | GO:0046620 regulation of | 14/1414 | 103/18903 | 0.021105153 | 0.0659027 | 0.04223171 | FOXP1/RBPJ/RUNX1/RBP4/F  | 14 | 0.135922330097087 |
| GO:0010633 BP | GO:0010633 negative      | 15/1414 | 113/18903 | 0.021176226 | 0.0660539 | 0.04232861 | FGF2/TGFB1/RGCC/KLF4/AP  | 15 | 0.132743362831858 |
| GO:0061640 BP | GO:0061640 cytoskeleton- | 15/1414 | 113/18903 | 0.021176226 | 0.0660539 | 0.04232861 | SEPTIN11/ANK3/RHOC/CHMP  | 15 | 0.132743362831858 |
| GO:0009651 BP | GO:0009651 response to   | 6/1414  | 30/18903  | 0.021745856 | 0.0671483 | 0.04302989 | ZFP36L1/AQP1/TRPV4/HSP9  | 6  | 0.2               |
| GO:0021602 BP | GO:0021602 cranial nerve | 6/1414  | 30/18903  | 0.021745856 | 0.0671483 | 0.04302989 | MAFB/SIX1/GLI3/NRP2/CIT  | 6  | 0.2               |
| GO:0045940 BP | GO:0045940 positive      | 6/1414  | 30/18903  | 0.021745856 | 0.0671483 | 0.04302989 | DAB2/NR1D1/BMP6/FGF1/AD  | 6  | 0.2               |
| GO:0060142 BP | GO:0060142 regulation of | 6/1414  | 30/18903  | 0.021745856 | 0.0671483 | 0.04302989 | CFLAR/TYROBP/CD53/PLEKH  | 6  | 0.2               |
| GO:0070293 BP | GO:0070293 renal         | 6/1414  | 30/18903  | 0.021745856 | 0.0671483 | 0.04302989 | AQP1/GSN/SGK1/GAS6/MLLT  | 6  | 0.2               |
| GO:0071480 BP | GO:0071480 cellular      | 6/1414  | 30/18903  | 0.021745856 | 0.0671483 | 0.04302989 | EGR1/CRYAB/CDKN1A/HSPA5  | 6  | 0.2               |
| GO:1900101 BP | GO:1900101 regulation of | 6/1414  | 30/18903  | 0.021745856 | 0.0671483 | 0.04302989 | PIK3R1/XBP1/DNAJB9/PPP1  | 6  | 0.2               |
| GO:2000108 BP | GO:2000108 positive      | 6/1414  | 30/18903  | 0.021745856 | 0.0671483 | 0.04302989 | ANXA1/PRELI1D1/LYN/MEF2C | 6  | 0.2               |
| GO:0001787 BP | GO:0001787 natural       | 4/1414  | 15/18903  | 0.021837883 | 0.0671483 | 0.04302989 | FCGR3A/IL18/HLA-         | 4  | 0.266666666666667 |
| GO:0009163 BP | GO:0009163 nucleoside    | 4/1414  | 15/18903  | 0.021837883 | 0.0671483 | 0.04302989 | NT5E/PNP/ADK/APRT        | 4  | 0.266666666666667 |
| GO:0009886 BP | GO:0009886 post-         | 4/1414  | 15/18903  | 0.021837883 | 0.0671483 | 0.04302989 | FBN1/EFEMP1/BAX/KDR      | 4  | 0.266666666666667 |
| GO:0014857 BP | GO:0014857 regulation of | 4/1414  | 15/18903  | 0.021837883 | 0.0671483 | 0.04302989 | SIX1/CFLAR/FGF2/CAV2     | 4  | 0.266666666666667 |
| GO:0019511 BP | GO:0019511 peptidyl-     | 4/1414  | 15/18903  | 0.021837883 | 0.0671483 | 0.04302989 | P4HA2/PRDX4/P4HA1/EGLN3  | 4  | 0.266666666666667 |
| GO:0032352 BP | GO:0032352 positive      | 4/1414  | 15/18903  | 0.021837883 | 0.0671483 | 0.04302989 | EGR1/DAB2/BMP6/ADM       | 4  | 0.266666666666667 |
| GO:0034404 BP | GO:0034404 nucleobase-   | 4/1414  | 15/18903  | 0.021837883 | 0.0671483 | 0.04302989 | NT5E/PNP/ADK/APRT        | 4  | 0.266666666666667 |
| GO:0042994 BP | GO:0042994 cytoplasmic   | 4/1414  | 15/18903  | 0.021837883 | 0.0671483 | 0.04302989 | NFKBIA/MDF1/TMSB4X/PKD1  | 4  | 0.266666666666667 |

|               |                          |         |           |             |           |            |                         |    |                   |
|---------------|--------------------------|---------|-----------|-------------|-----------|------------|-------------------------|----|-------------------|
| GO:0045064 BP | GO:0045064 T-helper 2    | 4/1414  | 15/18903  | 0.021837883 | 0.0671483 | 0.04302989 | ANXA1/CD86/IL18/BCL6    | 4  | 0.266666666666667 |
| GO:0045989 BP | GO:0045989 positive      | 4/1414  | 15/18903  | 0.021837883 | 0.0671483 | 0.04302989 | TRPV4/GSTO1/HSP90AA1/RG | 4  | 0.266666666666667 |
| GO:0051284 BP | GO:0051284 positive      | 4/1414  | 15/18903  | 0.021837883 | 0.0671483 | 0.04302989 | CALM2/GSTO1/CALM3/CALM1 | 4  | 0.266666666666667 |
| GO:0060099 BP | GO:0060099 regulation of | 4/1414  | 15/18903  | 0.021837883 | 0.0671483 | 0.04302989 | PLCG2/NCKAP1L/TREM2/RAB | 4  | 0.266666666666667 |
| GO:0060413 BP | GO:0060413 atrial septum | 4/1414  | 15/18903  | 0.021837883 | 0.0671483 | 0.04302989 | SOX4/NOTCH2/CCN1/BMPR2  | 4  | 0.266666666666667 |
| GO:0070262 BP | GO:0070262 peptidyl-     | 4/1414  | 15/18903  | 0.021837883 | 0.0671483 | 0.04302989 | PPP1R15A/DUSP1/PPP1CA/S | 4  | 0.266666666666667 |
| GO:0072148 BP | GO:0072148 epithelial    | 4/1414  | 15/18903  | 0.021837883 | 0.0671483 | 0.04302989 | RBPJ/PDPN/NRP1/NR2F2    | 4  | 0.266666666666667 |
| GO:0097531 BP | GO:0097531 mast cell     | 4/1414  | 15/18903  | 0.021837883 | 0.0671483 | 0.04302989 | RABGEF1/VEGFA/SWAP70/PG | 4  | 0.266666666666667 |
| GO:1900426 BP | GO:1900426 positive      | 4/1414  | 15/18903  | 0.021837883 | 0.0671483 | 0.04302989 | EMILIN2/GRN/CYBA/MMRN2  | 4  | 0.266666666666667 |
| GO:1905153 BP | GO:1905153 regulation of | 4/1414  | 15/18903  | 0.021837883 | 0.0671483 | 0.04302989 | PLCG2/NCKAP1L/TREM2/RAB | 4  | 0.266666666666667 |
| GO:2001279 BP | GO:2001279 regulation of | 4/1414  | 15/18903  | 0.021837883 | 0.0671483 | 0.04302989 | PTGS2/ANXA1/FABP5/CD74  | 4  | 0.266666666666667 |
| GO:0045333 BP | GO:0045333 cellular      | 27/1414 | 240/18903 | 0.021958301 | 0.0674830 | 0.04324437 | NDUFA4/NDUFB1/ATP5ME/UQ | 27 | 0.1125            |
| GO:0006606 BP | GO:0006606 protein       | 20/1414 | 165/18903 | 0.022043544 | 0.0675568 | 0.04329169 | LMNA/FLNA/GLI3/NFKBIA/A | 20 | 0.121212121212121 |
| GO:0021675 BP | GO:0021675 nerve         | 12/1414 | 84/18903  | 0.022046830 | 0.0675568 | 0.04329169 | MAFB/SIX1/GLI3/SULF2/HE | 12 | 0.142857142857143 |
| GO:0002701 BP | GO:0002701 negative      | 8/1414  | 47/18903  | 0.022086567 | 0.0675568 | 0.04329169 | TWIST1/TGFB1/RABGEF1/BS | 8  | 0.170212765957447 |
| GO:0002861 BP | GO:0002861 regulation of | 8/1414  | 47/18903  | 0.022086567 | 0.0675568 | 0.04329169 | PSMB4/HLA-              | 8  | 0.170212765957447 |
| GO:0046633 BP | GO:0046633 alpha-beta T  | 8/1414  | 47/18903  | 0.022086567 | 0.0675568 | 0.04329169 | CD55/PTPRC/DOCK2/IL18/H | 8  | 0.170212765957447 |
| GO:0071470 BP | GO:0071470 cellular      | 8/1414  | 47/18903  | 0.022086567 | 0.0675568 | 0.04329169 | ZFP36L1/AQP1/TRPV4/PTGS | 8  | 0.170212765957447 |
| GO:0072583 BP | GO:0072583 clathrin-     | 8/1414  | 47/18903  | 0.022086567 | 0.0675568 | 0.04329169 | DAB2/MAGI2/BMP2K/AP2A2/ | 8  | 0.170212765957447 |
| GO:0090224 BP | GO:0090224 regulation of | 8/1414  | 47/18903  | 0.022086567 | 0.0675568 | 0.04329169 | HSPA1A/HSPA1B/CHMP4B/PK | 8  | 0.170212765957447 |
| GO:0140353 BP | GO:0140353 lipid export  | 8/1414  | 47/18903  | 0.022086567 | 0.0675568 | 0.04329169 | DAB2/MAP2K6/SPP1/INHBA/ | 8  | 0.170212765957447 |
| GO:0009142 BP | GO:0009142 nucleoside    | 17/1414 | 134/18903 | 0.022254560 | 0.0679993 | 0.04357527 | H19/NDUFB1/ATP5ME/ATP6V | 17 | 0.126865671641791 |
| GO:0043467 BP | GO:0043467 regulation of | 17/1414 | 134/18903 | 0.022254560 | 0.0679993 | 0.04357527 | NDUFA4/COX7A1/TRPV4/PHL | 17 | 0.126865671641791 |
| GO:0030705 BP | GO:0030705 cytoskeleton- | 24/1414 | 208/18903 | 0.022558289 | 0.0688913 | 0.04414686 | TUBB/TUBA1A/UBB/HSPA8/R | 24 | 0.115384615384615 |
| GO:0006892 BP | GO:0006892 post-Golgi    | 14/1414 | 104/18903 | 0.022768970 | 0.0694983 | 0.04453585 | ANK3/STEAP2/LAPTM5/MYO5 | 14 | 0.134615384615385 |
| GO:0042445 BP | GO:0042445 hormone       | 27/1414 | 241/18903 | 0.023030311 | 0.0702593 | 0.04502347 | EGR1/PDGFR/CDK3/DAB2/C  | 27 | 0.112033195020747 |
| GO:1903522 BP | GO:1903522 regulation of | 29/1414 | 263/18903 | 0.023058541 | 0.0703086 | 0.04505509 | MMP2/GJA1/TPM1/FLNA/S10 | 29 | 0.110266159695817 |
| GO:0032350 BP | GO:0032350 regulation of | 7/1414  | 39/18903  | 0.024000337 | 0.0731420 | 0.04687081 | EGR1/DKK3/DAB2/STC2/BMP | 7  | 0.179487179487179 |
| GO:0048488 BP | GO:0048488 synaptic      | 10/1414 | 66/18903  | 0.024136359 | 0.0734798 | 0.04708724 | ACTG1/ACTB/FCHO2/ITSN2/ | 10 | 0.151515151515152 |
| GO:0140238 BP | GO:0140238 presynaptic   | 10/1414 | 66/18903  | 0.024136359 | 0.0734798 | 0.04708724 | ACTG1/ACTB/FCHO2/ITSN2/ | 10 | 0.151515151515152 |
| GO:0003014 BP | GO:0003014 renal system  | 16/1414 | 125/18903 | 0.024155173 | 0.0734987 | 0.04709937 | AQP1/SULF2/GSN/KCNMA1/A | 16 | 0.128             |
| GO:0042982 BP | GO:0042982 amyloid       | 13/1414 | 95/18903  | 0.024403886 | 0.0742168 | 0.04755952 | ITM2B/ITM2A/ITM2C/LYN/A | 13 | 0.136842105263158 |
| GO:0010332 BP | GO:0010332 response to   | 9/1414  | 57/18903  | 0.024754732 | 0.0751790 | 0.04817616 | EGR1/CRYAB/SOD2/CDKN1A/ | 9  | 0.157894736842105 |
| GO:0002673 BP | GO:0002673 regulation of | 8/1414  | 48/18903  | 0.024823408 | 0.0751790 | 0.04817616 | OSMR/PTGS2/PTGES/ALOX5A | 8  | 0.166666666666667 |
| GO:0008038 BP | GO:0008038 neuron        | 8/1414  | 48/18903  | 0.024823408 | 0.0751790 | 0.04817616 | CRTAC1/EMB/CXCR4/NRP1/Y | 8  | 0.166666666666667 |
| GO:0032924 BP | GO:0032924 activin       | 8/1414  | 48/18903  | 0.024823408 | 0.0751790 | 0.04817616 | MAGI2/INHBA/GDF6/CITED2 | 8  | 0.166666666666667 |

|               |                              |         |           |             |           |            |                                                    |    |                   |
|---------------|------------------------------|---------|-----------|-------------|-----------|------------|----------------------------------------------------|----|-------------------|
| GO:0035305 BP | GO:0035305 negative          | 8/1414  | 48/18903  | 0.024823408 | 0.0751790 | 0.04817616 | PPP1R15A/NCKAP1L/YWHAB/                            | 8  | 0.166666666666667 |
| GO:0048483 BP | GO:0048483 autonomic         | 8/1414  | 48/18903  | 0.024823408 | 0.0751790 | 0.04817616 | SOX4/SIX1/HES1/NRP2/VCA                            | 8  | 0.166666666666667 |
| GO:0060976 BP | GO:0060976 coronary          | 8/1414  | 48/18903  | 0.024823408 | 0.0751790 | 0.04817616 | PDGFRB/ADAMTS6/FGF2/VEG                            | 8  | 0.166666666666667 |
| GO:1990089 BP | GO:1990089 response to       | 8/1414  | 48/18903  | 0.024823408 | 0.0751790 | 0.04817616 | HES1/MAGI2/HSPA5/ARF6/R                            | 8  | 0.166666666666667 |
| GO:0007623 BP | GO:0007623 circadian         | 24/1414 | 210/18903 | 0.024976193 | 0.0756025 | 0.04844752 | EGR1/KLF10/ID4/ZFH3/ID                             | 24 | 0.114285714285714 |
| GO:0018209 BP | GO:0018209 peptidyl-         | 35/1414 | 332/18903 | 0.025082793 | 0.0757793 | 0.04856081 | GALNT1/STK38L/TXN/TGFB1                            | 35 | 0.105421686746988 |
| GO:0002053 BP | GO:0002053 positive          | 5/1414  | 23/18903  | 0.025177502 | 0.0757793 | 0.04856081 | SIX1/PRRX1/FGFR2/KDR/TG                            | 5  | 0.217391304347826 |
| GO:0003283 BP | GO:0003283 atrial septum     | 5/1414  | 23/18903  | 0.025177502 | 0.0757793 | 0.04856081 | SOX4/NOTCH2/CCN1/NPHP3/                            | 5  | 0.217391304347826 |
| GO:0010893 BP | GO:0010893 positive          | 5/1414  | 23/18903  | 0.025177502 | 0.0757793 | 0.04856081 | DAB2/NR1D1/BMP6/FGF1/AD                            | 5  | 0.217391304347826 |
| GO:0019430 BP | GO:0019430 removal of        | 5/1414  | 23/18903  | 0.025177502 | 0.0757793 | 0.04856081 | H19/SOD2/PRDX1/SOD3/NFE                            | 5  | 0.217391304347826 |
| GO:0046794 BP | GO:0046794 transport of      | 5/1414  | 23/18903  | 0.025177502 | 0.0757793 | 0.04856081 | CTSL/CAV1/BST2/EPS15/CA                            | 5  | 0.217391304347826 |
| GO:0090335 BP | GO:0090335 regulation of     | 5/1414  | 23/18903  | 0.025177502 | 0.0757793 | 0.04856081 | SIX1/TRPV4/METRNL/PTGS2                            | 5  | 0.217391304347826 |
| GO:1900120 BP | GO:1900120 regulation of     | 5/1414  | 23/18903  | 0.025177502 | 0.0757793 | 0.04856081 | PHLDA2/ANXA2/B2M/NRP1/A                            | 5  | 0.217391304347826 |
| GO:1900543 BP | GO:1900543 negative          | 5/1414  | 23/18903  | 0.025177502 | 0.0757793 | 0.04856081 | H19/NUPR1/DDIT4/PID1/FB                            | 5  | 0.217391304347826 |
| GO:1901673 BP | GO:1901673 regulation of     | 5/1414  | 23/18903  | 0.025177502 | 0.0757793 | 0.04856081 | HSPA1A/HSPA1B/CHMP4B/HN                            | 5  | 0.217391304347826 |
| GO:2001169 BP | GO:2001169 regulation of     | 5/1414  | 23/18903  | 0.025177502 | 0.0757793 | 0.04856081 | H19/ENO1/PID1/TMSB4X/TR                            | 5  | 0.217391304347826 |
| GO:0002220 BP | GO:0002220 innate immune     | 6/1414  | 31/18903  | 0.025308924 | 0.0760963 | 0.04876396 | PLCG2/TYROBP/CLEC7A/LYN                            | 6  | 0.193548387096774 |
| GO:0032148 BP | GO:0032148 activation of     | 6/1414  | 31/18903  | 0.025308924 | 0.0760963 | 0.04876396 | TXN/FGF1/IL18/CCDC88A/G                            | 6  | 0.193548387096774 |
| GO:0010822 BP | GO:0010822 positive          | 11/1414 | 76/18903  | 0.025343236 | 0.0761210 | 0.04877978 | SLC25A5/PLAUR/NMT1/PYCA                            | 11 | 0.144736842105263 |
| GO:0021536 BP | GO:0021536 diencephalon      | 11/1414 | 76/18903  | 0.025343236 | 0.0761210 | 0.04877978 | RBPJ/HES1/UBB/NRP2/BMP2                            | 11 | 0.144736842105263 |
| GO:0023061 BP | GO:0023061 signal<br>release | 47/1414 | 470/18903 | 0.025529207 | 0.0766258 | 0.04910324 | GJA1/AQP1/SOX4/DAB2/MAP<br>2K6/FOXO1/LTBP4/RBP4/NR | 47 | 0.1               |
| GO:0090316 BP | GO:0090316 positive          | 19/1414 | 157/18903 | 0.025537560 | 0.0766258 | 0.04910324 | FLNA/GLI3/ANK3/PIK3R1/R                            | 19 | 0.121019108280255 |
| GO:1904951 BP | GO:1904951 positive          | 33/1414 | 310/18903 | 0.025617836 | 0.0768271 | 0.04923227 | SOX4/FLNA/GLI3/ANK3/RBP                            | 33 | 0.106451612903226 |
| GO:0071478 BP | GO:0071478 cellular          | 22/1414 | 189/18903 | 0.025710833 | 0.0770664 | 0.04938560 | MMP2/EGR1/AQP1/CRIP1/CR                            | 22 | 0.116402116402116 |
| GO:0038127 BP | GO:0038127 ERBB              | 16/1414 | 126/18903 | 0.025818505 | 0.0773494 | 0.04956695 | RBPJ/EFEMP1/GPRC5A/TGFB                            | 16 | 0.126984126984127 |
| GO:0006970 BP | GO:0006970 response to       | 12/1414 | 86/18903  | 0.026046406 | 0.0779521 | 0.04995316 | ZFP36L1/AQP1/TRPV4/KCNM                            | 12 | 0.13953488372093  |
| GO:0007260 BP | GO:0007260 tyrosine          | 12/1414 | 86/18903  | 0.026046406 | 0.0779521 | 0.04995316 | SOCS3/HES1/CAV1/FGFR3/C                            | 12 | 0.13953488372093  |
| GO:0030518 BP | GO:0030518 intracellular     | 15/1414 | 116/18903 | 0.026187830 | 0.0783351 | 0.05019864 | FOXP1/DAB2/LBH/DNAJA1/W                            | 15 | 0.129310344827586 |
| GO:0007032 BP | GO:0007032 endosome          | 13/1414 | 96/18903  | 0.026364172 | 0.0787818 | 0.05048488 | EEA1/ATP6VOC/SQSTM1/CHM                            | 13 | 0.135416666666667 |
| GO:0072080 BP | GO:0072080 nephron           | 13/1414 | 96/18903  | 0.026364172 | 0.0787818 | 0.05048488 | AQP1/SIX1/NOTCH2/GLI3/H                            | 13 | 0.135416666666667 |
| GO:0043954 BP | GO:0043954 cellular          | 10/1414 | 67/18903  | 0.026536494 | 0.0792562 | 0.05078884 | CSF1R/FCGR2B/MTSS1/APOE                            | 10 | 0.149253731343284 |
| GO:0060759 BP | GO:0060759 regulation of     | 21/1414 | 179/18903 | 0.026705059 | 0.0797188 | 0.05108531 | ECM1/HSPA1A/HSPA1B/CAV1                            | 21 | 0.11731843575419  |
| GO:0043001 BP | GO:0043001 Golgi to          | 7/1414  | 40/18903  | 0.027274355 | 0.0810607 | 0.05194520 | ANK3/RAB31/RAB10/VAMP2/                            | 7  | 0.175             |
| GO:0050732 BP | GO:0050732 negative          | 9/1414  | 58/18903  | 0.027425100 | 0.0810607 | 0.05194520 | THY1/SOCS3/SH3BP5/GPRC5                            | 9  | 0.155172413793103 |
| GO:0002730 BP | GO:0002730 regulation of     | 4/1414  | 16/18903  | 0.027432509 | 0.0810607 | 0.05194520 | PLCG2/CLEC7A/BST2/TLR4                             | 4  | 0.25              |

|               |                          |         |           |             |           |            |                         |    |                   |
|---------------|--------------------------|---------|-----------|-------------|-----------|------------|-------------------------|----|-------------------|
| GO:0006825 BP | GO:0006825 copper ion    | 4/1414  | 16/18903  | 0.027432509 | 0.0810607 | 0.05194520 | CP/STEAP4/STEAP2/STEAP3 | 4  | 0.25              |
| GO:0021783 BP | GO:0021783 preganglionic | 4/1414  | 16/18903  | 0.027432509 | 0.0810607 | 0.05194520 | SIX1/HES1/NRP2/NRP1     | 4  | 0.25              |
| GO:0023035 BP | GO:0023035 CD40          | 4/1414  | 16/18903  | 0.027432509 | 0.0810607 | 0.05194520 | ITGA5/CD86/TREM2/TNFAIP | 4  | 0.25              |
| GO:0030033 BP | GO:0030033 microvillus   | 4/1414  | 16/18903  | 0.027432509 | 0.0810607 | 0.05194520 | STK26/EZR/PODXL/FSCN1   | 4  | 0.25              |
| GO:0030852 BP | GO:0030852 regulation of | 4/1414  | 16/18903  | 0.027432509 | 0.0810607 | 0.05194520 | RUNX1/C1QC/EVI2B/HCLS1  | 4  | 0.25              |
| GO:0036376 BP | GO:0036376 sodium ion    | 4/1414  | 16/18903  | 0.027432509 | 0.0810607 | 0.05194520 | FXYD1/ATP1B3/ATP1B1/SLC | 4  | 0.25              |
| GO:0043517 BP | GO:0043517 positive      | 4/1414  | 16/18903  | 0.027432509 | 0.0810607 | 0.05194520 | PMAIP1/SPRED1/DDX5/RPL2 | 4  | 0.25              |
| GO:0045651 BP | GO:0045651 positive      | 4/1414  | 16/18903  | 0.027432509 | 0.0810607 | 0.05194520 | TGFB1/ID2/HCLS1/RB1     | 4  | 0.25              |
| GO:0050872 BP | GO:0050872 white fat     | 4/1414  | 16/18903  | 0.027432509 | 0.0810607 | 0.05194520 | PDGFRA/TBL1XR1/RETREG1/ | 4  | 0.25              |
| GO:0061101 BP | GO:0061101 neuroendocrin | 4/1414  | 16/18903  | 0.027432509 | 0.0810607 | 0.05194520 | HES1/BMP2/FGF2/JAG1     | 4  | 0.25              |
| GO:0061684 BP | GO:0061684 chaperone-    | 4/1414  | 16/18903  | 0.027432509 | 0.0810607 | 0.05194520 | LAMP2/HSPA8/HSP90AA1/CT | 4  | 0.25              |
| GO:0090030 BP | GO:0090030 regulation of | 4/1414  | 16/18903  | 0.027432509 | 0.0810607 | 0.05194520 | DKK3/DAB2/BMP2/BMP6     | 4  | 0.25              |
| GO:0090336 BP | GO:0090336 positive      | 4/1414  | 16/18903  | 0.027432509 | 0.0810607 | 0.05194520 | SIX1/METRNL/PTGS2/HNRNP | 4  | 0.25              |
| GO:0099170 BP | GO:0099170 postsynaptic  | 4/1414  | 16/18903  | 0.027432509 | 0.0810607 | 0.05194520 | EIF4E/CYFIP1/PLCB1/RNF1 | 4  | 0.25              |
| GO:1900044 BP | GO:1900044 regulation of | 4/1414  | 16/18903  | 0.027432509 | 0.0810607 | 0.05194520 | BIRC2/DDX3X/SASH1/PTPN2 | 4  | 0.25              |
| GO:1901201 BP | GO:1901201 regulation of | 4/1414  | 16/18903  | 0.027432509 | 0.0810607 | 0.05194520 | ANTXR1/TGFB1/RGCC/TIE1  | 4  | 0.25              |
| GO:1902931 BP | GO:1902931 negative      | 4/1414  | 16/18903  | 0.027432509 | 0.0810607 | 0.05194520 | DKK3/BMP2/PLEK/APOE     | 4  | 0.25              |
| GO:0006024 BP | GO:0006024 glycosaminogl | 11/1414 | 77/18903  | 0.027641512 | 0.0815956 | 0.05228798 | PDGFRB/DSEL/DSE/XYLT1/C | 11 | 0.142857142857143 |
| GO:0006919 BP | GO:0006919 activation of | 11/1414 | 77/18903  | 0.027641512 | 0.0815956 | 0.05228798 | CFLAR/CYCS/HSPD1/RPS27L | 11 | 0.142857142857143 |
| GO:0051170 BP | GO:0051170 import into   | 20/1414 | 169/18903 | 0.027695073 | 0.0817123 | 0.05236280 | LMNA/FLNA/GLI3/NFKBIA/A | 20 | 0.118343195266272 |
| GO:0043457 BP | GO:0043457 regulation of | 8/1414  | 49/18903  | 0.027788586 | 0.0819468 | 0.05251304 | COX7A1/TRPV4/NUPR1/NOP5 | 8  | 0.163265306122449 |
| GO:0019915 BP | GO:0019915 lipid storage | 12/1414 | 87/18903  | 0.028233525 | 0.0830071 | 0.05319251 | NFKBIA/HILPDA/CAV1/MSR1 | 12 | 0.137931034482759 |
| GO:0050672 BP | GO:0050672 negative      | 12/1414 | 87/18903  | 0.028233525 | 0.0830071 | 0.05319251 | GPNMB/SDC4/PELI1/CEBPB/ | 12 | 0.137931034482759 |
| GO:0071277 BP | GO:0071277 cellular      | 12/1414 | 87/18903  | 0.028233525 | 0.0830071 | 0.05319251 | JUN/FOSB/FOS/PLCG2/JUNB | 12 | 0.137931034482759 |
| GO:0099175 BP | GO:0099175 regulation of | 12/1414 | 87/18903  | 0.028233525 | 0.0830071 | 0.05319251 | PTPRD/HSPA8/NRP2/ARF4/S | 12 | 0.137931034482759 |
| GO:1900182 BP | GO:1900182 positive      | 12/1414 | 87/18903  | 0.028233525 | 0.0830071 | 0.05319251 | FLNA/GLI3/PIK3R1/RAN/TG | 12 | 0.137931034482759 |
| GO:2000134 BP | GO:2000134 negative      | 12/1414 | 87/18903  | 0.028233525 | 0.0830071 | 0.05319251 | GPNMB/FHL1/CDKN1A/INHBA | 12 | 0.137931034482759 |
| GO:0006576 BP | GO:0006576 cellular      | 13/1414 | 97/18903  | 0.028437609 | 0.0835650 | 0.05355002 | SRM/SAT1/OAZ1/ODC1/ITGB | 13 | 0.134020618556701 |
| GO:0098739 BP | GO:0098739 import across | 23/1414 | 202/18903 | 0.028805970 | 0.0846048 | 0.05421635 | TRPV4/SLC39A14/SLC7A2/S | 23 | 0.113861386138614 |
| GO:0018105 BP | GO:0018105 peptidyl-     | 33/1414 | 313/18903 | 0.028898595 | 0.0848341 | 0.05436331 | STK38L/TXN/TGFB1/PTGS2/ | 33 | 0.105431309904153 |
| GO:0006949 BP | GO:0006949 syncytium     | 10/1414 | 68/18903  | 0.029102402 | 0.0853036 | 0.05466417 | CDON/CFLAR/TYROBP/CD53/ | 10 | 0.147058823529412 |
| GO:0042987 BP | GO:0042987 amyloid       | 10/1414 | 68/18903  | 0.029102402 | 0.0853036 | 0.05466417 | LYN/APOE/RTN3/IFNGR1/RT | 10 | 0.147058823529412 |
| GO:1902808 BP | GO:1902808 positive      | 10/1414 | 68/18903  | 0.029102402 | 0.0853036 | 0.05466417 | PLCG2/ANXA1/RGCC/CCND1/ | 10 | 0.147058823529412 |
| GO:0001516 BP | GO:0001516 prostaglandin | 6/1414  | 32/18903  | 0.029240242 | 0.0854500 | 0.05475799 | PTGS2/ANXA1/FABP5/PTGES | 6  | 0.1875            |
| GO:0002758 BP | GO:0002758 innate immune | 6/1414  | 32/18903  | 0.029240242 | 0.0854500 | 0.05475799 | PLCG2/TYROBP/CLEC7A/LYN | 6  | 0.1875            |
| GO:0031116 BP | GO:0031116 positive      | 6/1414  | 32/18903  | 0.029240242 | 0.0854500 | 0.05475799 | HSPA1A/HSPA1B/RPS3/RAC1 | 6  | 0.1875            |

|               |                                      |         |           |             |           |            |                         |    |                    |
|---------------|--------------------------------------|---------|-----------|-------------|-----------|------------|-------------------------|----|--------------------|
| GO:0035456 BP | GO:0035456 response to               | 6/1414  | 32/18903  | 0.029240242 | 0.0854500 | 0.05475799 | IFITM1/IFITM2/BST2/MNDA | 6  | 0.1875             |
| GO:0046457 BP | GO:0046457 prostanoid                | 6/1414  | 32/18903  | 0.029240242 | 0.0854500 | 0.05475799 | PTGS2/ANXA1/FABP5/PTGES | 6  | 0.1875             |
| GO:1903715 BP | GO:1903715 regulation of             | 6/1414  | 32/18903  | 0.029240242 | 0.0854500 | 0.05475799 | COX7A1/TRPV4/NUPR1/NOP5 | 6  | 0.1875             |
| GO:0006417 BP | GO:0006417 regulation of translation | 48/1414 | 486/18903 | 0.029361089 | 0.0857602 | 0.05495676 | ZFP36L1/SOX4/DIO2/TNRC6 | 48 | 0.0987654320987654 |
| GO:0046879 BP | GO:0046879 hormone                   | 31/1414 | 291/18903 | 0.029517322 | 0.0861734 | 0.05522154 | GJA1/AQP1/SOX4/DAB2/FOX | 31 | 0.106529209621993  |
| GO:0006941 BP | GO:0006941 striated                  | 21/1414 | 181/18903 | 0.029720177 | 0.0866788 | 0.05554544 | GJA1/TPM1/FLNA/MAP2K6/T | 21 | 0.116022099447514  |
| GO:0042770 BP | GO:0042770 signal                    | 21/1414 | 181/18903 | 0.029720177 | 0.0866788 | 0.05554544 | TWIST1/SOX4/SNAI1/NDRG1 | 21 | 0.116022099447514  |
| GO:0001759 BP | GO:0001759 organ                     | 5/1414  | 24/18903  | 0.029900891 | 0.0867720 | 0.05560516 | SIX1/BMP2/FGF2/FGF1/SPR | 5  | 0.2083333333333333 |
| GO:0006123 BP | GO:0006123 mitochondrial             | 5/1414  | 24/18903  | 0.029900891 | 0.0867720 | 0.05560516 | NDUFA4/COX7A1/CYCS/COX5 | 5  | 0.2083333333333333 |
| GO:0030859 BP | GO:0030859 polarized                 | 5/1414  | 24/18903  | 0.029900891 | 0.0867720 | 0.05560516 | CDC42/RHOA/MSN/RAB10/FA | 5  | 0.2083333333333333 |
| GO:0035162 BP | GO:0035162 embryonic                 | 5/1414  | 24/18903  | 0.029900891 | 0.0867720 | 0.05560516 | VEGFA/ATF4/STK4/KDR/TGF | 5  | 0.2083333333333333 |
| GO:0035988 BP | GO:0035988 chondrocyte               | 5/1414  | 24/18903  | 0.029900891 | 0.0867720 | 0.05560516 | COMP/FGFR3/DDR2/SMAD7/B | 5  | 0.2083333333333333 |
| GO:0040037 BP | GO:0040037 negative                  | 5/1414  | 24/18903  | 0.029900891 | 0.0867720 | 0.05560516 | SULF2/FGF2/SPRY2/THBS1/ | 5  | 0.2083333333333333 |
| GO:0061484 BP | GO:0061484 hematopoietic             | 5/1414  | 24/18903  | 0.029900891 | 0.0867720 | 0.05560516 | FSTL1/SOX4/CRISPLD1/EMC | 5  | 0.2083333333333333 |
| GO:0071676 BP | GO:0071676 negative                  | 5/1414  | 24/18903  | 0.029900891 | 0.0867720 | 0.05560516 | NBL1/APOD/CCL2/DUSP1/PL | 5  | 0.2083333333333333 |
| GO:2000353 BP | GO:2000353 positive                  | 5/1414  | 24/18903  | 0.029900891 | 0.0867720 | 0.05560516 | RGCC/CCL2/THBS1/PDCD4/E | 5  | 0.2083333333333333 |
| GO:2000738 BP | GO:2000738 positive                  | 5/1414  | 24/18903  | 0.029900891 | 0.0867720 | 0.05560516 | LTBP3/SOX5/PTN/FGF2/SOX | 5  | 0.2083333333333333 |
| GO:0050830 BP | GO:0050830 defense                   | 15/1414 | 118/18903 | 0.029986934 | 0.0869785 | 0.05573744 | PLA2G2A/RPL39/GBP2/LYZ/ | 15 | 0.127118644067797  |
| GO:0043537 BP | GO:0043537 negative                  | 11/1414 | 78/18903  | 0.030085973 | 0.0871357 | 0.05583823 | FGF2/TGFB1/RGCC/KLF4/AP | 11 | 0.141025641025641  |
| GO:0055117 BP | GO:0055117 regulation of             | 11/1414 | 78/18903  | 0.030085973 | 0.0871357 | 0.05583823 | PDE4B/CALM2/GSTO1/CAV1/ | 11 | 0.141025641025641  |
| GO:0140115 BP | GO:0140115 export across             | 11/1414 | 78/18903  | 0.030085973 | 0.0871357 | 0.05583823 | GJA1/SLC40A1/FXYD1/CALM | 11 | 0.141025641025641  |
| GO:0010574 BP | GO:0010574 regulation of             | 9/1414  | 59/18903  | 0.030291781 | 0.0875145 | 0.05608097 | SULF2/NDRG2/TGFB1/PTGS2 | 9  | 0.152542372881356  |
| GO:0045604 BP | GO:0045604 regulation of             | 9/1414  | 59/18903  | 0.030291781 | 0.0875145 | 0.05608097 | ZFP36L1/HES1/ZFP36/FGF2 | 9  | 0.152542372881356  |
| GO:0051653 BP | GO:0051653 spindle                   | 9/1414  | 59/18903  | 0.030291781 | 0.0875145 | 0.05608097 | GJA1/SPRY2/ACTR2/ACTR3/ | 9  | 0.152542372881356  |
| GO:0097352 BP | GO:0097352 autophagosome             | 9/1414  | 59/18903  | 0.030291781 | 0.0875145 | 0.05608097 | LAMP2/VMP1/MAP1LC3B/CHM | 9  | 0.152542372881356  |
| GO:1903078 BP | GO:1903078 positive                  | 9/1414  | 59/18903  | 0.030291781 | 0.0875145 | 0.05608097 | PIK3R1/SQSTM1/TREM2/RHO | 9  | 0.152542372881356  |
| GO:1902600 BP | GO:1902600 proton                    | 19/1414 | 160/18903 | 0.030339234 | 0.0876082 | 0.05614102 | TWIST1/NDUFA4/ATP5ME/CO | 19 | 0.11875            |
| GO:0033138 BP | GO:0033138 positive                  | 14/1414 | 108/18903 | 0.030414857 | 0.0877832 | 0.05625311 | TXN/TGFB1/PTGS2/SPRY2/C | 14 | 0.12962962962963   |
| GO:0032945 BP | GO:0032945 negative                  | 12/1414 | 88/18903  | 0.030550649 | 0.0881315 | 0.05647631 | GPNMB/SDC4/PELI1/CEBPB/ | 12 | 0.1363636363636363 |
| GO:0014912 BP | GO:0014912 negative                  | 7/1414  | 41/18903  | 0.030838835 | 0.0888310 | 0.05692460 | TPM1/AIF1/MEF2C/GNA13/R | 7  | 0.170731707317073  |
| GO:0045454 BP | GO:0045454 cell redox                | 7/1414  | 41/18903  | 0.030838835 | 0.0888310 | 0.05692460 | PRDX4/DDIT3/TXN/PRDX1/G | 7  | 0.170731707317073  |
| GO:0120178 BP | GO:0120178 steroid                   | 7/1414  | 41/18903  | 0.030838835 | 0.0888310 | 0.05692460 | EGR1/DKK3/DAB2/BMP2/BMP | 7  | 0.170731707317073  |
| GO:0097553 BP | GO:0097553 calcium ion               | 21/1414 | 182/18903 | 0.031320646 | 0.0901743 | 0.05778542 | THY1/FLNA/PLCG2/DDIT3/T | 21 | 0.115384615384615  |
| GO:0051148 BP | GO:0051148 negative                  | 10/1414 | 69/18903  | 0.031839275 | 0.0915771 | 0.05868434 | FOXP1/BMP2/XBP1/BHLHE41 | 10 | 0.144927536231884  |
| GO:1902305 BP | GO:1902305 regulation of             | 10/1414 | 69/18903  | 0.031839275 | 0.0915771 | 0.05868434 | ANK3/FXYD1/GLRX/ATP1B3/ | 10 | 0.144927536231884  |

|               |                          |         |           |             |           |            |                          |    |                   |
|---------------|--------------------------|---------|-----------|-------------|-----------|------------|--------------------------|----|-------------------|
| GO:0002708 BP | GO:0002708 positive      | 15/1414 | 119/18903 | 0.032031597 | 0.0920849 | 0.05900972 | CADM1/LAG3/CD55/TGFB1/H  | 15 | 0.126050420168067 |
| GO:0071326 BP | GO:0071326 cellular      | 17/1414 | 140/18903 | 0.032396835 | 0.0930890 | 0.05965318 | SOX4/SLC29A1/PIM3/SLC39  | 17 | 0.121428571428571 |
| GO:0033209 BP | GO:0033209 tumor         | 14/1414 | 109/18903 | 0.032588594 | 0.0935939 | 0.05997672 | HSPA1A/HSPA1B/NFKBIA/BI  | 14 | 0.128440366972477 |
| GO:0036465 BP | GO:0036465 synaptic      | 11/1414 | 79/18903  | 0.032680939 | 0.0937668 | 0.06008751 | ACTG1/ACTB/CYFIP1/FCH02  | 11 | 0.139240506329114 |
| GO:0061333 BP | GO:0061333 renal tubule  | 11/1414 | 79/18903  | 0.032680939 | 0.0937668 | 0.06008751 | SIX1/GLI3/HES1/BMP2/FGF  | 11 | 0.139240506329114 |
| GO:0062012 BP | GO:0062012 regulation of | 35/1414 | 339/18903 | 0.032784811 | 0.0940185 | 0.06024885 | IGFBP4/EGR1/DKK3/TWIST1  | 35 | 0.103244837758112 |
| GO:0045787 BP | GO:0045787 positive      | 37/1414 | 362/18903 | 0.032915023 | 0.0942541 | 0.06039979 | PDGFRB/CCPG1/SMOC2/PLCG  | 37 | 0.102209944751381 |
| GO:0009060 BP | GO:0009060 aerobic       | 22/1414 | 194/18903 | 0.033238901 | 0.0942541 | 0.06039979 | NDUFA4/NDUFB1/ATP5ME/UQ  | 22 | 0.11340206185567  |
| GO:0061136 BP | GO:0061136 regulation of | 22/1414 | 194/18903 | 0.033238901 | 0.0942541 | 0.06039979 | DAB2/HSPA1A/UBB/HSPA1B/  | 22 | 0.11340206185567  |
| GO:0019079 BP | GO:0019079 viral genome  | 16/1414 | 130/18903 | 0.033336650 | 0.0942541 | 0.06039979 | IFITM1/HSPA8/SLPI/IFITM  | 16 | 0.123076923076923 |
| GO:0022029 BP | GO:0022029 telencephalon | 9/1414  | 60/18903  | 0.033360872 | 0.0942541 | 0.06039979 | COL3A1/GLI3/DIXDC1/CXCR  | 9  | 0.15              |
| GO:2000649 BP | GO:2000649 regulation of | 9/1414  | 60/18903  | 0.033360872 | 0.0942541 | 0.06039979 | ANK3/FXYD1/GLRX/ATP1B1/  | 9  | 0.15              |
| GO:0002828 BP | GO:0002828 regulation of | 6/1414  | 33/18903  | 0.033551941 | 0.0942541 | 0.06039979 | ECM1/ANXA1/CD74/CD86/IL  | 6  | 0.181818181818182 |
| GO:0030511 BP | GO:0030511 positive      | 6/1414  | 33/18903  | 0.033551941 | 0.0942541 | 0.06039979 | DAB2/ZEB2/SDCBP/TGFBR3/  | 6  | 0.181818181818182 |
| GO:0048147 BP | GO:0048147 negative      | 6/1414  | 33/18903  | 0.033551941 | 0.0942541 | 0.06039979 | SOD2/NUPR1/CAV1/FTH1/IF  | 6  | 0.181818181818182 |
| GO:0048841 BP | GO:0048841 regulation of | 6/1414  | 33/18903  | 0.033551941 | 0.0942541 | 0.06039979 | SEMA3C/VEGFA/NRP1/SEMA3  | 6  | 0.181818181818182 |
| GO:0050858 BP | GO:0050858 negative      | 6/1414  | 33/18903  | 0.033551941 | 0.0942541 | 0.06039979 | THY1/LAPT5M5/FCGR2B/EZR/ | 6  | 0.181818181818182 |
| GO:0050974 BP | GO:0050974 detection of  | 6/1414  | 33/18903  | 0.033551941 | 0.0942541 | 0.06039979 | COL11A1/SERPINE2/CXCR4/  | 6  | 0.181818181818182 |
| GO:1903846 BP | GO:1903846 positive      | 6/1414  | 33/18903  | 0.033551941 | 0.0942541 | 0.06039979 | DAB2/ZEB2/SDCBP/TGFBR3/  | 6  | 0.181818181818182 |
| GO:0001542 BP | GO:0001542 ovulation     | 3/1414  | 10/18903  | 0.033656989 | 0.0942541 | 0.06039979 | MMP2/NRIP1/ADAMTS1       | 3  | 0.3               |
| GO:0003056 BP | GO:0003056 regulation of | 3/1414  | 10/18903  | 0.033656989 | 0.0942541 | 0.06039979 | DOCK4/ATP2B1/RHOA        | 3  | 0.3               |
| GO:0003093 BP | GO:0003093 regulation of | 3/1414  | 10/18903  | 0.033656989 | 0.0942541 | 0.06039979 | CYBA/GAS6/PDGFB          | 3  | 0.3               |
| GO:0003253 BP | GO:0003253 cardiac       | 3/1414  | 10/18903  | 0.033656989 | 0.0942541 | 0.06039979 | TWIST1/SEMA3C/CDC42      | 3  | 0.3               |
| GO:0003266 BP | GO:0003266 regulation of | 3/1414  | 10/18903  | 0.033656989 | 0.0942541 | 0.06039979 | SIX1/HES1/GNG5           | 3  | 0.3               |
| GO:0007343 BP | GO:0007343 egg           | 3/1414  | 10/18903  | 0.033656989 | 0.0942541 | 0.06039979 | MYH9/PLAT/PLCB1          | 3  | 0.3               |
| GO:0010572 BP | GO:0010572 positive      | 3/1414  | 10/18903  | 0.033656989 | 0.0942541 | 0.06039979 | FLNA/PLEK/TLR4           | 3  | 0.3               |
| GO:0010764 BP | GO:0010764 negative      | 3/1414  | 10/18903  | 0.033656989 | 0.0942541 | 0.06039979 | FGF2/RAC1/HYAL2          | 3  | 0.3               |
| GO:0021561 BP | GO:0021561 facial nerve  | 3/1414  | 10/18903  | 0.033656989 | 0.0942541 | 0.06039979 | SIX1/NRP2/NRP1           | 3  | 0.3               |
| GO:0021610 BP | GO:0021610 facial nerve  | 3/1414  | 10/18903  | 0.033656989 | 0.0942541 | 0.06039979 | SIX1/NRP2/NRP1           | 3  | 0.3               |
| GO:0030953 BP | GO:0030953 astral        | 3/1414  | 10/18903  | 0.033656989 | 0.0942541 | 0.06039979 | EZR/RAB11A/NUMA1         | 3  | 0.3               |
| GO:0032819 BP | GO:0032819 positive      | 3/1414  | 10/18903  | 0.033656989 | 0.0942541 | 0.06039979 | FCGR3A/IL18/HLA-E        | 3  | 0.3               |
| GO:0033007 BP | GO:0033007 negative      | 3/1414  | 10/18903  | 0.033656989 | 0.0942541 | 0.06039979 | RABGEF1/CD84/HMOX1       | 3  | 0.3               |
| GO:0035768 BP | GO:0035768 endothelial   | 3/1414  | 10/18903  | 0.033656989 | 0.0942541 | 0.06039979 | FGFR1/FGF2/FGF1          | 3  | 0.3               |
| GO:0044341 BP | GO:0044341 sodium-       | 3/1414  | 10/18903  | 0.033656989 | 0.0942541 | 0.06039979 | CEBPB/ATF4/SFRP4         | 3  | 0.3               |
| GO:0044351 BP | GO:0044351 macropinocyto | 3/1414  | 10/18903  | 0.033656989 | 0.0942541 | 0.06039979 | MAPKAPK2/PYCARD/DOCK2    | 3  | 0.3               |
| GO:0051409 BP | GO:0051409 response to   | 3/1414  | 10/18903  | 0.033656989 | 0.0942541 | 0.06039979 | DDIT3/DNAJA1/DUSP6       | 3  | 0.3               |

|               |                          |         |           |             |           |            |                         |                     |       |
|---------------|--------------------------|---------|-----------|-------------|-----------|------------|-------------------------|---------------------|-------|
| GO:0060346 BP | GO:0060346 bone          | 3/1414  | 10/18903  | 0.033656989 | 0.0942541 | 0.06039979 | COL1A1/MMP2/CHAD        | 3                   | 0.3   |
| GO:0060368 BP | GO:0060368 regulation of | 3/1414  | 10/18903  | 0.033656989 | 0.0942541 | 0.06039979 | RABGEF1/PTPRC/LYN       | 3                   | 0.3   |
| GO:0060502 BP | GO:0060502 epithelial    | 3/1414  | 10/18903  | 0.033656989 | 0.0942541 | 0.06039979 | FGFR2/CDC42/NFIB        | 3                   | 0.3   |
| GO:0061626 BP | GO:0061626 pharyngeal    | 3/1414  | 10/18903  | 0.033656989 | 0.0942541 | 0.06039979 | HES1/ADGRF5/BMP2        | 3                   | 0.3   |
| GO:0070391 BP | GO:0070391 response to   | 3/1414  | 10/18903  | 0.033656989 | 0.0942541 | 0.06039979 | CD14/TREM2/TLR4         | 3                   | 0.3   |
| GO:0071223 BP | GO:0071223 cellular      | 3/1414  | 10/18903  | 0.033656989 | 0.0942541 | 0.06039979 | CD14/TREM2/TLR4         | 3                   | 0.3   |
| GO:0071476 BP | GO:0071476 cellular      | 3/1414  | 10/18903  | 0.033656989 | 0.0942541 | 0.06039979 | TRPV4/FBP1/CAB39        | 3                   | 0.3   |
| GO:0098974 BP | GO:0098974 postsynaptic  | 3/1414  | 10/18903  | 0.033656989 | 0.0942541 | 0.06039979 | ACTG1/ACTB/FARP1        | 3                   | 0.3   |
| GO:1902959 BP | GO:1902959 regulation of | 3/1414  | 10/18903  | 0.033656989 | 0.0942541 | 0.06039979 | LYN/PICALM/EFNA1        | 3                   | 0.3   |
| GO:1903980 BP | GO:1903980 positive      | 3/1414  | 10/18903  | 0.033656989 | 0.0942541 | 0.06039979 | CCL3/TREM2/CTSC         | 3                   | 0.3   |
| GO:1905461 BP | GO:1905461 positive      | 3/1414  | 10/18903  | 0.033656989 | 0.0942541 | 0.06039979 | SOD2/ATF4/PDCD4         | 3                   | 0.3   |
| GO:2000425 BP | GO:2000425 regulation of | 3/1414  | 10/18903  | 0.033656989 | 0.0942541 | 0.06039979 | TGM2/CCL2/TREM2         | 3                   | 0.3   |
| GO:2000544 BP | GO:2000544 regulation of | 3/1414  | 10/18903  | 0.033656989 | 0.0942541 | 0.06039979 | FGFR1/FGF2/FGF1         | 3                   | 0.3   |
| GO:0002371 BP | GO:0002371 dendritic     | 4/1414  | 17/18903  | 0.033804155 | 0.0942541 | 0.06039979 | PLCG2/CLEC7A/BST2/TLR4  | 4 0.235294117647059 |       |
| GO:0003198 BP | GO:0003198 epithelial to | 4/1414  | 17/18903  | 0.033804155 | 0.0942541 | 0.06039979 | RBPJ/SNAI1/ENG/TGFBR2   | 4 0.235294117647059 |       |
| GO:0009084 BP | GO:0009084 glutamine     | 4/1414  | 17/18903  | 0.033804155 | 0.0942541 | 0.06039979 | OAT/GLUL/GLUD1/ASS1     | 4 0.235294117647059 |       |
| GO:0032328 BP | GO:0032328 alanine       | 4/1414  | 17/18903  | 0.033804155 | 0.0942541 | 0.06039979 | SLC3A2/SLC6A6/SLC38A2/S | 4 0.235294117647059 |       |
| GO:0034134 BP | GO:0034134 toll-like     | 4/1414  | 17/18903  | 0.033804155 | 0.0942541 | 0.06039979 | LYN/TREM2/CYBA/TNFAIP3  | 4 0.235294117647059 |       |
| GO:0045198 BP | GO:0045198 establishment | 4/1414  | 17/18903  | 0.033804155 | 0.0942541 | 0.06039979 | CDC42/RHOA/MSN/FAT1     | 4 0.235294117647059 |       |
| GO:0048557 BP | GO:0048557 embryonic     | 4/1414  | 17/18903  | 0.033804155 | 0.0942541 | 0.06039979 | PDGFRA/GLI3/FGFR2/ID2   | 4 0.235294117647059 |       |
| GO:0061548 BP | GO:0061548 ganglion      | 4/1414  | 17/18903  | 0.033804155 | 0.0942541 | 0.06039979 | SIX1/NRP2/NRP1/CYP1B1   | 4 0.235294117647059 |       |
| GO:0070206 BP | GO:0070206 protein       | 4/1414  | 17/18903  | 0.033804155 | 0.0942541 | 0.06039979 | COL1A2/STEAP4/CD74/ALOX | 4 0.235294117647059 |       |
| GO:0071732 BP | GO:0071732 cellular      | 4/1414  | 17/18903  | 0.033804155 | 0.0942541 | 0.06039979 | AQP1/FOXO1/MMP3/CFLAR   | 4 0.235294117647059 |       |
| GO:0072378 BP | GO:0072378 blood         | 4/1414  | 17/18903  | 0.033804155 | 0.0942541 | 0.06039979 | FLNA/FN1/F13A1/THBD     | 4 0.235294117647059 |       |
| GO:0080154 BP | GO:0080154 regulation of | 4/1414  | 17/18903  | 0.033804155 | 0.0942541 | 0.06039979 | LHFPL2/MYH9/PLAT/PLCB1  | 4 0.235294117647059 |       |
| GO:0090083 BP | GO:0090083 regulation of | 4/1414  | 17/18903  | 0.033804155 | 0.0942541 | 0.06039979 | DNAJB1/HSPA1A/HSPA1B/DN | 4 0.235294117647059 |       |
| GO:0090594 BP | GO:0090594 inflammatory  | 4/1414  | 17/18903  | 0.033804155 | 0.0942541 | 0.06039979 | TGFB1/TLR4/HMOX1/GRN    | 4 0.235294117647059 |       |
| GO:0090713 BP | GO:0090713 immunological | 4/1414  | 17/18903  | 0.033804155 | 0.0942541 | 0.06039979 | HLA-DRB1/HLA-           | 4 0.235294117647059 |       |
| GO:0090288 BP | GO:0090288 negative      | 15/1414 | 120/18903 | 0.034176295 | 0.0952462 | 0.06103554 | NBL1/FBN1/HTRA1/SULF2/C | 15                  | 0.125 |
| GO:0019083 BP | GO:0019083 viral         | 8/1414  | 51/18903  | 0.034434925 | 0.0957839 | 0.06138012 | JUN/HEXIM1/ZFP36/GTF2B/ | 8 0.156862745098039 |       |
| GO:0045058 BP | GO:0045058 T cell        | 8/1414  | 51/18903  | 0.034434925 | 0.0957839 | 0.06138012 | GLI3/CTSL/CD74/PTPRC/CD | 8 0.156862745098039 |       |
| GO:0046580 BP | GO:0046580 negative      | 8/1414  | 51/18903  | 0.034434925 | 0.0957839 | 0.06138012 | SPRY2/RABGEF1/FBP1/BCL6 | 8 0.156862745098039 |       |
| GO:0051489 BP | GO:0051489 regulation of | 8/1414  | 51/18903  | 0.034434925 | 0.0957839 | 0.06138012 | CAPZB/DPYSL3/PIK3R1/NRP | 8 0.156862745098039 |       |
| GO:0070296 BP | GO:0070296 sarcoplasmic  | 7/1414  | 42/18903  | 0.034702896 | 0.0964833 | 0.06182830 | CALM2/GSTO1/NOL3/CCL3/S | 7 0.166666666666667 |       |
| GO:0019835 BP | GO:0019835 cytolysis     | 5/1414  | 25/18903  | 0.035145933 | 0.0971133 | 0.06223202 | PLA2G2A/TGFB1/LYZ/NINJ1 | 5                   | 0.2   |
| GO:0021801 BP | GO:0021801 cerebral      | 5/1414  | 25/18903  | 0.035145933 | 0.0971133 | 0.06223202 | COL3A1/GLI3/RTN4/SYNE2/ | 5                   | 0.2   |

|               |                          |         |           |             |           |            |                          |                      |        |
|---------------|--------------------------|---------|-----------|-------------|-----------|------------|--------------------------|----------------------|--------|
| GO:0022030 BP | GO:0022030 telencephalon | 5/1414  | 25/18903  | 0.035145933 | 0.0971133 | 0.06223202 | COL3A1/GLI3/RTN4/SYNE2/  | 5                    | 0.2    |
| GO:0032331 BP | GO:0032331 negative      | 5/1414  | 25/18903  | 0.035145933 | 0.0971133 | 0.06223202 | GLI3/EFEMP1/LTBP3/CHADL  | 5                    | 0.2    |
| GO:0032816 BP | GO:0032816 positive      | 5/1414  | 25/18903  | 0.035145933 | 0.0971133 | 0.06223202 | TYROBP/FCGR3A/IL18/HLA-  | 5                    | 0.2    |
| GO:0034114 BP | GO:0034114 regulation of | 5/1414  | 25/18903  | 0.035145933 | 0.0971133 | 0.06223202 | THY1/CD44/KLF4/MBP/WNK1  | 5                    | 0.2    |
| GO:0045932 BP | GO:0045932 negative      | 5/1414  | 25/18903  | 0.035145933 | 0.0971133 | 0.06223202 | KCNMA1/PTGS2/DOCK4/RGS2  | 5                    | 0.2    |
| GO:0045980 BP | GO:0045980 negative      | 5/1414  | 25/18903  | 0.035145933 | 0.0971133 | 0.06223202 | H19/NUPR1/DDIT4/PID1/FB  | 5                    | 0.2    |
| GO:0050860 BP | GO:0050860 negative      | 5/1414  | 25/18903  | 0.035145933 | 0.0971133 | 0.06223202 | THY1/LAPTM5/EZR/ELF1/PT  | 5                    | 0.2    |
| GO:0060396 BP | GO:0060396 growth        | 5/1414  | 25/18903  | 0.035145933 | 0.0971133 | 0.06223202 | PIK3R1/LYN/JAK1/PTK2/LE  | 5                    | 0.2    |
| GO:0071378 BP | GO:0071378 cellular      | 5/1414  | 25/18903  | 0.035145933 | 0.0971133 | 0.06223202 | PIK3R1/LYN/JAK1/PTK2/LE  | 5                    | 0.2    |
| GO:1901071 BP | GO:1901071 glucosamine-  | 5/1414  | 25/18903  | 0.035145933 | 0.0971133 | 0.06223202 | CHI3L1/CHST3/CHI3L2/PGM  | 5                    | 0.2    |
| GO:2000114 BP | GO:2000114 regulation of | 5/1414  | 25/18903  | 0.035145933 | 0.0971133 | 0.06223202 | GSN/SHTN1/RAP1B/ROCK1/C  | 5                    | 0.2    |
| GO:0062013 BP | GO:0062013 positive      | 18/1414 | 152/18903 | 0.035178671 | 0.0971577 | 0.06226049 | TWIST1/DAB2/FOXO1/NR1D1  | 18 0.118421052631579 |        |
| GO:0097306 BP | GO:0097306 cellular      | 13/1414 | 100/18903 | 0.035369314 | 0.0975918 | 0.06253868 | FOS/SOD2/INHBA/KLF2/CYB  | 13                   | 0.13   |
| GO:1901992 BP | GO:1901992 positive      | 13/1414 | 100/18903 | 0.035369314 | 0.0975918 | 0.06253868 | ANXA1/RGCC/CCND1/AIF1/R  | 13                   | 0.13   |
| GO:2001259 BP | GO:2001259 positive      | 11/1414 | 80/18903  | 0.035430548 | 0.0977146 | 0.06261733 | ANK3/PLCG2/CALM2/GSTO1/  | 11                   | 0.1375 |
| GO:1902850 BP | GO:1902850 microtubule   | 19/1414 | 163/18903 | 0.035785496 | 0.0986468 | 0.06321475 | GJA1/FLNA/HSPA1A/HSPA1B  | 19 0.116564417177914 |        |
| GO:1903900 BP | GO:1903900 regulation of | 17/1414 | 142/18903 | 0.036436484 | 0.1003939 | 0.06433431 | LGALS1/IFITM1/GSN/SLPI/  | 17 0.119718309859155 |        |
| GO:1905952 BP | GO:1905952 regulation of | 21/1414 | 185/18903 | 0.036510296 | 0.1005498 | 0.06443420 | DAB2/ABCA5/MAP2K6/NFKBI  | 21 0.113513513513514 |        |
| GO:0006956 BP | GO:0006956 complement    | 16/1414 | 132/18903 | 0.037645743 | 0.1036279 | 0.06640671 | C1R/CFH/CFB/C1S/A2M/CD5  | 16 0.121212121212121 |        |
| GO:0051057 BP | GO:0051057 positive      | 10/1414 | 71/18903  | 0.037845399 | 0.1041284 | 0.06672741 | COL3A1/PDGFRB/NOTCH2/CD  | 10 0.140845070422535 |        |
| GO:0042773 BP | GO:0042773 ATP synthesis | 13/1414 | 101/18903 | 0.037927333 | 0.1042554 | 0.06680885 | NDUFA4/NDUFB1/UQCR11/CO  | 13 0.128712871287129 |        |
| GO:0042775 BP | GO:0042775 mitochondrial | 13/1414 | 101/18903 | 0.037927333 | 0.1042554 | 0.06680885 | NDUFA4/NDUFB1/UQCR11/CO  | 13 0.128712871287129 |        |
| GO:0048013 BP | GO:0048013 ephrin        | 8/1414  | 52/18903  | 0.038130122 | 0.1045632 | 0.06700608 | MMP2/RBPJ/SIPAIL1/LYN/E  | 8 0.153846153846154  |        |
| GO:1902930 BP | GO:1902930 regulation of | 8/1414  | 52/18903  | 0.038130122 | 0.1045632 | 0.06700608 | DKK3/DAB2/BMP2/BMP6/FGF  | 8 0.153846153846154  |        |
| GO:0021799 BP | GO:0021799 cerebral      | 6/1414  | 34/18903  | 0.038254414 | 0.1045632 | 0.06700608 | COL3A1/GLI3/DIXDC1/RTN4  | 6 0.176470588235294  |        |
| GO:0035025 BP | GO:0035025 positive      | 6/1414  | 34/18903  | 0.038254414 | 0.1045632 | 0.06700608 | COL3A1/PDGFRB/LPAR1/LPA  | 6 0.176470588235294  |        |
| GO:0036336 BP | GO:0036336 dendritic     | 6/1414  | 34/18903  | 0.038254414 | 0.1045632 | 0.06700608 | GPR183/SP11/CXCR4/CDC42  | 6 0.176470588235294  |        |
| GO:0045648 BP | GO:0045648 positive      | 6/1414  | 34/18903  | 0.038254414 | 0.1045632 | 0.06700608 | HSPA1A/HSPA1B/ETS1/INHBA | 6 0.176470588235294  |        |
| GO:0061081 BP | GO:0061081 positive      | 6/1414  | 34/18903  | 0.038254414 | 0.1045632 | 0.06700608 | PLCG2/MAPKAPK2/CD74/LAP  | 6 0.176470588235294  |        |
| GO:0099174 BP | GO:0099174 regulation of | 6/1414  | 34/18903  | 0.038254414 | 0.1045632 | 0.06700608 | PTPRD/FARP1/GPC6/ARF6/V  | 6 0.176470588235294  |        |
| GO:0110110 BP | GO:0110110 positive      | 6/1414  | 34/18903  | 0.038254414 | 0.1045632 | 0.06700608 | SIX1/BMP2/FGF2/FGF1/CD3  | 6 0.176470588235294  |        |
| GO:1901797 BP | GO:1901797 negative      | 6/1414  | 34/18903  | 0.038254414 | 0.1045632 | 0.06700608 | TWIST1/SNAI1/CD44/NOP53  | 6 0.176470588235294  |        |
| GO:1905207 BP | GO:1905207 regulation of | 6/1414  | 34/18903  | 0.038254414 | 0.1045632 | 0.06700608 | BMP2/TGFB1/ARRB2/MEF2C/  | 6 0.176470588235294  |        |
| GO:1905606 BP | GO:1905606 regulation of | 6/1414  | 34/18903  | 0.038254414 | 0.1045632 | 0.06700608 | PTPRD/FARP1/GPC6/ARF6/V  | 6 0.176470588235294  |        |
| GO:0048525 BP | GO:0048525 negative      | 12/1414 | 91/18903  | 0.038318211 | 0.1045976 | 0.06702813 | HEXIM1/IFITM1/ZFP36/GSN  | 12 0.131868131868132 |        |
| GO:0106027 BP | GO:0106027 neuron        | 12/1414 | 91/18903  | 0.038318211 | 0.1045976 | 0.06702813 | SIPAIL1/FCGR2B/APOE/TRE  | 12 0.131868131868132 |        |

|               |                          |         |           |             |           |            |                         |                      |
|---------------|--------------------------|---------|-----------|-------------|-----------|------------|-------------------------|----------------------|
| GO:0006023 BP | GO:0006023 aminoglycan   | 11/1414 | 81/18903  | 0.038338733 | 0.1045976 | 0.06702813 | PDGFRB/DSEL/DSE/XYLT1/C | 11 0.135802469135802 |
| GO:0097061 BP | GO:0097061 dendritic     | 11/1414 | 81/18903  | 0.038338733 | 0.1045976 | 0.06702813 | SIPA1L1/FCGR2B/APOE/TRE | 11 0.135802469135802 |
| GO:0055123 BP | GO:0055123 digestive     | 17/1414 | 143/18903 | 0.038588655 | 0.1052303 | 0.06743353 | COL3A1/PDGFR/GLI3/HES1  | 17 0.118881118881119 |
| GO:0022904 BP | GO:0022904 respiratory   | 15/1414 | 122/18903 | 0.038775270 | 0.1056404 | 0.06769634 | NDUFA4/NDUFB1/UQCR11/CO | 15 0.122950819672131 |
| GO:1901989 BP | GO:1901989 positive      | 15/1414 | 122/18903 | 0.038775270 | 0.1056404 | 0.06769634 | PLCG2/ANXA1/RGCC/PPP1R1 | 15 0.122950819672131 |
| GO:0007595 BP | GO:0007595 lactation     | 7/1414  | 43/18903  | 0.038874674 | 0.1058124 | 0.06780655 | CDO1/SLC29A1/XBP1/CAV1/ | 7 0.162790697674419  |
| GO:0051602 BP | GO:0051602 response to   | 7/1414  | 43/18903  | 0.038874674 | 0.1058124 | 0.06780655 | MMP2/NR4A1/SOD2/BTG2/AI | 7 0.162790697674419  |
| GO:0034763 BP | GO:0034763 negative      | 18/1414 | 154/18903 | 0.039293659 | 0.1069029 | 0.06850539 | TWIST1/ANK3/GEM/OAZ1/CA | 18 0.116883116883117 |
| GO:0007052 BP | GO:0007052 mitotic       | 16/1414 | 133/18903 | 0.039945207 | 0.1086248 | 0.06960884 | FLNA/HSPA1A/HSPA1B/RAN/ | 16 0.120300751879699 |
| GO:0002820 BP | GO:0002820 negative      | 9/1414  | 62/18903  | 0.040128705 | 0.1089714 | 0.06983094 | CD55/PTPRC/AHR/FCGR2B/N | 9 0.145161290322581  |
| GO:0032387 BP | GO:0032387 negative      | 9/1414  | 62/18903  | 0.040128705 | 0.1089714 | 0.06983094 | CRYAB/APOD/TXN/INSIG1/S | 9 0.145161290322581  |
| GO:0060038 BP | GO:0060038 cardiac       | 9/1414  | 62/18903  | 0.040128705 | 0.1089714 | 0.06983094 | RBPJ/RUNX1/RBP4/FGF2/FG | 9 0.145161290322581  |
| GO:0001823 BP | GO:0001823 mesonephros   | 13/1414 | 102/18903 | 0.040613947 | 0.1098070 | 0.07036642 | SIX1/GLI3/HES1/ZBTB16/B | 13 0.127450980392157 |
| GO:0019218 BP | GO:0019218 regulation of | 13/1414 | 102/18903 | 0.040613947 | 0.1098070 | 0.07036642 | EGR1/DKK3/DAB2/IGFBP7/S | 13 0.127450980392157 |
| GO:0000027 BP | GO:0000027 ribosomal     | 5/1414  | 26/18903  | 0.040923989 | 0.1098070 | 0.07036642 | RPL23A/RPL38/NOP53/RPL1 | 5 0.192307692307692  |
| GO:0002433 BP | GO:0002433 immune        | 5/1414  | 26/18903  | 0.040923989 | 0.1098070 | 0.07036642 | PTPRC/FCGR2B/LYN/PTK2/F | 5 0.192307692307692  |
| GO:0032515 BP | GO:0032515 negative      | 5/1414  | 26/18903  | 0.040923989 | 0.1098070 | 0.07036642 | PPP1R15A/NCKAP1L/GNAI2/ | 5 0.192307692307692  |
| GO:0033598 BP | GO:0033598 mammary gland | 5/1414  | 26/18903  | 0.040923989 | 0.1098070 | 0.07036642 | CEBPB/ID2/CCND1/BAX/RTN | 5 0.192307692307692  |
| GO:0038096 BP | GO:0038096 Fc-gamma      | 5/1414  | 26/18903  | 0.040923989 | 0.1098070 | 0.07036642 | PTPRC/FCGR2B/LYN/PTK2/F | 5 0.192307692307692  |
| GO:0044346 BP | GO:0044346 fibroblast    | 5/1414  | 26/18903  | 0.040923989 | 0.1098070 | 0.07036642 | NUPR1/STK17A/STK17B/GAS | 5 0.192307692307692  |
| GO:0045672 BP | GO:0045672 positive      | 5/1414  | 26/18903  | 0.040923989 | 0.1098070 | 0.07036642 | FOS/KLF10/NOTCH2/TYROBP | 5 0.192307692307692  |
| GO:0048596 BP | GO:0048596 embryonic     | 5/1414  | 26/18903  | 0.040923989 | 0.1098070 | 0.07036642 | TWIST1/ZEB1/CITED2/HIPK | 5 0.192307692307692  |
| GO:0060314 BP | GO:0060314 regulation of | 5/1414  | 26/18903  | 0.040923989 | 0.1098070 | 0.07036642 | CALM2/GSTO1/CALM3/FKBP1 | 5 0.192307692307692  |
| GO:0060333 BP | GO:0060333 interferon-   | 5/1414  | 26/18903  | 0.040923989 | 0.1098070 | 0.07036642 | IFNGR2/IFNGR1/SP100/JAK | 5 0.192307692307692  |
| GO:0060384 BP | GO:0060384 innervation   | 5/1414  | 26/18903  | 0.040923989 | 0.1098070 | 0.07036642 | SULF2/VCAM1/SERPINE2/NR | 5 0.192307692307692  |
| GO:1903901 BP | GO:1903901 negative      | 5/1414  | 26/18903  | 0.040923989 | 0.1098070 | 0.07036642 | IFITM1/GSN/IFITM2/BST2/ | 5 0.192307692307692  |
| GO:1904753 BP | GO:1904753 negative      | 5/1414  | 26/18903  | 0.040923989 | 0.1098070 | 0.07036642 | TPM1/MEF2C/GNA13/RHOA/N | 5 0.192307692307692  |
| GO:1905048 BP | GO:1905048 regulation of | 5/1414  | 26/18903  | 0.040923989 | 0.1098070 | 0.07036642 | ANTXR1/TIMP2/MBP/PICALM | 5 0.192307692307692  |
| GO:2000050 BP | GO:2000050 regulation of | 5/1414  | 26/18903  | 0.040923989 | 0.1098070 | 0.07036642 | DAB2/PLEKHA4/RNF213/NPH | 5 0.192307692307692  |
| GO:0002693 BP | GO:0002693 positive      | 4/1414  | 18/18903  | 0.040963521 | 0.1098070 | 0.07036642 | THY1/CD99/ICAM1/PLVAP   | 4 0.222222222222222  |
| GO:0006957 BP | GO:0006957 complement    | 4/1414  | 18/18903  | 0.040963521 | 0.1098070 | 0.07036642 | CFH/CFB/CFD/VSIG4       | 4 0.222222222222222  |
| GO:0006978 BP | GO:0006978 DNA damage    | 4/1414  | 18/18903  | 0.040963521 | 0.1098070 | 0.07036642 | CDKN1A/RPS27L/SP100/RPL | 4 0.222222222222222  |
| GO:0009125 BP | GO:0009125 nucleoside    | 4/1414  | 18/18903  | 0.040963521 | 0.1098070 | 0.07036642 | NT5E/TYMP/PNP/UPP1      | 4 0.222222222222222  |
| GO:0032354 BP | GO:0032354 response to   | 4/1414  | 18/18903  | 0.040963521 | 0.1098070 | 0.07036642 | INHBA/TGFBR3/CYP1B1/PLA | 4 0.222222222222222  |
| GO:0043116 BP | GO:0043116 negative      | 4/1414  | 18/18903  | 0.040963521 | 0.1098070 | 0.07036642 | VEGFA/ADM/RAMP2/CLDN5   | 4 0.222222222222222  |
| GO:0043217 BP | GO:0043217 myelin        | 4/1414  | 18/18903  | 0.040963521 | 0.1098070 | 0.07036642 | NDRG1/CXCR4/EPB41L3/PLE | 4 0.222222222222222  |

|               |                          |         |           |             |           |            |                         |                      |
|---------------|--------------------------|---------|-----------|-------------|-----------|------------|-------------------------|----------------------|
| GO:0048486 BP | GO:0048486 parasympathet | 4/1414  | 18/18903  | 0.040963521 | 0.1098070 | 0.07036642 | SIX1/HES1/NRP2/NRP1     | 4 0.222222222222222  |
| GO:0050665 BP | GO:0050665 hydrogen      | 4/1414  | 18/18903  | 0.040963521 | 0.1098070 | 0.07036642 | SOD2/CYBB/CYBA/FYN      | 4 0.222222222222222  |
| GO:0071786 BP | GO:0071786 endoplasmic   | 4/1414  | 18/18903  | 0.040963521 | 0.1098070 | 0.07036642 | RTN3/RAB10/RTN4/ARL6IP1 | 4 0.222222222222222  |
| GO:0090520 BP | GO:0090520 sphingolipid  | 4/1414  | 18/18903  | 0.040963521 | 0.1098070 | 0.07036642 | RAC1/EZR/S1PR1/PLPP3    | 4 0.222222222222222  |
| GO:0060996 BP | GO:0060996 dendritic     | 12/1414 | 92/18903  | 0.041190775 | 0.1103655 | 0.07072429 | LPAR1/ARF4/SIPA1L1/APOE | 12 0.130434782608696 |
| GO:0010770 BP | GO:0010770 positive      | 11/1414 | 82/18903  | 0.041409213 | 0.1108489 | 0.07103409 | DAB2/PTPRD/FLNA/NRP1/AR | 11 0.134146341463415 |
| GO:0042509 BP | GO:0042509 regulation of | 11/1414 | 82/18903  | 0.041409213 | 0.1108489 | 0.07103409 | SOCS3/HES1/CAV1/FGFR3/C | 11 0.134146341463415 |
| GO:0070507 BP | GO:0070507 regulation of | 18/1414 | 155/18903 | 0.041477505 | 0.1109808 | 0.07111860 | HSPA1A/HSPA1B/TRPV4/CHM | 18 0.116129032258065 |
| GO:0009914 BP | GO:0009914 hormone       | 31/1414 | 300/18903 | 0.042051140 | 0.1124641 | 0.07206911 | GJA1/AQP1/SOX4/DAB2/FOX | 31 0.103333333333333 |
| GO:0097300 BP | GO:0097300 programmed    | 8/1414  | 53/18903  | 0.042081649 | 0.1124941 | 0.07208834 | CFLAR/NUPR1/PELI1/BIRC2 | 8 0.150943396226415  |
| GO:0006939 BP | GO:0006939 smooth muscle | 14/1414 | 113/18903 | 0.042414690 | 0.1133325 | 0.07262558 | COMP/SULF2/KCNMA1/PTGS2 | 14 0.123893805309735 |
| GO:0031128 BP | GO:0031128 developmental | 6/1414  | 35/18903  | 0.043356262 | 0.1148718 | 0.07361200 | SIX1/BMP2/FGF2/FGF1/HIP | 6 0.171428571428571  |
| GO:0071398 BP | GO:0071398 cellular      | 6/1414  | 35/18903  | 0.043356262 | 0.1148718 | 0.07361200 | ID3/HES1/PID1/ASS1/PLCB | 6 0.171428571428571  |
| GO:0090075 BP | GO:0090075 relaxation of | 6/1414  | 35/18903  | 0.043356262 | 0.1148718 | 0.07361200 | GSN/KCNMA1/PDE4B/ATP1B1 | 6 0.171428571428571  |
| GO:1903539 BP | GO:1903539 protein       | 6/1414  | 35/18903  | 0.043356262 | 0.1148718 | 0.07361200 | GPC6/ADAM10/RAP1A/VPS35 | 6 0.171428571428571  |
| GO:0042181 BP | GO:0042181 ketone        | 7/1414  | 44/18903  | 0.043361262 | 0.1148718 | 0.07361200 | EGR1/DKK3/DAB2/BMP2/BMP | 7 0.159090909090909  |
| GO:0046640 BP | GO:0046640 regulation of | 7/1414  | 44/18903  | 0.043361262 | 0.1148718 | 0.07361200 | CD55/PTPRC/IL18/HLA-    | 7 0.159090909090909  |
| GO:0042472 BP | GO:0042472 inner ear     | 13/1414 | 103/18903 | 0.043431884 | 0.1148718 | 0.07361200 | MAFB/SIX1/PRRX1/ZEB1/NT | 13 0.12621359223301  |
| GO:0002158 BP | GO:0002158 osteoclast    | 3/1414  | 11/18903  | 0.043760887 | 0.1148718 | 0.07361200 | JUNB/NMB/TNFAIP3        | 3 0.272727272727273  |
| GO:0010917 BP | GO:0010917 negative      | 3/1414  | 11/18903  | 0.043760887 | 0.1148718 | 0.07361200 | PRELID1/PMAIP1/BAX      | 3 0.272727272727273  |
| GO:0021903 BP | GO:0021903 rostrocaudal  | 3/1414  | 11/18903  | 0.043760887 | 0.1148718 | 0.07361200 | HES1/ATP6AP2/SOX17      | 3 0.272727272727273  |
| GO:0030320 BP | GO:0030320 cellular      | 3/1414  | 11/18903  | 0.043760887 | 0.1148718 | 0.07361200 | TBXAS1/SLC12A2/WNK1     | 3 0.272727272727273  |
| GO:0030644 BP | GO:0030644 cellular      | 3/1414  | 11/18903  | 0.043760887 | 0.1148718 | 0.07361200 | TBXAS1/SLC12A2/WNK1     | 3 0.272727272727273  |
| GO:0033625 BP | GO:0033625 positive      | 3/1414  | 11/18903  | 0.043760887 | 0.1148718 | 0.07361200 | PIEZ01/PLEK/RAP1B       | 3 0.272727272727273  |
| GO:0033860 BP | GO:0033860 regulation of | 3/1414  | 11/18903  | 0.043760887 | 0.1148718 | 0.07361200 | CYBA/GNAI2/GNAI3        | 3 0.272727272727273  |
| GO:0034115 BP | GO:0034115 negative      | 3/1414  | 11/18903  | 0.043760887 | 0.1148718 | 0.07361200 | KLF4/MBP/WNK1           | 3 0.272727272727273  |
| GO:0035581 BP | GO:0035581 sequestering  | 3/1414  | 11/18903  | 0.043760887 | 0.1148718 | 0.07361200 | NBL1/LTBP1/FBN1         | 3 0.272727272727273  |
| GO:0035766 BP | GO:0035766 cell          | 3/1414  | 11/18903  | 0.043760887 | 0.1148718 | 0.07361200 | FGFR1/FGF2/FGF1         | 3 0.272727272727273  |
| GO:0044557 BP | GO:0044557 relaxation of | 3/1414  | 11/18903  | 0.043760887 | 0.1148718 | 0.07361200 | KCNMA1/SLC8A1/RGS2      | 3 0.272727272727273  |
| GO:0044857 BP | GO:0044857 plasma        | 3/1414  | 11/18903  | 0.043760887 | 0.1148718 | 0.07361200 | CAV1/COLEC12/CAV2       | 3 0.272727272727273  |
| GO:0045837 BP | GO:0045837 negative      | 3/1414  | 11/18903  | 0.043760887 | 0.1148718 | 0.07361200 | PRELID1/PMAIP1/BAX      | 3 0.272727272727273  |
| GO:0046643 BP | GO:0046643 regulation of | 3/1414  | 11/18903  | 0.043760887 | 0.1148718 | 0.07361200 | SOX4/PTPRC/NCKAP1L      | 3 0.272727272727273  |
| GO:0048251 BP | GO:0048251 elastic fiber | 3/1414  | 11/18903  | 0.043760887 | 0.1148718 | 0.07361200 | COL3A1/TNXB/LTBP3       | 3 0.272727272727273  |
| GO:0051386 BP | GO:0051386 regulation of | 3/1414  | 11/18903  | 0.043760887 | 0.1148718 | 0.07361200 | SPRY2/CYFIP1/SPRY1      | 3 0.272727272727273  |
| GO:0061299 BP | GO:0061299 retina        | 3/1414  | 11/18903  | 0.043760887 | 0.1148718 | 0.07361200 | NRP1/CYP1B1/COL4A1      | 3 0.272727272727273  |
| GO:0070587 BP | GO:0070587 regulation of | 3/1414  | 11/18903  | 0.043760887 | 0.1148718 | 0.07361200 | KLF4/MBP/WNK1           | 3 0.272727272727273  |

|               |                                      |         |           |             |           |            |                         |                       |
|---------------|--------------------------------------|---------|-----------|-------------|-----------|------------|-------------------------|-----------------------|
| GO:0070934 BP | GO:0070934 CRD-mediated              | 3/1414  | 11/18903  | 0.043760887 | 0.1148718 | 0.07361200 | PABPC1/YBX1/HNRNPU      | 3 0.272727272727273   |
| GO:0071609 BP | GO:0071609 chemokine (C-             | 3/1414  | 11/18903  | 0.043760887 | 0.1148718 | 0.07361200 | TRPV4/SIRPA/DDX3X       | 3 0.272727272727273   |
| GO:0071649 BP | GO:0071649 regulation of             | 3/1414  | 11/18903  | 0.043760887 | 0.1148718 | 0.07361200 | TRPV4/SIRPA/DDX3X       | 3 0.272727272727273   |
| GO:0072124 BP | GO:0072124 regulation of             | 3/1414  | 11/18903  | 0.043760887 | 0.1148718 | 0.07361200 | EGR1/CFLAR/PDGFB        | 3 0.272727272727273   |
| GO:0072697 BP | GO:0072697 protein                   | 3/1414  | 11/18903  | 0.043760887 | 0.1148718 | 0.07361200 | EPB41L2/EZR/NUMA1       | 3 0.272727272727273   |
| GO:0097250 BP | GO:0097250 mitochondrial             | 3/1414  | 11/18903  | 0.043760887 | 0.1148718 | 0.07361200 | COX7A1/HIGD1A/HIGD2A    | 3 0.272727272727273   |
| GO:0097278 BP | GO:0097278 complement-               | 3/1414  | 11/18903  | 0.043760887 | 0.1148718 | 0.07361200 | CFH/CD55/CD59           | 3 0.272727272727273   |
| GO:1901731 BP | GO:1901731 positive                  | 3/1414  | 11/18903  | 0.043760887 | 0.1148718 | 0.07361200 | PDPN/EMILIN2/IL6ST      | 3 0.272727272727273   |
| GO:1904238 BP | GO:1904238 pericyte cell             | 3/1414  | 11/18903  | 0.043760887 | 0.1148718 | 0.07361200 | SPI1/CD34/PDGFB         | 3 0.272727272727273   |
| GO:1904847 BP | GO:1904847 regulation of             | 3/1414  | 11/18903  | 0.043760887 | 0.1148718 | 0.07361200 | FGFR1/FGF2/FGF1         | 3 0.272727272727273   |
| GO:1905668 BP | GO:1905668 positive                  | 3/1414  | 11/18903  | 0.043760887 | 0.1148718 | 0.07361200 | EZR/MSN/RDX             | 3 0.272727272727273   |
| GO:2000644 BP | GO:2000644 regulation of             | 3/1414  | 11/18903  | 0.043760887 | 0.1148718 | 0.07361200 | ANXA2/LAPTM5/APOE       | 3 0.272727272727273   |
| GO:2000833 BP | GO:2000833 positive                  | 3/1414  | 11/18903  | 0.043760887 | 0.1148718 | 0.07361200 | DAB2/SPP1/BMP6          | 3 0.272727272727273   |
| GO:2001204 BP | GO:2001204 regulation of             | 3/1414  | 11/18903  | 0.043760887 | 0.1148718 | 0.07361200 | FBN1/NOTCH2/TYROBP      | 3 0.272727272727273   |
| GO:0042471 BP | GO:0042471 ear                       | 15/1414 | 124/18903 | 0.043802040 | 0.1148718 | 0.07361200 | MAFB/TWIST1/SIX1/PRRX1/ | 15 0.120967741935484  |
| GO:0010573 BP | GO:0010573 vascular                  | 9/1414  | 63/18903  | 0.043837594 | 0.1148718 | 0.07361200 | SULF2/NDRG2/TGFB1/PTGS2 | 9 0.142857142857143   |
| GO:0021885 BP | GO:0021885 forebrain                 | 9/1414  | 63/18903  | 0.043837594 | 0.1148718 | 0.07361200 | COL3A1/GLI3/DIXDC1/CXCR | 9 0.142857142857143   |
| GO:0070059 BP | GO:0070059 intrinsic                 | 9/1414  | 63/18903  | 0.043837594 | 0.1148718 | 0.07361200 | HSPA1A/DDIT3/SELENOK/XB | 9 0.142857142857143   |
| GO:0019646 BP | GO:0019646 aerobic                   | 12/1414 | 93/18903  | 0.044210272 | 0.1157963 | 0.07420446 | NDUFA4/NDUFB1/UQCR11/CO | 12 0.129032258064516  |
| GO:0031331 BP | GO:0031331 positive<br>regulation of | 42/1414 | 429/18903 | 0.044346144 | 0.1161001 | 0.07439911 | ZFP36L1/TWIST1/DAB2/KCN | 42 0.0979020979020979 |
| GO:0042246 BP | GO:0042246 tissue                    | 10/1414 | 73/18903  | 0.044590949 | 0.1165840 | 0.07470922 | Q10T1/FOXO1/TNRC6A/HSPA | 10 0.136986301369863  |
| GO:0045665 BP | GO:0045665 negative                  | 10/1414 | 73/18903  | 0.044590949 | 0.1165840 | 0.07470922 | RUNX1/PTN/APOD/CFLAR/CD | 10 0.136986301369863  |
| GO:1904888 BP | GO:1904888 cranial                   | 10/1414 | 73/18903  | 0.044590949 | 0.1165840 | 0.07470922 | ID4/GLI3/HES1/EIF4E/DIX | 10 0.136986301369863  |
| GO:0014032 BP | GO:0014032 neural crest              | 11/1414 | 83/18903  | 0.044645472 | 0.1166220 | 0.07473357 | PDGFRA/TWIST1/SIX1/PRRX | 10 0.136986301369863  |
| GO:0061912 BP | GO:0061912 selective                 | 11/1414 | 83/18903  | 0.044645472 | 0.1166220 | 0.07473357 | TWIST1/SEMA3C/HES1/NRP2 | 11 0.132530120481928  |
| GO:1900180 BP | GO:1900180 regulation of             | 16/1414 | 135/18903 | 0.044843842 | 0.1170877 | 0.07503203 | RETREG1/MAP1LC3B/SQSTM1 | 11 0.132530120481928  |
| GO:0050768 BP | GO:0050768 negative                  | 17/1414 | 146/18903 | 0.045596278 | 0.1189991 | 0.07625686 | LMNA/FLNA/GLI3/APOD/PIK | 16 0.118518518518519  |
| GO:0031113 BP | GO:0031113 regulation of             | 8/1414  | 54/18903  | 0.046294904 | 0.1207684 | 0.07739064 | THY1/SEMA3C/ID4/NTN1/HE | 17 0.116438356164384  |
| GO:0002092 BP | GO:0002092 positive                  | 5/1414  | 27/18903  | 0.047242905 | 0.1230213 | 0.07883437 | HSPA1A/HSPA1B/RPS3/RAC1 | 8 0.148148148148148   |
| GO:0002407 BP | GO:0002407 dendritic                 | 5/1414  | 27/18903  | 0.047242905 | 0.1230213 | 0.07883437 | PLCG2/MAGI2/VEGFA/ARRB2 | 5 0.185185185185185   |
| GO:0030325 BP | GO:0030325 adrenal gland             | 5/1414  | 27/18903  | 0.047242905 | 0.1230213 | 0.07883437 | GPR183/SPI1/CXCR4/GAS6/ | 5 0.185185185185185   |
| GO:0090200 BP | GO:0090200 positive                  | 5/1414  | 27/18903  | 0.047242905 | 0.1230213 | 0.07883437 | PDGFRA/DKK3/ARID5B/CITE | 5 0.185185185185185   |
| GO:1900542 BP | GO:1900542 regulation of             | 12/1414 | 94/18903  | 0.047379574 | 0.1233222 | 0.07902715 | PLAUR/PYCARD/PMAIP1/BAX | 5 0.185185185185185   |
| GO:0043401 BP | GO:0043401 steroid                   | 16/1414 | 136/18903 | 0.047446742 | 0.1233319 | 0.07903339 | H19/NUPRI/DDIT4/ENO1/PI | 12 0.127659574468085  |
| GO:0071333 BP | GO:0071333 cellular                  | 16/1414 | 136/18903 | 0.047446742 | 0.1233319 | 0.07903339 | FOXP1/DAB2/LBH/DNAJA1/N | 16 0.117647058823529  |
|               |                                      |         |           |             |           |            | SOX4/SLC29A1/PIM3/SLC39 | 16 0.117647058823529  |

|               |                          |         |           |             |           |            |                         |    |                    |
|---------------|--------------------------|---------|-----------|-------------|-----------|------------|-------------------------|----|--------------------|
| GO:1903052 BP | GO:1903052 positive      | 16/1414 | 136/18903 | 0.047446742 | 0.1233319 | 0.07903339 | DAB2/HSPA1A/HSPA1B/NUPR | 16 | 0.117647058823529  |
| GO:0048524 BP | GO:0048524 positive      | 9/1414  | 64/18903  | 0.047769134 | 0.1241146 | 0.07953496 | LGALS1/HLA-             | 9  | 0.140625           |
| GO:0035050 BP | GO:0035050 embryonic     | 11/1414 | 84/18903  | 0.048050747 | 0.1247907 | 0.07996822 | NOTCH2/HES1/CITED2/MEF2 | 11 | 0.130952380952381  |
| GO:0008631 BP | GO:0008631 intrinsic     | 7/1414  | 45/18903  | 0.048168680 | 0.1249212 | 0.08005186 | SOD2/HSPB1/NOL3/TREM2/M | 7  | 0.1555555555555556 |
| GO:0031295 BP | GO:0031295 T cell        | 7/1414  | 45/18903  | 0.048168680 | 0.1249212 | 0.08005186 | LGALS1/CAV1/LYN/CD86/MA | 7  | 0.1555555555555556 |
| GO:1901021 BP | GO:1901021 positive      | 7/1414  | 45/18903  | 0.048168680 | 0.1249212 | 0.08005186 | VMP1/PLCG2/CALM2/GSTO1/ | 7  | 0.1555555555555556 |
| GO:0017157 BP | GO:0017157 regulation of | 23/1414 | 213/18903 | 0.048242097 | 0.1249212 | 0.08005186 | SDCBP/SDC4/ANXA2/ANXA1/ | 23 | 0.107981220657277  |
| GO:0001736 BP | GO:0001736 establishment | 10/1414 | 74/18903  | 0.048250920 | 0.1249212 | 0.08005186 | DAB2/CTHRC1/GPC6/MAG12/ | 10 | 0.135135135135135  |
| GO:0007164 BP | GO:0007164 establishment | 10/1414 | 74/18903  | 0.048250920 | 0.1249212 | 0.08005186 | DAB2/CTHRC1/GPC6/MAG12/ | 10 | 0.135135135135135  |
| GO:2000573 BP | GO:2000573 positive      | 10/1414 | 74/18903  | 0.048250920 | 0.1249212 | 0.08005186 | PDGFRB/SMOC2/FGF2/RGCC/ | 10 | 0.135135135135135  |
| GO:0001678 BP | GO:0001678 cellular      | 18/1414 | 158/18903 | 0.048553448 | 0.1251365 | 0.08018984 | SOX4/FOXO1/SLC29A1/PIM3 | 18 | 0.113924050632911  |
| GO:0051607 BP | GO:0051607 defense       | 31/1414 | 304/18903 | 0.048749491 | 0.1251365 | 0.08018984 | HTRA1/IFITM1/IFITM2/SEL | 31 | 0.101973684210526  |
| GO:0033280 BP | GO:0033280 response to   | 6/1414  | 36/18903  | 0.048864247 | 0.1251365 | 0.08018984 | STC2/SPP1/PTGS2/ATP2B1/ | 6  | 0.1666666666666667 |
| GO:0033687 BP | GO:0033687 osteoblast    | 6/1414  | 36/18903  | 0.048864247 | 0.1251365 | 0.08018984 | JUNB/CTHRC1/BMP2/FGFR2/ | 6  | 0.1666666666666667 |
| GO:0045777 BP | GO:0045777 positive      | 6/1414  | 36/18903  | 0.048864247 | 0.1251365 | 0.08018984 | TPM1/ID2/CYBA/RHOA/NR2F | 6  | 0.1666666666666667 |
| GO:0048261 BP | GO:0048261 negative      | 6/1414  | 36/18903  | 0.048864247 | 0.1251365 | 0.08018984 | SDCBP/ANXA2/RABGEF1/RAC | 6  | 0.1666666666666667 |
| GO:0062237 BP | GO:0062237 protein       | 6/1414  | 36/18903  | 0.048864247 | 0.1251365 | 0.08018984 | GPC6/ADAM10/RAP1A/VPS35 | 6  | 0.1666666666666667 |
| GO:0001502 BP | GO:0001502 cartilage     | 4/1414  | 19/18903  | 0.048913318 | 0.1251365 | 0.08018984 | SOX5/COL2A1/COL11A1/PKD | 4  | 0.210526315789474  |
| GO:0002281 BP | GO:0002281 macrophage    | 4/1414  | 19/18903  | 0.048913318 | 0.1251365 | 0.08018984 | PLCG2/TYROBP/TREM2/GRN  | 4  | 0.210526315789474  |
| GO:0002544 BP | GO:0002544 chronic       | 4/1414  | 19/18903  | 0.048913318 | 0.1251365 | 0.08018984 | VCAM1/THBS1/CCL5/TNFAIP | 4  | 0.210526315789474  |
| GO:0002923 BP | GO:0002923 regulation of | 4/1414  | 19/18903  | 0.048913318 | 0.1251365 | 0.08018984 | CD55/PTPRC/FCGR2B/TREM2 | 4  | 0.210526315789474  |
| GO:0009226 BP | GO:0009226 nucleotide-   | 4/1414  | 19/18903  | 0.048913318 | 0.1251365 | 0.08018984 | UGDH/PGM3/NANS/UAP1     | 4  | 0.210526315789474  |
| GO:0010744 BP | GO:0010744 positive      | 4/1414  | 19/18903  | 0.048913318 | 0.1251365 | 0.08018984 | PLA2G2A/MSR1/IL18/PRKCH | 4  | 0.210526315789474  |
| GO:0014067 BP | GO:0014067 negative      | 4/1414  | 19/18903  | 0.048913318 | 0.1251365 | 0.08018984 | TWIST1/SERPINE2/NOP53/T | 4  | 0.210526315789474  |
| GO:0030889 BP | GO:0030889 negative      | 4/1414  | 19/18903  | 0.048913318 | 0.1251365 | 0.08018984 | TYROBP/MNDA/FCGR2B/LYN  | 4  | 0.210526315789474  |
| GO:0042772 BP | GO:0042772 DNA damage    | 4/1414  | 19/18903  | 0.048913318 | 0.1251365 | 0.08018984 | CDKN1A/RPS27L/SP100/RPL | 4  | 0.210526315789474  |
| GO:0043652 BP | GO:0043652 engulfment of | 4/1414  | 19/18903  | 0.048913318 | 0.1251365 | 0.08018984 | TREM2/RHOG/RAC1/THBS1   | 4  | 0.210526315789474  |
| GO:0045953 BP | GO:0045953 negative      | 4/1414  | 19/18903  | 0.048913318 | 0.1251365 | 0.08018984 | ARRB2/HLA-B/HLA-E/HLA-A | 4  | 0.210526315789474  |
| GO:0048245 BP | GO:0048245 eosinophil    | 4/1414  | 19/18903  | 0.048913318 | 0.1251365 | 0.08018984 | CCL3/CCL2/CCL4/CCL5     | 4  | 0.210526315789474  |
| GO:0055003 BP | GO:0055003 cardiac       | 4/1414  | 19/18903  | 0.048913318 | 0.1251365 | 0.08018984 | PDGFRA/PDGFRB/NEBL/MEF2 | 4  | 0.210526315789474  |
| GO:0060216 BP | GO:0060216 definitive    | 4/1414  | 19/18903  | 0.048913318 | 0.1251365 | 0.08018984 | ZFP36L2/TGFBR3/HIPK1/TE | 4  | 0.210526315789474  |
| GO:0097202 BP | GO:0097202 activation of | 4/1414  | 19/18903  | 0.048913318 | 0.1251365 | 0.08018984 | CYCS/PYCARD/LGMN/IFI16  | 4  | 0.210526315789474  |
| GO:0097494 BP | GO:0097494 regulation of | 4/1414  | 19/18903  | 0.048913318 | 0.1251365 | 0.08018984 | BLOC1S1/PICALM/RAB11A/C | 4  | 0.210526315789474  |
| GO:1901659 BP | GO:1901659 glycosyl      | 4/1414  | 19/18903  | 0.048913318 | 0.1251365 | 0.08018984 | NT5E/PNP/ADK/APRT       | 4  | 0.210526315789474  |
| GO:1902170 BP | GO:1902170 cellular      | 4/1414  | 19/18903  | 0.048913318 | 0.1251365 | 0.08018984 | AQP1/FOXO1/MMP3/CFLAR   | 4  | 0.210526315789474  |
| GO:1902176 BP | GO:1902176 negative      | 4/1414  | 19/18903  | 0.048913318 | 0.1251365 | 0.08018984 | SOD2/HSPB1/NOL3/NFE2L2  | 4  | 0.210526315789474  |

|               |                                                     |          |           |                          |                          |                          |                                                                                                          |     |                   |
|---------------|-----------------------------------------------------|----------|-----------|--------------------------|--------------------------|--------------------------|----------------------------------------------------------------------------------------------------------|-----|-------------------|
| GO:2000251 BP | GO:2000251 positive                                 | 4/1414   | 19/18903  | 0.048913318              | 0.1251365                | 0.08018984               | HCLS1/NRP1/CDC42/TEK                                                                                     | 4   | 0.210526315789474 |
| GO:0032479 BP | GO:0032479 regulation of                            | 13/1414  | 105/18903 | 0.049471916              | 0.1264547                | 0.08103453               | PLCG2/NMB/HSP90AA1/HSPD                                                                                  | 13  | 0.123809523809524 |
| GO:0032606 BP | GO:0032606 type I                                   | 13/1414  | 105/18903 | 0.049471916              | 0.1264547                | 0.08103453               | PLCG2/NMB/HSP90AA1/HSPD                                                                                  | 13  | 0.123809523809524 |
| GO:0005925 CC | GO:0005925 focal adhesion                           | 135/1454 | 422/19869 | 9.545946062<br>66903e-52 | 6.2621406<br>1711088e-49 | 4.40118355<br>310425e-49 | TNC/GJA1/MARCKS/THY1/MR<br>C2/EPB41L2/TPM4/ITGA11/<br>PDGFRB/ENAH/ITGB5/DAB2/<br>LIMA1/ACTG1/CD99/ACTB/F | 135 | 0.319905213270142 |
| GO:0030055 CC | GO:0030055 cell-substrate junction                  | 136/1454 | 432/19869 | 3.358256090<br>10307e-51 | 1.1015079<br>9755381e-48 | 7.74166403<br>929023e-49 | TNC/GJA1/MARCKS/THY1/MR<br>C2/EPB41L2/TPM4/ITGA11/<br>PDGFRB/ENAH/ITGB5/DAB2/<br>LIMA1/ACTG1/CD99/ACTB/F | 136 | 0.314814814814815 |
| GO:0062023 CC | GO:0062023 collagen-containing extracellular matrix | 128/1454 | 433/19869 | 8.010452158<br>49353e-45 | 1.7516188<br>7199059e-42 | 1.23108001<br>59369e-42  | COL1A1/MMP2/COL1A2/TNC/<br>TGFB1/THBS2/COL14A1/COL<br>12A1/COL5A1/COL6A3/COL5<br>A2/COL3A1/LTBP2/S100A4/ | 128 | 0.295612009237875 |
| GO:0005788 CC | GO:0005788 endoplasmic reticulum                    | 80/1454  | 312/19869 | 8.285980667<br>02927e-24 | 1.3589008<br>293928e-    | 9.55068297<br>936532e-22 | COL1A1/COL1A2/TNC/COL14<br>A1/COL12A1/COL5A1/COL6A                                                       | 80  | 0.256410256410256 |
| GO:0034774 CC | GO:0034774 secretory granule lumen                  | 81/1454  | 322/19869 | 1.658815737<br>66208e-23 | 2.1763662<br>4781264e-   | 1.52960272<br>230735e-21 | ECM1/TUBB/NPC2/TIMP2/AC<br>TN1/CHI3L1/ISLR/PRDX4/T                                                       | 81  | 0.251552795031056 |
| GO:0060205 CC | GO:0060205 cytoplasmic vesicle lumen                | 81/1454  | 325/19869 | 3.171559701<br>00904e-23 | 3.4675719<br>3976989e-   | 2.43709324<br>393327e-21 | ECM1/TUBB/NPC2/TIMP2/AC<br>TN1/CHI3L1/ISLR/PRDX4/T                                                       | 81  | 0.249230769230769 |
| GO:0031983 CC | GO:0031983 vesicle lumen                            | 81/1454  | 327/19869 | 4.860736703<br>23184e-23 | 4.5552046<br>8188584e-   | 3.20150778<br>348202e-21 | ECM1/TUBB/NPC2/TIMP2/AC<br>TN1/CHI3L1/ISLR/PRDX4/T                                                       | 81  | 0.247706422018349 |
| GO:0022626 CC | GO:0022626 cytosolic ribosome                       | 44/1454  | 105/19869 | 5.783215872<br>6134e-23  | 4.7422370<br>1554299e-   | 3.33295862<br>132193e-21 | RPS26/RPS21/RPS15A/RPL3<br>9/APOD/RPS4Y1/RPL36AL/R                                                       | 44  | 0.419047619047619 |
| GO:0031252 CC | GO:0031252 cell leading edge                        | 91/1454  | 421/19869 | 2.673962010<br>64202e-21 | 1.9490211<br>9886796e-19 | 1.36981913<br>527626e-19 | THY1/ANTXR1/CAPZB/ENAH/<br>LIMA1/WIPF1/ACTB/TPM1/D<br>PYSL3/ACTN1/FAP/PIEZO1/                            | 91  | 0.216152019002375 |
| GO:0005775 CC | GO:0005775 vacuolar lumen                           | 51/1454  | 176/19869 | 4.429220837<br>53896e-18 | 2.7845103<br>40676e-16   | 1.95702106<br>741991e-16 | VCAN/PDGFRB/TUBB/NPC2/C<br>TSK/LAMP2/OGN/LUM/PRELP                                                       | 51  | 0.289772727272727 |
| GO:0030139 CC | GO:0030139 endocytic vesicle                        | 75/1454  | 343/19869 | 4.669148437<br>10915e-18 | 2.7845103<br>40676e-16   | 1.95702106<br>741991e-16 | ITGB5/ACTG1/RIN2/LAMP2/<br>UBB/SPARC/TF/GSN/SAA1/A<br>TP6VOC/LPAR1/ATP6VOB/CT                            | 75  | 0.21865889212828  |
| GO:0101002 CC | GO:0101002 ficolin-1-rich granule                   | 50/1454  | 185/19869 | 2.255674504<br>06245e-16 | 1.2331020<br>6222081e-   | 8.66653888<br>402943e-15 | TIMP2/LAMP2/PRDX4/HSPA1<br>A/HSPA1B/HSPA8/GSN/PNP/                                                       | 50  | 0.27027027027027  |

|               |                                      |         |           |                          |                        |                          |                                                    |                      |
|---------------|--------------------------------------|---------|-----------|--------------------------|------------------------|--------------------------|----------------------------------------------------|----------------------|
| GO:0030027 CC | GO:0030027 lamellipodium             | 52/1454 | 203/19869 | 6.642485894<br>90481e-16 | 3.3519005<br>7465966e- | 2.35579661<br>697838e-14 | ANTXR1/CAPZB/ENAH/ACTB/<br>DPYSL3/FAP/PIEZ01/GSN/T | 52 0.25615763546798  |
| GO:0032432 CC | GO:0032432 actin                     | 31/1454 | 79/19869  | 1.284549840              | 6.0190335              | 4.23032203               | MARCKS/TPM4/MYL9/LIMA1/                            | 31 0.392405063291139 |
| GO:0005581 CC | GO:0005581 collagen                  | 32/1454 | 86/19869  | 2.719070882              | 1.1891403              | 8.35756523               | COL1A1/COL1A2/COL14A1/C                            | 32 0.372093023255814 |
| GO:0030667 CC | GO:0030667 secretory<br>granule      | 66/1454 | 313/19869 | 3.191189513<br>55413e-15 | 1.3083877<br>0055719e- | 9.19566451<br>932046e-14 | LAMP2/SPARC/SERPINA5/SL<br>C44A2/CPE/ATP6VOC/CD55/ | 66 0.210862619808307 |
| GO:0043202 CC | GO:0043202 lysosomal                 | 34/1454 | 98/19869  | 4.276252340              | 1.6501303              | 1.15975140               | VCAN/PDGFRB/NPC2/CTSK/L                            | 34 0.346938775510204 |
| GO:0070820 CC | GO:0070820 tertiary                  | 44/1454 | 164/19869 | 1.893395405              | 6.9003743              | 4.84974963               | TIMP2/LAMP2/QSOX1/ATP6V                            | 44 0.268292682926829 |
| GO:0005774 CC | GO:0005774 vacuolar<br>membrane      | 82/1454 | 461/19869 | 3.922814567<br>07265e-14 | 1.3544033<br>4526298e- | 9.51907357<br>550038e-13 | ABCA5/IFITM1/HSPA8/ITM2<br>C/SLC44A2/SLC39A14/CP/I | 82 0.177874186550976 |
| GO:0044391 CC | GO:0044391 ribosomal<br>subunit      | 47/1454 | 188/19869 | 4.449924716<br>93047e-14 | 1.4595753<br>0715319e- | 1.02582475<br>05345e-12  | RPS26/RPS21/RPS15A/RPL3<br>9/RPS4Y1/MRPS24/MRPS6/R | 47 0.25              |
| GO:0022627 CC | GO:0022627 cytosolic                 | 22/1454 | 45/19869  | 7.133291266              | 2.2283043              | 1.56610605               | RPS26/RPS21/RPS15A/RPS4                            | 22 0.488888888888889 |
| GO:0001726 CC | GO:0001726 ruffle                    | 45/1454 | 178/19869 | 1.000209966<br>05611e-13 | 2.9824442<br>6242187e- | 2.09613380<br>44621e-12  | LIMA1/WIPF1/TPM1/ACTN1/<br>FAP/PLCG2/S100B/TRPV4/C | 45 0.252808988764045 |
| GO:0001725 CC | GO:0001725 stress fiber              | 27/1454 | 70/19869  | 1.446585234              | 3.9539996              | 2.77896637               | TPM4/MYL9/LIMA1/SEPTIN1                            | 27 0.385714285714286 |
| GO:0097517 CC | GO:0097517 contractile               | 27/1454 | 70/19869  | 1.446585234              | 3.9539996              | 2.77896637               | TPM4/MYL9/LIMA1/SEPTIN1                            | 27 0.385714285714286 |
| GO:0098857 CC | GO:0098857 membrane<br>microdomain   | 64/1454 | 327/19869 | 3.175513167<br>52886e-13 | 8.3325465<br>5159574e- | 5.85631481<br>001113e-12 | GJA1/SERPINH1/THY1/TUBB<br>/CAVIN1/LAMP2/PDPN/FXYD | 64 0.195718654434251 |
| GO:0042611 CC | GO:0042611 MHC protein               | 16/1454 | 25/19869  | 6.782581528              | 1.7112974              | 1.20274117               | HLA-DRB1/HLA-                                      | 16 0.64              |
| GO:0005840 CC | GO:0005840 ribosome                  | 51/1454 | 232/19869 | 8.488509049<br>52456e-13 | 1.9700381<br>4708204e- | 1.38459035<br>369373e-11 | RPS26/RPL22L1/RPS21/RPS<br>15A/RPL39/APOD/RPS4Y1/M | 51 0.219827586206897 |
| GO:0045121 CC | GO:0045121 membrane raft             | 63/1454 | 326/19869 | 8.794537101<br>22359e-13 | 1.9700381<br>4708204e- | 1.38459035<br>369373e-11 | GJA1/SERPINH1/THY1/TUBB<br>/CAVIN1/PDPN/FXYD1/CFLA | 63 0.193251533742331 |
| GO:0005765 CC | GO:0005765 lysosomal<br>membrane     | 74/1454 | 418/19869 | 9.009320794<br>58252e-13 | 1.9700381<br>4708204e- | 1.38459035<br>369373e-11 | COL6A1/DAB2/LAMP2/ABCA5<br>/IFITM1/HSPA8/ITM2C/SLC | 74 0.177033492822967 |
| GO:0098852 CC | GO:0098852 lytic vacuole<br>membrane | 74/1454 | 418/19869 | 9.009320794<br>58252e-13 | 1.9700381<br>4708204e- | 1.38459035<br>369373e-11 | COL6A1/DAB2/LAMP2/ABCA5<br>/IFITM1/HSPA8/ITM2C/SLC | 74 0.177033492822967 |
| GO:0042641 CC | GO:0042641 actomyosin                | 27/1454 | 78/19869  | 3.002277528              | 6.3532066              | 4.46518695               | TPM4/MYL9/LIMA1/SEPTIN1                            | 27 0.346153846153846 |
| GO:0005938 CC | GO:0005938 cell cortex               | 60/1454 | 312/19869 | 3.823773407<br>2688e-12  | 7.8387354<br>8490104e- | 5.50925247<br>49465e-11  | CALD1/MARCKS/EPB41L2/TP<br>M4/CAPZB/MYL9/SEPTIN11/ | 60 0.192307692307692 |
| GO:0031091 CC | GO:0031091 platelet                  | 29/1454 | 91/19869  | 5.077850005              | 9.6665122              | 6.79385809               | THBS2/ACTN1/ISLR/SPARC/                            | 29 0.318681318681319 |
| GO:0005766 CC | GO:0005766 primary                   | 39/1454 | 155/19869 | 5.157437937              | 9.6665122              | 6.79385809               | TUBB/NPC2/LAMP2/TUBB4B/                            | 39 0.251612903225806 |
| GO:0042582 CC | GO:0042582 azurophil                 | 39/1454 | 155/19869 | 5.157437937              | 9.6665122              | 6.79385809               | TUBB/NPC2/LAMP2/TUBB4B/                            | 39 0.251612903225806 |
| GO:1904813 CC | GO:1904813 ficolin-1-                | 34/1454 | 124/19869 | 8.987324436              | 1.6376902              | 1.15100821               | TIMP2/PRDX4/HSPA1A/HSPA                            | 34 0.274193548387097 |

|               |                                             |         |           |                          |                          |                          |                                                                      |                      |
|---------------|---------------------------------------------|---------|-----------|--------------------------|--------------------------|--------------------------|----------------------------------------------------------------------|----------------------|
| GO:0030666 CC | GO:0030666 endocytic vesicle                | 44/1454 | 194/19869 | 1.030691776<br>76933e-11 | 1.8273886<br>6367751e-   | 1.28433285<br>412508e-10 | LAMP2/UBB/TF/ATP6VOC/ATP6VOB/CAV1/HLA-                               | 44 0.22680412371134  |
| GO:0030175 CC | GO:0030175 filopodium                       | 31/1454 | 108/19869 | 2.024012789              | 3.4940852                | 2.45572742               | ANTXR1/ENAH/FARP1/TRPV4                                              | 31 0.287037037037037 |
| GO:0030016 CC | GO:0030016 myofibril                        | 48/1454 | 233/19869 | 4.564069821<br>69664e-11 | 7.6769994<br>949564e-    | 5.39558051<br>795716e-10 | MMP2/CALD1/TPM4/CAPZB/MYL9/ACTG1/TPM1/FLNA/ACT                       | 48 0.206008583690987 |
| GO:0022625 CC | GO:0022625 cytosolic                        | 22/1454 | 59/19869  | 5.726073332              | 9.3907602                | 6.60005294               | RPL39/RPL36AL/RPL36/RPL                                              | 22 0.372881355932203 |
| GO:0042613 CC | GO:0042613 MHC class II                     | 12/1454 | 17/19869  | 9.893262473              | 1.5829219                | 1.11251578               | HLA-DRB1/HLA-                                                        | 12 0.705882352941177 |
| GO:0098858 CC | GO:0098858 actin-based cell                 | 46/1454 | 223/19869 | 1.102218854<br>70249e-10 | 1.7215608<br>7782103e-   | 1.20995453<br>22298e-09  | PDGFRA/ANTXR1/ENAH/FARP1/TRPV4/PDPN/SLC26A2/VC                       | 46 0.20627802690583  |
| GO:0009897 CC | GO:0009897 external side of plasma membrane | 74/1454 | 462/19869 | 1.246184309<br>69457e-10 | 1.9011555<br>9804566e-09 | 1.33617803<br>585366e-09 | THY1/PDGFR/ANTXR1/ITGA11/CTSK/NT5E/ITGA10/LAG3/SERPINA5/TF/SCUBE1/OS | 74 0.16017316017316  |
| GO:0005912 CC | GO:0005912 adherens                         | 40/1454 | 179/19869 | 1.441638901              | 2.1493525                | 1.51061683               | CDH11/ACTB/TRPV4/NDRG1/                                              | 40 0.223463687150838 |
| GO:0043292 CC | GO:0043292 contractile fiber                | 48/1454 | 242/19869 | 1.811571192<br>16483e-10 | 2.6408682<br>2680029e-   | 1.85606592<br>320046e-09 | MMP2/CALD1/TPM4/CAPZB/MYL9/ACTG1/TPM1/FLNA/ACT                       | 48 0.198347107438017 |
| GO:0005583 CC | GO:0005583 fibrillar                        | 10/1454 | 12/19869  | 2.463522452              | 3.4384483                | 2.41662448               | COL1A1/COL1A2/COL5A1/CO                                              | 10 0.833333333333333 |
| GO:0098643 CC | GO:0098643 banded                           | 10/1454 | 12/19869  | 2.463522452              | 3.4384483                | 2.41662448               | COL1A1/COL1A2/COL5A1/CO                                              | 10 0.833333333333333 |
| GO:0015935 CC | GO:0015935 small                            | 24/1454 | 77/19869  | 5.760103441              | 7.8721413                | 5.53273093               | RPS26/RPS21/RPS15A/RPS4                                              | 24 0.311688311688312 |
| GO:0031093 CC | GO:0031093 platelet                         | 22/1454 | 67/19869  | 9.803963718              | 1.3125306                | 9.22478218               | ACTN1/ISLR/SPARC/QSOX1/                                              | 22 0.328358208955224 |
| GO:0005604 CC | GO:0005604 basement                         | 27/1454 | 99/19869  | 1.393917984              | 1.8288203                | 1.28533910               | TNC/TGFBI/THBS2/COL5A1/                                              | 27 0.272727272727273 |
| GO:0042581 CC | GO:0042581 specific                         | 35/1454 | 160/19869 | 3.658217558              | 4.7054719                | 3.30711927               | TIMP2/CHI3L1/SLC44A2/QS                                              | 35 0.21875           |
| GO:0002102 CC | GO:0002102 podosome                         | 14/1454 | 30/19869  | 5.660445668              | 7.1408699                | 5.01877571               | TPM4/SCIN/GSN/VCAM1/PTP                                              | 14 0.466666666666667 |
| GO:0098644 CC | GO:0098644 complex of                       | 12/1454 | 22/19869  | 7.315039115              | 9.0540861                | 6.36343025               | COL1A1/COL1A2/COL5A1/CO                                              | 12 0.545454545454545 |
| GO:0030017 CC | GO:0030017 sarcomere                        | 41/1454 | 214/19869 | 1.089826783              | 1.3099149                | 9.20639807               | MMP2/TPM4/CAPZB/MYL9/TP                                              | 41 0.191588785046729 |
| GO:0030863 CC | GO:0030863 cortical                         | 27/1454 | 108/19869 | 1.098251824              | 1.3099149                | 9.20639807               | CALD1/EPB41L2/TPM4/CAPZ                                              | 27 0.25              |
| GO:0045177 CC | GO:0045177 apical part of cell              | 65/1454 | 435/19869 | 2.750960190<br>81098e-08 | 3.2225533<br>6637858e-   | 2.26488827<br>739701e-07 | GJA1/THY1/AQP1/PDGFRB/ACTG1/CTSK/FAP/TF/STK26/                       | 65 0.149425287356322 |
| GO:0030135 CC | GO:0030135 coated vesicle                   | 51/1454 | 310/19869 | 3.937499795<br>51887e-08 | 4.5315787<br>1203575e-   | 3.18490288<br>169393e-07 | DAB2/COPZ2/HSPA8/TF/STEAP2/ATP6VOC/SERPINA1/AT                       | 51 0.164516129032258 |
| GO:0072562 CC | GO:0072562 blood                            | 31/1454 | 145/19869 | 4.942200584              | 5.5897992                | 3.92864583               | C1R/ACTG1/ACTB/HSPA1A/H                                              | 31 0.213793103448276 |
| GO:0031256 CC | GO:0031256 leading edge                     | 35/1454 | 177/19869 | 5.600938078              | 6.2274836                | 4.37682583               | THY1/ANTXR1/TPM1/FAP/PI                                              | 35 0.19774011299435  |
| GO:0098576 CC | GO:0098576 lumenal side                     | 14/1454 | 35/19869  | 6.373134201              | 6.9531120                | 4.88681493               | HSPA8/HLA-DRB1/HLA-                                                  | 14 0.4               |
| GO:0045335 CC | GO:0045335 phagocytic cell                  | 30/1454 | 139/19869 | 6.465546241              | 6.9531120                | 4.88681493               | ITGB5/ACTG1/LAMP2/GSN/A                                              | 30 0.215827338129496 |
| GO:0031253 CC | GO:0031253 projection                       | 54/1454 | 344/19869 | 7.979095968<br>21805e-08 | 8.4058972<br>3753162e-   | 5.90786744<br>229597e-07 | THY1/MXRAS/AQP1/ANTXR1/LIMA1/TPM1/FAP/PIEZO1/P                       | 54 0.156976744186047 |
| GO:0098562 CC | GO:0098562 cytoplasmic                      | 38/1454 | 204/19869 | 8.072736676              | 8.4058972                | 5.90786744               | RPS26/FARP1/GEM/DNAJA1/                                              | 38 0.186274509803922 |

|               |                                   |         |           |             |           |            |                         |    |                    |
|---------------|-----------------------------------|---------|-----------|-------------|-----------|------------|-------------------------|----|--------------------|
| GO:0042788 CC | GO:0042788 polysomal              | 13/1454 | 31/19869  | 9.683681468 | 9.9257735 | 6.97607316 | RPS26/RPS21/RPL39/RPL36 | 13 | 0.419354838709677  |
| GO:0035578 CC | GO:0035578 azurophil              | 23/1454 | 91/19869  | 1.064639804 | 1.0744672 | 7.55161513 | TUBB/NPC2/TUBB4B/SDCBP/ | 23 | 0.252747252747253  |
| GO:0005884 CC | GO:0005884 actin                  | 26/1454 | 114/19869 | 1.510830535 | 1.5016739 | 1.05541271 | TPM4/WIPF1/ACTG1/ACTB/T | 26 | 0.228070175438596  |
| GO:0005770 CC | GO:0005770 late endosome          | 47/1454 | 288/19869 | 1.703143163 | 1.6516904 | 1.16084790 | LAMP2/ABCA5/HSPA8/DDIT3 | 47 | 0.1631944444444444 |
| GO:0070821 CC | GO:0070821 tertiary               | 20/1454 | 73/19869  | 1.712118138 | 1.6516904 | 1.16084790 | ATP6VOC/CD59/CYSTM1/FCE | 20 | 0.273972602739726  |
| GO:0030136 CC | GO:0030136 clathrin-              | 38/1454 | 211/19869 | 2.004516291 | 1.9057430 | 1.33940219 | DAB2/HSPA8/TF/STEAP2/AT | 38 | 0.180094786729858  |
| GO:0042470 CC | GO:0042470 melanosome             | 25/1454 | 110/19869 | 2.799496756 | 2.5865772 | 1.81790893 | GNPMB/HSPA8/RAN/SDCBP/S | 25 | 0.227272727272727  |
| GO:0048770 CC | GO:0048770 pigment                | 25/1454 | 110/19869 | 2.799496756 | 2.5865772 | 1.81790893 | GNPMB/HSPA8/RAN/SDCBP/S | 25 | 0.227272727272727  |
| GO:0071556 CC | GO:0071556 integral               | 12/1454 | 29/19869  | 3.621589464 | 3.2544694 | 2.28731966 | HLA-DRB1/HLA-           | 12 | 0.413793103448276  |
| GO:0098553 CC | GO:0098553 luminal side           | 12/1454 | 29/19869  | 3.621589464 | 3.2544694 | 2.28731966 | HLA-DRB1/HLA-           | 12 | 0.413793103448276  |
| GO:0005844 CC | GO:0005844 polysome               | 18/1454 | 66/19869  | 7.562281963 | 6.7038607 | 4.71163513 | RPS26/RPS21/RPL39/RPS4Y | 18 | 0.272727272727273  |
| GO:0030665 CC | GO:0030665 clathrin-              | 27/1454 | 132/19869 | 8.965583044 | 7.8418966 | 5.51147420 | DAB2/HSPA8/TF/ATP6VOC/A | 27 | 0.204545454545455  |
| GO:0009898 CC | GO:0009898 cytoplasmic            | 32/1454 | 173/19869 | 9.796401713 | 8.4558414 | 5.94296946 | FARP1/GEM/GNG5/CHMP4B/S | 32 | 0.184971098265896  |
| GO:0031258 CC | GO:0031258 lamellipodium          | 10/1454 | 22/19869  | 1.221235760 | 1.0404294 | 7.31238910 | ANTXR1/FAP/PIEZO1/CSPG4 | 10 | 0.454545454545455  |
| GO:0005769 CC | GO:0005769 early endosome         | 58/1454 | 414/19869 | 1.341422454 | 1.1281706 | 7.92905580 | GNPMB/EEA1/MELTF/TF/SLC | 58 | 0.140096618357488  |
| GO:0044309 CC | GO:0044309 neuron spine           | 32/1454 | 176/19869 | 1.448729766 | 1.2029958 | 8.45494520 | SEPTIN11/ACTN1/EEA1/PAL | 32 | 0.181818181818182  |
| GO:0005767 CC | GO:0005767 secondary              | 9/1454  | 18/19869  | 1.557226958 | 1.2769261 | 8.97454484 | LAMP2/SQSTM1/FTL/MAP1LC | 9  | 0.5                |
| GO:0015934 CC | GO:0015934 large                  | 24/1454 | 115/19869 | 2.456386324 | 1.9893696 | 1.39817701 | RPL39/RPL36AL/MRPL44/RP | 24 | 0.208695652173913  |
| GO:0019897 CC | GO:0019897 extrinsic              | 31/1454 | 172/19869 | 2.546241027 | 2.0369928 | 1.43164771 | CDH11/EEA1/FARP1/TF/SCU | 31 | 0.180232558139535  |
| GO:0030662 CC | GO:0030662 coated                 | 34/1454 | 198/19869 | 2.640047744 | 2.0865919 | 1.46650718 | DAB2/COPZ2/HSPA8/TF/ATP | 34 | 0.171717171717172  |
| GO:0030669 CC | GO:0030669 clathrin-              | 18/1454 | 72/19869  | 3.001109750 | 2.3437238 | 1.64722565 | TF/HLA-DRB1/HLA-        | 18 | 0.25               |
| GO:0016324 CC | GO:0016324 apical plasma membrane | 52/1454 | 368/19869 | 3.624672902 | 2.7917135 | 1.96208367 | GJA1/THY1/AQP1/PDGFRB/C | 52 | 0.141304347826087  |
| GO:0030864 CC | GO:0030864 cortical               | 19/1454 | 80/19869  | 3.670170829 | 2.7917135 | 1.96208367 | CALD1/EPB41L2/ACTN1/GSN | 19 | 0.2375             |
| GO:0043197 CC | GO:0043197 dendritic              | 31/1454 | 175/19869 | 3.702425018 | 2.7917135 | 1.96208367 | SEPTIN11/ACTN1/PALMD/FA | 31 | 0.177142857142857  |
| GO:0101003 CC | GO:0101003 ficolin-1-             | 16/1454 | 61/19869  | 5.388929688 | 4.0172021 | 2.82338660 | LAMP2/ATP6VOC/CD55/FCER | 16 | 0.262295081967213  |
| GO:0032587 CC | GO:0032587 ruffle                 | 21/1454 | 97/19869  | 5.601912912 | 4.1290504 | 2.90199628 | TPM1/FAP/PLCG2/TRPV4/PD | 21 | 0.216494845360825  |
| GO:1904724 CC | GO:1904724 tertiary               | 15/1454 | 55/19869  | 6.257972026 | 4.5578711 | 3.20338183 | TIMP2/QSOX1/ILF2/FTH1/T | 15 | 0.272727272727273  |
| GO:0044754 CC | GO:0044754 autolysosome           | 7/1454  | 12/19869  | 6.322656618 | 4.5578711 | 3.20338183 | LAMP2/SQSTM1/FTL/MAP1LC | 7  | 0.583333333333333  |
| GO:0035579 CC | GO:0035579 specific               | 20/1454 | 91/19869  | 7.308425519 | 5.2112251 | 3.66257480 | SLC44A2/CD59/PLAUR/ORMD | 20 | 0.21978021978022   |
| GO:0005902 CC | GO:0005902 microvillus            | 20/1454 | 93/19869  | 1.033434596 | 7.2896031 | 5.12330903 | PDGFRA/PDPN/SLC26A2/VCA | 20 | 0.21505376344086   |
| GO:0035577 CC | GO:0035577 azurophil              | 15/1454 | 58/19869  | 1.270191454 | 8.8376658 | 6.21132481 | LAMP2/ATP6VOC/VAMP8/CD6 | 15 | 0.258620689655172  |
| GO:0005903 CC | GO:0005903 brush border           | 21/1454 | 102/19869 | 1.279844896 | 8.8376658 | 6.21132481 | AQP1/CAPZB/LIMA1/FLNA/A | 21 | 0.205882352941176  |
| GO:0098636 CC | GO:0098636 protein                | 14/1454 | 52/19869  | 1.493047760 | 0.0001020 | 7.17055832 | TNC/ITGA11/ITGB5/LGALS1 | 14 | 0.269230769230769  |

|               |                                      |         |           |             |           |            |                         |    |                   |
|---------------|--------------------------------------|---------|-----------|-------------|-----------|------------|-------------------------|----|-------------------|
| GO:0030018 CC | GO:0030018 Z disc                    | 24/1454 | 130/19869 | 2.212457305 | 0.0001496 | 0.00010516 | MYL9/FLNA/ACTN1/ANK3/CR | 24 | 0.184615384615385 |
| GO:0045334 CC | GO:0045334 clathrin-                 | 19/1454 | 90/19869  | 2.252233639 | 0.0001507 | 0.00010595 | TF/HLA-DRB1/HLA-        | 19 | 0.211111111111111 |
| GO:0019898 CC | GO:0019898 extrinsic<br>component of | 44/1454 | 316/19869 | 2.855030631 | 0.0001891 | 0.00013296 | CDH11/SOCS3/PIK3R3/EEA1 | 44 | 0.139240506329114 |
| GO:0035580 CC | GO:0035580 specific                  | 15/1454 | 62/19869  | 3.009485315 | 0.0001974 | 0.00013875 | TIMP2/CHI3L1/QSOX1/SLPI | 15 | 0.241935483870968 |
| GO:0098862 CC | GO:0098862 cluster of                | 27/1454 | 159/19869 | 3.347855037 | 0.0002174 | 0.00015282 | AQP1/CAPZB/LIMA1/FLNA/A | 27 | 0.169811320754717 |
| GO:0030134 CC | GO:0030134 COPII-coated              | 19/1454 | 95/19869  | 4.974566231 | 0.0003199 | 0.00022485 | SERPINA1/CD59/TMED5/HLA | 19 | 0.2               |
| GO:0030427 CC | GO:0030427 site of                   | 28/1454 | 173/19869 | 5.872569206 | 0.0003740 | 0.00026287 | THY1/FLNA/DPYSL3/PCDH9/ | 28 | 0.161849710982659 |
| GO:0030133 CC | GO:0030133 transport<br>vesicle      | 53/1454 | 423/19869 | 8.617251678 | 0.0005435 | 0.00038201 | SSPN/SLC40A1/DPYSL3/GAL | 53 | 0.125295508274232 |
| GO:0031234 CC | GO:0031234 extrinsic                 | 19/1454 | 99/19869  | 8.947506699 | 0.0005590 | 0.00039288 | FARP1/GNG5/S100A6/PLEKH | 19 | 0.191919191919192 |
| GO:0031674 CC | GO:0031674 I band                    | 24/1454 | 143/19869 | 0.000108178 | 0.0006694 | 0.00047052 | MYL9/FLNA/ACTN1/ANK3/CR | 24 | 0.167832167832168 |
| GO:0055037 CC | GO:0055037 recycling                 | 30/1454 | 198/19869 | 0.000113209 | 0.0006940 | 0.00048781 | TUBA1A/MELTF/TF/NDRG1/R | 30 | 0.151515151515152 |
| GO:0030670 CC | GO:0030670 phagocytic                | 16/1454 | 77/19869  | 0.000119306 | 0.0007246 | 0.00050932 | LAMP2/ATP6VOC/ATP6VOB/C | 16 | 0.207792207792208 |
| GO:0016323 CC | GO:0016323 basolateral               | 33/1454 | 229/19869 | 0.000141819 | 0.0008535 | 0.00059987 | CADM1/AQP1/SLC40A1/ANK3 | 33 | 0.14410480349345  |
| GO:0012507 CC | GO:0012507 ER to Golgi               | 14/1454 | 63/19869  | 0.000147683 | 0.0008807 | 0.00061900 | CD59/HLA-DRB1/HLA-      | 14 | 0.222222222222222 |
| GO:0005905 CC | GO:0005905 clathrin-                 | 15/1454 | 71/19869  | 0.000158651 | 0.0009376 | 0.00065897 | DAB2/TF/HSPD1/LRP10/AP1 | 15 | 0.211267605633803 |
| GO:0031527 CC | GO:0031527 filopodium                | 7/1454  | 18/19869  | 0.000171683 | 0.0010055 | 0.00070674 | ANTXR1/PDPN/VASP/ARF6/U | 7  | 0.388888888888889 |
| GO:0044291 CC | GO:0044291 cell-cell                 | 15/1454 | 72/19869  | 0.000187022 | 0.0010857 | 0.00076307 | GJA1/ACTN1/PCDH9/ANK3/F | 15 | 0.208333333333333 |
| GO:0044853 CC | GO:0044853 plasma                    | 20/1454 | 113/19869 | 0.000189130 | 0.0010883 | 0.00076490 | CAVIN1/FXYD1/KCNMA1/PTG | 20 | 0.176991150442478 |
| GO:0045178 CC | GO:0045178 basal part of             | 37/1454 | 272/19869 | 0.000192936 | 0.0011005 | 0.00077351 | CADM1/AQP1/SLC40A1/FAP/ | 37 | 0.136029411764706 |
| GO:0055038 CC | GO:0055038 recycling                 | 18/1454 | 97/19869  | 0.000211623 | 0.0011967 | 0.00084111 | NDRG1/PDLIM4/RAB13/VAMP | 18 | 0.185567010309278 |
| GO:0009925 CC | GO:0009925 basal plasma              | 35/1454 | 254/19869 | 0.000220904 | 0.0012385 | 0.00087049 | CADM1/AQP1/SLC40A1/ANK3 | 35 | 0.137795275590551 |
| GO:0005901 CC | GO:0005901 caveola                   | 16/1454 | 82/19869  | 0.000257558 | 0.0014318 | 0.00100633 | CAVIN1/FXYD1/KCNMA1/PTG | 16 | 0.195121951219512 |
| GO:0008305 CC | GO:0008305 integrin                  | 9/1454  | 31/19869  | 0.000270358 | 0.0014903 | 0.00104747 | ITGA11/ITGB5/ITGA10/ITG | 9  | 0.290322580645161 |
| GO:0042383 CC | GO:0042383 sarcolemma                | 22/1454 | 136/19869 | 0.000351701 | 0.0019226 | 0.00135127 | COL6A3/COL6A1/AQP1/COL6 | 22 | 0.161764705882353 |
| GO:0031901 CC | GO:0031901 early                     | 27/1454 | 183/19869 | 0.000376136 | 0.0020392 | 0.00143321 | GPNMB/EEA1/SLC39A14/STE | 27 | 0.147540983606557 |
| GO:0032154 CC | GO:0032154 cleavage                  | 12/1454 | 54/19869  | 0.000432310 | 0.0023245 | 0.00163375 | LIMA1/RHOC/RHOA/ARF6/MY | 12 | 0.222222222222222 |
| GO:0043209 CC | GO:0043209 myelin sheath             | 11/1454 | 47/19869  | 0.000463700 | 0.0024730 | 0.00173813 | TSPAN2/ANXA2/PMP22/CALM | 11 | 0.234042553191489 |
| GO:0030426 CC | GO:0030426 growth cone               | 25/1454 | 167/19869 | 0.000488230 | 0.0025828 | 0.00181532 | THY1/FLNA/DPYSL3/PCDH9/ | 25 | 0.149700598802395 |
| GO:0043034 CC | GO:0043034 costamere                 | 6/1454  | 16/19869  | 0.000641638 | 0.0033673 | 0.00236663 | ANK3/SDC4/AHNAK/PLEC/VC | 6  | 0.375             |
| GO:0031904 CC | GO:0031904 endosome                  | 9/1454  | 35/19869  | 0.000725776 | 0.0037786 | 0.00265572 | CTSK/CTSL/PDLIM4/CTSS/C | 9  | 0.257142857142857 |
| GO:0098978 CC | GO:0098978 glutamatergic             | 40/1454 | 324/19869 | 0.000807631 | 0.0041717 | 0.00293197 | CDH11/PTPRD/ACTB/ACTN1/ | 40 | 0.123456790123457 |
| GO:0030904 CC | GO:0030904 retromer                  | 5/1454  | 12/19869  | 0.001067406 | 0.0054704 | 0.00384477 | SNX2/SNX6/VPS29/VPS35/S | 5  | 0.416666666666667 |
| GO:0046658 CC | GO:0046658 anchored                  | 12/1454 | 62/19869  | 0.001582639 | 0.0080481 | 0.00565643 | THY1/GAS1/MELTF/GPC6/UL | 12 | 0.193548387096774 |
| GO:0044194 CC | GO:0044194 cytolytic                 | 5/1454  | 13/19869  | 0.001630483 | 0.0082276 | 0.00578260 | RNF19B/SERPINB1/SRGN/AR | 5  | 0.384615384615385 |

|               |                            |         |           |             |           |            |                         |    |                   |
|---------------|----------------------------|---------|-----------|-------------|-----------|------------|-------------------------|----|-------------------|
| GO:0030658 CC | GO:0030658 transport       | 29/1454 | 222/19869 | 0.001705463 | 0.0085403 | 0.00600235 | CPE/ATP6VOC/RAB1A/CD59/ | 29 | 0.130630630630631 |
| GO:0032153 CC | GO:0032153 cell division   | 13/1454 | 72/19869  | 0.001993292 | 0.0099060 | 0.00696221 | LIMA1/SEPTIN11/RHOC/RHO | 13 | 0.180555555555555 |
| GO:0098984 CC | GO:0098984 neuron to       | 41/1454 | 351/19869 | 0.002032401 | 0.0100244 | 0.00704544 | CADM1/CAPZB/PTPRD/DNAJB | 41 | 0.116809116809117 |
| GO:0014069 CC | GO:0014069 postsynaptic    | 38/1454 | 321/19869 | 0.002297253 | 0.0112462 | 0.00790413 | CADM1/CAPZB/DNAJB1/CRYA | 38 | 0.118380062305296 |
| GO:0005834 CC | GO:0005834 heterotrimeric  | 8/1454  | 34/19869  | 0.002628474 | 0.0127724 | 0.00897677 | GNG5/GNAQ/GNA13/GNAI2/G | 8  | 0.235294117647059 |
| GO:0005811 CC | GO:0005811 lipid droplet   | 16/1454 | 102/19869 | 0.002946900 | 0.0142144 | 0.00999026 | HILPDA/DHRS3/ANXA2/GOS2 | 16 | 0.156862745098039 |
| GO:0005802 CC | GO:0005802 trans-Golgi     | 32/1454 | 262/19869 | 0.003019882 | 0.0144601 | 0.01016295 | TGFBI/POSTN/FLNA/PCSK1N | 32 | 0.122137404580153 |
| GO:0032279 CC | GO:0032279 asymmetric      | 38/1454 | 327/19869 | 0.003166855 | 0.0149474 | 0.01050539 | CADM1/CAPZB/DNAJB1/CRYA | 38 | 0.116207951070336 |
| GO:0005865 CC | GO:0005865 striated        | 6/1454  | 21/19869  | 0.003167209 | 0.0149474 | 0.01050539 | TPM4/TPM1/TNNT3/TPM3/TP | 6  | 0.285714285714286 |
| GO:0043296 CC | GO:0043296 apical          | 21/1454 | 151/19869 | 0.003324970 | 0.0155658 | 0.01094007 | MXRA8/FRMD6/ACTG1/ACTB/ | 21 | 0.139072847682119 |
| GO:0031528 CC | GO:0031528 microvillus     | 7/1454  | 28/19869  | 0.003345715 | 0.0155658 | 0.01094007 | PDPN/SLC26A2/CA9/EZR/MS | 7  | 0.25              |
| GO:0070160 CC | GO:0070160 tight           | 19/1454 | 132/19869 | 0.003456741 | 0.0159691 | 0.01122351 | GJA1/MXRA8/ACTB/ANK3/US | 19 | 0.143939393939394 |
| GO:0099572 CC | GO:0099572 postsynaptic    | 39/1454 | 342/19869 | 0.003907799 | 0.0179266 | 0.01259930 | CADM1/CAPZB/DNAJB1/HSPA | 39 | 0.114035087719298 |
| GO:0000421 CC | GO:0000421 autophagosome   | 10/1454 | 52/19869  | 0.003980109 | 0.0181316 | 0.01274333 | LAMP2/VMP1/MAP1LC3B/CHM | 10 | 0.192307692307692 |
| GO:0098791 CC | GO:0098791 Golgi apparatus | 43/1454 | 387/19869 | 0.004086607 | 0.0184883 | 0.01299407 | TGFBI/POSTN/GALNT1/FLNA | 43 | 0.111111111111111 |
|               |                            |         |           | 42401619    | 756562388 | 66005016   | /ASAP2/PCSK1N/SULF2/XYL |    |                   |
| GO:0036019 CC | GO:0036019 endolysosome    | 7/1454  | 29/19869  | 0.004136054 | 0.0185839 | 0.01306122 | CTSK/CTSL/CTSS/CTSB/LGM | 7  | 0.241379310344828 |
| GO:0005641 CC | GO:0005641 nuclear         | 4/1454  | 10/19869  | 0.004191511 | 0.0186604 | 0.01311499 | TUBB/PTGES/APP/CACYBP   | 4  | 0.4               |
| GO:0030176 CC | GO:0030176 integral        | 22/1454 | 164/19869 | 0.004209972 | 0.0186604 | 0.01311499 | RETREG1/DPM3/INSIG1/HSP | 22 | 0.134146341463415 |
| GO:0005796 CC | GO:0005796 Golgi lumen     | 16/1454 | 106/19869 | 0.004354727 | 0.0191724 | 0.01347488 | VCAN/OGN/LUM/PRELP/GPC6 | 16 | 0.150943396226415 |
| GO:0036464 CC | GO:0036464 cytoplasmic     | 30/1454 | 248/19869 | 0.004594602 | 0.0200937 | 0.01412235 | ZFP36L1/TUBB/TUBA1A/ACT | 30 | 0.120967741935484 |
| GO:0001772 CC | GO:0001772 immunological   | 9/1454  | 45/19869  | 0.004705834 | 0.0204438 | 0.01436846 | ICAM1/HLA-DRB1/HLA-     | 9  | 0.2               |
| GO:0016528 CC | GO:0016528 sarcoplasm      | 14/1454 | 89/19869  | 0.005092295 | 0.0219772 | 0.01544615 | ANK3/S100A1/SERTAD1/CTH | 14 | 0.157303370786517 |
| GO:0033116 CC | GO:0033116 endoplasmic     | 13/1454 | 80/19869  | 0.005152017 | 0.0220896 | 0.01552517 | GALNT1/VMP1/PIEZ01/COPZ | 13 | 0.1625            |
| GO:0071682 CC | GO:0071682 endocytic       | 6/1454  | 23/19869  | 0.005194437 | 0.0221269 | 0.01555135 | SPARC/SAA1/CTSL/HSP90AA | 6  | 0.260869565217391 |
| GO:0031092 CC | GO:0031092 platelet        | 5/1454  | 17/19869  | 0.006128917 | 0.0257728 | 0.01811380 | SPARC/LHFPL2/APLP2/PECA | 5  | 0.294117647058824 |
| GO:0043020 CC | GO:0043020 NADPH oxidase   | 5/1454  | 17/19869  | 0.006128917 | 0.0257728 | 0.01811380 | CYBB/NCF1/NCF2/CYBA/RAC | 5  | 0.294117647058824 |
| GO:0002116 CC | GO:0002116 semaphorin      | 4/1454  | 11/19869  | 0.006208105 | 0.0257754 | 0.01811559 | NRP2/NRP1/PLXND1/PLXNB2 | 4  | 0.363636363636364 |
| GO:0005614 CC | GO:0005614 interstitial    | 4/1454  | 11/19869  | 0.006208105 | 0.0257754 | 0.01811559 | TNC/COL14A1/VIT/VWA1    | 4  | 0.363636363636364 |
| GO:0031233 CC | GO:0031233 intrinsic       | 6/1454  | 24/19869  | 0.006504117 | 0.0268345 | 0.01886000 | THY1/CD59/CD14/FOLR2/AD | 6  | 0.25              |
| GO:0032588 CC | GO:0032588 trans-Golgi     | 15/1454 | 101/19869 | 0.006585438 | 0.0270002 | 0.01897646 | HLA-DRB1/HLA-           | 15 | 0.148514851485149 |
| GO:0008287 CC | GO:0008287 protein         | 10/1454 | 56/19869  | 0.006872532 | 0.0280023 | 0.01968074 | PPP1R15A/PPP1R3C/PPP1R1 | 10 | 0.178571428571429 |
| GO:0030496 CC | GO:0030496 midbody         | 25/1454 | 203/19869 | 0.007300934 | 0.0295642 | 0.02077848 | GEM/RAN/ANXA2/CHMP4B/HS | 25 | 0.123152709359606 |
| GO:0031227 CC | GO:0031227 intrinsic       | 22/1454 | 172/19869 | 0.007395153 | 0.0297620 | 0.02091751 | RETREG1/DPM3/INSIG1/HSP | 22 | 0.127906976744186 |
| GO:1905360 CC | GO:1905360 GTPase          | 8/1454  | 40/19869  | 0.007538096 | 0.0301523 | 0.02119182 | GNG5/GNAQ/GNA13/GNAI2/G | 8  | 0.2               |
| GO:0036379 CC | GO:0036379 myofilament     | 6/1454  | 25/19869  | 0.008037740 | 0.0319561 | 0.02245952 | TPM4/TPM1/TNNT3/TPM3/TP | 6  | 0.24              |

|               |                          |         |           |             |           |            |                         |                       |
|---------------|--------------------------|---------|-----------|-------------|-----------|------------|-------------------------|-----------------------|
| GO:0005793 CC | GO:0005793 endoplasmic   | 18/1454 | 133/19869 | 0.008280837 | 0.0327242 | 0.02299940 | SERPINH1/GALNT1/VMP1/PI | 18 0.135338345864662  |
| GO:1903293 CC | GO:1903293 phosphatase   | 10/1454 | 58/19869  | 0.008824482 | 0.0346638 | 0.02436257 | PPP1R15A/PPP1R3C/PPP1R1 | 10 0.172413793103448  |
| GO:0031902 CC | GO:0031902 late endosome | 20/1454 | 155/19869 | 0.009402085 | 0.0367129 | 0.02580271 | LAMP2/ABCA5/SLC39A14/IF | 20 0.129032258064516  |
| GO:0005776 CC | GO:0005776 autophagosome | 16/1454 | 115/19869 | 0.009562664 | 0.0369951 | 0.02600110 | LAMP2/VMP1/HSPA8/MAP1LC | 16 0.139130434782609  |
| GO:0014704 CC | GO:0014704 intercalated  | 9/1454  | 50/19869  | 0.009587164 | 0.0369951 | 0.02600110 | GJA1/ACTN1/ANK3/FXYD1/A | 9 0.18                |
| GO:0035770 CC | GO:0035770 ribonucleopro | 30/1454 | 265/19869 | 0.011485382 | 0.0440608 | 0.03096705 | ZFP36L1/TUBB/TUBA1A/ACT | 30 0.113207547169811  |
| GO:0001931 CC | GO:0001931 uropod        | 4/1454  | 13/19869  | 0.011955330 | 0.0450729 | 0.03167837 | EZR/MSN/MYH9/ICAM2      | 4 0.307692307692308   |
| GO:0031254 CC | GO:0031254 cell trailing | 4/1454  | 13/19869  | 0.011955330 | 0.0450729 | 0.03167837 | EZR/MSN/MYH9/ICAM2      | 4 0.307692307692308   |
| GO:0043218 CC | GO:0043218 compact       | 4/1454  | 13/19869  | 0.011955330 | 0.0450729 | 0.03167837 | ANXA2/PMP22/MBP/CLDN5   | 4 0.307692307692308   |
| GO:0005798 CC | GO:0005798 Golgi-        | 13/1454 | 89/19869  | 0.012535558 | 0.0469904 | 0.03302601 | GJA1/ITM2B/COP2/STK26/  | 13 0.146067415730337  |
| GO:0150034 CC | GO:0150034 distal axon   | 31/1454 | 278/19869 | 0.012643306 | 0.0471250 | 0.03312062 | THY1/ACTG1/ACTB/FLNA/DP | 31 0.111510791366906  |
| GO:0031362 CC | GO:0031362 anchored      | 5/1454  | 20/19869  | 0.012785282 | 0.0473850 | 0.03330332 | THY1/CD59/CD14/FOLR2/HY | 5 0.25                |
| GO:0001891 CC | GO:0001891 phagocytic    | 6/1454  | 28/19869  | 0.014175204 | 0.0522412 | 0.03671637 | ANXA1/AIF1/LCP1/TLR4/RA | 6 0.214285714285714   |
| GO:0098685 CC | GO:0098685 Schaffer      | 11/1454 | 72/19869  | 0.015103906 | 0.0553528 | 0.03890332 | CDH11/CAPZB/PTPRD/ACTG1 | 11 0.152777777777778  |
| GO:0070469 CC | GO:0070469 respirasome   | 14/1454 | 101/19869 | 0.015197342 | 0.0553858 | 0.03892652 | NDUFA4/NDUFB1/UQCR11/CO | 14 0.138613861386139  |
| GO:0090575 CC | GO:0090575 RNA           | 28/1454 | 249/19869 | 0.015466613 | 0.0556927 | 0.03914220 | MAFB/JUN/TCF4/FOS/RUNX1 | 28 0.112449799196787  |
| GO:0030132 CC | GO:0030132 clathrin coat | 4/1454  | 14/19869  | 0.015783676 | 0.0556927 | 0.03914220 | AP2A2/PICALM/EPS15/AP2S | 4 0.285714285714286   |
| GO:0031089 CC | GO:0031089 platelet      | 4/1454  | 14/19869  | 0.015783676 | 0.0556927 | 0.03914220 | ECM1/CDC37L1/SELENOP/TI | 4 0.285714285714286   |
| GO:0098554 CC | GO:0098554 cytoplasmic   | 4/1454  | 14/19869  | 0.015783676 | 0.0556927 | 0.03914220 | RPS26/DNAJA1/RPS29/RPS2 | 4 0.285714285714286   |
| GO:0042827 CC | GO:0042827 platelet      | 5/1454  | 21/19869  | 0.015790930 | 0.0556927 | 0.03914220 | ECM1/LAMP2/CDC37L1/SELE | 5 0.238095238095238   |
| GO:0097038 CC | GO:0097038 perinuclear   | 5/1454  | 21/19869  | 0.015790930 | 0.0556927 | 0.03914220 | PIK3R1/CYBB/CYBA/ADAM10 | 5 0.238095238095238   |
| GO:0016328 CC | GO:0016328 lateral       | 10/1454 | 64/19869  | 0.017259521 | 0.0605467 | 0.04255373 | ANK3/ANXA1/RAB13/ATP1B1 | 10 0.15625            |
| GO:0031970 CC | GO:0031970 organelle     | 13/1454 | 94/19869  | 0.019208258 | 0.0667548 | 0.04691694 | TUBB/CYCS/TXNIP/PRELID1 | 13 0.138297872340426  |
| GO:0090665 CC | GO:0090665 glycoprotein  | 5/1454  | 22/19869  | 0.019232732 | 0.0667548 | 0.04691694 | SSPN/FLNA/SGCB/UTRN/SNT | 5 0.227272727272727   |
| GO:0005923 CC | GO:0005923 bicellular    | 16/1454 | 127/19869 | 0.023068279 | 0.0794490 | 0.05583868 | MXRA8/ANK3/USP53/MAGI2/ | 16 0.125984251968504  |
| GO:0044295 CC | GO:0044295 axonal growth | 5/1454  | 23/19869  | 0.023132258 | 0.0794490 | 0.05583868 | FLNA/HSP90AA1/BOC/SHTN1 | 5 0.217391304347826   |
| GO:0005874 CC | GO:0005874 microtubule   | 46/1454 | 466/19869 | 0.023604069 | 0.0806472 | 0.05668082 | TUBB/TUBA1A/TUBB4B/TUBB | 46 0.0987124463519313 |
|               |                          |         |           | 020227      | 358191091 | 36340978   | 2A/TRPV4/TUBB2B/NDRG1/S |                       |
| GO:0017053 CC | GO:0017053 transcription | 11/1454 | 77/19869  | 0.023998560 | 0.0811497 | 0.05703401 | JUN/RBPJ/TBL1XR1/GLI3/Z | 11 0.142857142857143  |
| GO:0035861 CC | GO:0035861 site of       | 11/1454 | 77/19869  | 0.023998560 | 0.0811497 | 0.05703401 | LMNA/SAMHD1/ARPC5/ARPC3 | 11 0.142857142857143  |
| GO:0016469 CC | GO:0016469 proton-       | 8/1454  | 50/19869  | 0.027654864 | 0.0930338 | 0.06538640 | ATP5ME/ATP6VOC/ATP6VOB/ | 8 0.16                |
| GO:0016010 CC | GO:0016010 dystrophin-   | 4/1454  | 17/19869  | 0.031504428 | 0.1047999 | 0.07365596 | SSPN/SGCB/UTRN/SNTB2    | 4 0.235294117647059   |
| GO:0000220 CC | GO:0000220 vacuolar      | 3/1454  | 10/19869  | 0.031791461 | 0.1047999 | 0.07365596 | ATP6VOC/ATP6VOB/ATP6AP2 | 3 0.3                 |
| GO:0071203 CC | GO:0071203 WASH complex  | 3/1454  | 10/19869  | 0.031791461 | 0.1047999 | 0.07365596 | CAPZB/CAPZA1/WASHC4     | 3 0.3                 |
| GO:0097197 CC | GO:0097197 tetraspanin-  | 3/1454  | 10/19869  | 0.031791461 | 0.1047999 | 0.07365596 | PDPN/SAMHD1/ADAM10      | 3 0.3                 |
| GO:0016460 CC | GO:0016460 myosin II     | 5/1454  | 26/19869  | 0.037747287 | 0.1225852 | 0.08615587 | MYL9/MYL12A/MYH9/MYL6/M | 5 0.192307692307692   |

|               |                                          |         |           |             |           |            |                         |                      |
|---------------|------------------------------------------|---------|-----------|-------------|-----------|------------|-------------------------|----------------------|
| GO:0033177 CC | GO:0033177 proton-                       | 5/1454  | 26/19869  | 0.037747287 | 0.1225852 | 0.08615587 | ATP5ME/ATP6VOC/ATP6VOB/ | 5 0.192307692307692  |
| GO:0046930 CC | GO:0046930 pore complex                  | 5/1454  | 26/19869  | 0.037747287 | 0.1225852 | 0.08615587 | SLC25A5/AFDN/BAX/ADAM10 | 5 0.192307692307692  |
| GO:0031968 CC | GO:0031968 organelle                     | 25/1454 | 235/19869 | 0.038217380 | 0.1229196 | 0.08639091 | UBB/PLA2G2A/PTGS2/PPP1R | 25 0.106382978723404 |
| GO:0000164 CC | GO:0000164 protein                       | 4/1454  | 18/19869  | 0.038225020 | 0.1229196 | 0.08639091 | PPP1R15A/PPP1R3C/PPP1CA | 4 0.222222222222222  |
| GO:0005771 CC | GO:0005771 multivesicula                 | 9/1454  | 63/19869  | 0.038971425 | 0.1241031 | 0.08722271 | STEAP3/CHMP4B/CTSL/CD74 | 9 0.142857142857143  |
| GO:0044304 CC | GO:0044304 main axon                     | 9/1454  | 63/19869  | 0.038971425 | 0.1241031 | 0.08722271 | THY1/ANK3/SPOCK1/EPB41L | 9 0.142857142857143  |
| GO:1990204 CC | GO:1990204 oxidoreductas                 | 15/1454 | 125/19869 | 0.039624560 | 0.1255734 | 0.08825607 | NDUFA4/NDUFB1/UQCR11/ND | 15 0.12              |
| GO:0034992 CC | GO:0034992 microtubule                   | 3/1454  | 11/19869  | 0.041385220 | 0.1274587 | 0.08958105 | SUN2/SYNE1/SYNE2        | 3 0.272727272727273  |
| GO:0034993 CC | GO:0034993 meiotic                       | 3/1454  | 11/19869  | 0.041385220 | 0.1274587 | 0.08958105 | SUN2/SYNE1/SYNE2        | 3 0.272727272727273  |
| GO:0106083 CC | GO:0106083 nuclear                       | 3/1454  | 11/19869  | 0.041385220 | 0.1274587 | 0.08958105 | SUN2/SYNE1/SYNE2        | 3 0.272727272727273  |
| GO:0106094 CC | GO:0106094 nuclear                       | 3/1454  | 11/19869  | 0.041385220 | 0.1274587 | 0.08958105 | SUN2/SYNE1/SYNE2        | 3 0.272727272727273  |
| GO:1904090 CC | GO:1904090 peptidase                     | 3/1454  | 11/19869  | 0.041385220 | 0.1274587 | 0.08958105 | SERPINA5/CTSB/PLAT      | 3 0.272727272727273  |
| GO:1905370 CC | GO:1905370 serine-type                   | 3/1454  | 11/19869  | 0.041385220 | 0.1274587 | 0.08958105 | CFH/PLAUR/THBD          | 3 0.272727272727273  |
| GO:0019867 CC | GO:0019867 outer                         | 25/1454 | 237/19869 | 0.041626432 | 0.1276025 | 0.08968213 | UBB/PLA2G2A/PTGS2/PPP1R | 25 0.105485232067511 |
| GO:0033176 CC | GO:0033176 proton-                       | 5/1454  | 27/19869  | 0.043631989 | 0.1331283 | 0.09356578 | ATP6VOC/ATP6VOB/ATP6V1F | 5 0.185185185185185  |
| GO:0051233 CC | GO:0051233 spindle                       | 6/1454  | 36/19869  | 0.044684477 | 0.1357084 | 0.09537914 | GEM/CDC42/ARL8B/NUMA1/A | 6 0.166666666666667  |
| GO:0032433 CC | GO:0032433 filopodium                    | 4/1454  | 19/19869  | 0.045700649 | 0.1381549 | 0.09709864 | MYO5A/CYFIP1/ABI1/MYO10 | 4 0.210526315789474  |
| GO:0016459 CC | GO:0016459 myosin                        | 8/1454  | 56/19869  | 0.049952565 | 0.1502589 | 0.10560562 | MYL9/MYO5A/MYL12A/MYH9/ | 8 0.142857142857143  |
| GO:0005201 MF | GO:0005201 extracellular<br>matrix       | 67/1421 | 173/18432 | 1.835246492 | 1.8205645 | 1.44694697 | COL1A1/COL1A2/TNC/TGFBI | 67 0.38728323699422  |
| GO:0045296 MF | GO:0045296 cadherin<br>binding           | 90/1421 | 333/18432 | 7.165206674 | 3.5539425 | 2.82459989 | CDH11/CALD1/CAPZB/LIMA1 | 90 0.27027027027027  |
| GO:0003779 MF | GO:0003779 actin binding                 | 94/1421 | 439/18432 | 3.846816217 | 1.2720138 | 1.01097029 | /FLNA/TAGLN2/PPFIBP1/RP | 94 0.214123006833713 |
| GO:0005178 MF | GO:0005178 integrin<br>binding           | 49/1421 | 156/18432 | 3.942829267 | 9.7782165 | 7.77152400 | S26/ANK3/DNAJB1/HSPA1A/ | 49 0.314102564102564 |
| GO:0019838 MF | GO:0019838 growth factor<br>binding      | 44/1421 | 132/18432 | 1.612034294 | 3.1982760 | 2.54192355 | CALD1/S100A4/MARCKS/EPB | 44 0.333333333333333 |
| GO:0005518 MF | GO:0005518 collagen                      | 31/1421 | 69/18432  | 5.149983187 | 8.5146388 | 6.76725860 | 41L2/TPM4/ANTXR1/CAPZB/ | 31 0.449275362318841 |
| GO:0005539 MF | GO:0005539 glycosaminogl<br>ycan binding | 60/1421 | 237/18432 | 7.816332817 | 1.1076860 | 8.80365906 | ENAH/LIMA1/WIPF1/TPM1/F | 60 0.253164556962025 |
| GO:0051015 MF | GO:0051015 actin<br>filament             | 56/1421 | 219/18432 | 5.240871853 | 6.4986810 | 5.16501712 | TGFBI/COL5A1/COL3A1/CCN | 56 0.255707762557078 |

|               |                                      |         |           |                          |                        |                          |                                                 |                      |
|---------------|--------------------------------------|---------|-----------|--------------------------|------------------------|--------------------------|-------------------------------------------------|----------------------|
| GO:0003735 MF | GO:0003735 structural constituent    | 49/1421 | 176/18432 | 9.283127638<br>34181e-16 | 1.0232069<br>5747056e- | 8.13223696<br>037195e-14 | RPS26/RPL22L1/RPS21/RPS15A/RPL39/RPS4Y1/MRPS24  | 49 0.278409090909091 |
| GO:0008201 MF | GO:0008201 heparin binding           | 45/1421 | 171/18432 | 1.292683005<br>658e-13   | 1.2823415<br>4161274e- | 1.01917849<br>603983e-11 | THBS2/COL5A1/LTBP2/CCN5/PCOLCE/POSTN/FSTL1/GPN  | 45 0.263157894736842 |
| GO:0030020 MF | GO:0030020 extracellular             | 21/1421 | 41/18432  | 2.208553160              | 1.9917133              | 1.58297255               | COL1A1/COL1A2/COL14A1/C                         | 21 0.51219512195122  |
| GO:0023026 MF | GO:0023026 MHC class II              | 16/1421 | 27/18432  | 8.279803748              | 6.8446377              | 5.43997632               | HSPA8/HSP90AA1/ATP1B1/H                         | 16 0.592592592592593 |
| GO:0048407 MF | GO:0048407 platelet-                 | 10/1421 | 11/18432  | 7.371247794              | 5.6248290              | 4.47049765               | COL1A1/COL1A2/COL5A1/CO                         | 10 0.909090909090909 |
| GO:1901681 MF | GO:1901681 sulfur compound           | 52/1421 | 270/18432 | 6.146470840<br>9078e-10  | 4.3552136<br>2441467e- | 3.46143357<br>882703e-08 | THBS2/COL5A1/LTBP2/CCN5/PCOLCE/POSTN/FSTL1/GPN  | 52 0.192592592592593 |
| GO:0004857 MF | GO:0004857 enzyme inhibitor          | 66/1421 | 395/18432 | 1.702193100<br>18768e-09 | 1.1257170<br>3692412e- | 8.94696583<br>888122e-08 | COL6A3/SERPINH1/SOCS3/TIMP2/HEXIM1/SH3BP5/PPP1  | 66 0.167088607594937 |
| GO:0023023 MF | GO:0023023 MHC protein               | 16/1421 | 36/18432  | 2.379127406              | 1.4750589              | 1.17234633               | HSPA8/HSP90AA1/ATP1B1/H                         | 16 0.444444444444444 |
| GO:0044548 MF | GO:0044548 S100 protein              | 10/1421 | 14/18432  | 5.403337406              | 3.1530062              | 2.50594409               | S100A1/S100B/ANXA2/S100                         | 10 0.714285714285714 |
| GO:0061134 MF | GO:0061134 peptidase regulator       | 45/1421 | 232/18432 | 6.923674413<br>38593e-09 | 3.8157138<br>9893269e- | 3.03265037<br>171115e-07 | COL6A3/SERPINH1/PCOLCE/TIMP2/ANOS1/TIMP4/PCSK1  | 45 0.193965517241379 |
| GO:0019199 MF | GO:0019199 transmembrane             | 23/1421 | 79/18432  | 1.529766443              | 7.9869911              | 6.34789510               | PDGFRA/LTBP1/PDGFRB/PDG                         | 23 0.291139240506329 |
| GO:0043394 MF | GO:0043394 proteoglycan              | 15/1421 | 36/18432  | 2.217663691              | 1.0999611              | 8.74226371               | TNC/COL5A1/GPNMB/CTSK/C                         | 15 0.416666666666667 |
| GO:0050840 MF | GO:0050840 extracellular             | 18/1421 | 56/18432  | 1.042400299              | 4.8587314              | 3.86161912               | TGFBI/ECM1/LGALS1/SMOC1                         | 18 0.321428571428571 |
| GO:0005200 MF | GO:0005200 structural                | 26/1421 | 107/18432 | 1.077541251              | 4.8587314              | 3.86161912               | LMNA/TUBB/TUBA1A/ACTG1/                         | 26 0.242990654205607 |
| GO:0140297 MF | GO:0140297 DNA-binding transcription | 70/1421 | 476/18432 | 1.168152995<br>54066e-07 | 5.0382946<br>5902754e- | 4.00433223<br>642999e-06 | JUN/FOXP1/FOS/TWIST1/ACTB/RBPJ/PRRX1/FLNA/ID4/  | 70 0.147058823529412 |
| GO:0061629 MF | GO:0061629 RNA polymerase            | 56/1421 | 350/18432 | 1.326963932<br>7155e-07  | 5.4847842<br>5522407e- | 4.35919291<br>931539e-06 | JUN/FOXP1/FOS/ACTB/RBPJ/PRRX1/ID4/NOTCH2/HES1/  | 56 0.16              |
| GO:0004866 MF | GO:0004866 endopeptidase             | 34/1421 | 180/18432 | 8.914334236              | 3.5372078              | 2.81129951               | COL6A3/SERPINH1/TIMP2/A                         | 34 0.188888888888889 |
| GO:0046332 MF | GO:0046332 SMAD binding              | 20/1421 | 78/18432  | 1.249790349              | 4.7684308              | 3.78985008               | COL1A2/COL5A2/COL3A1/JU                         | 20 0.256410256410256 |
| GO:0001540 MF | GO:0001540 amyloid-beta              | 21/1421 | 85/18432  | 1.320549961              | 4.8517983              | 3.85610885               | ITM2B/ITM2A/CRYAB/ITM2C                         | 21 0.247058823529412 |
| GO:0019955 MF | GO:0019955 cytokine                  | 29/1421 | 144/18432 | 1.446156679              | 5.1235265              | 4.07207275               | NBL1/LTBP1/LTBP3/COMP/L                         | 29 0.201388888888889 |
| GO:0003924 MF | GO:0003924 GTPase activity           | 51/1421 | 331/18432 | 1.520323327<br>47054e-06 | 5.2005542<br>7879578e- | 4.13329282<br>132644e-05 | TUBB/SEPTIN11/TUBB4B/RG S16/GEM/RASD1/TUBB2A/TU | 51 0.154078549848943 |
| GO:0004714 MF | GO:0004714 transmembrane             | 17/1421 | 60/18432  | 1.737091663              | 5.7439830              | 4.56519879               | PDGFRA/PDGFRB/PDGFRL/EF                         | 17 0.283333333333333 |
| GO:0061135 MF | GO:0061135 endopeptidase             | 35/1421 | 194/18432 | 1.883850623              | 6.0283219              | 4.79118545               | COL6A3/SERPINH1/TIMP2/A                         | 35 0.180412371134021 |
| GO:0030021 MF | GO:0030021 extracellular             | 10/1421 | 22/18432  | 1.964747663              | 6.0907177              | 4.84077631               | VCAN/ASP/OGN/LUM/PRELP                          | 10 0.454545454545455 |
| GO:0030414 MF | GO:0030414 peptidase                 | 34/1421 | 187/18432 | 2.195492138              | 6.5997824              | 5.24537037               | COL6A3/SERPINH1/TIMP2/A                         | 34 0.181818181818182 |
| GO:0019211 MF | GO:0019211 phosphatase               | 10/1421 | 23/18432  | 3.235828663              | 9.4410059              | 7.50351600               | MAP2K6/BMP2/CALM2/PPP1R                         | 10 0.434782608695652 |
| GO:0019887 MF | GO:0019887 protein                   | 37/1421 | 218/18432 | 4.337003807              | 0.0001229              | 9.76967173               | SOCS3/CCNL1/HEXIM1/SH3B                         | 37 0.169724770642202 |
| GO:0019209 MF | GO:0019209 kinase                    | 25/1421 | 121/18432 | 4.661885823              | 0.0001284              | 0.00010209               | MAP2K6/GPRC5C/BMP2/CDKN                         | 25 0.206611570247934 |

|               |                                   |         |           |                          |                        |                          |                                                    |                      |
|---------------|-----------------------------------|---------|-----------|--------------------------|------------------------|--------------------------|----------------------------------------------------|----------------------|
| GO:0031625 MF | GO:0031625 ubiquitin protein      | 46/1421 | 299/18432 | 5.090068736<br>61107e-06 | 0.0001364<br>688699113 | 0.00010846<br>2631115838 | JUN/TUBB/ACTG1/DIO2/FOX<br>01/HSPA1A/UBB/HSPA1B/HS | 46 0.153846153846154 |
| GO:0019207 MF | GO:0019207 kinase                 | 40/1421 | 246/18432 | 5.353495848              | 0.0001397              | 0.00011107               | SOCS3/CCNL1/HEXIM1/PIK3                            | 40 0.16260162601626  |
| GO:0030295 MF | GO:0030295 protein                | 24/1421 | 115/18432 | 5.985181842              | 0.0001522              | 0.00012099               | MAP2K6/GPRC5C/BMP2/CDKN                            | 24 0.208695652173913 |
| GO:0097718 MF | GO:0097718 disordered             | 12/1421 | 35/18432  | 6.594447822              | 0.0001635              | 0.00012998               | HSPA1A/FN1/CALM2/HSP90A                            | 12 0.342857142857143 |
| GO:0044183 MF | GO:0044183 protein                | 17/1421 | 68/18432  | 1.116707968              | 0.0002701              | 0.00021474               | WIPF1/DNAJB1/HSPA1A/HSP                            | 17 0.25              |
| GO:0044389 MF | GO:0044389 ubiquitin-like protein | 47/1421 | 318/18432 | 1.201006481<br>57968e-05 | 0.0002836<br>662927921 | 0.00022545<br>2093910571 | JUN/TUBB/ACTG1/DIO2/FOX<br>01/HSPA1A/UBB/HSPA1B/HS | 47 0.147798742138365 |
| GO:0004867 MF | GO:0004867 serine-type            | 21/1421 | 98/18432  | 1.466151023              | 0.0003382              | 0.00026882               | COL6A3/SERPINH1/ANOS1/P                            | 21 0.214285714285714 |
| GO:0030246 MF | GO:0030246 carbohydrate binding   | 42/1421 | 275/18432 | 1.546201948<br>43777e-05 | 0.0003485<br>982574659 | 0.00027705<br>8674492796 | MRC2/VCAN/LGALS1/GALNT1<br>/P4HA2/CHI3L1/GALNT15/P | 42 0.152727272727273 |
| GO:0098631 MF | GO:0098631 cell adhesion          | 16/1421 | 64/18432  | 2.011746731              | 0.0004434              | 0.00035246               | ITGA11/ITGA10/GLDN/ANXA                            | 16 0.25              |
| GO:0017124 MF | GO:0017124 SH3 domain             | 24/1421 | 125/18432 | 2.616562628              | 0.0005642              | 0.00044846               | ENAH/WIPF1/DPYSL3/SH3BP                            | 24 0.192             |
| GO:0140416 MF | GO:0140416 transcription          | 9/1421  | 23/18432  | 2.837414317              | 0.0005988              | 0.00047597               | ID4/ID3/DNAJB1/HSPA1A/D                            | 9 0.391304347826087  |
| GO:0042277 MF | GO:0042277 peptide binding        | 47/1421 | 330/18432 | 3.161492730<br>11859e-05 | 0.0006533<br>751642245 | 0.00051928<br>9047118163 | SLC40A1/CRIP1/ITM2B/PPI<br>C/ITM2A/CRYAB/NFKBIA/IT | 47 0.142424242424242 |
| GO:0032395 MF | GO:0032395 MHC class II           | 6/1421  | 10/18432  | 3.327298782              | 0.0006694              | 0.00053207               | HLA-DRB1/HLA-DRA/HLA-                              | 6 0.6                |
| GO:0005161 MF | GO:0005161 platelet-              | 7/1421  | 14/18432  | 3.374276245              | 0.0006694              | 0.00053207               | PDGFRA/PDGFRA/VEGFA/ITG                            | 7 0.5                |
| GO:0003925 MF | GO:0003925 G protein              | 12/1421 | 41/18432  | 4.044303297              | 0.0007866              | 0.00062521               | RAB1A/RAP2B/RAC1/RAB5C/                            | 12 0.292682926829268 |
| GO:0051087 MF | GO:0051087 chaperone              | 21/1421 | 105/18432 | 4.378743505              | 0.0008353              | 0.00066390               | DNAJB1/HES1/HSPA8/DNAJA                            | 21 0.2               |
| GO:0060090 MF | GO:0060090 molecular adaptor      | 63/1421 | 492/18432 | 4.642839730<br>32948e-05 | 0.0008689<br>994363182 | 0.00069066<br>2752336997 | COL1A2/COL14A1/DAB2/SEP<br>TIN11/FUS/RETREG1/ANK3/ | 63 0.128048780487805 |
| GO:0005080 MF | GO:0005080 protein                | 14/1421 | 55/18432  | 5.289798271              | 0.0009717              | 0.00077233               | MARCKS/FLNA/TRPV4/SQSTM                            | 14 0.254545454545455 |
| GO:0002020 MF | GO:0002020 protease               | 25/1421 | 139/18432 | 5.616220505              | 0.0010129              | 0.00080508               | COL1A1/COL1A2/COL3A1/EC                            | 25 0.179856115107914 |
| GO:0140375 MF | GO:0140375 immune                 | 26/1421 | 148/18432 | 6.083778753              | 0.0010533              | 0.00083718               | OSMR/CD44/IFNGR2/HLA-                              | 26 0.175675675675676 |
| GO:0008009 MF | GO:0008009 chemokine              | 13/1421 | 49/18432  | 6.101221505              | 0.0010533              | 0.00083718               | CCL20/CCL3/CCL3L1/CXCL1                            | 13 0.26530612244898  |
| GO:0050431 MF | GO:0050431 transforming           | 9/1421  | 25/18432  | 6.158707257              | 0.0010533              | 0.00083718               | LTBP1/LTBP3/LTBP4/TGFBR                            | 9 0.36               |
| GO:0005126 MF | GO:0005126 cytokine               | 40/1421 | 273/18432 | 6.348167580              | 0.0010673              | 0.00084830               | ECM1/OSMR/PIK3R1/CFLAR/                            | 40 0.146520146520147 |
| GO:0034713 MF | GO:0034713 type I                 | 6/1421  | 11/18432  | 6.841022962              | 0.0011310              | 0.00089893               | TGFB1/SNX6/FKBP1A/SMAD7                            | 6 0.545454545454545  |
| GO:0001968 MF | GO:0001968 fibronectin            | 10/1421 | 31/18432  | 7.085896960              | 0.0011523              | 0.00091584               | MMP2/CTSK/IGFBP6/SDC4/C                            | 10 0.32258064516129  |
| GO:0042605 MF | GO:0042605 peptide                | 11/1421 | 37/18432  | 7.207343020              | 0.0011531              | 0.00091651               | HLA-DRB1/HLA-DRA/HLA-                              | 11 0.297297297297297 |
| GO:0072542 MF | GO:0072542 protein                | 7/1421  | 16/18432  | 9.799817708              | 0.0015430              | 0.00122640               | CALM2/PPP1R15A/CALM3/PP                            | 7 0.4375             |
| GO:0016504 MF | GO:0016504 peptidase              | 12/1421 | 45/18432  | 0.000110351              | 0.0016969              | 0.00134872               | PCOLCE/PCOLCE2/FN1/CAV1                            | 12 0.266666666666667 |
| GO:0044325 MF | GO:0044325 transmembrane          | 23/1421 | 128/18432 | 0.000111193              | 0.0016969              | 0.00134872               | FLNA/ACTN1/FHL1/ANK3/FX                            | 23 0.1796875         |
| GO:0033218 MF | GO:0033218 amide binding          | 53/1421 | 408/18432 | 0.000125263<br>705931023 | 0.0018827<br>514588420 | 0.00149637<br>186191924  | SLC40A1/CRIP1/ITM2B/PPI<br>C/ITM2A/CRYAB/NFKBIA/IT | 53 0.129901960784314 |

|               |                                    |         |           |             |           |            |                                                          |                         |                      |
|---------------|------------------------------------|---------|-----------|-------------|-----------|------------|----------------------------------------------------------|-------------------------|----------------------|
| GO:0005525 MF | GO:0005525 GTP binding             | 50/1421 | 379/18432 | 0.000131437 | 0.0019460 | 0.00154669 | TUBB/SEPTIN11/TUBA1A/TU<br>731004703 631217412 066021245 | BB4B/GEM/RASD1/TUBB2A/T | 50 0.131926121372032 |
| GO:0009055 MF | GO:0009055 electron                | 22/1421 | 122/18432 | 0.000147225 | 0.0021477 | 0.00170699 | P4HA2/NDUFA4/NDUFB1/UQC                                  |                         | 22 0.180327868852459 |
| GO:0043539 MF | GO:0043539 protein                 | 13/1421 | 54/18432  | 0.000179259 | 0.0025771 | 0.00204829 | MAP2K6/BMP2/CKS2/CALM2/                                  |                         | 13 0.240740740740741 |
| GO:0051082 MF | GO:0051082 unfolded                | 22/1421 | 124/18432 | 0.000187900 | 0.0026628 | 0.00211635 | SERPINH1/TUBB4B/DNAJB1/                                  |                         | 22 0.17741935483871  |
| GO:0017134 MF | GO:0017134 fibroblast              | 8/1421  | 23/18432  | 0.000209807 | 0.0029313 | 0.00232981 | S100A13/FGFRL1/FGFR1/FG                                  |                         | 8 0.347826086956522  |
| GO:0015026 MF | GO:0015026 coreceptor              | 12/1421 | 48/18432  | 0.000215399 | 0.0029677 | 0.00235868 | GPC6/CSPG4/TGFBR3/CD4/C                                  |                         | 12 0.25              |
| GO:0005024 MF | GO:0005024 transforming            | 6/1421  | 13/18432  | 0.000221997 | 0.0029759 | 0.00236523 | LTBP1/LTBP4/TGFBR3/ENG/                                  |                         | 6 0.461538461538462  |
| GO:0035259 MF | GO:0035259 nuclear                 | 6/1421  | 13/18432  | 0.000221997 | 0.0029759 | 0.00236523 | NR4A1/CEBPB/YWHAH/NR4A2                                  |                         | 6 0.461538461538462  |
| GO:0016209 MF | GO:0016209 antioxidant             | 17/1421 | 85/18432  | 0.000227148 | 0.0030044 | 0.00238784 | GPX8/PRDX4/GPX3/SOD2/TX                                  |                         | 17 0.2               |
| GO:0140678 MF | GO:0140678 molecular               | 18/1421 | 93/18432  | 0.000231620 | 0.0030232 | 0.00240281 | TIMP2/ID4/ID3/DNAJB1/HS                                  |                         | 18 0.193548387096774 |
| GO:0098641 MF | GO:0098641 cadherin                | 7/1421  | 18/18432  | 0.000237605 | 0.0030611 | 0.00243290 | ANXA2/ANXA1/S100A11/RAB                                  |                         | 7 0.388888888888889  |
| GO:0042379 MF | GO:0042379 chemokine               | 15/1421 | 71/18432  | 0.000279543 | 0.0035552 | 0.00282561 | CCL20/CCL3/CCL3L1/CXCL1                                  |                         | 15 0.211267605633803 |
| GO:0004713 MF | GO:0004713 protein                 | 23/1421 | 138/18432 | 0.000350780 | 0.0044047 | 0.00350079 | PDGFRA/PDGFRB/PDGFR/EF                                   |                         | 23 0.166666666666667 |
| GO:0140313 MF | GO:0140313 molecular               | 6/1421  | 14/18432  | 0.000363188 | 0.0045035 | 0.00357931 | C1R/PRDX4/CDKN1A/LAPTM5                                  |                         | 6 0.428571428571429  |
| GO:0019003 MF | GO:0019003 GDP binding             | 15/1421 | 73/18432  | 0.000384210 | 0.0047053 | 0.00373975 | GEM/RAN/RHEB/RAP2B/RAB3                                  |                         | 15 0.205479452054795 |
| GO:0048306 MF | GO:0048306 calcium-                | 16/1421 | 81/18432  | 0.000398157 | 0.0048167 | 0.00382824 | S100A4/S100A1/S100A13/T                                  |                         | 16 0.197530864197531 |
| GO:0140677 MF | GO:0140677 molecular               | 13/1421 | 59/18432  | 0.000456272 | 0.0054532 | 0.00433415 | HTRA1/DNAJB1/DNAJA1/DNA                                  |                         | 13 0.220338983050847 |
| GO:0042608 MF | GO:0042608 T cell                  | 5/1421  | 10/18432  | 0.000490404 | 0.0057766 | 0.00459118 | HLA-DRB1/HLA-                                            |                         | 5 0.5                |
| GO:0031072 MF | GO:0031072 heat shock              | 21/1421 | 124/18432 | 0.000499529 | 0.0057766 | 0.00459118 | DNAJB1/HSPA1A/HSPA1B/ZF                                  |                         | 21 0.169354838709677 |
| GO:0019001 MF | GO:0019001 guanyl<br>nucleotide    | 50/1421 | 401/18432 | 0.000506624 | 0.0057766 | 0.00459118 | TUBB/SEPTIN11/TUBA1A/TU<br>143581629 798900342 55238069  | BB4B/GEM/RASD1/TUBB2A/T | 50 0.124688279301746 |
| GO:0032561 MF | GO:0032561 guanyl<br>ribonucleotid | 50/1421 | 401/18432 | 0.000506624 | 0.0057766 | 0.00459118 | TUBB/SEPTIN11/TUBA1A/TU<br>143581629 798900342 55238069  | BB4B/GEM/RASD1/TUBB2A/T | 50 0.124688279301746 |
| GO:0005543 MF | GO:0005543 phospholipid<br>binding | 57/1421 | 474/18432 | 0.000535013 | 0.0060310 | 0.00479336 | THY1/EEA1/PLA2G2A/HSPA8<br>990421176 668011114 697159642 | /SERPINA5/SCIN/GSN/SDCB | 57 0.120253164556962 |
| GO:0008083 MF | GO:0008083 growth factor           | 25/1421 | 162/18432 | 0.000656660 | 0.0073191 | 0.00581713 | OGN/EFEMP1/CCN6/MIA/CLE                                  |                         | 25 0.154320987654321 |
| GO:0098632 MF | GO:0098632 cell-cell               | 12/1421 | 54/18432  | 0.000689408 | 0.0075931 | 0.00603486 | GLDN/ANXA2/ANXA1/S100A1                                  |                         | 12 0.222222222222222 |
| GO:0005546 MF | GO:0005546 phosphatidyl            | 16/1421 | 85/18432  | 0.000696548 | 0.0075931 | 0.00603486 | SCIN/GSN/SDCBP/ANXA2/PL                                  |                         | 16 0.188235294117647 |
| GO:0019864 MF | GO:0019864 IgG binding             | 5/1421  | 11/18432  | 0.000842066 | 0.0089355 | 0.00710176 | FCER1G/FCGR2A/FCGR3A/FC                                  |                         | 5 0.454545454545455  |
| GO:0005523 MF | GO:0005523 tropomyosin             | 6/1421  | 16/18432  | 0.000846713 | 0.0089355 | 0.00710176 | CALD1/TNNT3/NEBL/S100A6                                  |                         | 6 0.375              |
| GO:0016722 MF | GO:0016722 oxidoreductas           | 6/1421  | 16/18432  | 0.000846713 | 0.0089355 | 0.00710176 | CP/STEAP4/STEAP2/STEAP3                                  |                         | 6 0.375              |
| GO:0140662 MF | GO:0140662 ATP-dependent           | 10/1421 | 41/18432  | 0.000881425 | 0.0092039 | 0.00731509 | HSPA1A/HSPA1B/HSPA8/HSP                                  |                         | 10 0.24390243902439  |
| GO:0070851 MF | GO:0070851 growth factor           | 22/1421 | 140/18432 | 0.001054418 | 0.0108956 | 0.00865964 | PDGFRA/PDGFRB/ECM1/EFEM                                  |                         | 22 0.157142857142857 |
| GO:0019208 MF | GO:0019208 phosphatase             | 19/1421 | 114/18432 | 0.001104469 | 0.0112951 | 0.00897718 | ZEB2/PPP1R14B/RCAN1/MAP                                  |                         | 19 0.166666666666667 |
| GO:0047485 MF | GO:0047485 protein N-              | 18/1421 | 106/18432 | 0.001182865 | 0.0119734 | 0.00951628 | RBPJ/TBL1XR1/HSPA1A/RPS                                  |                         | 18 0.169811320754717 |

|               |                                      |         |           |             |           |            |                                                        |                      |
|---------------|--------------------------------------|---------|-----------|-------------|-----------|------------|--------------------------------------------------------|----------------------|
| GO:0046875 MF | GO:0046875 ephrin                    | 8/1421  | 29/18432  | 0.001211278 | 0.0121372 | 0.00964643 | AQP1/SDCBP/SIPA1L1/LYN/                                | 8 0.275862068965517  |
| GO:0030169 MF | GO:0030169 low-density               | 6/1421  | 17/18432  | 0.001223724 | 0.0121393 | 0.00964809 | MSR1/STAB1/TREM2/PLTP/C                                | 6 0.352941176470588  |
| GO:0030674 MF | GO:0030674 protein-<br>macromolecule | 43/1421 | 347/18432 | 0.001364658 | 0.0133235 | 0.01058928 | COL1A2/COL14A1/DAB2/FUS<br>/RETREG1/ANK3/COL11A2/H     | 43 0.123919308357349 |
| GO:0038024 MF | GO:0038024 cargo                     | 15/1421 | 82/18432  | 0.001369961 | 0.0133235 | 0.01058928 | DAB2/PRG4/SCARA3/LRP10/                                | 15 0.182926829268293 |
| GO:1901981 MF | GO:1901981 phosphatidyl              | 26/1421 | 180/18432 | 0.001407252 | 0.0135533 | 0.01077191 | SCIN/GSN/SDCBP/PHLDA1/P                                | 26 0.144444444444444 |
| GO:0071813 MF | GO:0071813 lipoprotein               | 8/1421  | 30/18432  | 0.001541464 | 0.0145631 | 0.01157450 | HSPD1/MSR1/STAB1/APOE/T                                | 8 0.266666666666667  |
| GO:0071814 MF | GO:0071814 protein-lipid             | 8/1421  | 30/18432  | 0.001541464 | 0.0145631 | 0.01157450 | HSPD1/MSR1/STAB1/APOE/T                                | 8 0.266666666666667  |
| GO:0016765 MF | GO:0016765 transferase               | 12/1421 | 59/18432  | 0.001573607 | 0.0147265 | 0.01170439 | DTWD1/SRM/GSTO1/RABGGTB                                | 12 0.203389830508475 |
| GO:0001664 MF | GO:0001664 G protein-                | 37/1421 | 289/18432 | 0.001605673 | 0.0148862 | 0.01183128 | FLNA/HSPA1A/HSPA1B/CTHR                                | 37 0.1280276816609   |
| GO:0001221 MF | GO:0001221 transcription             | 18/1421 | 109/18432 | 0.001641380 | 0.0149380 | 0.01187246 | FOS/TWIST1/SIX1/HES1/ZB                                | 18 0.165137614678899 |
| GO:1902936 MF | GO:1902936 phosphatidyl              | 18/1421 | 109/18432 | 0.001641380 | 0.0149380 | 0.01187246 | SCIN/GSN/SDCBP/ANXA2/PL                                | 18 0.165137614678899 |
| GO:0005160 MF | GO:0005160 transforming              | 7/1421  | 24/18432  | 0.001714705 | 0.0153186 | 0.01217494 | TGFB1/TGFBR3/SNX6/FKBP1                                | 7 0.291666666666667  |
| GO:0005540 MF | GO:0005540 hyaluronic                | 7/1421  | 24/18432  | 0.001714705 | 0.0153186 | 0.01217494 | VCAN/HAPLN1/ACAN/CD44/T                                | 7 0.291666666666667  |
| GO:0030546 MF | GO:0030546 signaling<br>receptor     | 57/1421 | 498/18432 | 0.001729524 | 0.0153186 | 0.01217494 | NBL1/SEMA3C/GPNMB/FBN1/<br>71339299 474614808 37061217 | 57 0.114457831325301 |
| GO:1990782 MF | GO:1990782 protein                   | 19/1421 | 119/18432 | 0.001857030 | 0.0163024 | 0.01295682 | PLCG2/PIK3R1/SQSTM1/HSP                                | 19 0.159663865546218 |
| GO:0004675 MF | GO:0004675 transmembrane             | 6/1421  | 19/18432  | 0.002347019 | 0.0204231 | 0.01623192 | LTBP1/LTBP4/TGFBR3/ENG/                                | 6 0.315789473684211  |
| GO:0004860 MF | GO:0004860 protein                   | 13/1421 | 70/18432  | 0.002426907 | 0.0209347 | 0.01663847 | SOCS3/HEXIM1/SH3BP5/CDK                                | 13 0.185714285714286 |
| GO:0035091 MF | GO:0035091 phosphatidyl              | 35/1421 | 277/18432 | 0.002634442 | 0.0225290 | 0.01790559 | THY1/EEA1/SCIN/GSN/SDCB                                | 35 0.126353790613718 |
| GO:0001848 MF | GO:0001848 complement                | 7/1421  | 26/18432  | 0.002844683 | 0.0241190 | 0.01916930 | CFH/CFB/CD59/ITGB2/VSIG                                | 7 0.269230769230769  |
| GO:0005172 MF | GO:0005172 vascular                  | 5/1421  | 14/18432  | 0.003000457 | 0.0252241 | 0.02004766 | VEGFA/ITGA5/CCDC88A/PGF                                | 5 0.357142857142857  |
| GO:0048018 MF | GO:0048018 receptor<br>ligand        | 55/1421 | 491/18432 | 0.003285085 | 0.0273849 | 0.02176496 | NBL1/SEMA3C/GPNMB/FBN1/<br>96840538 183248583 58587849 | 55 0.112016293279022 |
| GO:0019210 MF | GO:0019210 kinase                    | 13/1421 | 74/18432  | 0.004019478 | 0.0332276 | 0.02640867 | SOCS3/HEXIM1/SH3BP5/CDK                                | 13 0.175675675675676 |
| GO:0048185 MF | GO:0048185 activin                   | 5/1421  | 15/18432  | 0.004217714 | 0.0345782 | 0.02748210 | TGFBR3/FKBP1A/SMAD7/ENG                                | 5 0.333333333333333  |
| GO:0019902 MF | GO:0019902 phosphatase               | 26/1421 | 195/18432 | 0.004322837 | 0.0351496 | 0.02793619 | FOXO1/CARHSP1/PIK3R1/MA                                | 26 0.133333333333333 |
| GO:0043236 MF | GO:0043236 laminin                   | 7/1421  | 28/18432  | 0.004471321 | 0.0357705 | 0.02842970 | ECM1/LGALS1/CTSS/ADAM9/                                | 7 0.25               |
| GO:0043495 MF | GO:0043495 protein-                  | 7/1421  | 28/18432  | 0.004471321 | 0.0357705 | 0.02842970 | RETREG1/SLC9A3R2/EPB41L                                | 7 0.25               |
| GO:0005522 MF | GO:0005522 profilin                  | 4/1421  | 10/18432  | 0.005062257 | 0.0389283 | 0.03093946 | ENAH/WIPF1/ACTG1/VASP                                  | 4 0.4                |
| GO:0016175 MF | GO:0016175 superoxide-               | 4/1421  | 10/18432  | 0.005062257 | 0.0389283 | 0.03093946 | CYBB/NCF1/NCF2/CYBA                                    | 4 0.4                |
| GO:0030957 MF | GO:0030957 Tat protein               | 4/1421  | 10/18432  | 0.005062257 | 0.0389283 | 0.03093946 | ACTB/DNAJA1/GABARAPL1/M                                | 4 0.4                |
| GO:0050786 MF | GO:0050786 RAGE receptor             | 4/1421  | 10/18432  | 0.005062257 | 0.0389283 | 0.03093946 | S100A4/S100A13/S100B/HM                                | 4 0.4                |
| GO:0070008 MF | GO:0070008 serine-type               | 4/1421  | 10/18432  | 0.005062257 | 0.0389283 | 0.03093946 | CPVL/TPP1/CTSA/PRCP                                    | 4 0.4                |
| GO:0042056 MF | GO:0042056 chemoattracta             | 8/1421  | 36/18432  | 0.005274056 | 0.0400286 | 0.03181395 | GPNMB/FGF2/VEGFA/CCL3/P                                | 8 0.222222222222222  |
| GO:0004602 MF | GO:0004602 glutathione               | 6/1421  | 22/18432  | 0.005286044 | 0.0400286 | 0.03181395 | GPX8/GPX3/PTGES/ALOX5AP                                | 6 0.272727272727273  |

|               |                          |         |           |             |           |            |                          |    |                   |
|---------------|--------------------------|---------|-----------|-------------|-----------|------------|--------------------------|----|-------------------|
| GO:0051787 MF | GO:0051787 misfolded     | 7/1421  | 29/18432  | 0.005508607 | 0.0410867 | 0.03265490 | HSPA1A/HSPA1B/HSPA8/DNA  | 7  | 0.241379310344828 |
| GO:0051861 MF | GO:0051861 glycolipid    | 7/1421  | 29/18432  | 0.005508607 | 0.0410867 | 0.03265490 | THY1/MANF/LYN/TREM2/TPP  | 7  | 0.241379310344828 |
| GO:0001222 MF | GO:0001222 transcription | 9/1421  | 44/18432  | 0.005656264 | 0.0413332 | 0.03285080 | HES1/ZBTB16/NR1D1/ETS1/  | 9  | 0.204545454545455 |
| GO:0001618 MF | GO:0001618 virus         | 13/1421 | 77/18432  | 0.005696983 | 0.0413332 | 0.03285080 | ITGB5/HSPA1A/HSPA1B/CD5  | 13 | 0.168831168831169 |
| GO:0005521 MF | GO:0005521 lamin binding | 5/1421  | 16/18432  | 0.005749987 | 0.0413332 | 0.03285080 | SUN2/SYNE1/PPP1CC/IFI27  | 5  | 0.3125            |
| GO:0008191 MF | GO:0008191 metalloendope | 5/1421  | 16/18432  | 0.005749987 | 0.0413332 | 0.03285080 | TIMP2/TIMP4/SPOCK1/BST2  | 5  | 0.3125            |
| GO:0031435 MF | GO:0031435 mitogen-      | 5/1421  | 16/18432  | 0.005749987 | 0.0413332 | 0.03285080 | DIXDC1/DAZAP2/MAP3K11/S  | 5  | 0.3125            |
| GO:0005516 MF | GO:0005516 calmodulin    | 26/1421 | 200/18432 | 0.006038982 | 0.0430983 | 0.03425367 | CALD1/MARCKS/AEBP1/EEA1  | 26 | 0.13              |
| GO:0051020 MF | GO:0051020 GTPase        | 36/1421 | 303/18432 | 0.006321570 | 0.0447888 | 0.03559723 | RIN2/FLNA/FARP1/NDRG1/R  | 36 | 0.118811881188119 |
| GO:0140272 MF | GO:0140272 exogenous     | 13/1421 | 78/18432  | 0.006366153 | 0.0447888 | 0.03559723 | ITGB5/HSPA1A/HSPA1B/CD5  | 13 | 0.166666666666667 |
| GO:0035035 MF | GO:0035035 histone       | 6/1421  | 23/18432  | 0.006692811 | 0.0467554 | 0.03716023 | EGR1/GLI3/CEBPB/CITED2/  | 6  | 0.260869565217391 |
| GO:0001851 MF | GO:0001851 complement    | 4/1421  | 11/18432  | 0.007473795 | 0.0518461 | 0.04120627 | CFH/ITGB2/VSIG4/ITGAM    | 4  | 0.363636363636364 |
| GO:0005001 MF | GO:0005001 transmembrane | 5/1421  | 17/18432  | 0.007635930 | 0.0521084 | 0.04141469 | PTPRD/PTPRC/PTPRE/PTPRB  | 5  | 0.294117647058824 |
| GO:0019198 MF | GO:0019198 transmembrane | 5/1421  | 17/18432  | 0.007635930 | 0.0521084 | 0.04141469 | PTPRD/PTPRC/PTPRE/PTPRB  | 5  | 0.294117647058824 |
| GO:0015453 MF | GO:0015453 oxidoreductio | 12/1421 | 71/18432  | 0.007669183 | 0.0521084 | 0.04141469 | NDUFA4/NDUFB1/COX7A1/ND  | 12 | 0.169014084507042 |
| GO:0019865 MF | GO:0019865 immunoglobuli | 6/1421  | 24/18432  | 0.008352179 | 0.0559821 | 0.04449347 | FCER1G/FCGR2A/FCGR3A/FC  | 6  | 0.25              |
| GO:0042974 MF | GO:0042974 nuclear       | 6/1421  | 24/18432  | 0.008352179 | 0.0559821 | 0.04449347 | HMGAI1/NR4A2/NRIP1/ACTN4 | 6  | 0.25              |
| GO:0004601 MF | GO:0004601 peroxidase    | 10/1421 | 55/18432  | 0.008610527 | 0.0573264 | 0.04556188 | GPX8/PRDX4/GPX3/PRDX1/P  | 10 | 0.181818181818182 |
| GO:0048020 MF | GO:0048020 CCR chemokine | 9/1421  | 47/18432  | 0.008834911 | 0.0584282 | 0.04643753 | CCL20/CCL3/CCL3L1/CCL2/  | 9  | 0.191489361702128 |
| GO:0005125 MF | GO:0005125 cytokine      | 29/1421 | 237/18432 | 0.009009529 | 0.0591884 | 0.04704173 | GDF10/SPP1/NAMPT/BMP2/F  | 29 | 0.122362869198312 |
| GO:0050699 MF | GO:0050699 WW domain     | 7/1421  | 32/18432  | 0.009704163 | 0.0633324 | 0.05033530 | ENAH/TCEAL6/TCEAL2/TCEA  | 7  | 0.21875           |
| GO:0005547 MF | GO:0005547 phosphatidyl  | 8/1421  | 40/18432  | 0.010196659 | 0.0661116 | 0.05254419 | FUNDC2/ADAP2/IQGAP2/IQG  | 8  | 0.2               |
| GO:0008179 MF | GO:0008179 adenylate     | 4/1421  | 12/18432  | 0.010534593 | 0.0674213 | 0.05358513 | CALM2/CAP1/CALM3/CALM1   | 4  | 0.333333333333333 |
| GO:0017154 MF | GO:0017154 semaphorin    | 4/1421  | 12/18432  | 0.010534593 | 0.0674213 | 0.05358513 | NRP2/NRP1/PLXND1/PLXNB2  | 4  | 0.333333333333333 |
| GO:0017022 MF | GO:0017022 myosin        | 12/1421 | 74/18432  | 0.010633994 | 0.0676212 | 0.05374400 | CALD1/MYL9/GSN/LARP6/PY  | 12 | 0.162162162162162 |
| GO:0016684 MF | GO:0016684 oxidoreductas | 10/1421 | 57/18432  | 0.011060233 | 0.0698837 | 0.05554217 | GPX8/PRDX4/GPX3/PRDX1/P  | 10 | 0.175438596491228 |
| GO:0070888 MF | GO:0070888 E-box binding | 9/1421  | 49/18432  | 0.011604241 | 0.0728570 | 0.05790524 | TCF4/TWIST1/ZEB1/HES1/S  | 9  | 0.183673469387755 |
| GO:0001965 MF | GO:0001965 G-protein     | 6/1421  | 26/18432  | 0.012519829 | 0.0776229 | 0.06169310 | LPAR1/RGS1/RGS10/CCDC88  | 6  | 0.230769230769231 |
| GO:0070696 MF | GO:0070696 transmembrane | 6/1421  | 26/18432  | 0.012519829 | 0.0776229 | 0.06169310 | MAGI2/BMP2/INHBA/BMP6/P  | 6  | 0.230769230769231 |
| GO:0005520 MF | GO:0005520 insulin-like  | 5/1421  | 19/18432  | 0.012614492 | 0.0777240 | 0.06177348 | IGFBP4/IGFBP7/IGFBP6/IG  | 5  | 0.263157894736842 |
| GO:0019843 MF | GO:0019843 rRNA binding  | 11/1421 | 67/18432  | 0.012915188 | 0.0790856 | 0.06285559 | CAVIN1/RPS4Y1/MRPS6/RPS  | 11 | 0.164179104477612 |
| GO:0042287 MF | GO:0042287 MHC protein   | 8/1421  | 42/18432  | 0.013656982 | 0.0831148 | 0.06605799 | TUBB/LAG3/TUBB4B/COL2A1  | 8  | 0.19047619047619  |
| GO:0031994 MF | GO:0031994 insulin-like  | 4/1421  | 13/18432  | 0.014301712 | 0.0859836 | 0.06833800 | IGFBP4/IGFBP6/IGFBP5/IT  | 4  | 0.307692307692308 |
| GO:0050998 MF | GO:0050998 nitric-oxide  | 4/1421  | 13/18432  | 0.014301712 | 0.0859836 | 0.06833800 | ACTB/CAV1/CD74/CALM3     | 4  | 0.307692307692308 |
| GO:0001671 MF | GO:0001671 ATPase        | 6/1421  | 27/18432  | 0.015071643 | 0.0889944 | 0.07073095 | DNAJB1/DNAJA1/DNAJB4/AT  | 6  | 0.222222222222222 |
| GO:0008198 MF | GO:0008198 ferrous iron  | 6/1421  | 27/18432  | 0.015071643 | 0.0889944 | 0.07073095 | CDO1/TF/FTL/FTL1/EGLN3/  | 6  | 0.222222222222222 |

|               |                          |         |           |             |           |            |                          |    |                   |
|---------------|--------------------------|---------|-----------|-------------|-----------|------------|--------------------------|----|-------------------|
| GO:0038187 MF | GO:0038187 pattern       | 6/1421  | 27/18432  | 0.015071643 | 0.0889944 | 0.07073095 | CD14/CLEC7A/MARCO/TLR4/  | 6  | 0.222222222222222 |
| GO:0008013 MF | GO:0008013 beta-catenin  | 13/1421 | 87/18432  | 0.015593845 | 0.0914761 | 0.07270333 | GJA1/TCF4/TBL1XR1/GLI3/  | 13 | 0.149425287356322 |
| GO:0048156 MF | GO:0048156 tau protein   | 8/1421  | 43/18432  | 0.015676352 | 0.0914761 | 0.07270333 | ACTB/S100B/HSP90AA1/APO  | 8  | 0.186046511627907 |
| GO:0016505 MF | GO:0016505 peptidase     | 5/1421  | 20/18432  | 0.015773786 | 0.0915064 | 0.07272739 | RPS27L/EBAG9/PYCARD/CTS  | 5  | 0.25              |
| GO:0001786 MF | GO:0001786 phosphatidyls | 10/1421 | 61/18432  | 0.017497855 | 0.1009178 | 0.08020742 | HSPA8/SCIN/ANXA2/TREM2/  | 10 | 0.163934426229508 |
| GO:0015036 MF | GO:0015036 disulfide     | 8/1421  | 44/18432  | 0.017903038 | 0.1026578 | 0.08159036 | QSOX1/GLRX/TXN/GLRX2/GS  | 8  | 0.181818181818182 |
| GO:0032036 MF | GO:0032036 myosin heavy  | 4/1421  | 14/18432  | 0.018822214 | 0.1073082 | 0.08528637 | MYL9/MYL12A/PDLIM2/MYL1  | 4  | 0.285714285714286 |
| GO:0001846 MF | GO:0001846 opsonin       | 5/1421  | 21/18432  | 0.019419191 | 0.1094536 | 0.08699147 | CFH/ITGB2/VSIG4/ITGAM/C  | 5  | 0.238095238095238 |
| GO:0036122 MF | GO:0036122 BMP binding   | 5/1421  | 21/18432  | 0.019419191 | 0.1094536 | 0.08699147 | NBL1/COMP/CHRDL2/ENG/BM  | 5  | 0.238095238095238 |
| GO:0019903 MF | GO:0019903 protein       | 19/1421 | 149/18432 | 0.020633493 | 0.1152923 | 0.09163199 | FOXO1/PIK3R1/PPP1R15A/P  | 19 | 0.12751677852349  |
| GO:0016922 MF | GO:0016922 nuclear       | 18/1421 | 139/18432 | 0.020687542 | 0.1152923 | 0.09163199 | FOXP1/NR4A1/HMGA1/JUND/  | 18 | 0.129496402877698 |
| GO:0003785 MF | GO:0003785 actin monomer | 6/1421  | 29/18432  | 0.021211519 | 0.1163810 | 0.09249724 | LIMA1/TMSB4X/MTSS1/TMSB  | 6  | 0.206896551724138 |
| GO:0001530 MF | GO:0001530 lipopolysacch | 7/1421  | 37/18432  | 0.021234847 | 0.1163810 | 0.09249724 | PSMB4/HSPD1/CD14/TREM2/  | 7  | 0.189189189189189 |
| GO:0035198 MF | GO:0035198 miRNA binding | 7/1421  | 37/18432  | 0.021234847 | 0.1163810 | 0.09249724 | SOCS3/SOX4/KCNQ1OT1/NEA  | 7  | 0.189189189189189 |
| GO:0055106 MF | GO:0055106 ubiquitin-    | 5/1421  | 22/18432  | 0.023575999 | 0.1266660 | 0.10067153 | RPS20/RPS15/RPS7/RPL11/  | 5  | 0.227272727272727 |
| GO:0005545 MF | GO:0005545 1-            | 4/1421  | 15/18432  | 0.024132941 | 0.1266660 | 0.10067153 | EEA1/SCIN/SNX10/PICALM   | 4  | 0.266666666666667 |
| GO:0015929 MF | GO:0015929 hexosaminidas | 4/1421  | 15/18432  | 0.024132941 | 0.1266660 | 0.10067153 | HEXB/OGA/HYAL2/CEMIP2    | 4  | 0.266666666666667 |
| GO:0022858 MF | GO:0022858 alanine       | 4/1421  | 15/18432  | 0.024132941 | 0.1266660 | 0.10067153 | SLC3A2/SLC6A6/SLC38A2/S  | 4  | 0.266666666666667 |
| GO:0031005 MF | GO:0031005 filamin       | 4/1421  | 15/18432  | 0.024132941 | 0.1266660 | 0.10067153 | DPYSL3/NEBL/RFLNB/PDLIM  | 4  | 0.266666666666667 |
| GO:0046965 MF | GO:0046965 nuclear       | 4/1421  | 15/18432  | 0.024132941 | 0.1266660 | 0.10067153 | HMGA1/NR4A2/NRIP1/TACC1  | 4  | 0.266666666666667 |
| GO:0051371 MF | GO:0051371 muscle alpha- | 4/1421  | 15/18432  | 0.024132941 | 0.1266660 | 0.10067153 | PDLIM4/PDLIM2/PALLD/PDL  | 4  | 0.266666666666667 |
| GO:0070700 MF | GO:0070700 BMP receptor  | 4/1421  | 15/18432  | 0.024132941 | 0.1266660 | 0.10067153 | BMP2/BMP6/PYCARD/CDH5    | 4  | 0.266666666666667 |
| GO:0008157 MF | GO:0008157 protein       | 6/1421  | 30/18432  | 0.024835399 | 0.1296669 | 0.10305658 | PPP1R15A/PPP1R3C/PPP1R1  | 6  | 0.2               |
| GO:0005044 MF | GO:0005044 scavenger     | 8/1421  | 47/18432  | 0.025929551 | 0.1346707 | 0.10703353 | PRG4/SCARA3/MSR1/STAB1/  | 8  | 0.170212765957447 |
| GO:0004869 MF | GO:0004869 cysteine-type | 9/1421  | 56/18432  | 0.026476564 | 0.1367955 | 0.10872229 | SPOCK1/PTTG1/BIRC2/NOL3  | 9  | 0.160714285714286 |
| GO:0015035 MF | GO:0015035 protein-      | 7/1421  | 39/18432  | 0.027767912 | 0.1427241 | 0.11343423 | QSOX1/GLRX/TXN/GLRX2/PG  | 7  | 0.179487179487179 |
| GO:0072341 MF | GO:0072341 modified      | 13/1421 | 94/18432  | 0.028013099 | 0.1432422 | 0.11384596 | HSPA8/SCIN/ANXA2/PTGES/  | 13 | 0.138297872340426 |
| GO:0033612 MF | GO:0033612 receptor      | 6/1421  | 31/18432  | 0.028849670 | 0.1459552 | 0.11600218 | MAG12/BMP2/INHBA/BMP6/P  | 6  | 0.193548387096774 |
| GO:0071889 MF | GO:0071889 14-3-3        | 6/1421  | 31/18432  | 0.028849670 | 0.1459552 | 0.11600218 | ZFP36L1/ZFP36/DDIT4/ARR  | 6  | 0.193548387096774 |
| GO:0097110 MF | GO:0097110 scaffold      | 10/1421 | 66/18432  | 0.028985059 | 0.1459552 | 0.11600218 | PLCG2/HSP90AA1/CD163/LY  | 10 | 0.151515151515152 |
| GO:0005092 MF | GO:0005092 GDP-          | 4/1421  | 16/18432  | 0.030260593 | 0.1500925 | 0.11929044 | EIF5/ARHGDI1B/CCDC88A/GD | 4  | 0.25              |
| GO:0010851 MF | GO:0010851 cyclase       | 4/1421  | 16/18432  | 0.030260593 | 0.1500925 | 0.11929044 | CALM2/CALM3/RGS2/CALM1   | 4  | 0.25              |
| GO:0050664 MF | GO:0050664 oxidoreductas | 4/1421  | 16/18432  | 0.030260593 | 0.1500925 | 0.11929044 | CYBB/NCF1/NCF2/CYBA      | 4  | 0.25              |
| GO:0003725 MF | GO:0003725 double-       | 11/1421 | 76/18432  | 0.030741702 | 0.1517202 | 0.12058410 | ACTN1/TUBB4B/SLC3A2/MRP  | 11 | 0.144736842105263 |
| GO:0045309 MF | GO:0045309 protein       | 9/1421  | 58/18432  | 0.032471231 | 0.1593789 | 0.12667105 | SOCS3/PIK3R3/PLCG2/PIK3  | 9  | 0.155172413793103 |
| GO:0019888 MF | GO:0019888 protein       | 13/1421 | 96/18432  | 0.032614836 | 0.1593789 | 0.12667105 | PPP1R14B/RCAN1/PTN/CALM  | 13 | 0.135416666666667 |

|               |                          |         |           |             |           |            |                         |                      |
|---------------|--------------------------|---------|-----------|-------------|-----------|------------|-------------------------|----------------------|
| GO:0030971 MF | GO:0030971 receptor      | 11/1421 | 77/18432  | 0.033462946 | 0.1613502 | 0.12823780 | PIK3R1/SQSTM1/TOB1/DOK2 | 11 0.142857142857143 |
| GO:0050750 MF | GO:0050750 low-density   | 5/1421  | 24/18432  | 0.033506193 | 0.1613502 | 0.12823780 | DAB2/DNAJA1/APOE/PICALM | 5 0.208333333333333  |
| GO:0070412 MF | GO:0070412 R-SMAD        | 5/1421  | 24/18432  | 0.033506193 | 0.1613502 | 0.12823780 | JUN/FOS/RGCC/PMEPA1/DDX | 5 0.208333333333333  |
| GO:0016651 MF | GO:0016651 oxidoreductas | 12/1421 | 87/18432  | 0.034519140 | 0.1654250 | 0.13147641 | NDUFA4/NDUFB1/NDUFA6/DC | 12 0.137931034482759 |
| GO:0008137 MF | GO:0008137 NADH          | 7/1421  | 41/18432  | 0.035543008 | 0.1679102 | 0.13345160 | NDUFA4/NDUFB1/NDUFA6/ND | 7 0.170731707317073  |
| GO:0016667 MF | GO:0016667 oxidoreductas | 9/1421  | 59/18432  | 0.035795282 | 0.1679102 | 0.13345160 | QSOX1/GLRX/TXN/GLRX2/GS | 9 0.152542372881356  |
| GO:0005114 MF | GO:0005114 type II       | 3/1421  | 10/18432  | 0.036391841 | 0.1679102 | 0.13345160 | TGFB1/TGFBR3/ENG        | 3 0.3                |
| GO:0005381 MF | GO:0005381 iron ion      | 3/1421  | 10/18432  | 0.036391841 | 0.1679102 | 0.13345160 | SLC40A1/SLC39A14/SLC25A | 3 0.3                |
| GO:0008239 MF | GO:0008239 dipeptidyl-   | 3/1421  | 10/18432  | 0.036391841 | 0.1679102 | 0.13345160 | FAP/CTSC/PRCP           | 3 0.3                |
| GO:0008330 MF | GO:0008330 protein       | 3/1421  | 10/18432  | 0.036391841 | 0.1679102 | 0.13345160 | DUSP6/DUSP1/DUSP2       | 3 0.3                |
| GO:0016176 MF | GO:0016176 superoxide-   | 3/1421  | 10/18432  | 0.036391841 | 0.1679102 | 0.13345160 | NCF1/NCF2/PDGFB         | 3 0.3                |
| GO:0019869 MF | GO:0019869 chloride      | 3/1421  | 10/18432  | 0.036391841 | 0.1679102 | 0.13345160 | VAMP8/STX7/WNK1         | 3 0.3                |
| GO:0017081 MF | GO:0017081 chloride      | 4/1421  | 17/18432  | 0.037222027 | 0.1701578 | 0.13523792 | VAMP8/SGK1/STX7/WNK1    | 4 0.235294117647059  |
| GO:0046933 MF | GO:0046933 proton-       | 4/1421  | 17/18432  | 0.037222027 | 0.1701578 | 0.13523792 | ATP5ME/ATP6VOC/ATP5F1E/ | 4 0.235294117647059  |
| GO:0004725 MF | GO:0004725 protein       | 13/1421 | 98/18432  | 0.037737522 | 0.1717230 | 0.13648191 | PTPRD/PTPN12/PTPRC/DUSP | 13 0.13265306122449  |
| GO:0005154 MF | GO:0005154 epidermal     | 6/1421  | 33/18432  | 0.038101553 | 0.1718033 | 0.13654575 | EFEMP1/ARF4/ITGA5/SNX2/ | 6 0.181818181818182  |
| GO:0030291 MF | GO:0030291 protein       | 6/1421  | 33/18432  | 0.038101553 | 0.1718033 | 0.13654575 | HEXIM1/CDKN1A/SPRY2/HSP | 6 0.181818181818182  |
| GO:0008022 MF | GO:0008022 protein C-    | 21/1421 | 181/18432 | 0.039224547 | 0.1756598 | 0.13961077 | TCF4/DAB2/ECM1/ZBTB16/F | 21 0.116022099447514 |
| GO:0030247 MF | GO:0030247 polysaccharid | 5/1421  | 25/18432  | 0.039310965 | 0.1756598 | 0.13961077 | PRG4/PPP1R3C/HLA-       | 5 0.2                |
| GO:0008307 MF | GO:0008307 structural    | 7/1421  | 42/18432  | 0.039920213 | 0.1767895 | 0.14050864 | TPM4/MYL9/TPM1/NEBL/PLE | 7 0.166666666666667  |
| GO:0050136 MF | GO:0050136 NADH          | 7/1421  | 42/18432  | 0.039920213 | 0.1767895 | 0.14050864 | NDUFA4/NDUFB1/NDUFA6/ND | 7 0.166666666666667  |
| GO:0003743 MF | GO:0003743 translation   | 8/1421  | 51/18432  | 0.040113686 | 0.1768567 | 0.14056211 | EIF1/EIF1B/EIF2S2/EIF4E | 8 0.156862745098039  |
| GO:0008376 MF | GO:0008376 acetylgalacto | 6/1421  | 34/18432  | 0.043360277 | 0.1903247 | 0.15126617 | GALNT1/GALNT15/CSGALNAC | 6 0.176470588235294  |
| GO:0035615 MF | GO:0035615 clathrin      | 4/1421  | 18/18432  | 0.045024742 | 0.1950416 | 0.15501508 | DAB2/AP1S2/AP2A2/AP2S1  | 4 0.222222222222222  |
| GO:0043395 MF | GO:0043395 heparan       | 4/1421  | 18/18432  | 0.045024742 | 0.1950416 | 0.15501508 | COMP/CFH/PTPRC/APOE     | 4 0.222222222222222  |
| GO:0045236 MF | GO:0045236 CXCR          | 4/1421  | 18/18432  | 0.045024742 | 0.1950416 | 0.15501508 | CXCL8/CXCL2/CXCL3/CXCL1 | 4 0.222222222222222  |
| GO:0004364 MF | GO:0004364 glutathione   | 5/1421  | 26/18432  | 0.045689807 | 0.1952425 | 0.15517476 | GSTO1/PTGES/ALOX5AP/LTC | 5 0.192307692307692  |
| GO:0030507 MF | GO:0030507 spectrin      | 5/1421  | 26/18432  | 0.045689807 | 0.1952425 | 0.15517476 | EPB41L2/ANK3/DYNC1I1/PT | 5 0.192307692307692  |
| GO:0048027 MF | GO:0048027 mRNA 5'-UTR   | 5/1421  | 26/18432  | 0.045689807 | 0.1952425 | 0.15517476 | LARP6/RPL41/DDX3X/RPS7/ | 5 0.192307692307692  |
| GO:0031267 MF | GO:0031267 small GTPase  | 29/1421 | 272/18432 | 0.047180449 | 0.1952425 | 0.15517476 | RIN2/FLNA/FARP1/NDRG1/R | 29 0.106617647058824 |
| GO:0008199 MF | GO:0008199 ferric iron   | 3/1421  | 11/18432  | 0.047236108 | 0.1952425 | 0.15517476 | TF/FTL/FTH1             | 3 0.272727272727273  |
| GO:0019855 MF | GO:0019855 calcium       | 3/1421  | 11/18432  | 0.047236108 | 0.1952425 | 0.15517476 | CALM2/SLC30A1/CALM1     | 3 0.272727272727273  |
| GO:0031996 MF | GO:0031996 thioesterase  | 3/1421  | 11/18432  | 0.047236108 | 0.1952425 | 0.15517476 | RAC1/CDC42/ARF6         | 3 0.272727272727273  |
| GO:0035256 MF | GO:0035256 G protein-    | 3/1421  | 11/18432  | 0.047236108 | 0.1952425 | 0.15517476 | SLC9A3R2/CALM3/FYN      | 3 0.272727272727273  |
| GO:0047134 MF | GO:0047134 protein-      | 3/1421  | 11/18432  | 0.047236108 | 0.1952425 | 0.15517476 | TXN/PGK1/SELENOT        | 3 0.272727272727273  |
| GO:0097371 MF | GO:0097371 MDM2/MDM4     | 3/1421  | 11/18432  | 0.047236108 | 0.1952425 | 0.15517476 | RPS20/RPS15/RPL37       | 3 0.272727272727273  |

|               |                          |         |          |             |           |            |                         |    |                   |
|---------------|--------------------------|---------|----------|-------------|-----------|------------|-------------------------|----|-------------------|
| GO:0097493 MF | GO:0097493 structural    | 3/1421  | 11/18432 | 0.047236108 | 0.1952425 | 0.15517476 | FBN1/EMILIN2/AHNAK      | 3  | 0.272727272727273 |
| GO:0140296 MF | GO:0140296 general       | 8/1421  | 53/18432 | 0.048833798 | 0.2010088 | 0.15975765 | JUN/TCF4/GTF2B/ATF4/AHR | 8  | 0.150943396226415 |
| GO:0003954 MF | GO:0003954 NADH          | 7/1421  | 44/18432 | 0.049691562 | 0.2035650 | 0.16178926 | NDUFA4/NDUFB1/NDUFA6/ND | 7  | 0.159090909090909 |
| GO:0051219 MF | GO:0051219 phosphoprotei | 12/1421 | 92/18432 | 0.049865221 | 0.2035650 | 0.16178926 | SOCS3/PIK3R3/PLCG2/PIK3 | 12 | 0.130434782608696 |
